# Supplementary material
Source: Research Square preprint supplement (doi:10.21203/rs.3.rs-9792564/v1)
Supplement: Supplementary file 1 [file 40473d48e3ba9370643ec589.docx]

Supplemental Information for

Quantifying Workflow Bias in Antimicrobial Resistance Gene Wastewater Surveillancevia Metagenomics Workflows

Ishi Keenum1,2*, Stephanie Servetas2, Scott Jackson2

1 Civil, Environmental and Geospatial Engineering, Michigan Technological University, Houghton, MI 49930 USA

2Complex Microbial Systems Group, Biosystems and Biomaterials Division, National Institute of Standards and Technology, Gaithersburg, MD, 20899, USA

Table S1: Systematic Literature Review Search Terms and Extracted Workflow Information

| Tier 1 | Metagenomic Sequencing, Topic Search | "next generation sequencing" OR "next-generation sequencing" OR "NGS" OR "metagenom*" OR "metagenom* sequencing" OR "high throughput sequencing" OR "high-throughput sequencing" OR “wastewater sequencing” |
| --- | --- | --- |
| Tier 2 | Wastewater/water, Title Search | “influent" OR ”wastewater" OR "wastewater treatment plant" "sewage" |
| Extracted Data |  | Reference, Publication Year, Sequencing Approach, Target, Country, Continent, Matrix Specific, Purpose, Sampling Volume, Sampling year, Concentration Method, Filter info, Extraction method, Clean up kit method, DNA Quantification, DNA Quality, Sequencing Platforms, Sequencer, Library Prep Method, Read Length, Conclusion, Stored, SRA BioProject, SRA Accession |

**Identification of studies via databases and registers**

Records identified from*:

Databases (n = 953)

**Identification**

Records screened

(n =936 )

Records excluded**

(n =833 )

Reports sought for retrieval

(n = 103)

Reports not retrieved

(n = 103 )

**Screening**

Reports assessed for eligibility

(n = 103)

Reports excluded:

16S rRNA Amplicon (n = 3 )

Targetted Sequencing only (n = 11)

Studies included in review

(n = 89 )

**Included**

Figure S1: PRISMA Flow Chart1

SI Figure S1: Top 15 Genera across all samples
