# Supplementary material
Source: Research Square preprint supplement (doi:10.21203/rs.3.rs-9792564/v1)
Supplement: Supplementary file 2 [file cc41350c62451e389df99df7.xlsx]

## Sheet: Sheet2
Run	Assay Type	BioProject	BioSample	Center_Name	Consent	Experiment	Instrument_long	Instrument	Library Name	LibraryLayout	LibrarySelection	LibrarySource	Organism	Platform	ReleaseDate	Sample Name	SRA Study	DATASTORE filetype	DATASTORE provider	DATASTORE region	Bytes	geo_loc_name_country	geo_loc_name_country_continent	Collection_Date	AvgSpotLen	Bases	BioSampleModel	geo_loc_name	Isolation_Source	Lat	Long	ENA-FIRST-PUBLIC (run)	ENA-FIRST-PUBLIC	ENA-LAST-UPDATE (run)	ENA-LAST-UPDATE	External_Id	INSDC_center_alias	INSDC_center_name	INSDC_first_public	INSDC_last_update	INSDC_status	sample_name	Submitter_Id	geographic_location_(country_and/or_sea)	geographic_location_(latitude)	geographic_location_(longitude)	Broker_name	Investigation_type	sewage_type
ERR2607371	WGS	PRJEB27054	SAMEA4700692	CENTRE FOR GENOMIC EPIDEMIOLOGY, NATIONAL FOOD INS	public	ERX2624027	Illumina HiSeq 3000		unspecified	PAIRED	RANDOM	METAGENOMIC	wastewater metagenome	ILLUMINA	2018-07-03T00:00:00Z	SAMEA4700692	ERP109094	sra,fastq	gs,ena,s3,ncbi	ena,gs.US,ncbi.public,s3.us-east-1	2147387639	Albania	Europe	2016-01-02	302	4614126328		Albania		41.3404	19.7716	2018-06-14	2018-06-14	2018-11-16	2018-05-31	SAMEA4700692	DTU-GE	Centre for Genomic Epidemiology\, National Food Institute\, Technical University of Denmark (DTU)\, Denmark	2018-06-14T17:03:25Z	2018-05-31T13:35:05Z	public	ALB-17_1	ALB-17_1		41.3404	19.7716	Centre for Genomic Epidemiology
ERR2607372	WGS	PRJEB27054	SAMEA4700693	CENTRE FOR GENOMIC EPIDEMIOLOGY, NATIONAL FOOD INS	public	ERX2624028	Illumina HiSeq 3000		unspecified	PAIRED	RANDOM	METAGENOMIC	wastewater metagenome	ILLUMINA	2018-07-03T00:00:00Z	SAMEA4700693	ERP109094	sra,fastq	gs,s3,ena,ncbi	ncbi.public,gs.US,s3.us-east-1,ena	3749399646	Albania	Europe	2016-01-02	302	7418594062		Albania		41.3404	19.7716	2018-06-14	2018-06-14	2018-11-16	2018-05-31	SAMEA4700693	DTU-GE	Centre for Genomic Epidemiology\, National Food Institute\, Technical University of Denmark (DTU)\, Denmark	2018-06-14T17:03:25Z	2018-05-31T13:35:05Z	public	ALB-17_2	ALB-17_2		41.3404	19.7716	Centre for Genomic Epidemiology
ERR2607373	WGS	PRJEB27054	SAMEA4700694	CENTRE FOR GENOMIC EPIDEMIOLOGY, NATIONAL FOOD INS	public	ERX2624029	Illumina HiSeq 3000		unspecified	PAIRED	RANDOM	METAGENOMIC	wastewater metagenome	ILLUMINA	2018-07-03T00:00:00Z	SAMEA4700694	ERP109094	sra,fastq	ena,s3,gs,ncbi	gs.US,s3.us-east-1,ncbi.public,ena	5040023851	Albania	Europe	2016-01-02	302	12280941740		Albania		41.3404	19.7716	2018-06-14	2018-06-14	2018-11-16	2018-05-31	SAMEA4700694	DTU-GE	Centre for Genomic Epidemiology\, National Food Institute\, Technical University of Denmark (DTU)\, Denmark	2018-06-14T17:03:25Z	2018-05-31T13:35:05Z	public	ALB-17	ALB-17		41.3404	19.7716	Centre for Genomic Epidemiology
ERR2592244	WGS	PRJEB13831	SAMEA4527599	DTU CGE	public	ERX2608520	Illumina HiSeq 3000	Illumina HiSeq	ALB.17_3	PAIRED	RANDOM	METAGENOMIC	wastewater metagenome	ILLUMINA	2019-02-08T00:00:00Z	SAMEA4527599	ERP015409	fastq,sra	ena,gs,ncbi,s3	ena,gs.US,ncbi.public,s3.us-east-1	3771925632	Albania	Europe	2016-02-01						41.3275	9.8187	2019-01-31	2019-01-31	2018-11-16	2016-10-31	SAMEA4527599	DTU	Technical University of Denmark	2019-01-31T17:02:41Z	2016-10-31T11:12:16Z	public	ALB.17	ALB.17	Albania	41.3275? N	9.8187? E	Centre for Genomic Epidemiology	metagenome	stream
ERR1713331	WGS	PRJEB13831	SAMEA4527599	DTU	public	ERX1783565	Illumina HiSeq 3000	Illumina HiSeq	ALB.17	PAIRED	RANDOM	METAGENOMIC	wastewater metagenome	ILLUMINA	2019-02-08T00:00:00Z	SAMEA4527599	ERP015409	fastq,sra	ena,gs,ncbi,s3	ena,gs.US,ncbi.public,s3.us-east-1	5023479810	Albania	Europe	2016-02-01	302	12240042182				41.3275	9.8187	2019-01-31	2019-01-31	2018-11-16	2016-10-31	SAMEA4527599	DTU	Technical University of Denmark	2019-01-31T17:02:41Z	2016-10-31T11:12:16Z	public	ALB.17	ALB.17	Albania	41.3275? N	9.8187? E	Centre for Genomic Epidemiology	metagenome	stream
ERR1725938	WGS	PRJEB13831	SAMEA4527599	DTU	public	ERX1795923	Illumina HiSeq 3000	Illumina HiSeq	ALB.17_2	PAIRED	RANDOM	METAGENOMIC	wastewater metagenome	ILLUMINA	2019-02-08T00:00:00Z	SAMEA4527599	ERP015409	fastq,sra	ena,gs,ncbi,s3	ena,gs.US,ncbi.public,s3.us-east-1	2154478794	Albania	Europe	2016-02-01						41.3275	9.8187	2019-01-31	2019-01-31	2018-11-16	2016-10-31	SAMEA4527599	DTU	Technical University of Denmark	2019-01-31T17:02:41Z	2016-10-31T11:12:16Z	public	ALB.17	ALB.17	Albania	41.3275? N	9.8187? E	Centre for Genomic Epidemiology	metagenome	stream
ERR2200450	WGS	PRJEB23496	SAMEA4527599	ERASMUS MC, UNIVERISTY MEDICAL CENTER	public	ERX2255438	Ion Torrent S5 XL	Ion Torrent S5 XL	Ion Xpress‚Ñ¢ Plus Fragment Library Kit	SINGLE	RANDOM	METAGENOMIC	wastewater metagenome	ION_TORRENT	2020-05-30T00:00:00Z	SAMEA4527599	ERP105254	sra	gs,ncbi,s3	gs.US,ncbi.public,s3.us-east-1	1159729777	Albania	Europe	2016-02-01						41.3275	9.8187	2020-05-29	2019-01-31	2018-11-16	2016-10-31	SAMEA4527599	DTU	Technical University of Denmark	2019-01-31T17:02:41Z	2016-10-31T11:12:16Z	public	ALB.17	ALB.17	Albania	41.3275? N	9.8187? E	Centre for Genomic Epidemiology	metagenome	stream
ERR2683210	WGS	PRJEB27621	SAMEA4777467	CENTRE FOR GENOMIC EPIDEMIOLOGY, NATIONAL FOOD INS	public	ERX2697824	Illumina NovaSeq 6000		unspecified	PAIRED	RANDOM	METAGENOMIC	wastewater metagenome	ILLUMINA	2020-07-02T00:00:00Z	SAMEA4777467	ERP109726	sra	ncbi,gs,s3	ncbi.public,s3.us-east-1,gs.US	3478290626	Albania	Europe	2017-06-05				Albania		41.3571	19.7709	2020-07-01	2020-07-01	2018-11-16	2018-07-04	SAMEA4777467	DTU-GE	Centre for Genomic Epidemiology\, National Food Institute\, Technical University of Denmark (DTU)\, Denmark	2020-07-01T04:04:01Z	2018-07-04T17:53:42Z	public	DTU2017_MG_36_AL_TI	DTU2017_MG_36_AL_TI		41.3571	19.7709	Centre for Genomic Epidemiology
ERR4682374	WGS	PRJEB40815	SAMEA7428281	CENTRE FOR GENOMIC EPIDEMIOLOGY, NATIONAL FOOD INS	public	ERX4603826	Illumina NovaSeq 6000		unspecified	PAIRED	RANDOM	METAGENOMIC	wastewater metagenome	ILLUMINA	2021-06-25T00:00:00Z	SAMEA7428281	ERP124492	sra,fastq	ncbi,s3,gs	s3.us-east-1,gs.US,ncbi.public	3810896440	Albania	Europe	2017-11-20	302	11788634930		Albania		41.3404	19.7716	2021-06-24	2021-06-24	2021-06-24	2021-06-24	SAMEA7428281	DTU-GE	Centre for Genomic Epidemiology\, National Food Institute\, Technical University of Denmark (DTU)\, Denmark	2021-06-24T12:26:18Z	2021-06-24T12:26:18Z	public	DTU_2017_537_1_MG_AL_TI_233	DTU_2017_537_1_MG_AL_TI_233				Centre for Genomic Epidemiology
ERR4682453	WGS	PRJEB40815	SAMEA7428360	CENTRE FOR GENOMIC EPIDEMIOLOGY, NATIONAL FOOD INS	public	ERX4603905	Illumina NovaSeq 6000		unspecified	PAIRED	RANDOM	METAGENOMIC	wastewater metagenome	ILLUMINA	2021-06-25T00:00:00Z	SAMEA7428360	ERP124492	fastq,sra	gs,ncbi,s3	ncbi.public,s3.us-east-1,gs.US	4161330939	Argentina	South America	2017-11-22	301	12605463506		Argentina		-38.4161	-63.6167	2021-06-24	2021-06-24	2021-06-24	2021-06-24	SAMEA7428360	DTU-GE	Centre for Genomic Epidemiology\, National Food Institute\, Technical University of Denmark (DTU)\, Denmark	2021-06-24T12:26:19Z	2021-06-24T12:26:19Z	public	DTU_2017_622_1_MG_AR_BA_318	DTU_2017_622_1_MG_AR_BA_318				Centre for Genomic Epidemiology
ERR4682844	WGS	PRJEB40816	SAMEA7428486	CENTRE FOR GENOMIC EPIDEMIOLOGY, NATIONAL FOOD INS	public	ERX4604293	Illumina NovaSeq 6000		unspecified	PAIRED	RANDOM	METAGENOMIC	wastewater metagenome	ILLUMINA	2021-06-25T00:00:00Z	SAMEA7428486	ERP124493	sra,fastq	gs,ncbi,s3	gs.US,s3.us-east-1,ncbi.public	4089028633	Argentina	South America	2018-07-10	294	12132488167		Argentina		-38.4161	-63.6167	2021-06-24	2021-06-24	2021-06-24	2021-06-24	SAMEA7428486	DTU-GE	Centre for Genomic Epidemiology\, National Food Institute\, Technical University of Denmark (DTU)\, Denmark	2021-06-24T12:26:18Z	2021-06-24T12:26:18Z	public	DTU_2018_722_1_MG_AR_BA_419	DTU_2018_722_1_MG_AR_BA_419				Centre for Genomic Epidemiology
ERR4678664	WGS	PRJEB40798	SAMEA7426364	CENTRE FOR GENOMIC EPIDEMIOLOGY, NATIONAL FOOD INS	public	ERX4600288	Illumina NovaSeq 6000		unspecified	PAIRED	RANDOM	METAGENOMIC	wastewater metagenome	ILLUMINA	2021-06-25T00:00:00Z	SAMEA7426364	ERP124466	fastq,sra	ncbi,s3,gs	gs.US,ncbi.public,s3.us-east-1	2886227257	Argentina	South America	2018-12-08	302	9398311876		Argentina		-38.4161	-63.6167	2021-06-24	2021-06-24	2021-06-24	2021-06-24	SAMEA7426364	DTU-GE	Centre for Genomic Epidemiology\, National Food Institute\, Technical University of Denmark (DTU)\, Denmark	2021-06-24T12:26:14Z	2021-06-24T12:26:14Z	public	DTU_2018_909_1_MG_AR_BA_594	DTU_2018_909_1_MG_AR_BA_594				Centre for Genomic Epidemiology
ERR2592245	WGS	PRJEB13831	SAMEA4527600	DTU CGE	public	ERX2608521	Illumina HiSeq 3000	Illumina HiSeq	AUS.18_5	PAIRED	RANDOM	METAGENOMIC	wastewater metagenome	ILLUMINA	2019-02-08T00:00:00Z	SAMEA4527600	ERP015409	fastq,sra	ena,gs,ncbi,s3	ena,gs.US,ncbi.public,s3.us-east-1	2937503102	Australia	Oceania	2016-02-04						-35.3452	149.095	2019-01-31	2019-01-31	2018-11-16	2016-10-31	SAMEA4527600	DTU	Technical University of Denmark	2019-01-31T17:02:41Z	2016-10-31T11:12:16Z	public	AUS.18	AUS.18	Australia	35.3452? S	149.0950? E	Centre for Genomic Epidemiology	metagenome	wastewater treatment plant
ERR1713332	WGS	PRJEB13831	SAMEA4527600	DTU	public	ERX1783566	Illumina HiSeq 3000	Illumina HiSeq	AUS.18	PAIRED	RANDOM	METAGENOMIC	wastewater metagenome	ILLUMINA	2019-02-08T00:00:00Z	SAMEA4527600	ERP015409	fastq,sra	ena,gs,ncbi,s3	ena,gs.US,ncbi.public,s3.us-east-1	2086331585	Australia	Oceania	2016-02-04	302	4935601704				-35.3452	149.095	2019-01-31	2019-01-31	2018-11-16	2016-10-31	SAMEA4527600	DTU	Technical University of Denmark	2019-01-31T17:02:41Z	2016-10-31T11:12:16Z	public	AUS.18	AUS.18	Australia	35.3452? S	149.0950? E	Centre for Genomic Epidemiology	metagenome	wastewater treatment plant
ERR1725939	WGS	PRJEB13831	SAMEA4527600	DTU	public	ERX1795924	Illumina HiSeq 3000	Illumina HiSeq	AUS.18_2	PAIRED	RANDOM	METAGENOMIC	wastewater metagenome	ILLUMINA	2019-02-08T00:00:00Z	SAMEA4527600	ERP015409	fastq,sra	ena,gs,ncbi,s3	ena,gs.US,ncbi.public,s3.us-east-1	624678269	Australia	Oceania	2016-02-04						-35.3452	149.095	2019-01-31	2019-01-31	2018-11-16	2016-10-31	SAMEA4527600	DTU	Technical University of Denmark	2019-01-31T17:02:41Z	2016-10-31T11:12:16Z	public	AUS.18	AUS.18	Australia	35.3452? S	149.0950? E	Centre for Genomic Epidemiology	metagenome	wastewater treatment plant
ERR1725940	WGS	PRJEB13831	SAMEA4527600	DTU	public	ERX1795925	Illumina HiSeq 3000	Illumina HiSeq	AUS.18_3	PAIRED	RANDOM	METAGENOMIC	wastewater metagenome	ILLUMINA	2019-02-08T00:00:00Z	SAMEA4527600	ERP015409	fastq,sra	ena,gs,ncbi,s3	ena,gs.US,ncbi.public,s3.us-east-1	504727343	Australia	Oceania	2016-02-04						-35.3452	149.095	2019-01-31	2019-01-31	2018-11-16	2016-10-31	SAMEA4527600	DTU	Technical University of Denmark	2019-01-31T17:02:41Z	2016-10-31T11:12:16Z	public	AUS.18	AUS.18	Australia	35.3452? S	149.0950? E	Centre for Genomic Epidemiology	metagenome	wastewater treatment plant
ERR2592328	WGS	PRJEB13831	SAMEA4527600	DTU CGE	public	ERX2608604	Illumina HiSeq 3000	Illumina HiSeq	AUS.18_4	PAIRED	RANDOM	METAGENOMIC	wastewater metagenome	ILLUMINA	2019-02-08T00:00:00Z	SAMEA4527600	ERP015409	fastq,sra	ena,gs,ncbi,s3	ena,gs.US,ncbi.public,s3.us-east-1	3002973204	Australia	Oceania	2016-02-04						-35.3452	149.095	2019-01-31	2019-01-31	2018-11-16	2016-10-31	SAMEA4527600	DTU	Technical University of Denmark	2019-01-31T17:02:41Z	2016-10-31T11:12:16Z	public	AUS.18	AUS.18	Australia	35.3452? S	149.0950? E	Centre for Genomic Epidemiology	metagenome	wastewater treatment plant
ERR2322884	WGS	PRJEB23496	SAMEA4527600	ERASMUS MC, UNIVERISTY MEDICAL CENTER	public	ERX2373847	Ion Torrent S5 XL	Ion Torrent S5 XL	Ion Xpress‚Ñ¢ Plus Fragment Library Kit	SINGLE	RANDOM	METAGENOMIC	wastewater metagenome	ION_TORRENT	2020-05-30T00:00:00Z	SAMEA4527600	ERP105254	sra	gs,ncbi,s3	gs.US,ncbi.public,s3.us-east-1	1189057568	Australia	Oceania	2016-02-04						-35.3452	149.095	2020-05-29	2019-01-31	2018-11-16	2016-10-31	SAMEA4527600	DTU	Technical University of Denmark	2019-01-31T17:02:41Z	2016-10-31T11:12:16Z	public	AUS.18	AUS.18	Australia	35.3452? S	149.0950? E	Centre for Genomic Epidemiology	metagenome	wastewater treatment plant
ERR1713333	WGS	PRJEB13831	SAMEA4527601	DTU	public	ERX1783567	Illumina HiSeq 3000	Illumina HiSeq	AUS.18a	PAIRED	RANDOM	METAGENOMIC	wastewater metagenome	ILLUMINA	2019-02-08T00:00:00Z	SAMEA4527601	ERP015409	fastq,sra	ena,gs,ncbi,s3	ena,gs.US,ncbi.public,s3.us-east-1	811737568	Australia	Oceania	2016-02-08						-37.9145	144.643	2019-01-31	2019-01-31	2018-11-16	2016-10-31	SAMEA4527601	DTU	Technical University of Denmark	2019-01-31T17:02:41Z	2016-10-31T11:12:16Z	public	AUS.18a	AUS.18a	Australia	37.9145? S	144.6432? E	Centre for Genomic Epidemiology	metagenome	wastewater treatment plant
ERR1725941	WGS	PRJEB13831	SAMEA4527601	DTU	public	ERX1795926	Illumina HiSeq 3000	Illumina HiSeq	AUS.18a_2	PAIRED	RANDOM	METAGENOMIC	wastewater metagenome	ILLUMINA	2019-02-08T00:00:00Z	SAMEA4527601	ERP015409	fastq,sra	ena,gs,ncbi,s3	ena,gs.US,ncbi.public,s3.us-east-1	495058656	Australia	Oceania	2016-02-08						-37.9145	144.643	2019-01-31	2019-01-31	2018-11-16	2016-10-31	SAMEA4527601	DTU	Technical University of Denmark	2019-01-31T17:02:41Z	2016-10-31T11:12:16Z	public	AUS.18a	AUS.18a	Australia	37.9145? S	144.6432? E	Centre for Genomic Epidemiology	metagenome	wastewater treatment plant
ERR1725942	WGS	PRJEB13831	SAMEA4527601	DTU	public	ERX1795927	Illumina HiSeq 3000	Illumina HiSeq	AUS.18a_3	PAIRED	RANDOM	METAGENOMIC	wastewater metagenome	ILLUMINA	2019-02-08T00:00:00Z	SAMEA4527601	ERP015409	fastq,sra	ena,gs,ncbi,s3	ena,gs.US,ncbi.public,s3.us-east-1	4819674268	Australia	Oceania	2016-02-08	302	10806820548				-37.9145	144.643	2019-01-31	2019-01-31	2018-11-16	2016-10-31	SAMEA4527601	DTU	Technical University of Denmark	2019-01-31T17:02:41Z	2016-10-31T11:12:16Z	public	AUS.18a	AUS.18a	Australia	37.9145? S	144.6432? E	Centre for Genomic Epidemiology	metagenome	wastewater treatment plant
ERR1725943	WGS	PRJEB13831	SAMEA4527601	DTU	public	ERX1795928	Illumina HiSeq 3000	Illumina HiSeq	AUS.18a_4	PAIRED	RANDOM	METAGENOMIC	wastewater metagenome	ILLUMINA	2019-02-08T00:00:00Z	SAMEA4527601	ERP015409	fastq,sra	ena,gs,ncbi,s3	ena,gs.US,ncbi.public,s3.us-east-1	222301639	Australia	Oceania	2016-02-08						-37.9145	144.643	2019-01-31	2019-01-31	2018-11-16	2016-10-31	SAMEA4527601	DTU	Technical University of Denmark	2019-01-31T17:02:41Z	2016-10-31T11:12:16Z	public	AUS.18a	AUS.18a	Australia	37.9145? S	144.6432? E	Centre for Genomic Epidemiology	metagenome	wastewater treatment plant
ERR1725944	WGS	PRJEB13831	SAMEA4527601	DTU	public	ERX1795929	Illumina HiSeq 3000	Illumina HiSeq	AUS.18a_5	PAIRED	RANDOM	METAGENOMIC	wastewater metagenome	ILLUMINA	2019-02-08T00:00:00Z	SAMEA4527601	ERP015409	fastq,sra	ena,gs,ncbi,s3	ena,gs.US,ncbi.public,s3.us-east-1	2196161669	Australia	Oceania	2016-02-08						-37.9145	144.643	2019-01-31	2019-01-31	2018-11-16	2016-10-31	SAMEA4527601	DTU	Technical University of Denmark	2019-01-31T17:02:41Z	2016-10-31T11:12:16Z	public	AUS.18a	AUS.18a	Australia	37.9145? S	144.6432? E	Centre for Genomic Epidemiology	metagenome	wastewater treatment plant
ERR2322876	WGS	PRJEB23496	SAMEA4527601	ERASMUS MC, UNIVERISTY MEDICAL CENTER	public	ERX2373839	Ion Torrent S5 XL	Ion Torrent S5 XL	Ion Xpress‚Ñ¢ Plus Fragment Library Kit	SINGLE	RANDOM	METAGENOMIC	wastewater metagenome	ION_TORRENT	2020-05-30T00:00:00Z	SAMEA4527601	ERP105254	sra	gs,ncbi,s3	gs.US,ncbi.public,s3.us-east-1	912031475	Australia	Oceania	2016-02-08	298	1141334744				-37.9145	144.643	2020-05-29	2019-01-31	2018-11-16	2016-10-31	SAMEA4527601	DTU	Technical University of Denmark	2019-01-31T17:02:41Z	2016-10-31T11:12:16Z	public	AUS.18a	AUS.18a	Australia	37.9145? S	144.6432? E	Centre for Genomic Epidemiology	metagenome	wastewater treatment plant
ERR2607374	WGS	PRJEB27054	SAMEA4700695	CENTRE FOR GENOMIC EPIDEMIOLOGY, NATIONAL FOOD INS	public	ERX2624030	Illumina HiSeq 3000		unspecified	PAIRED	RANDOM	METAGENOMIC	wastewater metagenome	ILLUMINA	2018-07-03T00:00:00Z	SAMEA4700695	ERP109094	sra,fastq	ena,gs,s3,ncbi	gs.US,ena,ncbi.public,s3.us-east-1	619941191	Australia	Oceania	2016-04-02	302	1323584460		Australia		-35.2464	148.97	2018-06-14	2018-06-14	2018-11-16	2018-05-31	SAMEA4700695	DTU-GE	Centre for Genomic Epidemiology\, National Food Institute\, Technical University of Denmark (DTU)\, Denmark	2018-06-14T17:03:25Z	2018-05-31T13:35:05Z	public	AUS-18_1	AUS-18_1		-35.2464	148.97	Centre for Genomic Epidemiology
ERR2607375	WGS	PRJEB27054	SAMEA4700696	CENTRE FOR GENOMIC EPIDEMIOLOGY, NATIONAL FOOD INS	public	ERX2624031	Illumina HiSeq 3000		unspecified	PAIRED	RANDOM	METAGENOMIC	wastewater metagenome	ILLUMINA	2018-07-03T00:00:00Z	SAMEA4700696	ERP109094	fastq,sra	ena,s3,ncbi,gs	ncbi.public,s3.us-east-1,gs.US,ena	500864912	Australia	Oceania	2016-04-02	302	992424246		Australia		-35.2464	148.97	2018-06-14	2018-06-14	2018-11-16	2018-05-31	SAMEA4700696	DTU-GE	Centre for Genomic Epidemiology\, National Food Institute\, Technical University of Denmark (DTU)\, Denmark	2018-06-14T17:03:25Z	2018-05-31T13:35:05Z	public	AUS-18_2	AUS-18_2		-35.2464	148.97	Centre for Genomic Epidemiology
ERR2607376	WGS	PRJEB27054	SAMEA4700697	CENTRE FOR GENOMIC EPIDEMIOLOGY, NATIONAL FOOD INS	public	ERX2624032	Illumina HiSeq 3000		unspecified	PAIRED	RANDOM	METAGENOMIC	wastewater metagenome	ILLUMINA	2018-07-03T00:00:00Z	SAMEA4700697	ERP109094	sra,fastq	gs,ena,s3,ncbi	gs.US,ncbi.public,s3.us-east-1,ena	2990622211	Australia	Oceania	2016-04-02	302	6099152740		Australia		-35.2464	148.97	2018-06-14	2018-06-14	2018-11-16	2018-05-31	SAMEA4700697	DTU-GE	Centre for Genomic Epidemiology\, National Food Institute\, Technical University of Denmark (DTU)\, Denmark	2018-06-14T17:03:25Z	2018-05-31T13:35:05Z	public	AUS-18_3	AUS-18_3		-35.2464	148.97	Centre for Genomic Epidemiology
ERR2607377	WGS	PRJEB27054	SAMEA4700698	CENTRE FOR GENOMIC EPIDEMIOLOGY, NATIONAL FOOD INS	public	ERX2624033	Illumina HiSeq 3000		unspecified	PAIRED	RANDOM	METAGENOMIC	wastewater metagenome	ILLUMINA	2018-07-03T00:00:00Z	SAMEA4700698	ERP109094	sra,fastq	gs,ena,ncbi,s3	gs.US,ena,ncbi.public,s3.us-east-1	2919021337	Australia	Oceania	2016-04-02	302	5774372276		Australia		-35.2464	148.97	2018-06-14	2018-06-14	2018-11-16	2018-05-31	SAMEA4700698	DTU-GE	Centre for Genomic Epidemiology\, National Food Institute\, Technical University of Denmark (DTU)\, Denmark	2018-06-14T17:03:25Z	2018-05-31T13:35:05Z	public	AUS-18_4	AUS-18_4		-35.2464	148.97	Centre for Genomic Epidemiology
ERR2607383	WGS	PRJEB27054	SAMEA4700704	CENTRE FOR GENOMIC EPIDEMIOLOGY, NATIONAL FOOD INS	public	ERX2624039	Illumina HiSeq 3000		unspecified	PAIRED	RANDOM	METAGENOMIC	wastewater metagenome	ILLUMINA	2018-07-03T00:00:00Z	SAMEA4700704	ERP109094	sra,fastq	s3,gs,ena,ncbi	s3.us-east-1,ncbi.public,ena,gs.US	2087414919	Australia	Oceania	2016-04-02	302	4938175650		Australia		-35.2464	148.97	2018-06-14	2018-06-14	2018-11-16	2018-05-31	SAMEA4700704	DTU-GE	Centre for Genomic Epidemiology\, National Food Institute\, Technical University of Denmark (DTU)\, Denmark	2018-06-14T17:03:25Z	2018-05-31T13:35:05Z	public	AUS-18	AUS-18		-35.2464	148.97	Centre for Genomic Epidemiology
ERR2607378	WGS	PRJEB27054	SAMEA4700699	CENTRE FOR GENOMIC EPIDEMIOLOGY, NATIONAL FOOD INS	public	ERX2624034	Illumina HiSeq 3000		unspecified	PAIRED	RANDOM	METAGENOMIC	wastewater metagenome	ILLUMINA	2018-07-03T00:00:00Z	SAMEA4700699	ERP109094	fastq,sra	s3,ncbi,gs,ena	s3.us-east-1,ena,gs.US,ncbi.public	489488079	Australia	Oceania	2016-08-02	302	1120203164		Australia		-37.9768	144.638	2018-06-14	2018-06-14	2018-11-16	2018-05-31	SAMEA4700699	DTU-GE	Centre for Genomic Epidemiology\, National Food Institute\, Technical University of Denmark (DTU)\, Denmark	2018-06-14T17:03:25Z	2018-05-31T13:35:05Z	public	AUS-18a_1	AUS-18a_1		-37.9768	144.638	Centre for Genomic Epidemiology
ERR2607379	WGS	PRJEB27054	SAMEA4700700	CENTRE FOR GENOMIC EPIDEMIOLOGY, NATIONAL FOOD INS	public	ERX2624035	Illumina HiSeq 3000		unspecified	PAIRED	RANDOM	METAGENOMIC	wastewater metagenome	ILLUMINA	2018-07-03T00:00:00Z	SAMEA4700700	ERP109094	fastq,sra	ncbi,ena,gs,s3	ena,gs.US,s3.us-east-1,ncbi.public	4820798667	Australia	Oceania	2016-08-02	302	10809358858		Australia		-37.9768	144.638	2018-06-14	2018-06-14	2018-11-16	2018-05-31	SAMEA4700700	DTU-GE	Centre for Genomic Epidemiology\, National Food Institute\, Technical University of Denmark (DTU)\, Denmark	2018-06-14T17:03:25Z	2018-05-31T13:35:05Z	public	AUS-18a_2	AUS-18a_2		-37.9768	144.638	Centre for Genomic Epidemiology
ERR2607380	WGS	PRJEB27054	SAMEA4700701	CENTRE FOR GENOMIC EPIDEMIOLOGY, NATIONAL FOOD INS	public	ERX2624036	Illumina HiSeq 3000		unspecified	PAIRED	RANDOM	METAGENOMIC	wastewater metagenome	ILLUMINA	2018-07-03T00:00:00Z	SAMEA4700701	ERP109094	sra,fastq	ena,ncbi,s3,gs	ncbi.public,gs.US,ena,s3.us-east-1	220130445	Australia	Oceania	2016-08-02	302	473445098		Australia		-37.9768	144.638	2018-06-14	2018-06-14	2018-11-16	2018-05-31	SAMEA4700701	DTU-GE	Centre for Genomic Epidemiology\, National Food Institute\, Technical University of Denmark (DTU)\, Denmark	2018-06-14T17:03:25Z	2018-05-31T13:35:05Z	public	AUS-18a_3	AUS-18a_3		-37.9768	144.638	Centre for Genomic Epidemiology
ERR2607381	WGS	PRJEB27054	SAMEA4700702	CENTRE FOR GENOMIC EPIDEMIOLOGY, NATIONAL FOOD INS	public	ERX2624037	Illumina HiSeq 3000		unspecified	PAIRED	RANDOM	METAGENOMIC	wastewater metagenome	ILLUMINA	2018-07-03T00:00:00Z	SAMEA4700702	ERP109094	sra,fastq	ncbi,ena,s3,gs	ncbi.public,s3.us-east-1,gs.US,ena	2183474724	Australia	Oceania	2016-08-02	302	4642630296		Australia		-37.9768	144.638	2018-06-14	2018-06-14	2018-11-16	2018-05-31	SAMEA4700702	DTU-GE	Centre for Genomic Epidemiology\, National Food Institute\, Technical University of Denmark (DTU)\, Denmark	2018-06-14T17:03:25Z	2018-05-31T13:35:05Z	public	AUS-18a_4	AUS-18a_4		-37.9768	144.638	Centre for Genomic Epidemiology
ERR2607382	WGS	PRJEB27054	SAMEA4700703	CENTRE FOR GENOMIC EPIDEMIOLOGY, NATIONAL FOOD INS	public	ERX2624038	Illumina HiSeq 3000		unspecified	PAIRED	RANDOM	METAGENOMIC	wastewater metagenome	ILLUMINA	2018-07-03T00:00:00Z	SAMEA4700703	ERP109094	sra,fastq	ena,ncbi,gs,s3	ncbi.public,gs.US,s3.us-east-1,ena	803577175	Australia	Oceania	2016-08-02	302	1906828000		Australia		-37.9768	144.638	2018-06-14	2018-06-14	2018-11-16	2018-05-31	SAMEA4700703	DTU-GE	Centre for Genomic Epidemiology\, National Food Institute\, Technical University of Denmark (DTU)\, Denmark	2018-06-14T17:03:25Z	2018-05-31T13:35:05Z	public	AUS-18a	AUS-18a		-37.9768	144.638	Centre for Genomic Epidemiology
ERR2683149	WGS	PRJEB27621	SAMEA4777406	CENTRE FOR GENOMIC EPIDEMIOLOGY, NATIONAL FOOD INS	public	ERX2697763	Illumina NovaSeq 6000		unspecified	PAIRED	RANDOM	METAGENOMIC	wastewater metagenome	ILLUMINA	2020-07-02T00:00:00Z	SAMEA4777406	ERP109726	sra	ncbi,gs,s3	gs.US,ncbi.public,s3.us-east-1	3948729691	Australia	Oceania	2017-06-14				Australia		-37.9145	144.643	2020-07-01	2020-07-01	2018-11-16	2018-07-04	SAMEA4777406	DTU-GE	Centre for Genomic Epidemiology\, National Food Institute\, Technical University of Denmark (DTU)\, Denmark	2020-07-01T04:04:01Z	2018-07-04T17:53:40Z	public	DTU2017_MG_133_AU_ME	DTU2017_MG_133_AU_ME		-37.9145	144.643	Centre for Genomic Epidemiology
ERR2683259	WGS	PRJEB27621	SAMEA4777516	CENTRE FOR GENOMIC EPIDEMIOLOGY, NATIONAL FOOD INS	public	ERX2697873	Illumina NovaSeq 6000		unspecified	PAIRED	RANDOM	METAGENOMIC	wastewater metagenome	ILLUMINA	2020-07-02T00:00:00Z	SAMEA4777516	ERP109726	sra	s3,ncbi,gs	s3.us-east-1,ncbi.public,gs.US	4543274852	Australia	Oceania	2017-06-15				Australia		-12.3646	130.909	2020-07-01	2020-07-01	2018-11-16	2018-07-04	SAMEA4777516	DTU-GE	Centre for Genomic Epidemiology\, National Food Institute\, Technical University of Denmark (DTU)\, Denmark	2020-07-01T04:04:01Z	2018-07-04T17:53:45Z	public	DTU2017_MG_80_AU_DD	DTU2017_MG_80_AU_DD		-12.3646	130.909	Centre for Genomic Epidemiology
ERR2683257	WGS	PRJEB27621	SAMEA4777514	CENTRE FOR GENOMIC EPIDEMIOLOGY, NATIONAL FOOD INS	public	ERX2697871	Illumina NovaSeq 6000		unspecified	PAIRED	RANDOM	METAGENOMIC	wastewater metagenome	ILLUMINA	2020-07-02T00:00:00Z	SAMEA4777514	ERP109726	sra	ncbi,gs,s3	ncbi.public,gs.US,s3.us-east-1	6071522621	Australia	Oceania	2017-06-20				Australia		-12.0405	134.229	2020-07-01	2020-07-01	2018-11-16	2018-07-04	SAMEA4777514	DTU-GE	Centre for Genomic Epidemiology\, National Food Institute\, Technical University of Denmark (DTU)\, Denmark	2020-07-01T04:04:01Z	2018-07-04T17:53:44Z	public	DTU2017_MG_79_AU_MA	DTU2017_MG_79_AU_MA		-1204053	134.229	Centre for Genomic Epidemiology
ERR4682341	WGS	PRJEB40815	SAMEA7428248	CENTRE FOR GENOMIC EPIDEMIOLOGY, NATIONAL FOOD INS	public	ERX4603793	Illumina NovaSeq 6000		unspecified	PAIRED	RANDOM	METAGENOMIC	wastewater metagenome	ILLUMINA	2021-06-25T00:00:00Z	SAMEA7428248	ERP124492	sra,fastq	s3,ncbi,gs	s3.us-east-1,gs.US,ncbi.public	2804922791	Australia	Oceania	2017-11-21	302	8692022966		Australia		-12.0405	134.229	2021-06-24	2021-06-24	2021-06-24	2021-06-24	SAMEA7428248	DTU-GE	Centre for Genomic Epidemiology\, National Food Institute\, Technical University of Denmark (DTU)\, Denmark	2021-06-24T12:26:19Z	2021-06-24T12:26:19Z	public	DTU_2017_500_1_MG_AU_DD_196	DTU_2017_500_1_MG_AU_DD_196				Centre for Genomic Epidemiology
ERR4682342	WGS	PRJEB40815	SAMEA7428249	CENTRE FOR GENOMIC EPIDEMIOLOGY, NATIONAL FOOD INS	public	ERX4603794	Illumina NovaSeq 6000		unspecified	PAIRED	RANDOM	METAGENOMIC	wastewater metagenome	ILLUMINA	2021-06-25T00:00:00Z	SAMEA7428249	ERP124492	fastq,sra	s3,ncbi,gs	s3.us-east-1,gs.US,ncbi.public	4760794975	Australia	Oceania	2017-11-22	302	14496683728		Australia		-12.3646	130.909	2021-06-24	2021-06-24	2021-06-24	2021-06-24	SAMEA7428249	DTU-GE	Centre for Genomic Epidemiology\, National Food Institute\, Technical University of Denmark (DTU)\, Denmark	2021-06-24T12:26:18Z	2021-06-24T12:26:18Z	public	DTU_2017_501_1_MG_AU_MA_197	DTU_2017_501_1_MG_AU_MA_197				Centre for Genomic Epidemiology
ERR4682877	WGS	PRJEB40816	SAMEA7428519	CENTRE FOR GENOMIC EPIDEMIOLOGY, NATIONAL FOOD INS	public	ERX4604326	Illumina NovaSeq 6000		unspecified	PAIRED	RANDOM	METAGENOMIC	wastewater metagenome	ILLUMINA	2021-06-24T00:00:00Z	SAMEA7428519	ERP124493	sra,fastq	s3,ncbi,gs	s3.us-east-1,gs.US,ncbi.public	4392345425	Australia	Oceania	2018-06-19	282	13317479092		Australia		-12.3646	130.909	2021-06-24	2021-06-24	2021-06-24	2021-06-24	SAMEA7428519	DTU-GE	Centre for Genomic Epidemiology\, National Food Institute\, Technical University of Denmark (DTU)\, Denmark	2021-06-24T12:26:19Z	2021-06-24T12:26:19Z	public	DTU_2018_757_1_MG_AU_ME_454	DTU_2018_757_1_MG_AU_ME_454				Centre for Genomic Epidemiology
ERR4682878	WGS	PRJEB40816	SAMEA7428520	CENTRE FOR GENOMIC EPIDEMIOLOGY, NATIONAL FOOD INS	public	ERX4604327	Illumina NovaSeq 6000		unspecified	PAIRED	RANDOM	METAGENOMIC	wastewater metagenome	ILLUMINA	2021-06-24T00:00:00Z	SAMEA7428520	ERP124493	sra,fastq	ncbi,s3,gs	ncbi.public,gs.US,s3.us-east-1	3444900813	Australia	Oceania	2018-07-10	296	10713362466		Australia		-12.3646	130.909	2021-06-24	2021-06-24	2021-06-24	2021-06-24	SAMEA7428520	DTU-GE	Centre for Genomic Epidemiology\, National Food Institute\, Technical University of Denmark (DTU)\, Denmark	2021-06-24T12:26:19Z	2021-06-24T12:26:19Z	public	DTU_2018_758_1_MG_AU_DD_455	DTU_2018_758_1_MG_AU_DD_455				Centre for Genomic Epidemiology
ERR4682879	WGS	PRJEB40816	SAMEA7428521	CENTRE FOR GENOMIC EPIDEMIOLOGY, NATIONAL FOOD INS	public	ERX4604328	Illumina NovaSeq 6000		unspecified	PAIRED	RANDOM	METAGENOMIC	wastewater metagenome	ILLUMINA	2021-06-24T00:00:00Z	SAMEA7428521	ERP124493	sra,fastq	gs,ncbi,s3	s3.us-east-1,ncbi.public,gs.US	5123211736	Australia	Oceania	2018-07-10	296	16021408421		Australia		-12.0405	134.229	2021-06-24	2021-06-24	2021-06-24	2021-06-24	SAMEA7428521	DTU-GE	Centre for Genomic Epidemiology\, National Food Institute\, Technical University of Denmark (DTU)\, Denmark	2021-06-24T12:26:19Z	2021-06-24T12:26:19Z	public	DTU_2018_759_1_MG_AU_MA_456	DTU_2018_759_1_MG_AU_MA_456				Centre for Genomic Epidemiology
ERR4678631	WGS	PRJEB40798	SAMEA7426331	CENTRE FOR GENOMIC EPIDEMIOLOGY, NATIONAL FOOD INS	public	ERX4600255	Illumina NovaSeq 6000		unspecified	PAIRED	RANDOM	METAGENOMIC	wastewater metagenome	ILLUMINA	2021-06-25T00:00:00Z	SAMEA7426331	ERP124466	fastq,sra	s3,gs,ncbi	gs.US,s3.us-east-1,ncbi.public	9984616554	Australia	Oceania	2018-12-18	302	33108576496		Australia		-12.3646	130.909	2021-06-24	2021-06-24	2021-06-24	2021-06-24	SAMEA7426331	DTU-GE	Centre for Genomic Epidemiology\, National Food Institute\, Technical University of Denmark (DTU)\, Denmark	2021-06-24T12:26:13Z	2021-06-24T12:26:13Z	public	DTU_2018_876_1_MG_AU_MA_560	DTU_2018_876_1_MG_AU_MA_560				Centre for Genomic Epidemiology
ERR4678630	WGS	PRJEB40798	SAMEA7426330	CENTRE FOR GENOMIC EPIDEMIOLOGY, NATIONAL FOOD INS	public	ERX4600254	Illumina NovaSeq 6000		unspecified	PAIRED	RANDOM	METAGENOMIC	wastewater metagenome	ILLUMINA	2021-06-25T00:00:00Z	SAMEA7426330	ERP124466	fastq,sra	s3,gs,ncbi	ncbi.public,gs.US,s3.us-east-1	4489064345	Australia	Oceania	2018-12-18	302	14685806396		Australia		-12.3646	130.909	2021-06-24	2021-06-24	2021-06-24	2021-06-24	SAMEA7426330	DTU-GE	Centre for Genomic Epidemiology\, National Food Institute\, Technical University of Denmark (DTU)\, Denmark	2021-06-24T12:26:13Z	2021-06-24T12:26:13Z	public	DTU_2018_875_1_MG_AU_DD_559	DTU_2018_875_1_MG_AU_DD_559				Centre for Genomic Epidemiology
ERR2592246	WGS	PRJEB13831	SAMEA4527602	DTU CGE	public	ERX2608522	Illumina HiSeq 3000	Illumina HiSeq	AUT.70_4	PAIRED	RANDOM	METAGENOMIC	wastewater metagenome	ILLUMINA	2019-02-08T00:00:00Z	SAMEA4527602	ERP015409	fastq,sra	ena,gs,ncbi,s3	ena,gs.US,ncbi.public,s3.us-east-1	3075013613	Austria	Europe	2016-02-04				Austria		48.2082	16.3738	2019-01-31	2019-01-31	2018-11-16	2018-05-22	SAMEA4527602	DTU	Technical University of Denmark	2019-01-31T17:02:41Z	2018-05-22T22:21:00Z	public	AUS.70	AUS.70	Austria	48.2082? N	16.3738? E	Centre for Genomic Epidemiology	metagenome	wastewater treatment plant
ERR1713334	WGS	PRJEB13831	SAMEA4527602	DTU	public	ERX1783568	Illumina HiSeq 3000	Illumina HiSeq	AUT.70	PAIRED	RANDOM	METAGENOMIC	wastewater metagenome	ILLUMINA	2019-02-08T00:00:00Z	SAMEA4527602	ERP015409	fastq,sra	ena,gs,ncbi,s3	ena,gs.US,ncbi.public,s3.us-east-1	2769738188	Austria	Europe	2016-02-04	302	6552655268		Austria		48.2082	16.3738	2019-01-31	2019-01-31	2018-11-16	2018-05-22	SAMEA4527602	DTU	Technical University of Denmark	2019-01-31T17:02:41Z	2018-05-22T22:21:00Z	public	AUS.70	AUS.70	Austria	48.2082? N	16.3738? E	Centre for Genomic Epidemiology	metagenome	wastewater treatment plant
ERR1725945	WGS	PRJEB13831	SAMEA4527602	DTU	public	ERX1795930	Illumina HiSeq 3000	Illumina HiSeq	AUT.70_2	PAIRED	RANDOM	METAGENOMIC	wastewater metagenome	ILLUMINA	2019-02-08T00:00:00Z	SAMEA4527602	ERP015409	fastq,sra	ena,gs,ncbi,s3	ena,gs.US,ncbi.public,s3.us-east-1	1801930896	Austria	Europe	2016-02-04	302	4129371330		Austria		48.2082	16.3738	2019-01-31	2019-01-31	2018-11-16	2018-05-22	SAMEA4527602	DTU	Technical University of Denmark	2019-01-31T17:02:41Z	2018-05-22T22:21:00Z	public	AUS.70	AUS.70	Austria	48.2082? N	16.3738? E	Centre for Genomic Epidemiology	metagenome	wastewater treatment plant
ERR1725946	WGS	PRJEB13831	SAMEA4527602	DTU	public	ERX1795931	Illumina HiSeq 3000	Illumina HiSeq	AUT.70_3	PAIRED	RANDOM	METAGENOMIC	wastewater metagenome	ILLUMINA	2019-02-08T00:00:00Z	SAMEA4527602	ERP015409	fastq,sra	ena,gs,ncbi,s3	ena,gs.US,ncbi.public,s3.us-east-1	803370760	Austria	Europe	2016-02-04	302	1745781668		Austria		48.2082	16.3738	2019-01-31	2019-01-31	2018-11-16	2018-05-22	SAMEA4527602	DTU	Technical University of Denmark	2019-01-31T17:02:41Z	2018-05-22T22:21:00Z	public	AUS.70	AUS.70	Austria	48.2082? N	16.3738? E	Centre for Genomic Epidemiology	metagenome	wastewater treatment plant
ERR2200443	WGS	PRJEB23496	SAMEA4527602	ERASMUS MC, UNIVERISTY MEDICAL CENTER	public	ERX2255431	Ion Torrent S5 XL	Ion Torrent S5 XL	Ion Xpress‚Ñ¢ Plus Fragment Library Kit	SINGLE	RANDOM	METAGENOMIC	wastewater metagenome	ION_TORRENT	2020-05-30T00:00:00Z	SAMEA4527602	ERP105254	sra	gs,ncbi,s3	gs.US,ncbi.public,s3.us-east-1	646611187	Austria	Europe	2016-02-04				Austria		48.2082	16.3738	2020-05-29	2019-01-31	2018-11-16	2018-05-22	SAMEA4527602	DTU	Technical University of Denmark	2019-01-31T17:02:41Z	2018-05-22T22:21:00Z	public	AUS.70	AUS.70	Austria	48.2082? N	16.3738? E	Centre for Genomic Epidemiology	metagenome	wastewater treatment plant
ERR2607384	WGS	PRJEB27054	SAMEA4700705	CENTRE FOR GENOMIC EPIDEMIOLOGY, NATIONAL FOOD INS	public	ERX2624040	Illumina HiSeq 3000		unspecified	PAIRED	RANDOM	METAGENOMIC	wastewater metagenome	ILLUMINA	2018-07-03T00:00:00Z	SAMEA4700705	ERP109094	fastq,sra	gs,ncbi,ena,s3	ncbi.public,ena,s3.us-east-1,gs.US	1806173633	Austria	Europe	2016-04-02	302	4139280252		Austria		48.174	16.4632	2018-06-14	2018-06-14	2018-11-16	2018-05-31	SAMEA4700705	DTU-GE	Centre for Genomic Epidemiology\, National Food Institute\, Technical University of Denmark (DTU)\, Denmark	2018-06-14T17:03:25Z	2018-05-31T13:35:05Z	public	AUT-70_1	AUT-70_1		48.174	16.4632	Centre for Genomic Epidemiology
ERR2607385	WGS	PRJEB27054	SAMEA4700706	CENTRE FOR GENOMIC EPIDEMIOLOGY, NATIONAL FOOD INS	public	ERX2624041	Illumina HiSeq 3000		unspecified	PAIRED	RANDOM	METAGENOMIC	wastewater metagenome	ILLUMINA	2018-07-03T00:00:00Z	SAMEA4700706	ERP109094	fastq,sra	ena,ncbi,s3,gs	ncbi.public,ena,gs.US,s3.us-east-1	805152509	Austria	Europe	2016-04-02	302	1749773806		Austria		48.174	16.4632	2018-06-14	2018-06-14	2018-11-16	2018-05-31	SAMEA4700706	DTU-GE	Centre for Genomic Epidemiology\, National Food Institute\, Technical University of Denmark (DTU)\, Denmark	2018-06-14T17:03:25Z	2018-05-31T13:35:05Z	public	AUT-70_2	AUT-70_2		48.174	16.4632	Centre for Genomic Epidemiology
ERR2607386	WGS	PRJEB27054	SAMEA4700707	CENTRE FOR GENOMIC EPIDEMIOLOGY, NATIONAL FOOD INS	public	ERX2624042	Illumina HiSeq 3000		unspecified	PAIRED	RANDOM	METAGENOMIC	wastewater metagenome	ILLUMINA	2018-07-03T00:00:00Z	SAMEA4700707	ERP109094	sra,fastq	s3,ncbi,gs,ena	ena,s3.us-east-1,gs.US,ncbi.public	3053755143	Austria	Europe	2016-04-02	302	6053198910		Austria		48.174	16.4632	2018-06-14	2018-06-14	2018-11-16	2018-05-31	SAMEA4700707	DTU-GE	Centre for Genomic Epidemiology\, National Food Institute\, Technical University of Denmark (DTU)\, Denmark	2018-06-14T17:03:25Z	2018-05-31T13:35:05Z	public	AUT-70_3	AUT-70_3		48.174	16.4632	Centre for Genomic Epidemiology
ERR2607387	WGS	PRJEB27054	SAMEA4700708	CENTRE FOR GENOMIC EPIDEMIOLOGY, NATIONAL FOOD INS	public	ERX2624043	Illumina HiSeq 3000		unspecified	PAIRED	RANDOM	METAGENOMIC	wastewater metagenome	ILLUMINA	2018-07-03T00:00:00Z	SAMEA4700708	ERP109094	fastq,sra	gs,ncbi,ena,s3	gs.US,ncbi.public,s3.us-east-1,ena	2777401271	Austria	Europe	2016-04-02	302	6571173304		Austria		48.174	16.4632	2018-06-14	2018-06-14	2018-11-16	2018-05-31	SAMEA4700708	DTU-GE	Centre for Genomic Epidemiology\, National Food Institute\, Technical University of Denmark (DTU)\, Denmark	2018-06-14T17:03:25Z	2018-05-31T13:35:05Z	public	AUT-70	AUT-70		48.174	16.4632	Centre for Genomic Epidemiology
ERR2683226	WGS	PRJEB27621	SAMEA4777483	CENTRE FOR GENOMIC EPIDEMIOLOGY, NATIONAL FOOD INS	public	ERX2697840	Illumina NovaSeq 6000		unspecified	PAIRED	RANDOM	METAGENOMIC	wastewater metagenome	ILLUMINA	2020-07-02T00:00:00Z	SAMEA4777483	ERP109726	sra	s3,ncbi,gs	s3.us-east-1,ncbi.public,gs.US	2520814485	Austria	Europe	2017-06-07				Austria		48.174	16.4632	2020-07-01	2020-07-01	2018-11-16	2018-07-04	SAMEA4777483	DTU-GE	Centre for Genomic Epidemiology\, National Food Institute\, Technical University of Denmark (DTU)\, Denmark	2020-07-01T04:04:01Z	2018-07-04T17:53:43Z	public	DTU2017_MG_50_AT_VI	DTU2017_MG_50_AT_VI		48.174	16.4632	Centre for Genomic Epidemiology
ERR4682334	WGS	PRJEB40815	SAMEA7428241	CENTRE FOR GENOMIC EPIDEMIOLOGY, NATIONAL FOOD INS	public	ERX4603786	Illumina NovaSeq 6000		unspecified	PAIRED	RANDOM	METAGENOMIC	wastewater metagenome	ILLUMINA	2021-06-25T00:00:00Z	SAMEA7428241	ERP124492	sra,fastq	gs,s3,ncbi	ncbi.public,gs.US,s3.us-east-1	5548196979	Austria	Europe	2017-11-21	302	17114703306		Austria		48.174	16.4632	2021-06-24	2021-06-24	2021-06-24	2021-06-24	SAMEA7428241	DTU-GE	Centre for Genomic Epidemiology\, National Food Institute\, Technical University of Denmark (DTU)\, Denmark	2021-06-24T12:26:19Z	2021-06-24T12:26:19Z	public	DTU_2017_493_1_MG_AT_VI_189	DTU_2017_493_1_MG_AT_VI_189				Centre for Genomic Epidemiology
ERR4682791	WGS	PRJEB40816	SAMEA7428433	CENTRE FOR GENOMIC EPIDEMIOLOGY, NATIONAL FOOD INS	public	ERX4604240	Illumina NovaSeq 6000		unspecified	PAIRED	RANDOM	METAGENOMIC	wastewater metagenome	ILLUMINA	2021-06-25T00:00:00Z	SAMEA7428433	ERP124493	sra,fastq	gs,ncbi,s3	ncbi.public,s3.us-east-1,gs.US	4891420241	Austria	Europe	2018-06-21	299	15178170052		Austria		48.174	16.4632	2021-06-24	2021-06-24	2021-06-24	2021-06-24	SAMEA7428433	DTU-GE	Centre for Genomic Epidemiology\, National Food Institute\, Technical University of Denmark (DTU)\, Denmark	2021-06-24T12:26:18Z	2021-06-24T12:26:18Z	public	DTU_2018_666_1_MG_AT_VI_354	DTU_2018_666_1_MG_AT_VI_354				Centre for Genomic Epidemiology
ERR4678558	WGS	PRJEB40798	SAMEA7426258	CENTRE FOR GENOMIC EPIDEMIOLOGY, NATIONAL FOOD INS	public	ERX4600182	Illumina NovaSeq 6000		unspecified	PAIRED	RANDOM	METAGENOMIC	wastewater metagenome	ILLUMINA	2021-06-25T00:00:00Z	SAMEA7426258	ERP124466	fastq,sra	gs,s3	gs.US,s3.us-east-1	3154345458	Austria	Europe	2018-11-08	302	10291380236		Austria		48.174	16.4632	2021-06-24	2021-06-24	2021-06-24	2021-06-24	SAMEA7426258	DTU-GE	Centre for Genomic Epidemiology\, National Food Institute\, Technical University of Denmark (DTU)\, Denmark	2021-06-24T12:26:12Z	2021-06-24T12:26:12Z	public	DTU_2018_799_1_MG_AT_VI_483	DTU_2018_799_1_MG_AT_VI_483				Centre for Genomic Epidemiology
ERR2683246	WGS	PRJEB27621	SAMEA4777503	CENTRE FOR GENOMIC EPIDEMIOLOGY, NATIONAL FOOD INS	public	ERX2697860	Illumina NovaSeq 6000		unspecified	PAIRED	RANDOM	METAGENOMIC	wastewater metagenome	ILLUMINA	2020-07-02T00:00:00Z	SAMEA4777503	ERP109726	sra	s3,ncbi,gs	ncbi.public,s3.us-east-1,gs.US	4051673638	Bangladesh	Asia	2017-06-14				Bangladesh		23.6834	90.4514	2020-07-01	2020-07-01	2018-11-16	2018-07-04	SAMEA4777503	DTU-GE	Centre for Genomic Epidemiology\, National Food Institute\, Technical University of Denmark (DTU)\, Denmark	2020-07-01T04:04:01Z	2018-07-04T17:53:44Z	public	DTU2017_MG_69_BD_DH	DTU2017_MG_69_BD_DH		23.6834	90.4514	Centre for Genomic Epidemiology
ERR4682420	WGS	PRJEB40815	SAMEA7428327	CENTRE FOR GENOMIC EPIDEMIOLOGY, NATIONAL FOOD INS	public	ERX4603872	Illumina NovaSeq 6000		unspecified	PAIRED	RANDOM	METAGENOMIC	wastewater metagenome	ILLUMINA	2021-06-25T00:00:00Z	SAMEA7428327	ERP124492	fastq,sra	s3,gs,ncbi	gs.US,s3.us-east-1,ncbi.public	4229895706	Bangladesh	Asia	2017-11-25	301	12852952598		Bangladesh		23.6834	90.4514	2021-06-24	2021-06-24	2021-06-24	2021-06-24	SAMEA7428327	DTU-GE	Centre for Genomic Epidemiology\, National Food Institute\, Technical University of Denmark (DTU)\, Denmark	2021-06-24T12:26:19Z	2021-06-24T12:26:19Z	public	DTU_2017_589_1_MG_BD_DH_285	DTU_2017_589_1_MG_BD_DH_285				Centre for Genomic Epidemiology
ERR4682869	WGS	PRJEB40816	SAMEA7428511	CENTRE FOR GENOMIC EPIDEMIOLOGY, NATIONAL FOOD INS	public	ERX4604318	Illumina NovaSeq 6000		unspecified	PAIRED	RANDOM	METAGENOMIC	wastewater metagenome	ILLUMINA	2021-06-24T00:00:00Z	SAMEA7428511	ERP124493	sra,fastq	ncbi,s3,gs	gs.US,s3.us-east-1,ncbi.public	4463353710	Bangladesh	Asia	2018-07-03	297	13739538725		Bangladesh		23.6834	90.4514	2021-06-24	2021-06-24	2021-06-24	2021-06-24	SAMEA7428511	DTU-GE	Centre for Genomic Epidemiology\, National Food Institute\, Technical University of Denmark (DTU)\, Denmark	2021-06-24T12:26:19Z	2021-06-24T12:26:19Z	public	DTU_2018_749_1_MG_BD_DH_446	DTU_2018_749_1_MG_BD_DH_446				Centre for Genomic Epidemiology
ERR4678629	WGS	PRJEB40798	SAMEA7426329	CENTRE FOR GENOMIC EPIDEMIOLOGY, NATIONAL FOOD INS	public	ERX4600253	Illumina NovaSeq 6000		unspecified	PAIRED	RANDOM	METAGENOMIC	wastewater metagenome	ILLUMINA	2021-06-25T00:00:00Z	SAMEA7426329	ERP124466	sra,fastq	s3,ncbi,gs	ncbi.public,s3.us-east-1,gs.US	4161317922	Bangladesh	Asia	2018-12-31	302	13472477908		Bangladesh		23.6834	90.4514	2021-06-24	2021-06-24	2021-06-24	2021-06-24	SAMEA7426329	DTU-GE	Centre for Genomic Epidemiology\, National Food Institute\, Technical University of Denmark (DTU)\, Denmark	2021-06-24T12:26:13Z	2021-06-24T12:26:13Z	public	DTU_2018_874_1_MG_BD_DH_558	DTU_2018_874_1_MG_BD_DH_558				Centre for Genomic Epidemiology
ERR2683241	WGS	PRJEB27621	SAMEA4777498	CENTRE FOR GENOMIC EPIDEMIOLOGY, NATIONAL FOOD INS	public	ERX2697855	Illumina NovaSeq 6000		unspecified	PAIRED	RANDOM	METAGENOMIC	wastewater metagenome	ILLUMINA	2020-07-02T00:00:00Z	SAMEA4777498	ERP109726	sra	ncbi,gs,s3	gs.US,s3.us-east-1,ncbi.public	5104590313	Barbados	North America	2017-06-15				Barbados		13.1008	-59.6212	2020-07-01	2020-07-01	2018-11-16	2018-07-04	SAMEA4777498	DTU-GE	Centre for Genomic Epidemiology\, National Food Institute\, Technical University of Denmark (DTU)\, Denmark	2020-07-01T04:04:01Z	2018-07-04T17:53:44Z	public	DTU2017_MG_64_BB_BR	DTU2017_MG_64_BB_BR		13.1008	-59.6212	Centre for Genomic Epidemiology
ERR2683242	WGS	PRJEB27621	SAMEA4777499	CENTRE FOR GENOMIC EPIDEMIOLOGY, NATIONAL FOOD INS	public	ERX2697856	Illumina NovaSeq 6000		unspecified	PAIRED	RANDOM	METAGENOMIC	wastewater metagenome	ILLUMINA	2020-07-02T00:00:00Z	SAMEA4777499	ERP109726	sra	gs,ncbi,s3	gs.US,ncbi.public,s3.us-east-1	6743206996	Barbados	North America	2017-06-15				Barbados		13.1489	-59.6247	2020-07-01	2020-07-01	2018-11-16	2018-07-04	SAMEA4777499	DTU-GE	Centre for Genomic Epidemiology\, National Food Institute\, Technical University of Denmark (DTU)\, Denmark	2020-07-01T04:04:01Z	2018-07-04T17:53:44Z	public	DTU2017_MG_65_BB_WO	DTU2017_MG_65_BB_WO		13.1489	-59.6247	Centre for Genomic Epidemiology
ERR4682387	WGS	PRJEB40815	SAMEA7428294	CENTRE FOR GENOMIC EPIDEMIOLOGY, NATIONAL FOOD INS	public	ERX4603839	Illumina NovaSeq 6000		unspecified	PAIRED	RANDOM	METAGENOMIC	wastewater metagenome	ILLUMINA	2021-06-25T00:00:00Z	SAMEA7428294	ERP124492	fastq,sra	ncbi,gs,s3	gs.US,ncbi.public,s3.us-east-1	4706335239	Barbados	North America	2017-11-23	302	14500752272		Barbados		13.0978	-59.6184	2021-06-24	2021-06-24	2021-06-24	2021-06-24	SAMEA7428294	DTU-GE	Centre for Genomic Epidemiology\, National Food Institute\, Technical University of Denmark (DTU)\, Denmark	2021-06-24T12:26:18Z	2021-06-24T12:26:18Z	public	DTU_2017_550_1_MG_BB_BR_246	DTU_2017_550_1_MG_BB_BR_246		13.0978	-59.6184	Centre for Genomic Epidemiology
ERR4682388	WGS	PRJEB40815	SAMEA7428295	CENTRE FOR GENOMIC EPIDEMIOLOGY, NATIONAL FOOD INS	public	ERX4603840	Illumina NovaSeq 6000		unspecified	PAIRED	RANDOM	METAGENOMIC	wastewater metagenome	ILLUMINA	2021-06-25T00:00:00Z	SAMEA7428295	ERP124492	sra,fastq	gs,ncbi,s3	ncbi.public,gs.US,s3.us-east-1	3867481799	Barbados	North America	2017-11-23	302	11964379904		Barbados		13.0709	-59.5807	2021-06-24	2021-06-24	2021-06-24	2021-06-24	SAMEA7428295	DTU-GE	Centre for Genomic Epidemiology\, National Food Institute\, Technical University of Denmark (DTU)\, Denmark	2021-06-24T12:26:18Z	2021-06-24T12:26:18Z	public	DTU_2017_551_1_MG_BB_WO_247	DTU_2017_551_1_MG_BB_WO_247		13.0709	-59.5807	Centre for Genomic Epidemiology
ERR4682835	WGS	PRJEB40816	SAMEA7428477	CENTRE FOR GENOMIC EPIDEMIOLOGY, NATIONAL FOOD INS	public	ERX4604284	Illumina NovaSeq 6000		unspecified	PAIRED	RANDOM	METAGENOMIC	wastewater metagenome	ILLUMINA	2021-06-25T00:00:00Z	SAMEA7428477	ERP124493	sra,fastq	ncbi,s3,gs	s3.us-east-1,gs.US,ncbi.public	4927428315	Barbados	North America	2018-07-05	298	15477845293		Barbados		13.0978	-59.6184	2021-06-24	2021-06-24	2021-06-24	2021-06-24	SAMEA7428477	DTU-GE	Centre for Genomic Epidemiology\, National Food Institute\, Technical University of Denmark (DTU)\, Denmark	2021-06-24T12:26:18Z	2021-06-24T12:26:18Z	public	DTU_2018_712_1_MG_BB_WO_409	DTU_2018_712_1_MG_BB_WO_409				Centre for Genomic Epidemiology
ERR4682836	WGS	PRJEB40816	SAMEA7428478	CENTRE FOR GENOMIC EPIDEMIOLOGY, NATIONAL FOOD INS	public	ERX4604285	Illumina NovaSeq 6000		unspecified	PAIRED	RANDOM	METAGENOMIC	wastewater metagenome	ILLUMINA	2021-06-25T00:00:00Z	SAMEA7428478	ERP124493	fastq,sra	s3,gs,ncbi	ncbi.public,gs.US,s3.us-east-1	5292251248	Barbados	North America	2018-07-05	296	16381960109		Barbados		13.0709	-59.5807	2021-06-24	2021-06-24	2021-06-24	2021-06-24	SAMEA7428478	DTU-GE	Centre for Genomic Epidemiology\, National Food Institute\, Technical University of Denmark (DTU)\, Denmark	2021-06-24T12:26:18Z	2021-06-24T12:26:18Z	public	DTU_2018_713_1_MG_BB_BR_410	DTU_2018_713_1_MG_BB_BR_410				Centre for Genomic Epidemiology
ERR4678643	WGS	PRJEB40798	SAMEA7426343	CENTRE FOR GENOMIC EPIDEMIOLOGY, NATIONAL FOOD INS	public	ERX4600267	Illumina NovaSeq 6000		unspecified	PAIRED	RANDOM	METAGENOMIC	wastewater metagenome	ILLUMINA	2021-06-25T00:00:00Z	SAMEA7426343	ERP124466	fastq,sra	gs,s3,ncbi	s3.us-east-1,ncbi.public,gs.US	3309391678	Barbados	North America	2018-12-21	302	10972464528		Barbados		13.0709	-59.5807	2021-06-24	2021-06-24	2021-06-24	2021-06-24	SAMEA7426343	DTU-GE	Centre for Genomic Epidemiology\, National Food Institute\, Technical University of Denmark (DTU)\, Denmark	2021-06-24T12:26:13Z	2021-06-24T12:26:13Z	public	DTU_2018_888_1_MG_BB_WO_575	DTU_2018_888_1_MG_BB_WO_575		13.0709	-59.5807	Centre for Genomic Epidemiology
ERR4678644	WGS	PRJEB40798	SAMEA7426344	CENTRE FOR GENOMIC EPIDEMIOLOGY, NATIONAL FOOD INS	public	ERX4600268	Illumina NovaSeq 6000		unspecified	PAIRED	RANDOM	METAGENOMIC	wastewater metagenome	ILLUMINA	2021-06-25T00:00:00Z	SAMEA7426344	ERP124466	fastq,sra	ncbi,s3,gs	ncbi.public,s3.us-east-1,gs.US	3987729430	Barbados	North America	2018-12-21	302	13278864802		Barbados		13.0978	-59.6184	2021-06-24	2021-06-24	2021-06-24	2021-06-24	SAMEA7426344	DTU-GE	Centre for Genomic Epidemiology\, National Food Institute\, Technical University of Denmark (DTU)\, Denmark	2021-06-24T12:26:13Z	2021-06-24T12:26:13Z	public	DTU_2018_889_1_MG_BB_BR_576	DTU_2018_889_1_MG_BB_BR_576		13.0978	-59.6184	Centre for Genomic Epidemiology
ERR4682345	WGS	PRJEB40815	SAMEA7428252	CENTRE FOR GENOMIC EPIDEMIOLOGY, NATIONAL FOOD INS	public	ERX4603797	Illumina NovaSeq 6000		unspecified	PAIRED	RANDOM	METAGENOMIC	wastewater metagenome	ILLUMINA	2021-06-25T00:00:00Z	SAMEA7428252	ERP124492	fastq,sra	ncbi,gs,s3	ncbi.public,gs.US,s3.us-east-1	5866863002	Belgium	Europe	2017-11-21	302	18155571070		Belgium		51.0538	3.72501	2021-06-24	2021-06-24	2021-06-24	2021-06-24	SAMEA7428252	DTU-GE	Centre for Genomic Epidemiology\, National Food Institute\, Technical University of Denmark (DTU)\, Denmark	2021-06-24T12:26:18Z	2021-06-24T12:26:18Z	public	DTU_2017_504_1_MG_BE_AN_200	DTU_2017_504_1_MG_BE_AN_200				Centre for Genomic Epidemiology
ERR4682343	WGS	PRJEB40815	SAMEA7428250	CENTRE FOR GENOMIC EPIDEMIOLOGY, NATIONAL FOOD INS	public	ERX4603795	Illumina NovaSeq 6000		unspecified	PAIRED	RANDOM	METAGENOMIC	wastewater metagenome	ILLUMINA	2021-06-25T00:00:00Z	SAMEA7428250	ERP124492	fastq,sra	ncbi,s3,gs	s3.us-east-1,gs.US,ncbi.public	4846321685	Belgium	Europe	2017-11-22	302	15005126096		Belgium		51.0538	3.72501	2021-06-24	2021-06-24	2021-06-24	2021-06-24	SAMEA7428250	DTU-GE	Centre for Genomic Epidemiology\, National Food Institute\, Technical University of Denmark (DTU)\, Denmark	2021-06-24T12:26:18Z	2021-06-24T12:26:18Z	public	DTU_2017_502_1_MG_BE_GE_198	DTU_2017_502_1_MG_BE_GE_198		51.0538	3.72501	Centre for Genomic Epidemiology
ERR4682344	WGS	PRJEB40815	SAMEA7428251	CENTRE FOR GENOMIC EPIDEMIOLOGY, NATIONAL FOOD INS	public	ERX4603796	Illumina NovaSeq 6000		unspecified	PAIRED	RANDOM	METAGENOMIC	wastewater metagenome	ILLUMINA	2021-06-25T00:00:00Z	SAMEA7428251	ERP124492	fastq,sra	s3,ncbi,gs	gs.US,s3.us-east-1,ncbi.public	3708688749	Belgium	Europe	2017-11-22	302	11551542582		Belgium		51.0538	3.72501	2021-06-24	2021-06-24	2021-06-24	2021-06-24	SAMEA7428251	DTU-GE	Centre for Genomic Epidemiology\, National Food Institute\, Technical University of Denmark (DTU)\, Denmark	2021-06-24T12:26:18Z	2021-06-24T12:26:18Z	public	DTU_2017_503_1_MG_BE_BR_199	DTU_2017_503_1_MG_BE_BR_199				Centre for Genomic Epidemiology
ERR4682346	WGS	PRJEB40815	SAMEA7428253	CENTRE FOR GENOMIC EPIDEMIOLOGY, NATIONAL FOOD INS	public	ERX4603798	Illumina NovaSeq 6000		unspecified	PAIRED	RANDOM	METAGENOMIC	wastewater metagenome	ILLUMINA	2021-06-25T00:00:00Z	SAMEA7428253	ERP124492	fastq,sra	gs,s3,ncbi	gs.US,s3.us-east-1,ncbi.public	5227753083	Belgium	Europe	2017-11-22	302	16005142622		Belgium		51.0538	3.72501	2021-06-24	2021-06-24	2021-06-24	2021-06-24	SAMEA7428253	DTU-GE	Centre for Genomic Epidemiology\, National Food Institute\, Technical University of Denmark (DTU)\, Denmark	2021-06-24T12:26:18Z	2021-06-24T12:26:18Z	public	DTU_2017_505_1_MG_BE_DE_201	DTU_2017_505_1_MG_BE_DE_201				Centre for Genomic Epidemiology
ERR4682398	WGS	PRJEB40815	SAMEA7428305	CENTRE FOR GENOMIC EPIDEMIOLOGY, NATIONAL FOOD INS	public	ERX4603850	Illumina NovaSeq 6000		unspecified	PAIRED	RANDOM	METAGENOMIC	wastewater metagenome	ILLUMINA	2021-06-25T00:00:00Z	SAMEA7428305	ERP124492	fastq,sra	ncbi,s3,gs	ncbi.public,s3.us-east-1,gs.US	2660538454	Belgium	Europe	2017-11-23	302	8342689298		Belgium		51.0538	3.72501	2021-06-24	2021-06-24	2021-06-24	2021-06-24	SAMEA7428305	DTU-GE	Centre for Genomic Epidemiology\, National Food Institute\, Technical University of Denmark (DTU)\, Denmark	2021-06-24T12:26:18Z	2021-06-24T12:26:18Z	public	DTU_2017_562_1_MG_BE_BR_258	DTU_2017_562_1_MG_BE_BR_258				Centre for Genomic Epidemiology
ERR4682783	WGS	PRJEB40816	SAMEA7428425	CENTRE FOR GENOMIC EPIDEMIOLOGY, NATIONAL FOOD INS	public	ERX4604232	Illumina NovaSeq 6000		unspecified	PAIRED	RANDOM	METAGENOMIC	wastewater metagenome	ILLUMINA	2021-06-25T00:00:00Z	SAMEA7428425	ERP124493	fastq,sra	ncbi,gs,s3	gs.US,s3.us-east-1,ncbi.public	4160866433	Belgium	Europe	2018-06-12	297	13104602329		Belgium		51.0538	3.72501	2021-06-24	2021-06-24	2021-06-24	2021-06-24	SAMEA7428425	DTU-GE	Centre for Genomic Epidemiology\, National Food Institute\, Technical University of Denmark (DTU)\, Denmark	2021-06-24T12:26:19Z	2021-06-24T12:26:19Z	public	DTU_2018_657_1_MG_BE_HA_345	DTU_2018_657_1_MG_BE_HA_345				Centre for Genomic Epidemiology
ERR4682781	WGS	PRJEB40816	SAMEA7428423	CENTRE FOR GENOMIC EPIDEMIOLOGY, NATIONAL FOOD INS	public	ERX4604230	Illumina NovaSeq 6000		unspecified	PAIRED	RANDOM	METAGENOMIC	wastewater metagenome	ILLUMINA	2021-06-25T00:00:00Z	SAMEA7428423	ERP124493	sra,fastq	gs,ncbi,s3	s3.us-east-1,gs.US,ncbi.public	3625472705	Belgium	Europe	2018-06-12	298	11320433568		Belgium		51.0538	3.72501	2021-06-24	2021-06-24	2021-06-24	2021-06-24	SAMEA7428423	DTU-GE	Centre for Genomic Epidemiology\, National Food Institute\, Technical University of Denmark (DTU)\, Denmark	2021-06-24T12:26:19Z	2021-06-24T12:26:19Z	public	DTU_2018_655_1_MG_BE_OS_343	DTU_2018_655_1_MG_BE_OS_343				Centre for Genomic Epidemiology
ERR4682782	WGS	PRJEB40816	SAMEA7428424	CENTRE FOR GENOMIC EPIDEMIOLOGY, NATIONAL FOOD INS	public	ERX4604231	Illumina NovaSeq 6000		unspecified	PAIRED	RANDOM	METAGENOMIC	wastewater metagenome	ILLUMINA	2021-06-25T00:00:00Z	SAMEA7428424	ERP124493	sra,fastq	ncbi,s3,gs	s3.us-east-1,gs.US,ncbi.public	3466344828	Belgium	Europe	2018-06-20	298	10870199425		Belgium		51.0538	3.72501	2021-06-24	2021-06-24	2021-06-24	2021-06-24	SAMEA7428424	DTU-GE	Centre for Genomic Epidemiology\, National Food Institute\, Technical University of Denmark (DTU)\, Denmark	2021-06-24T12:26:19Z	2021-06-24T12:26:19Z	public	DTU_2018_656_1_MG_BE_LE_344	DTU_2018_656_1_MG_BE_LE_344				Centre for Genomic Epidemiology
ERR4678605	WGS	PRJEB40798	SAMEA7426305	CENTRE FOR GENOMIC EPIDEMIOLOGY, NATIONAL FOOD INS	public	ERX4600229	Illumina NovaSeq 6000		unspecified	PAIRED	RANDOM	METAGENOMIC	wastewater metagenome	ILLUMINA	2021-06-25T00:00:00Z	SAMEA7426305	ERP124466	fastq,sra	ncbi,s3,gs	s3.us-east-1,ncbi.public,gs.US	3792204744	Belgium	Europe	2018-12-05	302	12401576546		Belgium		51.0538	3.72501	2021-06-24	2021-06-24	2021-06-24	2021-06-24	SAMEA7426305	DTU-GE	Centre for Genomic Epidemiology\, National Food Institute\, Technical University of Denmark (DTU)\, Denmark	2021-06-24T12:26:13Z	2021-06-24T12:26:13Z	public	DTU_2018_850_1_MG_BE_GH_534	DTU_2018_850_1_MG_BE_GH_534		51.0538	3.72501	Centre for Genomic Epidemiology
ERR4678604	WGS	PRJEB40798	SAMEA7426304	CENTRE FOR GENOMIC EPIDEMIOLOGY, NATIONAL FOOD INS	public	ERX4600228	Illumina NovaSeq 6000		unspecified	PAIRED	RANDOM	METAGENOMIC	wastewater metagenome	ILLUMINA	2021-06-25T00:00:00Z	SAMEA7426304	ERP124466	fastq,sra	s3,gs,ncbi	ncbi.public,gs.US,s3.us-east-1	3508717676	Belgium	Europe	2018-12-05	302	11487744176		Belgium		51.0538	3.72501	2021-06-24	2021-06-24	2021-06-24	2021-06-24	SAMEA7426304	DTU-GE	Centre for Genomic Epidemiology\, National Food Institute\, Technical University of Denmark (DTU)\, Denmark	2021-06-24T12:26:13Z	2021-06-24T12:26:13Z	public	DTU_2018_849_1_MG_BE_DE_533	DTU_2018_849_1_MG_BE_DE_533				Centre for Genomic Epidemiology
ERR4678603	WGS	PRJEB40798	SAMEA7426303	CENTRE FOR GENOMIC EPIDEMIOLOGY, NATIONAL FOOD INS	public	ERX4600227	Illumina NovaSeq 6000		unspecified	PAIRED	RANDOM	METAGENOMIC	wastewater metagenome	ILLUMINA	2021-06-25T00:00:00Z	SAMEA7426303	ERP124466	sra,fastq	s3,ncbi,gs	gs.US,ncbi.public,s3.us-east-1	3847058674	Belgium	Europe	2018-12-05	302	12436565964		Belgium		51.0538	3.72501	2021-06-24	2021-06-24	2021-06-24	2021-06-24	SAMEA7426303	DTU-GE	Centre for Genomic Epidemiology\, National Food Institute\, Technical University of Denmark (DTU)\, Denmark	2021-06-24T12:26:13Z	2021-06-24T12:26:13Z	public	DTU_2018_848_1_MG_BE_BRU_532	DTU_2018_848_1_MG_BE_BRU_532				Centre for Genomic Epidemiology
ERR4678601	WGS	PRJEB40798	SAMEA7426301	CENTRE FOR GENOMIC EPIDEMIOLOGY, NATIONAL FOOD INS	public	ERX4600225	Illumina NovaSeq 6000		unspecified	PAIRED	RANDOM	METAGENOMIC	wastewater metagenome	ILLUMINA	2021-06-25T00:00:00Z	SAMEA7426301	ERP124466	sra,fastq	ncbi,gs,s3	s3.us-east-1,ncbi.public,gs.US	3526807438	Belgium	Europe	2018-12-09	302	11481469220		Belgium		51.0538	3.72501	2021-06-24	2021-06-24	2021-06-24	2021-06-24	SAMEA7426301	DTU-GE	Centre for Genomic Epidemiology\, National Food Institute\, Technical University of Denmark (DTU)\, Denmark	2021-06-24T12:26:13Z	2021-06-24T12:26:13Z	public	DTU_2018_846_1_MG_BE_OS_530	DTU_2018_846_1_MG_BE_OS_530				Centre for Genomic Epidemiology
ERR4678602	WGS	PRJEB40798	SAMEA7426302	CENTRE FOR GENOMIC EPIDEMIOLOGY, NATIONAL FOOD INS	public	ERX4600226	Illumina NovaSeq 6000		unspecified	PAIRED	RANDOM	METAGENOMIC	wastewater metagenome	ILLUMINA	2021-06-25T00:00:00Z	SAMEA7426302	ERP124466	fastq,sra	ncbi,s3,gs	s3.us-east-1,gs.US,ncbi.public	3982046331	Belgium	Europe	2018-12-12	302	12990515202		Belgium		51.0538	3.72501	2021-06-24	2021-06-24	2021-06-24	2021-06-24	SAMEA7426302	DTU-GE	Centre for Genomic Epidemiology\, National Food Institute\, Technical University of Denmark (DTU)\, Denmark	2021-06-24T12:26:13Z	2021-06-24T12:26:13Z	public	DTU_2018_847_1_MG_BE_LE_531	DTU_2018_847_1_MG_BE_LE_531				Centre for Genomic Epidemiology
ERR4682357	WGS	PRJEB40815	SAMEA7428264	CENTRE FOR GENOMIC EPIDEMIOLOGY, NATIONAL FOOD INS	public	ERX4603809	Illumina NovaSeq 6000		unspecified	PAIRED	RANDOM	METAGENOMIC	wastewater metagenome	ILLUMINA	2021-06-25T00:00:00Z	SAMEA7428264	ERP124492	sra,fastq	s3,gs,ncbi	gs.US,s3.us-east-1,ncbi.public	3499187762	Benin	Africa	2017-11-11	302	10802758346		Benin		9.3077	2.3158	2021-06-24	2021-06-24	2021-06-24	2021-06-24	SAMEA7428264	DTU-GE	Centre for Genomic Epidemiology\, National Food Institute\, Technical University of Denmark (DTU)\, Denmark	2021-06-24T12:26:18Z	2021-06-24T12:26:18Z	public	DTU_2017_519_1_MG_BJ_SB_215	DTU_2017_519_1_MG_BJ_SB_215				Centre for Genomic Epidemiology
ERR4682867	WGS	PRJEB40816	SAMEA7428509	CENTRE FOR GENOMIC EPIDEMIOLOGY, NATIONAL FOOD INS	public	ERX4604316	Illumina NovaSeq 6000		unspecified	PAIRED	RANDOM	METAGENOMIC	wastewater metagenome	ILLUMINA	2021-06-24T00:00:00Z	SAMEA7428509	ERP124493	sra,fastq	gs,ncbi,s3	gs.US,s3.us-east-1,ncbi.public	3998242394	Benin	Africa	2018-08-22	299	12382388853		Benin		9.3077	2.3158	2021-06-24	2021-06-24	2021-06-24	2021-06-24	SAMEA7428509	DTU-GE	Centre for Genomic Epidemiology\, National Food Institute\, Technical University of Denmark (DTU)\, Denmark	2021-06-24T12:26:19Z	2021-06-24T12:26:19Z	public	DTU_2018_747_1_MG_BJ_DJ_444	DTU_2018_747_1_MG_BJ_DJ_444				Centre for Genomic Epidemiology
ERR4678625	WGS	PRJEB40798	SAMEA7426325	CENTRE FOR GENOMIC EPIDEMIOLOGY, NATIONAL FOOD INS	public	ERX4600249	Illumina NovaSeq 6000		unspecified	PAIRED	RANDOM	METAGENOMIC	wastewater metagenome	ILLUMINA	2021-06-25T00:00:00Z	SAMEA7426325	ERP124466	sra,fastq	gs,ncbi,s3	gs.US,s3.us-east-1,ncbi.public	3089647190	Bolivia	South America	2019-01-15	302	10023260710		Bolivia		9.3077	2.3158	2021-06-24	2021-06-24	2021-06-24	2021-06-24	SAMEA7426325	DTU-GE	Centre for Genomic Epidemiology\, National Food Institute\, Technical University of Denmark (DTU)\, Denmark	2021-06-24T12:26:13Z	2021-06-24T12:26:13Z	public	DTU_2018_870_1_MG_BO_LP_554	DTU_2018_870_1_MG_BO_LP_554				Centre for Genomic Epidemiology
ERR2683256	WGS	PRJEB27621	SAMEA4777513	CENTRE FOR GENOMIC EPIDEMIOLOGY, NATIONAL FOOD INS	public	ERX2697870	Illumina NovaSeq 6000		unspecified	PAIRED	RANDOM	METAGENOMIC	wastewater metagenome	ILLUMINA	2020-07-02T00:00:00Z	SAMEA4777513	ERP109726	sra	ncbi,s3,gs	ncbi.public,s3.us-east-1,gs.US	5279918544	Bosnia and Herzegovina	Europe	2017-06-13				Bosnia and Herzegovina		44.7703	17.2083	2020-07-01	2020-07-01	2018-11-16	2018-07-04	SAMEA4777513	DTU-GE	Centre for Genomic Epidemiology\, National Food Institute\, Technical University of Denmark (DTU)\, Denmark	2020-07-01T04:04:01Z	2018-07-04T17:53:44Z	public	DTU2017_MG_78_BA_BL	DTU2017_MG_78_BA_BL		44.7703	17.2083	Centre for Genomic Epidemiology
ERR4682354	WGS	PRJEB40815	SAMEA7428261	CENTRE FOR GENOMIC EPIDEMIOLOGY, NATIONAL FOOD INS	public	ERX4603806	Illumina NovaSeq 6000		unspecified	PAIRED	RANDOM	METAGENOMIC	wastewater metagenome	ILLUMINA	2021-06-25T00:00:00Z	SAMEA7428261	ERP124492	fastq,sra	gs,s3,ncbi	ncbi.public,gs.US,s3.us-east-1	5104377280	Bosnia and Herzegovina	Europe	2017-11-21	302	15737054806		Bosnia and Herzegovina		44.7703	17.2083	2021-06-24	2021-06-24	2021-06-24	2021-06-24	SAMEA7428261	DTU-GE	Centre for Genomic Epidemiology\, National Food Institute\, Technical University of Denmark (DTU)\, Denmark	2021-06-24T12:26:18Z	2021-06-24T12:26:18Z	public	DTU_2017_513_1_MG_BA_BL_209	DTU_2017_513_1_MG_BA_BL_209				Centre for Genomic Epidemiology
ERR4682792	WGS	PRJEB40816	SAMEA7428434	CENTRE FOR GENOMIC EPIDEMIOLOGY, NATIONAL FOOD INS	public	ERX4604241	Illumina NovaSeq 6000		unspecified	PAIRED	RANDOM	METAGENOMIC	wastewater metagenome	ILLUMINA	2021-06-25T00:00:00Z	SAMEA7428434	ERP124493	fastq,sra	gs,ncbi,s3	s3.us-east-1,ncbi.public,gs.US	4450001263	Bosnia and Herzegovina	Europe	2018-06-27	298	13908563473		Bosnia and Herzegovina		44.7703	17.2083	2021-06-24	2021-06-24	2021-06-24	2021-06-24	SAMEA7428434	DTU-GE	Centre for Genomic Epidemiology\, National Food Institute\, Technical University of Denmark (DTU)\, Denmark	2021-06-24T12:26:18Z	2021-06-24T12:26:18Z	public	DTU_2018_667_1_MG_BA_BL_355	DTU_2018_667_1_MG_BA_BL_355				Centre for Genomic Epidemiology
ERR4678632	WGS	PRJEB40798	SAMEA7426332	CENTRE FOR GENOMIC EPIDEMIOLOGY, NATIONAL FOOD INS	public	ERX4600256	Illumina NovaSeq 6000		unspecified	PAIRED	RANDOM	METAGENOMIC	wastewater metagenome	ILLUMINA	2021-06-25T00:00:00Z	SAMEA7426332	ERP124466	sra,fastq	gs,s3,ncbi	s3.us-east-1,gs.US,ncbi.public	4541859569	Bosnia and Herzegovina	Europe	2018-12-10	302	14831557636		Bosnia and Herzegovina		44.7703	17.2083	2021-06-24	2021-06-24	2021-06-24	2021-06-24	SAMEA7426332	DTU-GE	Centre for Genomic Epidemiology\, National Food Institute\, Technical University of Denmark (DTU)\, Denmark	2021-06-24T12:26:13Z	2021-06-24T12:26:13Z	public	DTU_2018_877_1_MG_BA_BL_562	DTU_2018_877_1_MG_BA_BL_562				Centre for Genomic Epidemiology
ERR1713338	WGS	PRJEB13831	SAMEA4527606	DTU	public	ERX1783572	Illumina HiSeq 3000	Illumina HiSeq	BWA.19	PAIRED	RANDOM	METAGENOMIC	wastewater metagenome	ILLUMINA	2019-02-08T00:00:00Z	SAMEA4527606	ERP015409	fastq,sra	ena,gs,ncbi,s3	ena,gs.US,ncbi.public,s3.us-east-1	2630284557	Botswana	Africa	2016-01-25	302	6227185338				-22.5515	27.1147	2019-01-31	2019-01-31	2018-11-16	2016-10-31	SAMEA4527606	DTU	Technical University of Denmark	2019-01-31T17:02:41Z	2016-10-31T11:12:16Z	public	BWA.19	BWA.19	Botswana	22.5515? S	27.1147? E	Centre for Genomic Epidemiology	metagenome	wastewater treatment plant
ERR1725952	WGS	PRJEB13831	SAMEA4527606	DTU	public	ERX1795937	Illumina HiSeq 3000	Illumina HiSeq	BWA.19_2	PAIRED	RANDOM	METAGENOMIC	wastewater metagenome	ILLUMINA	2019-02-08T00:00:00Z	SAMEA4527606	ERP015409	fastq,sra	ena,gs,ncbi,s3	ena,gs.US,ncbi.public,s3.us-east-1	184369014	Botswana	Africa	2016-01-25						-22.5515	27.1147	2019-01-31	2019-01-31	2018-11-16	2016-10-31	SAMEA4527606	DTU	Technical University of Denmark	2019-01-31T17:02:41Z	2016-10-31T11:12:16Z	public	BWA.19	BWA.19	Botswana	22.5515? S	27.1147? E	Centre for Genomic Epidemiology	metagenome	wastewater treatment plant
ERR1725953	WGS	PRJEB13831	SAMEA4527606	DTU	public	ERX1795938	Illumina HiSeq 3000	Illumina HiSeq	BWA.19_3	PAIRED	RANDOM	METAGENOMIC	wastewater metagenome	ILLUMINA	2019-02-08T00:00:00Z	SAMEA4527606	ERP015409	fastq,sra	ena,gs,ncbi,s3	ena,gs.US,ncbi.public,s3.us-east-1	791790926	Botswana	Africa	2016-01-25						-22.5515	27.1147	2019-01-31	2019-01-31	2018-11-16	2016-10-31	SAMEA4527606	DTU	Technical University of Denmark	2019-01-31T17:02:41Z	2016-10-31T11:12:16Z	public	BWA.19	BWA.19	Botswana	22.5515? S	27.1147? E	Centre for Genomic Epidemiology	metagenome	wastewater treatment plant
ERR2592249	WGS	PRJEB13831	SAMEA4527606	DTU CGE	public	ERX2608525	Illumina HiSeq 3000	Illumina HiSeq	BWA.19_4	PAIRED	RANDOM	METAGENOMIC	wastewater metagenome	ILLUMINA	2019-02-08T00:00:00Z	SAMEA4527606	ERP015409	fastq,sra	ena,gs,ncbi,s3	ena,gs.US,ncbi.public,s3.us-east-1	3293052597	Botswana	Africa	2016-01-25	302	6411560264				-22.5515	27.1147	2019-01-31	2019-01-31	2018-11-16	2016-10-31	SAMEA4527606	DTU	Technical University of Denmark	2019-01-31T17:02:41Z	2016-10-31T11:12:16Z	public	BWA.19	BWA.19	Botswana	22.5515? S	27.1147? E	Centre for Genomic Epidemiology	metagenome	wastewater treatment plant
ERR2200452	WGS	PRJEB23496	SAMEA4527606	ERASMUS MC, UNIVERISTY MEDICAL CENTER	public	ERX2255440	Ion Torrent S5 XL	Ion Torrent S5 XL	Ion Xpress‚Ñ¢ Plus Fragment Library Kit	SINGLE	RANDOM	METAGENOMIC	wastewater metagenome	ION_TORRENT	2020-05-30T00:00:00Z	SAMEA4527606	ERP105254	sra	gs,ncbi,s3	gs.US,ncbi.public,s3.us-east-1	1214294752	Botswana	Africa	2016-01-25						-22.5515	27.1147	2020-05-29	2019-01-31	2018-11-16	2016-10-31	SAMEA4527606	DTU	Technical University of Denmark	2019-01-31T17:02:41Z	2016-10-31T11:12:16Z	public	BWA.19	BWA.19	Botswana	22.5515? S	27.1147? E	Centre for Genomic Epidemiology	metagenome	wastewater treatment plant
ERR2607398	WGS	PRJEB27054	SAMEA4700719	CENTRE FOR GENOMIC EPIDEMIOLOGY, NATIONAL FOOD INS	public	ERX2624054	Illumina HiSeq 3000		unspecified	PAIRED	RANDOM	METAGENOMIC	wastewater metagenome	ILLUMINA	2018-07-03T00:00:00Z	SAMEA4700719	ERP109094	sra,fastq	s3,ena,gs,ncbi	ena,gs.US,ncbi.public,s3.us-east-1	184489085	Botswana	Africa	2016-01-25	302	396821960		Botswana		-24.6119	25.9647	2018-06-14	2018-06-14	2018-11-16	2018-05-31	SAMEA4700719	DTU-GE	Centre for Genomic Epidemiology\, National Food Institute\, Technical University of Denmark (DTU)\, Denmark	2018-06-14T17:03:25Z	2018-05-31T13:35:05Z	public	BWA-19_1	BWA-19_1		-24.6119	25.9647	Centre for Genomic Epidemiology
ERR2607399	WGS	PRJEB27054	SAMEA4700720	CENTRE FOR GENOMIC EPIDEMIOLOGY, NATIONAL FOOD INS	public	ERX2624055	Illumina HiSeq 3000		unspecified	PAIRED	RANDOM	METAGENOMIC	wastewater metagenome	ILLUMINA	2018-07-03T00:00:00Z	SAMEA4700720	ERP109094	fastq,sra	s3,ena,ncbi,gs	s3.us-east-1,gs.US,ena,ncbi.public	785895939	Botswana	Africa	2016-01-25	302	1654690616		Botswana		-24.6119	25.9647	2018-06-14	2018-06-14	2018-11-16	2018-05-31	SAMEA4700720	DTU-GE	Centre for Genomic Epidemiology\, National Food Institute\, Technical University of Denmark (DTU)\, Denmark	2018-06-14T17:03:25Z	2018-05-31T13:35:05Z	public	BWA-19_2	BWA-19_2		-24.6119	25.9647	Centre for Genomic Epidemiology
ERR2607400	WGS	PRJEB27054	SAMEA4700721	CENTRE FOR GENOMIC EPIDEMIOLOGY, NATIONAL FOOD INS	public	ERX2624056	Illumina HiSeq 3000		unspecified	PAIRED	RANDOM	METAGENOMIC	wastewater metagenome	ILLUMINA	2018-07-03T00:00:00Z	SAMEA4700721	ERP109094	sra,fastq	ena,ncbi,gs,s3	gs.US,s3.us-east-1,ena,ncbi.public	3293052611	Botswana	Africa	2016-01-25	302	6411560264		Botswana		-24.6119	25.9647	2018-06-14	2018-06-14	2018-11-16	2018-05-31	SAMEA4700721	DTU-GE	Centre for Genomic Epidemiology\, National Food Institute\, Technical University of Denmark (DTU)\, Denmark	2018-06-14T17:03:25Z	2018-05-31T13:35:05Z	public	BWA-19_3	BWA-19_3		-24.6119	25.9647	Centre for Genomic Epidemiology
ERR2607401	WGS	PRJEB27054	SAMEA4700722	CENTRE FOR GENOMIC EPIDEMIOLOGY, NATIONAL FOOD INS	public	ERX2624057	Illumina HiSeq 3000		unspecified	PAIRED	RANDOM	METAGENOMIC	wastewater metagenome	ILLUMINA	2018-07-03T00:00:00Z	SAMEA4700722	ERP109094	fastq,sra	ena,s3,ncbi,gs	ena,gs.US,s3.us-east-1,ncbi.public	2630842868	Botswana	Africa	2016-01-25	302	6228507796		Botswana		-24.6119	25.9647	2018-06-14	2018-06-14	2018-11-16	2018-05-31	SAMEA4700722	DTU-GE	Centre for Genomic Epidemiology\, National Food Institute\, Technical University of Denmark (DTU)\, Denmark	2018-06-14T17:03:25Z	2018-05-31T13:35:05Z	public	BWA-19	BWA-19		-24.6119	25.9647	Centre for Genomic Epidemiology
ERR2683272	WGS	PRJEB27621	SAMEA4777529	CENTRE FOR GENOMIC EPIDEMIOLOGY, NATIONAL FOOD INS	public	ERX2697886	Illumina NovaSeq 6000		unspecified	PAIRED	RANDOM	METAGENOMIC	wastewater metagenome	ILLUMINA	2020-07-02T00:00:00Z	SAMEA4777529	ERP109726	sra	gs,s3,ncbi	s3.us-east-1,ncbi.public,gs.US	4483853667	Botswana	Africa	2017-06-09				Botswana		-24.6074	25.9635	2020-07-01	2020-07-01	2018-11-16	2018-07-04	SAMEA4777529	DTU-GE	Centre for Genomic Epidemiology\, National Food Institute\, Technical University of Denmark (DTU)\, Denmark	2020-07-01T04:04:01Z	2018-07-04T17:53:45Z	public	DTU2017_MG_92_BW_GA	DTU2017_MG_92_BW_GA		-24.6074	25.9635	Centre for Genomic Epidemiology
ERR4682411	WGS	PRJEB40815	SAMEA7428318	CENTRE FOR GENOMIC EPIDEMIOLOGY, NATIONAL FOOD INS	public	ERX4603863	Illumina NovaSeq 6000		unspecified	PAIRED	RANDOM	METAGENOMIC	wastewater metagenome	ILLUMINA	2021-06-25T00:00:00Z	SAMEA7428318	ERP124492	fastq,sra	gs,s3	gs.US,s3.us-east-1	4542165443	Botswana	Africa	2017-12-01	302	14277371026		Botswana		-22.5369	27.1235	2021-06-24	2021-06-24	2021-06-24	2021-06-24	SAMEA7428318	DTU-GE	Centre for Genomic Epidemiology\, National Food Institute\, Technical University of Denmark (DTU)\, Denmark	2021-06-24T12:26:18Z	2021-06-24T12:26:18Z	public	DTU_2017_580_1_MG_BW_GA_276	DTU_2017_580_1_MG_BW_GA_276				Centre for Genomic Epidemiology
ERR4682812	WGS	PRJEB40816	SAMEA7428454	CENTRE FOR GENOMIC EPIDEMIOLOGY, NATIONAL FOOD INS	public	ERX4604261	Illumina NovaSeq 6000		unspecified	PAIRED	RANDOM	METAGENOMIC	wastewater metagenome	ILLUMINA	2021-06-25T00:00:00Z	SAMEA7428454	ERP124493	fastq,sra	s3,ncbi,gs	gs.US,ncbi.public,s3.us-east-1	3895968866	Botswana	Africa	2018-07-31	298	12167096632		Botswana		-22.5369	27.1235	2021-06-24	2021-06-24	2021-06-24	2021-06-24	SAMEA7428454	DTU-GE	Centre for Genomic Epidemiology\, National Food Institute\, Technical University of Denmark (DTU)\, Denmark	2021-06-24T12:26:18Z	2021-06-24T12:26:18Z	public	DTU_2018_689_1_MG_BW_GA_377	DTU_2018_689_1_MG_BW_GA_377				Centre for Genomic Epidemiology
ERR4678621	WGS	PRJEB40798	SAMEA7426321	CENTRE FOR GENOMIC EPIDEMIOLOGY, NATIONAL FOOD INS	public	ERX4600245	Illumina NovaSeq 6000		unspecified	PAIRED	RANDOM	METAGENOMIC	wastewater metagenome	ILLUMINA	2021-06-25T00:00:00Z	SAMEA7426321	ERP124466	sra,fastq	s3,ncbi,gs	s3.us-east-1,gs.US,ncbi.public	3006253155	Botswana	Africa	2018-12-07	302	9857702498		Botswana		-22.5369	27.1235	2021-06-24	2021-06-24	2021-06-24	2021-06-24	SAMEA7426321	DTU-GE	Centre for Genomic Epidemiology\, National Food Institute\, Technical University of Denmark (DTU)\, Denmark	2021-06-24T12:26:13Z	2021-06-24T12:26:13Z	public	DTU_2018_866_1_MG_BW_GA_550	DTU_2018_866_1_MG_BW_GA_550		-22.5369	27.1235	Centre for Genomic Epidemiology
ERR4678595	WGS	PRJEB40798	SAMEA7426295	CENTRE FOR GENOMIC EPIDEMIOLOGY, NATIONAL FOOD INS	public	ERX4600219	Illumina NovaSeq 6000		unspecified	PAIRED	RANDOM	METAGENOMIC	wastewater metagenome	ILLUMINA	2021-06-25T00:00:00Z	SAMEA7426295	ERP124466	fastq,sra	gs,s3,ncbi	ncbi.public,s3.us-east-1,gs.US	2939431421	Brazil	South America	1905-07-10	302	9619302490		Brazil		-1.4558	-48.4902	2021-06-24	2021-06-24	2021-06-24	2021-06-24	SAMEA7426295	DTU-GE	Centre for Genomic Epidemiology\, National Food Institute\, Technical University of Denmark (DTU)\, Denmark	2021-06-24T12:26:13Z	2021-06-24T12:26:13Z	public	DTU_2018_837_1_MG_BR_RJ_521	DTU_2018_837_1_MG_BR_RJ_521				Centre for Genomic Epidemiology
ERR4682892	WGS	PRJEB40816	SAMEA7428534	CENTRE FOR GENOMIC EPIDEMIOLOGY, NATIONAL FOOD INS	public	ERX4604341	Illumina NovaSeq 6000		unspecified	PAIRED	RANDOM	METAGENOMIC	wastewater metagenome	ILLUMINA	2021-06-24T00:00:00Z	SAMEA7428534	ERP124493	sra,fastq	s3,ncbi,gs	s3.us-east-1,gs.US,ncbi.public	4893070459	Brazil	South America	2018	300	14796476196		Brazil		-1.4558	-48.4902	2021-06-24	2021-06-24	2021-06-24	2021-06-24	SAMEA7428534	DTU-GE	Centre for Genomic Epidemiology\, National Food Institute\, Technical University of Denmark (DTU)\, Denmark	2021-06-24T12:26:19Z	2021-06-24T12:26:19Z	public	DTU_2018_777_1_MG_BR_BE_474	DTU_2018_777_1_MG_BR_BE_474				Centre for Genomic Epidemiology
ERR1713337	WGS	PRJEB13831	SAMEA4527605	DTU	public	ERX1783571	Illumina HiSeq 3000	Illumina HiSeq	BRA.53a	PAIRED	RANDOM	METAGENOMIC	wastewater metagenome	ILLUMINA	2019-02-08T00:00:00Z	SAMEA4527605	ERP015409	fastq,sra	ena,gs,ncbi,s3	ena,gs.US,ncbi.public,s3.us-east-1	5151734139	Brazil	South America	2016-02-15	302	12230133864				-1.4558	-48.4902	2019-01-31	2019-01-31	2018-11-16	2016-10-31	SAMEA4527605	DTU	Technical University of Denmark	2019-01-31T17:02:41Z	2016-10-31T11:12:16Z	public	BRA.53a	BRA.53a	Brazil	1.4558? S	48.4902? W	Centre for Genomic Epidemiology	metagenome	wastewater treatment plant
ERR1725950	WGS	PRJEB13831	SAMEA4527605	DTU	public	ERX1795935	Illumina HiSeq 3000	Illumina HiSeq	BRA.53a_2	PAIRED	RANDOM	METAGENOMIC	wastewater metagenome	ILLUMINA	2019-02-08T00:00:00Z	SAMEA4527605	ERP015409	fastq,sra	ena,gs,ncbi,s3	ena,gs.US,ncbi.public,s3.us-east-1	4688044469	Brazil	South America	2016-02-15						-1.4558	-48.4902	2019-01-31	2019-01-31	2018-11-16	2016-10-31	SAMEA4527605	DTU	Technical University of Denmark	2019-01-31T17:02:41Z	2016-10-31T11:12:16Z	public	BRA.53a	BRA.53a	Brazil	1.4558? S	48.4902? W	Centre for Genomic Epidemiology	metagenome	wastewater treatment plant
ERR1725951	WGS	PRJEB13831	SAMEA4527605	DTU	public	ERX1795936	Illumina HiSeq 3000	Illumina HiSeq	BRA.53a_3	PAIRED	RANDOM	METAGENOMIC	wastewater metagenome	ILLUMINA	2019-02-08T00:00:00Z	SAMEA4527605	ERP015409	fastq,sra	ena,gs,ncbi,s3	ena,gs.US,ncbi.public,s3.us-east-1	2071707948	Brazil	South America	2016-02-15						-1.4558	-48.4902	2019-01-31	2019-01-31	2018-11-16	2016-10-31	SAMEA4527605	DTU	Technical University of Denmark	2019-01-31T17:02:41Z	2016-10-31T11:12:16Z	public	BRA.53a	BRA.53a	Brazil	1.4558? S	48.4902? W	Centre for Genomic Epidemiology	metagenome	wastewater treatment plant
ERR2322868	WGS	PRJEB23496	SAMEA4527605	ERASMUS MC, UNIVERISTY MEDICAL CENTER	public	ERX2373831	Ion Torrent S5 XL	Ion Torrent S5 XL	Ion Xpress‚Ñ¢ Plus Fragment Library Kit	SINGLE	RANDOM	METAGENOMIC	wastewater metagenome	ION_TORRENT	2020-05-30T00:00:00Z	SAMEA4527605	ERP105254	sra	gs,ncbi,s3	gs.US,ncbi.public,s3.us-east-1	1088540661	Brazil	South America	2016-02-15						-1.4558	-48.4902	2020-05-29	2019-01-31	2018-11-16	2016-10-31	SAMEA4527605	DTU	Technical University of Denmark	2019-01-31T17:02:41Z	2016-10-31T11:12:16Z	public	BRA.53a	BRA.53a	Brazil	1.4558? S	48.4902? W	Centre for Genomic Epidemiology	metagenome	wastewater treatment plant
ERR2607394	WGS	PRJEB27054	SAMEA4700715	CENTRE FOR GENOMIC EPIDEMIOLOGY, NATIONAL FOOD INS	public	ERX2624050	Illumina HiSeq 3000		unspecified	PAIRED	RANDOM	METAGENOMIC	wastewater metagenome	ILLUMINA	2018-07-03T00:00:00Z	SAMEA4700715	ERP109094	fastq,sra	ena,ncbi,s3,gs	ena,ncbi.public,s3.us-east-1,gs.US	4653693962	Brazil	South America	2016-02-15	302	10735060818		Brazil		-1.35673	-48.4454	2018-06-14	2018-06-14	2018-11-16	2018-05-31	SAMEA4700715	DTU-GE	Centre for Genomic Epidemiology\, National Food Institute\, Technical University of Denmark (DTU)\, Denmark	2018-06-14T17:03:25Z	2018-05-31T13:35:05Z	public	BRA-53a_1	BRA-53a_1		-1.35673	-48.4454	Centre for Genomic Epidemiology
ERR2607395	WGS	PRJEB27054	SAMEA4700716	CENTRE FOR GENOMIC EPIDEMIOLOGY, NATIONAL FOOD INS	public	ERX2624051	Illumina HiSeq 3000		unspecified	PAIRED	RANDOM	METAGENOMIC	wastewater metagenome	ILLUMINA	2018-07-03T00:00:00Z	SAMEA4700716	ERP109094	fastq,sra	ena,ncbi,gs,s3	ncbi.public,s3.us-east-1,gs.US,ena	2059008214	Brazil	South America	2016-02-15	302	4495948594		Brazil		-1.35673	-48.4454	2018-06-14	2018-06-14	2018-11-16	2018-05-31	SAMEA4700716	DTU-GE	Centre for Genomic Epidemiology\, National Food Institute\, Technical University of Denmark (DTU)\, Denmark	2018-06-14T17:03:25Z	2018-05-31T13:35:05Z	public	BRA-53a_2	BRA-53a_2		-1.35673	-48.4454	Centre for Genomic Epidemiology
ERR2607396	WGS	PRJEB27054	SAMEA4700717	CENTRE FOR GENOMIC EPIDEMIOLOGY, NATIONAL FOOD INS	public	ERX2624052	Illumina HiSeq 3000		unspecified	PAIRED	RANDOM	METAGENOMIC	wastewater metagenome	ILLUMINA	2018-07-03T00:00:00Z	SAMEA4700717	ERP109094	fastq,sra	ncbi,ena,gs,s3	gs.US,s3.us-east-1,ena,ncbi.public	5152856458	Brazil	South America	2016-02-15	302	12232797202		Brazil		-1.35673	-48.4454	2018-06-14	2018-06-14	2018-11-16	2018-05-31	SAMEA4700717	DTU-GE	Centre for Genomic Epidemiology\, National Food Institute\, Technical University of Denmark (DTU)\, Denmark	2018-06-14T17:03:25Z	2018-05-31T13:35:05Z	public	BRA-53a	BRA-53a		-1.35673	-48.4454	Centre for Genomic Epidemiology
ERR2592248	WGS	PRJEB13831	SAMEA4527604	DTU CGE	public	ERX2608524	Illumina HiSeq 3000	Illumina HiSeq	BRA.53_3	PAIRED	RANDOM	METAGENOMIC	wastewater metagenome	ILLUMINA	2019-02-08T00:00:00Z	SAMEA4527604	ERP015409	fastq,sra	ena,gs,ncbi,s3	ena,gs.US,ncbi.public,s3.us-east-1	2780631876	Brazil	South America	2016-02-16						-1.4558	-48.4902	2019-01-31	2019-01-31	2018-11-16	2016-10-31	SAMEA4527604	DTU	Technical University of Denmark	2019-01-31T17:02:41Z	2016-10-31T11:12:16Z	public	BRA.53	BRA.53	Brazil	1.4558? S	48.4902? W	Centre for Genomic Epidemiology	metagenome	wastewater treatment plant
ERR1713336	WGS	PRJEB13831	SAMEA4527604	DTU	public	ERX1783570	Illumina HiSeq 3000	Illumina HiSeq	BRA.53	PAIRED	RANDOM	METAGENOMIC	wastewater metagenome	ILLUMINA	2019-02-08T00:00:00Z	SAMEA4527604	ERP015409	fastq,sra	ena,gs,ncbi,s3	ena,gs.US,ncbi.public,s3.us-east-1	2975629792	Brazil	South America	2016-02-16						-1.4558	-48.4902	2019-01-31	2019-01-31	2018-11-16	2016-10-31	SAMEA4527604	DTU	Technical University of Denmark	2019-01-31T17:02:41Z	2016-10-31T11:12:16Z	public	BRA.53	BRA.53	Brazil	1.4558? S	48.4902? W	Centre for Genomic Epidemiology	metagenome	wastewater treatment plant
ERR1725949	WGS	PRJEB13831	SAMEA4527604	DTU	public	ERX1795934	Illumina HiSeq 3000	Illumina HiSeq	BRA.53_2	PAIRED	RANDOM	METAGENOMIC	wastewater metagenome	ILLUMINA	2019-02-08T00:00:00Z	SAMEA4527604	ERP015409	fastq,sra	ena,gs,ncbi,s3	ena,gs.US,ncbi.public,s3.us-east-1	315342654	Brazil	South America	2016-02-16						-1.4558	-48.4902	2019-01-31	2019-01-31	2018-11-16	2016-10-31	SAMEA4527604	DTU	Technical University of Denmark	2019-01-31T17:02:41Z	2016-10-31T11:12:16Z	public	BRA.53	BRA.53	Brazil	1.4558? S	48.4902? W	Centre for Genomic Epidemiology	metagenome	wastewater treatment plant
ERR2200453	WGS	PRJEB23496	SAMEA4527604	ERASMUS MC, UNIVERISTY MEDICAL CENTER	public	ERX2255441	Ion Torrent S5 XL	Ion Torrent S5 XL	Ion Xpress‚Ñ¢ Plus Fragment Library Kit	SINGLE	RANDOM	METAGENOMIC	wastewater metagenome	ION_TORRENT	2020-05-30T00:00:00Z	SAMEA4527604	ERP105254	sra	gs,ncbi,s3	gs.US,ncbi.public,s3.us-east-1	1242324182	Brazil	South America	2016-02-16						-1.4558	-48.4902	2020-05-29	2019-01-31	2018-11-16	2016-10-31	SAMEA4527604	DTU	Technical University of Denmark	2019-01-31T17:02:41Z	2016-10-31T11:12:16Z	public	BRA.53	BRA.53	Brazil	1.4558? S	48.4902? W	Centre for Genomic Epidemiology	metagenome	wastewater treatment plant
ERR2734410	WGS	PRJEB23496	SAMEA4527604	ERASMUS MC, UNIVERISTY MEDICAL CENTER	public	ERX2747629	Ion Torrent S5 XL	Ion Torrent S5 XL	Ion Xpress‚Ñ¢ Plus Fragment Library Kit	SINGLE	RANDOM	METAGENOMIC	wastewater metagenome	ION_TORRENT	2020-05-30T00:00:00Z	SAMEA4527604	ERP105254	sra	gs,ncbi,s3	gs.US,ncbi.public,s3.us-east-1	442728271	Brazil	South America	2016-02-16	193	534868330				-1.4558	-48.4902	2020-05-29	2019-01-31	2018-11-16	2016-10-31	SAMEA4527604	DTU	Technical University of Denmark	2019-01-31T17:02:41Z	2016-10-31T11:12:16Z	public	BRA.53	BRA.53	Brazil	1.4558? S	48.4902? W	Centre for Genomic Epidemiology	metagenome	wastewater treatment plant
ERR2607392	WGS	PRJEB27054	SAMEA4700713	CENTRE FOR GENOMIC EPIDEMIOLOGY, NATIONAL FOOD INS	public	ERX2624048	Illumina HiSeq 3000		unspecified	PAIRED	RANDOM	METAGENOMIC	wastewater metagenome	ILLUMINA	2018-07-03T00:00:00Z	SAMEA4700713	ERP109094	sra,fastq	ena,ncbi,gs,s3	ena,s3.us-east-1,gs.US,ncbi.public	312740690	Brazil	South America	2016-02-16	302	679408192		Brazil		-19.8957	-43.8791	2018-06-14	2018-06-14	2018-11-16	2018-05-31	SAMEA4700713	DTU-GE	Centre for Genomic Epidemiology\, National Food Institute\, Technical University of Denmark (DTU)\, Denmark	2018-06-14T17:03:25Z	2018-05-31T13:35:05Z	public	BRA-53_1	BRA-53_1		-19.8957	-43.8791	Centre for Genomic Epidemiology
ERR2607393	WGS	PRJEB27054	SAMEA4700714	CENTRE FOR GENOMIC EPIDEMIOLOGY, NATIONAL FOOD INS	public	ERX2624049	Illumina HiSeq 3000		unspecified	PAIRED	RANDOM	METAGENOMIC	wastewater metagenome	ILLUMINA	2018-07-03T00:00:00Z	SAMEA4700714	ERP109094	sra,fastq	ena,ncbi,gs,s3	s3.us-east-1,gs.US,ena,ncbi.public	2761970355	Brazil	South America	2016-02-16	302	5492895894		Brazil		-19.8957	-43.8791	2018-06-14	2018-06-14	2018-11-16	2018-05-31	SAMEA4700714	DTU-GE	Centre for Genomic Epidemiology\, National Food Institute\, Technical University of Denmark (DTU)\, Denmark	2018-06-14T17:03:25Z	2018-05-31T13:35:05Z	public	BRA-53_2	BRA-53_2		-19.8957	-43.8791	Centre for Genomic Epidemiology
ERR2607397	WGS	PRJEB27054	SAMEA4700718	CENTRE FOR GENOMIC EPIDEMIOLOGY, NATIONAL FOOD INS	public	ERX2624053	Illumina HiSeq 3000		unspecified	PAIRED	RANDOM	METAGENOMIC	wastewater metagenome	ILLUMINA	2018-07-03T00:00:00Z	SAMEA4700718	ERP109094	sra,fastq	s3,ncbi,gs,ena	ncbi.public,ena,s3.us-east-1,gs.US	2952420014	Brazil	South America	2016-02-16	302	6994350502		Brazil		-19.8957	-43.8791	2018-06-14	2018-06-14	2018-11-16	2018-05-31	SAMEA4700718	DTU-GE	Centre for Genomic Epidemiology\, National Food Institute\, Technical University of Denmark (DTU)\, Denmark	2018-06-14T17:03:25Z	2018-05-31T13:35:05Z	public	BRA-53	BRA-53		-19.8957	-43.8791	Centre for Genomic Epidemiology
ERR2683188	WGS	PRJEB27621	SAMEA4777445	CENTRE FOR GENOMIC EPIDEMIOLOGY, NATIONAL FOOD INS	public	ERX2697802	Illumina NovaSeq 6000		unspecified	PAIRED	RANDOM	METAGENOMIC	wastewater metagenome	ILLUMINA	2020-07-02T00:00:00Z	SAMEA4777445	ERP109726	sra	s3,ncbi,gs	s3.us-east-1,ncbi.public,gs.US	3136659729	Brazil	South America	2017-06-23				Brazil		-1.42833	-48.4921	2020-07-01	2020-07-01	2018-11-16	2018-07-04	SAMEA4777445	DTU-GE	Centre for Genomic Epidemiology\, National Food Institute\, Technical University of Denmark (DTU)\, Denmark	2020-07-01T04:04:01Z	2018-07-04T17:53:41Z	public	DTU2017_MG_16_BR_BE	DTU2017_MG_16_BR_BE		-1.42833	-48.4921	Centre for Genomic Epidemiology
ERR4682834	WGS	PRJEB40816	SAMEA7428476	CENTRE FOR GENOMIC EPIDEMIOLOGY, NATIONAL FOOD INS	public	ERX4604283	Illumina NovaSeq 6000		unspecified	PAIRED	RANDOM	METAGENOMIC	wastewater metagenome	ILLUMINA	2021-06-25T00:00:00Z	SAMEA7428476	ERP124493	sra,fastq	ncbi,s3,gs	ncbi.public,gs.US,s3.us-east-1	3572758051	Brazil	South America	2018-07-09	298	11000916840		Brazil		13.0709	-59.5807	2021-06-24	2021-06-24	2021-06-24	2021-06-24	SAMEA7428476	DTU-GE	Centre for Genomic Epidemiology\, National Food Institute\, Technical University of Denmark (DTU)\, Denmark	2021-06-24T12:26:18Z	2021-06-24T12:26:18Z	public	DTU_2018_711_1_MG_BR_BH_408	DTU_2018_711_1_MG_BR_BH_408		13.0709	-59.5807	Centre for Genomic Epidemiology
ERR4682891	WGS	PRJEB40816	SAMEA7428533	CENTRE FOR GENOMIC EPIDEMIOLOGY, NATIONAL FOOD INS	public	ERX4604340	Illumina NovaSeq 6000		unspecified	PAIRED	RANDOM	METAGENOMIC	wastewater metagenome	ILLUMINA	2021-06-24T00:00:00Z	SAMEA7428533	ERP124493	fastq,sra	gs,ncbi,s3	ncbi.public,gs.US,s3.us-east-1	3314968640	Brazil	South America	2018-09-17	300	10276645127		Brazil		13.0709	-59.5807	2021-06-24	2021-06-24	2021-06-24	2021-06-24	SAMEA7428533	DTU-GE	Centre for Genomic Epidemiology\, National Food Institute\, Technical University of Denmark (DTU)\, Denmark	2021-06-24T12:26:19Z	2021-06-24T12:26:19Z	public	DTU_2018_776_1_MG_BR_RJ_473	DTU_2018_776_1_MG_BR_RJ_473				Centre for Genomic Epidemiology
ERR4678588	WGS	PRJEB40798	SAMEA7426288	CENTRE FOR GENOMIC EPIDEMIOLOGY, NATIONAL FOOD INS	public	ERX4600212	Illumina NovaSeq 6000		unspecified	PAIRED	RANDOM	METAGENOMIC	wastewater metagenome	ILLUMINA	2021-06-25T00:00:00Z	SAMEA7426288	ERP124466	sra,fastq	ncbi,s3,gs	ncbi.public,s3.us-east-1,gs.US	3495912161	Brazil	South America	2018-12-08	302	11612124084		Brazil		13.0709	-59.5807	2021-06-24	2021-06-24	2021-06-24	2021-06-24	SAMEA7426288	DTU-GE	Centre for Genomic Epidemiology\, National Food Institute\, Technical University of Denmark (DTU)\, Denmark	2021-06-24T12:26:13Z	2021-06-24T12:26:13Z	public	DTU_2018_830_1_MG_BR_BH_514	DTU_2018_830_1_MG_BR_BH_514				Centre for Genomic Epidemiology
ERR1713335	WGS	PRJEB13831	SAMEA4527603	DTU	public	ERX1783569	Illumina HiSeq 3000	Illumina HiSeq	BGR.66	PAIRED	RANDOM	METAGENOMIC	wastewater metagenome	ILLUMINA	2019-02-08T00:00:00Z	SAMEA4527603	ERP015409	fastq,sra	ena,gs,ncbi,s3	ena,gs.US,ncbi.public,s3.us-east-1	3271366738	Bulgaria	Europe	2016-02-04						42.6977	23.3219	2019-01-31	2019-01-31	2018-11-16	2016-10-31	SAMEA4527603	DTU	Technical University of Denmark	2019-01-31T17:02:41Z	2016-10-31T11:12:16Z	public	BGR.66	BGR.66	Bulgaria	42.6977? N	23.3219? E	Centre for Genomic Epidemiology	metagenome	wastewater treatment plant
ERR1725947	WGS	PRJEB13831	SAMEA4527603	DTU	public	ERX1795932	Illumina HiSeq 3000	Illumina HiSeq	BGR.66_2	PAIRED	RANDOM	METAGENOMIC	wastewater metagenome	ILLUMINA	2019-02-08T00:00:00Z	SAMEA4527603	ERP015409	fastq,sra	ena,gs,ncbi,s3	ena,gs.US,ncbi.public,s3.us-east-1	2271253022	Bulgaria	Europe	2016-02-04						42.6977	23.3219	2019-01-31	2019-01-31	2018-11-16	2016-10-31	SAMEA4527603	DTU	Technical University of Denmark	2019-01-31T17:02:41Z	2016-10-31T11:12:16Z	public	BGR.66	BGR.66	Bulgaria	42.6977? N	23.3219? E	Centre for Genomic Epidemiology	metagenome	wastewater treatment plant
ERR1725948	WGS	PRJEB13831	SAMEA4527603	DTU	public	ERX1795933	Illumina HiSeq 3000	Illumina HiSeq	BGR.66_3	PAIRED	RANDOM	METAGENOMIC	wastewater metagenome	ILLUMINA	2019-02-08T00:00:00Z	SAMEA4527603	ERP015409	fastq,sra	ena,gs,ncbi,s3	ena,gs.US,ncbi.public,s3.us-east-1	1019769286	Bulgaria	Europe	2016-02-04	302	2180524560				42.6977	23.3219	2019-01-31	2019-01-31	2018-11-16	2016-10-31	SAMEA4527603	DTU	Technical University of Denmark	2019-01-31T17:02:41Z	2016-10-31T11:12:16Z	public	BGR.66	BGR.66	Bulgaria	42.6977? N	23.3219? E	Centre for Genomic Epidemiology	metagenome	wastewater treatment plant
ERR2592247	WGS	PRJEB13831	SAMEA4527603	DTU CGE	public	ERX2608523	Illumina HiSeq 3000	Illumina HiSeq	BGR.66_4	PAIRED	RANDOM	METAGENOMIC	wastewater metagenome	ILLUMINA	2019-02-08T00:00:00Z	SAMEA4527603	ERP015409	fastq,sra	ena,gs,ncbi,s3	ena,gs.US,ncbi.public,s3.us-east-1	3488852904	Bulgaria	Europe	2016-02-04						42.6977	23.3219	2019-01-31	2019-01-31	2018-11-16	2016-10-31	SAMEA4527603	DTU	Technical University of Denmark	2019-01-31T17:02:41Z	2016-10-31T11:12:16Z	public	BGR.66	BGR.66	Bulgaria	42.6977? N	23.3219? E	Centre for Genomic Epidemiology	metagenome	wastewater treatment plant
ERR2200461	WGS	PRJEB23496	SAMEA4527603	ERASMUS MC, UNIVERISTY MEDICAL CENTER	public	ERX2255449	Ion Torrent S5 XL	Ion Torrent S5 XL	Ion Xpress‚Ñ¢ Plus Fragment Library Kit	SINGLE	RANDOM	METAGENOMIC	wastewater metagenome	ION_TORRENT	2020-05-30T00:00:00Z	SAMEA4527603	ERP105254	sra	gs,ncbi,s3	gs.US,ncbi.public,s3.us-east-1	1621467201	Bulgaria	Europe	2016-02-04						42.6977	23.3219	2020-05-29	2019-01-31	2018-11-16	2016-10-31	SAMEA4527603	DTU	Technical University of Denmark	2019-01-31T17:02:41Z	2016-10-31T11:12:16Z	public	BGR.66	BGR.66	Bulgaria	42.6977? N	23.3219? E	Centre for Genomic Epidemiology	metagenome	wastewater treatment plant
ERR2734411	WGS	PRJEB23496	SAMEA4527603	ERASMUS MC, UNIVERISTY MEDICAL CENTER	public	ERX2747630	Ion Torrent S5 XL	Ion Torrent S5 XL	Ion Xpress‚Ñ¢ Plus Fragment Library Kit	SINGLE	RANDOM	METAGENOMIC	wastewater metagenome	ION_TORRENT	2020-05-30T00:00:00Z	SAMEA4527603	ERP105254	sra	gs,ncbi,s3	gs.US,ncbi.public,s3.us-east-1	911751396	Bulgaria	Europe	2016-02-04	190	1110016199				42.6977	23.3219	2020-05-29	2019-01-31	2018-11-16	2016-10-31	SAMEA4527603	DTU	Technical University of Denmark	2019-01-31T17:02:41Z	2016-10-31T11:12:16Z	public	BGR.66	BGR.66	Bulgaria	42.6977? N	23.3219? E	Centre for Genomic Epidemiology	metagenome	wastewater treatment plant
ERR2607388	WGS	PRJEB27054	SAMEA4700709	CENTRE FOR GENOMIC EPIDEMIOLOGY, NATIONAL FOOD INS	public	ERX2624044	Illumina HiSeq 3000		unspecified	PAIRED	RANDOM	METAGENOMIC	wastewater metagenome	ILLUMINA	2018-07-03T00:00:00Z	SAMEA4700709	ERP109094	fastq,sra	ncbi,ena,gs,s3	gs.US,ena,s3.us-east-1,ncbi.public	2252089567	Bulgaria	Europe	2016-04-02	302	5081426632		Bulgaria		42.7507	23.3648	2018-06-14	2018-06-14	2018-11-16	2018-05-31	SAMEA4700709	DTU-GE	Centre for Genomic Epidemiology\, National Food Institute\, Technical University of Denmark (DTU)\, Denmark	2018-06-14T17:03:25Z	2018-05-31T13:35:05Z	public	BGR-66_1	BGR-66_1		42.7507	23.3648	Centre for Genomic Epidemiology
ERR2607389	WGS	PRJEB27054	SAMEA4700710	CENTRE FOR GENOMIC EPIDEMIOLOGY, NATIONAL FOOD INS	public	ERX2624045	Illumina HiSeq 3000		unspecified	PAIRED	RANDOM	METAGENOMIC	wastewater metagenome	ILLUMINA	2018-07-03T00:00:00Z	SAMEA4700710	ERP109094	sra,fastq	ena,ncbi,s3,gs	gs.US,ena,ncbi.public,s3.us-east-1	1019933442	Bulgaria	Europe	2016-04-02	302	2180878504		Bulgaria		42.7507	23.3648	2018-06-14	2018-06-14	2018-11-16	2018-05-31	SAMEA4700710	DTU-GE	Centre for Genomic Epidemiology\, National Food Institute\, Technical University of Denmark (DTU)\, Denmark	2018-06-14T17:03:25Z	2018-05-31T13:35:05Z	public	BGR-66_2	BGR-66_2		42.7507	23.3648	Centre for Genomic Epidemiology
ERR2607390	WGS	PRJEB27054	SAMEA4700711	CENTRE FOR GENOMIC EPIDEMIOLOGY, NATIONAL FOOD INS	public	ERX2624046	Illumina HiSeq 3000		unspecified	PAIRED	RANDOM	METAGENOMIC	wastewater metagenome	ILLUMINA	2018-07-03T00:00:00Z	SAMEA4700711	ERP109094	fastq,sra	ncbi,s3,gs,ena	ncbi.public,s3.us-east-1,gs.US,ena	3466831026	Bulgaria	Europe	2016-04-02	302	6862432976		Bulgaria		42.7507	23.3648	2018-06-14	2018-06-14	2018-11-16	2018-05-31	SAMEA4700711	DTU-GE	Centre for Genomic Epidemiology\, National Food Institute\, Technical University of Denmark (DTU)\, Denmark	2018-06-14T17:03:25Z	2018-05-31T13:35:05Z	public	BGR-66_3	BGR-66_3		42.7507	23.3648	Centre for Genomic Epidemiology
ERR2607391	WGS	PRJEB27054	SAMEA4700712	CENTRE FOR GENOMIC EPIDEMIOLOGY, NATIONAL FOOD INS	public	ERX2624047	Illumina HiSeq 3000		unspecified	PAIRED	RANDOM	METAGENOMIC	wastewater metagenome	ILLUMINA	2018-07-03T00:00:00Z	SAMEA4700712	ERP109094	sra,fastq	s3,ncbi,gs,ena	gs.US,ncbi.public,ena,s3.us-east-1	3243448187	Bulgaria	Europe	2016-04-02	302	7679127650		Bulgaria		42.7507	23.3648	2018-06-14	2018-06-14	2018-11-16	2018-05-31	SAMEA4700712	DTU-GE	Centre for Genomic Epidemiology\, National Food Institute\, Technical University of Denmark (DTU)\, Denmark	2018-06-14T17:03:25Z	2018-05-31T13:35:05Z	public	BGR-66	BGR-66		42.7507	23.3648	Centre for Genomic Epidemiology
ERR2683157	WGS	PRJEB27621	SAMEA4777414	CENTRE FOR GENOMIC EPIDEMIOLOGY, NATIONAL FOOD INS	public	ERX2697771	Illumina NovaSeq 6000		unspecified	PAIRED	RANDOM	METAGENOMIC	wastewater metagenome	ILLUMINA	2020-07-02T00:00:00Z	SAMEA4777414	ERP109726	sra	gs,s3,ncbi	ncbi.public,s3.us-east-1,gs.US	4501683609	Bulgaria	Europe	2017-06-18				Bulgaria		42.7509	23.3665	2020-07-01	2020-07-01	2018-11-16	2018-07-04	SAMEA4777414	DTU-GE	Centre for Genomic Epidemiology\, National Food Institute\, Technical University of Denmark (DTU)\, Denmark	2020-07-01T04:04:01Z	2018-07-04T17:53:40Z	public	DTU2017_MG_140_BG_SO	DTU2017_MG_140_BG_SO		42.7509	23.3665	Centre for Genomic Epidemiology
ERR4682813	WGS	PRJEB40816	SAMEA7428455	CENTRE FOR GENOMIC EPIDEMIOLOGY, NATIONAL FOOD INS	public	ERX4604262	Illumina NovaSeq 6000		unspecified	PAIRED	RANDOM	METAGENOMIC	wastewater metagenome	ILLUMINA	2021-06-25T00:00:00Z	SAMEA7428455	ERP124493	sra,fastq	ncbi,s3,gs	ncbi.public,gs.US,s3.us-east-1	4300280265	Bulgaria	Europe	2018-06-07	300	13278091746		Bulgaria		42.7507	23.3648	2021-06-24	2021-06-24	2021-06-24	2021-06-24	SAMEA7428455	DTU-GE	Centre for Genomic Epidemiology\, National Food Institute\, Technical University of Denmark (DTU)\, Denmark	2021-06-24T12:26:18Z	2021-06-24T12:26:18Z	public	DTU_2018_690_1_MG_BG_SO_378	DTU_2018_690_1_MG_BG_SO_378				Centre for Genomic Epidemiology
ERR2683165	WGS	PRJEB27621	SAMEA4777422	CENTRE FOR GENOMIC EPIDEMIOLOGY, NATIONAL FOOD INS	public	ERX2697779	Illumina NovaSeq 6000		unspecified	PAIRED	RANDOM	METAGENOMIC	wastewater metagenome	ILLUMINA	2020-07-02T00:00:00Z	SAMEA4777422	ERP109726	sra	gs,s3,ncbi	gs.US,ncbi.public,s3.us-east-1	3513489340	Burkina Faso	Africa	2017-06-13				Burkina Faso		12.4272	-1.48068	2020-07-01	2020-07-01	2018-11-16	2018-07-04	SAMEA4777422	DTU-GE	Centre for Genomic Epidemiology\, National Food Institute\, Technical University of Denmark (DTU)\, Denmark	2020-07-01T04:04:01Z	2018-07-04T17:53:40Z	public	DTU2017_MG_148_BF_OU	DTU2017_MG_148_BF_OU		12.4272	-1.48068	Centre for Genomic Epidemiology
ERR2683166	WGS	PRJEB27621	SAMEA4777423	CENTRE FOR GENOMIC EPIDEMIOLOGY, NATIONAL FOOD INS	public	ERX2697780	Illumina NovaSeq 6000		unspecified	PAIRED	RANDOM	METAGENOMIC	wastewater metagenome	ILLUMINA	2020-07-02T00:00:00Z	SAMEA4777423	ERP109726	sra	s3,gs,ncbi	ncbi.public,gs.US,s3.us-east-1	3659804138	Burkina Faso	Africa	2017-06-16				Burkina Faso		11.2055	-4.2758	2020-07-01	2020-07-01	2018-11-16	2018-07-04	SAMEA4777423	DTU-GE	Centre for Genomic Epidemiology\, National Food Institute\, Technical University of Denmark (DTU)\, Denmark	2020-07-01T04:04:01Z	2018-07-04T17:53:40Z	public	DTU2017_MG_149_BF_BO	DTU2017_MG_149_BF_BO		11.2055	-4.2758	Centre for Genomic Epidemiology
ERR4682409	WGS	PRJEB40815	SAMEA7428316	CENTRE FOR GENOMIC EPIDEMIOLOGY, NATIONAL FOOD INS	public	ERX4603861	Illumina NovaSeq 6000		unspecified	PAIRED	RANDOM	METAGENOMIC	wastewater metagenome	ILLUMINA	2021-06-25T00:00:00Z	SAMEA7428316	ERP124492	sra,fastq	ncbi,gs,s3	s3.us-east-1,ncbi.public,gs.US	4815966344	Burkina Faso	Africa	2017-12-19	302	15099309930		Burkina Faso		11.2055	-4.2758	2021-06-24	2021-06-24	2021-06-24	2021-06-24	SAMEA7428316	DTU-GE	Centre for Genomic Epidemiology\, National Food Institute\, Technical University of Denmark (DTU)\, Denmark	2021-06-24T12:26:18Z	2021-06-24T12:26:18Z	public	DTU_2017_578_1_MG_BF_BO_274	DTU_2017_578_1_MG_BF_BO_274				Centre for Genomic Epidemiology
ERR4682408	WGS	PRJEB40815	SAMEA7428315	CENTRE FOR GENOMIC EPIDEMIOLOGY, NATIONAL FOOD INS	public	ERX4603860	Illumina NovaSeq 6000		unspecified	PAIRED	RANDOM	METAGENOMIC	wastewater metagenome	ILLUMINA	2021-06-25T00:00:00Z	SAMEA7428315	ERP124492	fastq,sra	ncbi,gs,s3	s3.us-east-1,gs.US,ncbi.public	3902127109	Burkina Faso	Africa	2018-01-04	302	12120645878		Burkina Faso		11.2055	-4.2758	2021-06-24	2021-06-24	2021-06-24	2021-06-24	SAMEA7428315	DTU-GE	Centre for Genomic Epidemiology\, National Food Institute\, Technical University of Denmark (DTU)\, Denmark	2021-06-24T12:26:18Z	2021-06-24T12:26:18Z	public	DTU_2017_577_1_MG_BF_OU_273	DTU_2017_577_1_MG_BF_OU_273				Centre for Genomic Epidemiology
ERR4682793	WGS	PRJEB40816	SAMEA7428435	CENTRE FOR GENOMIC EPIDEMIOLOGY, NATIONAL FOOD INS	public	ERX4604242	Illumina NovaSeq 6000		unspecified	PAIRED	RANDOM	METAGENOMIC	wastewater metagenome	ILLUMINA	2021-06-25T00:00:00Z	SAMEA7428435	ERP124493	fastq,sra	gs,ncbi,s3	ncbi.public,s3.us-east-1,gs.US	4279472639	Burkina Faso	Africa	2018-06-22	300	12905353304		Burkina Faso		11.2055	-4.2758	2021-06-24	2021-06-24	2021-06-24	2021-06-24	SAMEA7428435	DTU-GE	Centre for Genomic Epidemiology\, National Food Institute\, Technical University of Denmark (DTU)\, Denmark	2021-06-24T12:26:18Z	2021-06-24T12:26:18Z	public	DTU_2018_668_1_MG_BF_OU_356	DTU_2018_668_1_MG_BF_OU_356				Centre for Genomic Epidemiology
ERR1713370	WGS	PRJEB13831	SAMEA4527638	DTU	public	ERX1783604	Illumina HiSeq 3000	Illumina HiSeq	KHM.21	PAIRED	RANDOM	METAGENOMIC	wastewater metagenome	ILLUMINA	2019-02-08T00:00:00Z	SAMEA4527638	ERP015409	fastq,sra	ena,gs,ncbi,s3	ena,gs.US,ncbi.public,s3.us-east-1	5291260800	Cambodia	Asia	2016-02-05						11.5449	104.892	2019-01-31	2019-01-31	2018-11-16	2016-10-31	SAMEA4527638	DTU	Technical University of Denmark	2019-01-31T17:02:41Z	2016-10-31T11:12:17Z	public	KHM.21	KHM.21	Cambodia	11.5449? N	104.8922? E	Centre for Genomic Epidemiology	metagenome	open sewer line
ERR2322870	WGS	PRJEB23496	SAMEA4527638	ERASMUS MC, UNIVERISTY MEDICAL CENTER	public	ERX2373833	Ion Torrent S5 XL	Ion Torrent S5 XL	Ion Xpress‚Ñ¢ Plus Fragment Library Kit	SINGLE	RANDOM	METAGENOMIC	wastewater metagenome	ION_TORRENT	2020-05-30T00:00:00Z	SAMEA4527638	ERP105254	sra	gs,ncbi,s3	gs.US,ncbi.public,s3.us-east-1	1228372124	Cambodia	Asia	2016-02-05	278	1546242003				11.5449	104.892	2020-05-29	2019-01-31	2018-11-16	2016-10-31	SAMEA4527638	DTU	Technical University of Denmark	2019-01-31T17:02:41Z	2016-10-31T11:12:17Z	public	KHM.21	KHM.21	Cambodia	11.5449? N	104.8922? E	Centre for Genomic Epidemiology	metagenome	open sewer line
ERR2607485	WGS	PRJEB27054	SAMEA4700806	CENTRE FOR GENOMIC EPIDEMIOLOGY, NATIONAL FOOD INS	public	ERX2624141	Illumina HiSeq 3000		unspecified	PAIRED	RANDOM	METAGENOMIC	wastewater metagenome	ILLUMINA	2018-07-03T00:00:00Z	SAMEA4700806	ERP109094	fastq,sra	ena,gs,s3,ncbi	gs.US,s3.us-east-1,ena,ncbi.public	5251313881	Cambodia	Asia	2016-05-02	302	12585624104		Cambodia		11.5226	104.903	2018-06-14	2018-06-14	2018-11-16	2018-05-31	SAMEA4700806	DTU-GE	Centre for Genomic Epidemiology\, National Food Institute\, Technical University of Denmark (DTU)\, Denmark	2018-06-14T17:03:25Z	2018-05-31T13:35:07Z	public	KHM-21	KHM-21		11.5226	104.903	Centre for Genomic Epidemiology
ERR2683171	WGS	PRJEB27621	SAMEA4777428	CENTRE FOR GENOMIC EPIDEMIOLOGY, NATIONAL FOOD INS	public	ERX2697785	Illumina NovaSeq 6000		unspecified	PAIRED	RANDOM	METAGENOMIC	wastewater metagenome	ILLUMINA	2020-07-02T00:00:00Z	SAMEA4777428	ERP109726	sra	ncbi,gs,s3	gs.US,ncbi.public,s3.us-east-1	4689377087	Cambodia	Asia	2017-06-13				Cambodia		11.5226	104.903	2020-07-01	2020-07-01	2018-11-16	2018-07-04	SAMEA4777428	DTU-GE	Centre for Genomic Epidemiology\, National Food Institute\, Technical University of Denmark (DTU)\, Denmark	2020-07-01T04:04:01Z	2018-07-04T17:53:41Z	public	DTU2017_MG_153_KH_PP	DTU2017_MG_153_KH_PP		11.5226	104.903	Centre for Genomic Epidemiology
ERR4682336	WGS	PRJEB40815	SAMEA7428243	CENTRE FOR GENOMIC EPIDEMIOLOGY, NATIONAL FOOD INS	public	ERX4603788	Illumina NovaSeq 6000		unspecified	PAIRED	RANDOM	METAGENOMIC	wastewater metagenome	ILLUMINA	2021-06-25T00:00:00Z	SAMEA7428243	ERP124492	fastq,sra	gs,ncbi,s3	s3.us-east-1,gs.US,ncbi.public	5948868623	Cambodia	Asia	2017-11-20	302	18367765330		Cambodia		11.5449	104.892	2021-06-24	2021-06-24	2021-06-24	2021-06-24	SAMEA7428243	DTU-GE	Centre for Genomic Epidemiology\, National Food Institute\, Technical University of Denmark (DTU)\, Denmark	2021-06-24T12:26:19Z	2021-06-24T12:26:19Z	public	DTU_2017_495_1_MG_KH_PP_191	DTU_2017_495_1_MG_KH_PP_191				Centre for Genomic Epidemiology
ERR4682779	WGS	PRJEB40816	SAMEA7428421	CENTRE FOR GENOMIC EPIDEMIOLOGY, NATIONAL FOOD INS	public	ERX4604228	Illumina NovaSeq 6000		unspecified	PAIRED	RANDOM	METAGENOMIC	wastewater metagenome	ILLUMINA	2021-06-25T00:00:00Z	SAMEA7428421	ERP124493	sra,fastq	s3,gs,ncbi	gs.US,s3.us-east-1,ncbi.public	3267075212	Cambodia	Asia	2018-06-22	299	10206932750		Cambodia		11.5449	104.892	2021-06-24	2021-06-24	2021-06-24	2021-06-24	SAMEA7428421	DTU-GE	Centre for Genomic Epidemiology\, National Food Institute\, Technical University of Denmark (DTU)\, Denmark	2021-06-24T12:26:19Z	2021-06-24T12:26:19Z	public	DTU_2018_653_1_MG_KH_PP_341	DTU_2018_653_1_MG_KH_PP_341				Centre for Genomic Epidemiology
ERR4678609	WGS	PRJEB40798	SAMEA7426309	CENTRE FOR GENOMIC EPIDEMIOLOGY, NATIONAL FOOD INS	public	ERX4600233	Illumina NovaSeq 6000		unspecified	PAIRED	RANDOM	METAGENOMIC	wastewater metagenome	ILLUMINA	2021-06-25T00:00:00Z	SAMEA7426309	ERP124466	sra,fastq	gs,ncbi,s3	gs.US,s3.us-east-1,ncbi.public	3903652661	Cambodia	Asia	2019-01-03	302	12787181622		Cambodia		11.5226	104.903	2021-06-24	2021-06-24	2021-06-24	2021-06-24	SAMEA7426309	DTU-GE	Centre for Genomic Epidemiology\, National Food Institute\, Technical University of Denmark (DTU)\, Denmark	2021-06-24T12:26:13Z	2021-06-24T12:26:13Z	public	DTU_2018_854_1_MG_KH_PP_538	DTU_2018_854_1_MG_KH_PP_538				Centre for Genomic Epidemiology
ERR2683156	WGS	PRJEB27621	SAMEA4777413	CENTRE FOR GENOMIC EPIDEMIOLOGY, NATIONAL FOOD INS	public	ERX2697770	Illumina NovaSeq 6000		unspecified	PAIRED	RANDOM	METAGENOMIC	wastewater metagenome	ILLUMINA	2020-07-02T00:00:00Z	SAMEA4777413	ERP109726	sra	ncbi,s3,gs	gs.US,ncbi.public,s3.us-east-1	3639293170	Cameroon	Africa	2017-06-15				Cameroon		3.87058	11.4845	2020-07-01	2020-07-01	2018-11-16	2018-07-04	SAMEA4777413	DTU-GE	Centre for Genomic Epidemiology\, National Food Institute\, Technical University of Denmark (DTU)\, Denmark	2020-07-01T04:04:01Z	2018-07-04T17:53:40Z	public	DTU2017_MG_13_CM_YA	DTU2017_MG_13_CM_YA		3.87058	11.4845	Centre for Genomic Epidemiology
ERR4682426	WGS	PRJEB40815	SAMEA7428333	CENTRE FOR GENOMIC EPIDEMIOLOGY, NATIONAL FOOD INS	public	ERX4603878	Illumina NovaSeq 6000		unspecified	PAIRED	RANDOM	METAGENOMIC	wastewater metagenome	ILLUMINA	2021-06-25T00:00:00Z	SAMEA7428333	ERP124492	fastq,sra	s3,gs,ncbi	s3.us-east-1,gs.US,ncbi.public	3804113100	Cameroon	Africa	2017-11-17	300	12219297600		Cameroon		3.87058	11.4845	2021-06-24	2021-06-24	2021-06-24	2021-06-24	SAMEA7428333	DTU-GE	Centre for Genomic Epidemiology\, National Food Institute\, Technical University of Denmark (DTU)\, Denmark	2021-06-24T12:26:19Z	2021-06-24T12:26:19Z	public	DTU_2017_595_1_MG_CM_YA_291	DTU_2017_595_1_MG_CM_YA_291				Centre for Genomic Epidemiology
ERR4682880	WGS	PRJEB40816	SAMEA7428522	CENTRE FOR GENOMIC EPIDEMIOLOGY, NATIONAL FOOD INS	public	ERX4604329	Illumina NovaSeq 6000		unspecified	PAIRED	RANDOM	METAGENOMIC	wastewater metagenome	ILLUMINA	2021-06-24T00:00:00Z	SAMEA7428522	ERP124493	sra,fastq	s3,gs,ncbi	s3.us-east-1,ncbi.public,gs.US	3550633131	Cameroon	Africa	2018-06-20	298	11056389835		Cameroon		3.87058	11.4845	2021-06-24	2021-06-24	2021-06-24	2021-06-24	SAMEA7428522	DTU-GE	Centre for Genomic Epidemiology\, National Food Institute\, Technical University of Denmark (DTU)\, Denmark	2021-06-24T12:26:19Z	2021-06-24T12:26:19Z	public	DTU_2018_761_1_MG_CM_YA_458	DTU_2018_761_1_MG_CM_YA_458				Centre for Genomic Epidemiology
ERR4678667	WGS	PRJEB40798	SAMEA7426367	CENTRE FOR GENOMIC EPIDEMIOLOGY, NATIONAL FOOD INS	public	ERX4600291	Illumina NovaSeq 6000		unspecified	PAIRED	RANDOM	METAGENOMIC	wastewater metagenome	ILLUMINA	2021-06-25T00:00:00Z	SAMEA7426367	ERP124466	fastq,sra	gs,s3,ncbi	s3.us-east-1,gs.US,ncbi.public	4274694333	Cameroon	Africa	2018-11-23	302	14118135788		Cameroon		3.87058	11.4845	2021-06-24	2021-06-24	2021-06-24	2021-06-24	SAMEA7426367	DTU-GE	Centre for Genomic Epidemiology\, National Food Institute\, Technical University of Denmark (DTU)\, Denmark	2021-06-24T12:26:14Z	2021-06-24T12:26:14Z	public	DTU_2018_912_1_MG_CM_YA_597	DTU_2018_912_1_MG_CM_YA_597				Centre for Genomic Epidemiology
SRR9030456	WGS	PRJNA482680	SAMN09711023	LETHBRIDGE RESEARCH AND DEVELOPMENT CENTRE	public	SRX5807715	Illumina HiSeq 2000	Illumina HiSeq	M_ST_029	PAIRED	RANDOM	METAGENOMIC	wastewater metagenome	ILLUMINA	2019-05-08T00:00:00Z	M_ST_029	SRP197139	fastq,sra	gs,ncbi,s3	gs.US,ncbi.public,s3.us-east-1	4795840222	Canada	North America	2014-07-21	200	11184646400	Metagenome or environmental	Canada: Alberta	urban wastewater	50.0405	-110.676
SRR9030455	WGS	PRJNA482680	SAMN09711024	LETHBRIDGE RESEARCH AND DEVELOPMENT CENTRE	public	SRX5807716	Illumina HiSeq 2000	Illumina HiSeq	M_ST_050	PAIRED	RANDOM	METAGENOMIC	wastewater metagenome	ILLUMINA	2019-05-08T00:00:00Z	M_ST_050	SRP197139	fastq,sra	gs,ncbi,s3	gs.US,ncbi.public,s3.us-east-1	4248562485	Canada	North America	2014-10-14	200	10059026400	Metagenome or environmental	Canada: Alberta	urban wastewater	50.0405	-110.676
SRR9030453	WGS	PRJNA482680	SAMN09710966	LETHBRIDGE RESEARCH AND DEVELOPMENT CENTRE	public	SRX5807718	Illumina HiSeq 2000	Illumina HiSeq	C_ST_053	PAIRED	RANDOM	METAGENOMIC	wastewater metagenome	ILLUMINA	2019-05-08T00:00:00Z	C_ST_053	SRP197139	fastq,sra	gs,ncbi,s3	gs.US,ncbi.public,s3.us-east-1	4296785777	Canada	North America	2014-10-20	200	10243688000	Metagenome or environmental	Canada: Alberta	urban wastewater	51.0486	-114.071
SRR9030454	WGS	PRJNA482680	SAMN09711025	LETHBRIDGE RESEARCH AND DEVELOPMENT CENTRE	public	SRX5807717	Illumina HiSeq 2000	Illumina HiSeq	M_ST_060	PAIRED	RANDOM	METAGENOMIC	wastewater metagenome	ILLUMINA	2019-05-08T00:00:00Z	M_ST_060	SRP197139	fastq,sra	gs,ncbi,s3	gs.US,ncbi.public,s3.us-east-1	4987467166	Canada	North America	2014-11-26	200	11618732800	Metagenome or environmental	Canada: Alberta	urban wastewater	50.0405	-110.676
SRR9030452	WGS	PRJNA482680	SAMN09710967	LETHBRIDGE RESEARCH AND DEVELOPMENT CENTRE	public	SRX5807719	Illumina HiSeq 2000	Illumina HiSeq	C_ST_062	PAIRED	RANDOM	METAGENOMIC	wastewater metagenome	ILLUMINA	2019-05-08T00:00:00Z	C_ST_062	SRP197139	fastq,sra	gs,ncbi,s3	gs.US,ncbi.public,s3.us-east-1	4687774803	Canada	North America	2014-12-15	200	11022576000	Metagenome or environmental	Canada: Alberta	urban wastewater	51.0486	-114.071
SRR9030457	WGS	PRJNA482680	SAMN09710967	LETHBRIDGE RESEARCH AND DEVELOPMENT CENTRE	public	SRX5807714	Illumina HiSeq 2000	Illumina HiSeq	C_ST_039	PAIRED	RANDOM	METAGENOMIC	wastewater metagenome	ILLUMINA	2019-05-08T00:00:00Z	C_ST_062	SRP197139	fastq,sra	gs,ncbi,s3	gs.US,ncbi.public,s3.us-east-1	4399484799	Canada	North America	2014-12-15	200	10451103800	Metagenome or environmental	Canada: Alberta	urban wastewater	51.0486	-114.071
ERR2607404	WGS	PRJEB27054	SAMEA4700725	CENTRE FOR GENOMIC EPIDEMIOLOGY, NATIONAL FOOD INS	public	ERX2624060	Illumina HiSeq 3000		unspecified	PAIRED	RANDOM	METAGENOMIC	wastewater metagenome	ILLUMINA	2018-07-03T00:00:00Z	SAMEA4700725	ERP109094	fastq,sra	gs,ena,ncbi,s3	ncbi.public,gs.US,ena,s3.us-east-1	306875916	Canada	North America	2016-01-02	302	695789578		Canada		51.0131	-114.025	2018-06-14	2018-06-14	2018-11-16	2018-05-31	SAMEA4700725	DTU-GE	Centre for Genomic Epidemiology\, National Food Institute\, Technical University of Denmark (DTU)\, Denmark	2018-06-14T17:03:25Z	2018-05-31T13:35:05Z	public	CAN-22a_1	CAN-22a_1		51.0131	-114.025	Centre for Genomic Epidemiology
ERR2607405	WGS	PRJEB27054	SAMEA4700726	CENTRE FOR GENOMIC EPIDEMIOLOGY, NATIONAL FOOD INS	public	ERX2624061	Illumina HiSeq 3000		unspecified	PAIRED	RANDOM	METAGENOMIC	wastewater metagenome	ILLUMINA	2018-07-03T00:00:00Z	SAMEA4700726	ERP109094	fastq,sra	ncbi,s3,ena,gs	ncbi.public,gs.US,s3.us-east-1,ena	1475353837	Canada	North America	2016-01-02	302	3375805830		Canada		51.0131	-114.025	2018-06-14	2018-06-14	2018-11-16	2018-05-31	SAMEA4700726	DTU-GE	Centre for Genomic Epidemiology\, National Food Institute\, Technical University of Denmark (DTU)\, Denmark	2018-06-14T17:03:25Z	2018-05-31T13:35:05Z	public	CAN-22a_2	CAN-22a_2		51.0131	-114.025	Centre for Genomic Epidemiology
ERR2607406	WGS	PRJEB27054	SAMEA4700727	CENTRE FOR GENOMIC EPIDEMIOLOGY, NATIONAL FOOD INS	public	ERX2624062	Illumina HiSeq 3000		unspecified	PAIRED	RANDOM	METAGENOMIC	wastewater metagenome	ILLUMINA	2018-07-03T00:00:00Z	SAMEA4700727	ERP109094	sra,fastq	ena,s3,ncbi,gs	gs.US,ncbi.public,s3.us-east-1,ena	138862126	Canada	North America	2016-01-02	302	297781664		Canada		51.0131	-114.025	2018-06-14	2018-06-14	2018-11-16	2018-05-31	SAMEA4700727	DTU-GE	Centre for Genomic Epidemiology\, National Food Institute\, Technical University of Denmark (DTU)\, Denmark	2018-06-14T17:03:25Z	2018-05-31T13:35:05Z	public	CAN-22a_3	CAN-22a_3		51.0131	-114.025	Centre for Genomic Epidemiology
ERR2607407	WGS	PRJEB27054	SAMEA4700728	CENTRE FOR GENOMIC EPIDEMIOLOGY, NATIONAL FOOD INS	public	ERX2624063	Illumina HiSeq 3000		unspecified	PAIRED	RANDOM	METAGENOMIC	wastewater metagenome	ILLUMINA	2018-07-03T00:00:00Z	SAMEA4700728	ERP109094	fastq,sra	ena,gs,s3,ncbi	ncbi.public,s3.us-east-1,gs.US,ena	650100292	Canada	North America	2016-01-02	302	1408272508		Canada		51.0131	-114.025	2018-06-14	2018-06-14	2018-11-16	2018-05-31	SAMEA4700728	DTU-GE	Centre for Genomic Epidemiology\, National Food Institute\, Technical University of Denmark (DTU)\, Denmark	2018-06-14T17:03:25Z	2018-05-31T13:35:05Z	public	CAN-22a_4	CAN-22a_4		51.0131	-114.025	Centre for Genomic Epidemiology
ERR2607408	WGS	PRJEB27054	SAMEA4700729	CENTRE FOR GENOMIC EPIDEMIOLOGY, NATIONAL FOOD INS	public	ERX2624064	Illumina HiSeq 3000		unspecified	PAIRED	RANDOM	METAGENOMIC	wastewater metagenome	ILLUMINA	2018-07-03T00:00:00Z	SAMEA4700729	ERP109094	sra,fastq	ena,ncbi,s3,gs	ncbi.public,ena,gs.US,s3.us-east-1	274418957	Canada	North America	2016-01-02	302	629687818		Canada		51.0131	-114.025	2018-06-14	2018-06-14	2018-11-16	2018-05-31	SAMEA4700729	DTU-GE	Centre for Genomic Epidemiology\, National Food Institute\, Technical University of Denmark (DTU)\, Denmark	2018-06-14T17:03:25Z	2018-05-31T13:35:05Z	public	CAN-22a	CAN-22a		51.0131	-114.025	Centre for Genomic Epidemiology
ERR2607409	WGS	PRJEB27054	SAMEA4700730	CENTRE FOR GENOMIC EPIDEMIOLOGY, NATIONAL FOOD INS	public	ERX2624065	Illumina HiSeq 3000		unspecified	PAIRED	RANDOM	METAGENOMIC	wastewater metagenome	ILLUMINA	2018-07-03T00:00:00Z	SAMEA4700730	ERP109094	sra,fastq	ncbi,ena,s3,gs	ncbi.public,s3.us-east-1,ena,gs.US	1345386138	Canada	North America	2016-01-02	302	3073772006		Canada		43.6336	-79.4794	2018-06-14	2018-06-14	2018-11-16	2018-05-31	SAMEA4700730	DTU-GE	Centre for Genomic Epidemiology\, National Food Institute\, Technical University of Denmark (DTU)\, Denmark	2018-06-14T17:03:25Z	2018-05-31T13:35:05Z	public	CAN-22b_1	CAN-22b_1		43.6336	-79.4794	Centre for Genomic Epidemiology
ERR2607410	WGS	PRJEB27054	SAMEA4700731	CENTRE FOR GENOMIC EPIDEMIOLOGY, NATIONAL FOOD INS	public	ERX2624066	Illumina HiSeq 3000		unspecified	PAIRED	RANDOM	METAGENOMIC	wastewater metagenome	ILLUMINA	2018-07-03T00:00:00Z	SAMEA4700731	ERP109094	sra,fastq	gs,s3,ena,ncbi	gs.US,ncbi.public,ena,s3.us-east-1	588885329	Canada	North America	2016-01-02	302	1274570464		Canada		43.6336	-79.4794	2018-06-14	2018-06-14	2018-11-16	2018-05-31	SAMEA4700731	DTU-GE	Centre for Genomic Epidemiology\, National Food Institute\, Technical University of Denmark (DTU)\, Denmark	2018-06-14T17:03:25Z	2018-05-31T13:35:05Z	public	CAN-22b_2	CAN-22b_2		43.6336	-79.4794	Centre for Genomic Epidemiology
ERR2607411	WGS	PRJEB27054	SAMEA4700732	CENTRE FOR GENOMIC EPIDEMIOLOGY, NATIONAL FOOD INS	public	ERX2624067	Illumina HiSeq 3000		unspecified	PAIRED	RANDOM	METAGENOMIC	wastewater metagenome	ILLUMINA	2018-07-03T00:00:00Z	SAMEA4700732	ERP109094	fastq,sra	ncbi,gs,s3,ena	gs.US,ncbi.public,s3.us-east-1,ena	3888636998	Canada	North America	2016-01-02	302	8030879432		Canada		43.6336	-79.4794	2018-06-14	2018-06-14	2018-11-16	2018-05-31	SAMEA4700732	DTU-GE	Centre for Genomic Epidemiology\, National Food Institute\, Technical University of Denmark (DTU)\, Denmark	2018-06-14T17:03:25Z	2018-05-31T13:35:05Z	public	CAN-22b_3	CAN-22b_3		43.6336	-79.4794	Centre for Genomic Epidemiology
ERR2607412	WGS	PRJEB27054	SAMEA4700733	CENTRE FOR GENOMIC EPIDEMIOLOGY, NATIONAL FOOD INS	public	ERX2624068	Illumina HiSeq 3000		unspecified	PAIRED	RANDOM	METAGENOMIC	wastewater metagenome	ILLUMINA	2018-07-03T00:00:00Z	SAMEA4700733	ERP109094	fastq,sra	ena,ncbi,s3,gs	s3.us-east-1,ena,ncbi.public,gs.US	15430491557	Canada	North America	2016-01-02	302	28561910626		Canada		43.6336	-79.4794	2018-06-14	2018-06-14	2018-11-16	2018-05-31	SAMEA4700733	DTU-GE	Centre for Genomic Epidemiology\, National Food Institute\, Technical University of Denmark (DTU)\, Denmark	2018-06-14T17:03:25Z	2018-05-31T13:35:05Z	public	CAN-22b_4	CAN-22b_4		43.6336	-79.4794	Centre for Genomic Epidemiology
ERR2607413	WGS	PRJEB27054	SAMEA4700734	CENTRE FOR GENOMIC EPIDEMIOLOGY, NATIONAL FOOD INS	public	ERX2624069	Illumina HiSeq 3000		unspecified	PAIRED	RANDOM	METAGENOMIC	wastewater metagenome	ILLUMINA	2018-07-03T00:00:00Z	SAMEA4700734	ERP109094	sra,fastq	ena,ncbi,s3,gs	s3.us-east-1,ena,gs.US,ncbi.public	2357134667	Canada	North America	2016-01-02	302	5362434612		Canada		43.6336	-79.4794	2018-06-14	2018-06-14	2018-11-16	2018-05-31	SAMEA4700734	DTU-GE	Centre for Genomic Epidemiology\, National Food Institute\, Technical University of Denmark (DTU)\, Denmark	2018-06-14T17:03:25Z	2018-05-31T13:35:05Z	public	CAN-22b	CAN-22b		43.6336	-79.4794	Centre for Genomic Epidemiology
ERR1713342	WGS	PRJEB13831	SAMEA4527610	DTU	public	ERX1783576	Illumina HiSeq 3000	Illumina HiSeq	CAN.22c	PAIRED	RANDOM	METAGENOMIC	wastewater metagenome	ILLUMINA	2019-02-08T00:00:00Z	SAMEA4527610	ERP015409	fastq,sra	ena,gs,ncbi,s3	ena,gs.US,ncbi.public,s3.us-east-1	5753094023	Canada	North America	2016-01-26						45.4215	-75.6972	2019-01-31	2019-01-31	2018-11-16	2016-10-31	SAMEA4527610	DTU	Technical University of Denmark	2019-01-31T17:02:41Z	2016-10-31T11:12:17Z	public	CAN.22c	CAN.22c	Canada	45.4215? N	75.6972? W	Centre for Genomic Epidemiology	metagenome	wastewater treatment plant
ERR1713339	WGS	PRJEB13831	SAMEA4527607	DTU	public	ERX1783573	Illumina HiSeq 3000	Illumina HiSeq	CAN.22	PAIRED	RANDOM	METAGENOMIC	wastewater metagenome	ILLUMINA	2019-02-08T00:00:00Z	SAMEA4527607	ERP015409	fastq,sra	ena,gs,ncbi	ena,gs.US,ncbi.public	415977793	Canada	North America	2016-01-26						50.4452	-104.619	2019-01-31	2019-01-31	2018-11-16	2016-10-31	SAMEA4527607	DTU	Technical University of Denmark	2019-01-31T17:02:41Z	2016-10-31T11:12:16Z	public	CAN.22	CAN.22	Canada	50.4452? N	104.6189? W	Centre for Genomic Epidemiology	metagenome	wastewater treatment plant
ERR1725954	WGS	PRJEB13831	SAMEA4527607	DTU	public	ERX1795939	Illumina HiSeq 3000	Illumina HiSeq	CAN.22_2	PAIRED	RANDOM	METAGENOMIC	wastewater metagenome	ILLUMINA	2019-02-08T00:00:00Z	SAMEA4527607	ERP015409	fastq,sra	ena,gs,ncbi,s3	ena,gs.US,ncbi.public,s3.us-east-1	128101763	Canada	North America	2016-01-26	302	270023938				50.4452	-104.619	2019-01-31	2019-01-31	2018-11-16	2016-10-31	SAMEA4527607	DTU	Technical University of Denmark	2019-01-31T17:02:41Z	2016-10-31T11:12:16Z	public	CAN.22	CAN.22	Canada	50.4452? N	104.6189? W	Centre for Genomic Epidemiology	metagenome	wastewater treatment plant
ERR2592329	WGS	PRJEB13831	SAMEA4527607	DTU CGE	public	ERX2608605	Illumina HiSeq 3000	Illumina HiSeq	CAN.22_3	PAIRED	RANDOM	METAGENOMIC	wastewater metagenome	ILLUMINA	2019-02-08T00:00:00Z	SAMEA4527607	ERP015409	fastq,sra	ena,gs,ncbi,s3	ena,gs.US,ncbi.public,s3.us-east-1	6721022298	Canada	North America	2016-01-26						50.4452	-104.619	2019-01-31	2019-01-31	2018-11-16	2016-10-31	SAMEA4527607	DTU	Technical University of Denmark	2019-01-31T17:02:41Z	2016-10-31T11:12:16Z	public	CAN.22	CAN.22	Canada	50.4452? N	104.6189? W	Centre for Genomic Epidemiology	metagenome	wastewater treatment plant
ERR2356164	WGS	PRJEB23496	SAMEA4527610	ERASMUS MC, UNIVERISTY MEDICAL CENTER	public	ERX2404808	Ion Torrent S5 XL	Ion Torrent S5 XL	Ion XpressÔøΩ Plus Fragment Library Kit	SINGLE	RANDOM	METAGENOMIC	wastewater metagenome	ION_TORRENT	2020-05-30T00:00:00Z	SAMEA4527610	ERP105254	sra	gs,ncbi,s3	gs.US,ncbi.public,s3.us-east-1	1201512469	Canada	North America	2016-01-26	291	1526661230				45.4215	-75.6972	2020-05-29	2019-01-31	2018-11-16	2016-10-31	SAMEA4527610	DTU	Technical University of Denmark	2019-01-31T17:02:41Z	2016-10-31T11:12:17Z	public	CAN.22c	CAN.22c	Canada	45.4215? N	75.6972? W	Centre for Genomic Epidemiology	metagenome	wastewater treatment plant
ERR2298122	WGS	PRJEB23496	SAMEA4527607	ERASMUS MC, UNIVERISTY MEDICAL CENTER	public	ERX2349648	Ion Torrent S5 XL	Ion Torrent S5 XL	Ion Xpress‚Ñ¢ Plus Fragment Library Kit	SINGLE	RANDOM	METAGENOMIC	wastewater metagenome	ION_TORRENT	2020-05-30T00:00:00Z	SAMEA4527607	ERP105254	sra	gs,ncbi,s3	gs.US,ncbi.public,s3.us-east-1	765669162	Canada	North America	2016-01-26	272	972168320				50.4452	-104.619	2020-05-29	2019-01-31	2018-11-16	2016-10-31	SAMEA4527607	DTU	Technical University of Denmark	2019-01-31T17:02:41Z	2016-10-31T11:12:16Z	public	CAN.22	CAN.22	Canada	50.4452? N	104.6189? W	Centre for Genomic Epidemiology	metagenome	wastewater treatment plant
ERR2607402	WGS	PRJEB27054	SAMEA4700723	CENTRE FOR GENOMIC EPIDEMIOLOGY, NATIONAL FOOD INS	public	ERX2624058	Illumina HiSeq 3000		unspecified	PAIRED	RANDOM	METAGENOMIC	wastewater metagenome	ILLUMINA	2018-07-03T00:00:00Z	SAMEA4700723	ERP109094	sra,fastq	gs,ncbi,s3,ena	ena,gs.US,ncbi.public,s3.us-east-1	128147745	Canada	North America	2016-01-26	302	270125108		Canada		50.4708	-104.744	2018-06-14	2018-06-14	2018-11-16	2018-05-31	SAMEA4700723	DTU-GE	Centre for Genomic Epidemiology\, National Food Institute\, Technical University of Denmark (DTU)\, Denmark	2018-06-14T17:03:25Z	2018-05-31T13:35:05Z	public	CAN-22_1	CAN-22_1		50.4708	-104.744	Centre for Genomic Epidemiology
ERR2607403	WGS	PRJEB27054	SAMEA4700724	CENTRE FOR GENOMIC EPIDEMIOLOGY, NATIONAL FOOD INS	public	ERX2624059	Illumina HiSeq 3000		unspecified	PAIRED	RANDOM	METAGENOMIC	wastewater metagenome	ILLUMINA	2018-07-03T00:00:00Z	SAMEA4700724	ERP109094	fastq,sra	ncbi,ena,s3,gs	ena,s3.us-east-1,ncbi.public,gs.US	6696489613	Canada	North America	2016-01-26	302	15051622922		Canada		50.4708	-104.744	2018-06-14	2018-06-14	2018-11-16	2018-05-31	SAMEA4700724	DTU-GE	Centre for Genomic Epidemiology\, National Food Institute\, Technical University of Denmark (DTU)\, Denmark	2018-06-14T17:03:25Z	2018-05-31T13:35:05Z	public	CAN-22_2	CAN-22_2		50.4708	-104.744	Centre for Genomic Epidemiology
ERR2607414	WGS	PRJEB27054	SAMEA4700735	CENTRE FOR GENOMIC EPIDEMIOLOGY, NATIONAL FOOD INS	public	ERX2624070	Illumina HiSeq 3000		unspecified	PAIRED	RANDOM	METAGENOMIC	wastewater metagenome	ILLUMINA	2018-07-03T00:00:00Z	SAMEA4700735	ERP109094	sra,fastq	ena,gs,s3,ncbi	ncbi.public,s3.us-east-1,gs.US,ena	5723699394	Canada	North America	2016-01-26	302	13625021732		Canada		45.462	-75.5909	2018-06-14	2018-06-14	2018-11-16	2018-05-31	SAMEA4700735	DTU-GE	Centre for Genomic Epidemiology\, National Food Institute\, Technical University of Denmark (DTU)\, Denmark	2018-06-14T17:03:25Z	2018-05-31T13:35:05Z	public	CAN-22c	CAN-22c		45.462	-75.5909	Centre for Genomic Epidemiology
ERR2607415	WGS	PRJEB27054	SAMEA4700736	CENTRE FOR GENOMIC EPIDEMIOLOGY, NATIONAL FOOD INS	public	ERX2624071	Illumina HiSeq 3000		unspecified	PAIRED	RANDOM	METAGENOMIC	wastewater metagenome	ILLUMINA	2018-07-03T00:00:00Z	SAMEA4700736	ERP109094	sra,fastq	gs,ncbi,ena,s3	s3.us-east-1,ncbi.public,gs.US,ena	411794105	Canada	North America	2016-01-26	302	943466724		Canada		50.4708	-104.744	2018-06-14	2018-06-14	2018-11-16	2018-05-31	SAMEA4700736	DTU-GE	Centre for Genomic Epidemiology\, National Food Institute\, Technical University of Denmark (DTU)\, Denmark	2018-06-14T17:03:25Z	2018-05-31T13:35:05Z	public	CAN-22	CAN-22		50.4708	-104.744	Centre for Genomic Epidemiology
ERR1713340	WGS	PRJEB13831	SAMEA4527608	DTU	public	ERX1783574	Illumina HiSeq 3000	Illumina HiSeq	CAN.22a	PAIRED	RANDOM	METAGENOMIC	wastewater metagenome	ILLUMINA	2019-02-08T00:00:00Z	SAMEA4527608	ERP015409	fastq,sra	ena,gs,ncbi,s3	ena,gs.US,ncbi.public,s3.us-east-1	273826104	Canada	North America	2016-02-01	302	628304960				51.0486	-114.071	2019-01-31	2019-01-31	2018-11-16	2016-10-31	SAMEA4527608	DTU	Technical University of Denmark	2019-01-31T17:02:41Z	2016-10-31T11:12:17Z	public	CAN.22a	CAN.22a	Canada	51.0486? N	114.0708? W	Centre for Genomic Epidemiology	metagenome	wastewater treatment plant
ERR1725955	WGS	PRJEB13831	SAMEA4527608	DTU	public	ERX1795940	Illumina HiSeq 3000	Illumina HiSeq	CAN.22a_2	PAIRED	RANDOM	METAGENOMIC	wastewater metagenome	ILLUMINA	2019-02-08T00:00:00Z	SAMEA4527608	ERP015409	fastq,sra	ena,gs,ncbi,s3	ena,gs.US,ncbi.public,s3.us-east-1	306134937	Canada	North America	2016-02-01	302	694070594				51.0486	-114.071	2019-01-31	2019-01-31	2018-11-16	2016-10-31	SAMEA4527608	DTU	Technical University of Denmark	2019-01-31T17:02:41Z	2016-10-31T11:12:17Z	public	CAN.22a	CAN.22a	Canada	51.0486? N	114.0708? W	Centre for Genomic Epidemiology	metagenome	wastewater treatment plant
ERR1725956	WGS	PRJEB13831	SAMEA4527608	DTU	public	ERX1795941	Illumina HiSeq 3000	Illumina HiSeq	CAN.22a_3	PAIRED	RANDOM	METAGENOMIC	wastewater metagenome	ILLUMINA	2019-02-08T00:00:00Z	SAMEA4527608	ERP015409	fastq,sra	ena,gs,ncbi,s3	ena,gs.US,ncbi.public,s3.us-east-1	1473118550	Canada	North America	2016-02-01	302	3370594216				51.0486	-114.071	2019-01-31	2019-01-31	2018-11-16	2016-10-31	SAMEA4527608	DTU	Technical University of Denmark	2019-01-31T17:02:41Z	2016-10-31T11:12:17Z	public	CAN.22a	CAN.22a	Canada	51.0486? N	114.0708? W	Centre for Genomic Epidemiology	metagenome	wastewater treatment plant
ERR1725957	WGS	PRJEB13831	SAMEA4527608	DTU	public	ERX1795942	Illumina HiSeq 3000	Illumina HiSeq	CAN.22a_4	PAIRED	RANDOM	METAGENOMIC	wastewater metagenome	ILLUMINA	2019-02-08T00:00:00Z	SAMEA4527608	ERP015409	fastq,sra	ena,gs,ncbi,s3	ena,gs.US,ncbi.public,s3.us-east-1	139933638	Canada	North America	2016-02-01						51.0486	-114.071	2019-01-31	2019-01-31	2018-11-16	2016-10-31	SAMEA4527608	DTU	Technical University of Denmark	2019-01-31T17:02:41Z	2016-10-31T11:12:17Z	public	CAN.22a	CAN.22a	Canada	51.0486? N	114.0708? W	Centre for Genomic Epidemiology	metagenome	wastewater treatment plant
ERR1725958	WGS	PRJEB13831	SAMEA4527608	DTU	public	ERX1795943	Illumina HiSeq 3000	Illumina HiSeq	CAN.22a_5	PAIRED	RANDOM	METAGENOMIC	wastewater metagenome	ILLUMINA	2019-02-08T00:00:00Z	SAMEA4527608	ERP015409	fastq,sra	ena,gs,ncbi,s3	ena,gs.US,ncbi.public,s3.us-east-1	654481363	Canada	North America	2016-02-01						51.0486	-114.071	2019-01-31	2019-01-31	2018-11-16	2016-10-31	SAMEA4527608	DTU	Technical University of Denmark	2019-01-31T17:02:41Z	2016-10-31T11:12:17Z	public	CAN.22a	CAN.22a	Canada	51.0486? N	114.0708? W	Centre for Genomic Epidemiology	metagenome	wastewater treatment plant
ERR2592250	WGS	PRJEB13831	SAMEA4527609	DTU CGE	public	ERX2608526	Illumina HiSeq 3000	Illumina HiSeq	CAN.22b_5	PAIRED	RANDOM	METAGENOMIC	wastewater metagenome	ILLUMINA	2019-02-08T00:00:00Z	SAMEA4527609	ERP015409	fastq,sra	ena,gs,ncbi,s3	ena,gs.US,ncbi.public,s3.us-east-1	15487701349	Canada	North America	2016-02-01						43.6532	-79.3832	2019-01-31	2019-01-31	2018-11-16	2016-10-31	SAMEA4527609	DTU	Technical University of Denmark	2019-01-31T17:02:41Z	2016-10-31T11:12:17Z	public	CAN.22b	CAN.22b	Canada	43.6532? N	79.3832? W	Centre for Genomic Epidemiology	metagenome	wastewater treatment plant
ERR2592330	WGS	PRJEB13831	SAMEA4527609	DTU CGE	public	ERX2608606	Illumina HiSeq 3000	Illumina HiSeq	CAN.22b_4	PAIRED	RANDOM	METAGENOMIC	wastewater metagenome	ILLUMINA	2019-02-08T00:00:00Z	SAMEA4527609	ERP015409	fastq	ena	ena		Canada	North America	2016-02-01						43.6532	-79.3832	2019-01-31	2019-01-31	2018-11-16	2016-10-31	SAMEA4527609	DTU	Technical University of Denmark	2019-01-31T17:02:41Z	2016-10-31T11:12:17Z	public	CAN.22b	CAN.22b	Canada	43.6532? N	79.3832? W	Centre for Genomic Epidemiology	metagenome	wastewater treatment plant
ERR1713341	WGS	PRJEB13831	SAMEA4527609	DTU	public	ERX1783575	Illumina HiSeq 3000	Illumina HiSeq	CAN.22b	PAIRED	RANDOM	METAGENOMIC	wastewater metagenome	ILLUMINA	2019-02-08T00:00:00Z	SAMEA4527609	ERP015409	fastq,sra	ena,gs,ncbi,s3	ena,gs.US,ncbi.public,s3.us-east-1	2374825713	Canada	North America	2016-02-01						43.6532	-79.3832	2019-01-31	2019-01-31	2018-11-16	2016-10-31	SAMEA4527609	DTU	Technical University of Denmark	2019-01-31T17:02:41Z	2016-10-31T11:12:17Z	public	CAN.22b	CAN.22b	Canada	43.6532? N	79.3832? W	Centre for Genomic Epidemiology	metagenome	wastewater treatment plant
ERR1725959	WGS	PRJEB13831	SAMEA4527609	DTU	public	ERX1795944	Illumina HiSeq 3000	Illumina HiSeq	CAN.22b_2	PAIRED	RANDOM	METAGENOMIC	wastewater metagenome	ILLUMINA	2019-02-08T00:00:00Z	SAMEA4527609	ERP015409	fastq,sra	ena,gs,ncbi,s3	ena,gs.US,ncbi.public,s3.us-east-1	1356505294	Canada	North America	2016-02-01						43.6532	-79.3832	2019-01-31	2019-01-31	2018-11-16	2016-10-31	SAMEA4527609	DTU	Technical University of Denmark	2019-01-31T17:02:41Z	2016-10-31T11:12:17Z	public	CAN.22b	CAN.22b	Canada	43.6532? N	79.3832? W	Centre for Genomic Epidemiology	metagenome	wastewater treatment plant
ERR1725960	WGS	PRJEB13831	SAMEA4527609	DTU	public	ERX1795945	Illumina HiSeq 3000	Illumina HiSeq	CAN.22b_3	PAIRED	RANDOM	METAGENOMIC	wastewater metagenome	ILLUMINA	2019-02-08T00:00:00Z	SAMEA4527609	ERP015409	fastq,sra	ena,gs,ncbi,s3	ena,gs.US,ncbi.public,s3.us-east-1	587936984	Canada	North America	2016-02-01	302	1272463108				43.6532	-79.3832	2019-01-31	2019-01-31	2018-11-16	2016-10-31	SAMEA4527609	DTU	Technical University of Denmark	2019-01-31T17:02:41Z	2016-10-31T11:12:17Z	public	CAN.22b	CAN.22b	Canada	43.6532? N	79.3832? W	Centre for Genomic Epidemiology	metagenome	wastewater treatment plant
ERR2596696	WGS	PRJEB23496	SAMEA4527609	ERASMUS MC, UNIVERISTY MEDICAL CENTER	public	ERX2612984	Illumina HiSeq 4000	Illumina HiSeq	The NEBNext¬Æ Ultra DNA Library Prep kit for Illumina	PAIRED	RANDOM	METAGENOMIC	wastewater metagenome	ILLUMINA	2020-05-30T00:00:00Z	SAMEA4527609	ERP105254	sra	gs,ncbi,s3	gs.US,ncbi.public,s3.us-east-1	919521438	Canada	North America	2016-02-01	302	2408667742				43.6532	-79.3832	2020-05-29	2019-01-31	2018-11-16	2016-10-31	SAMEA4527609	DTU	Technical University of Denmark	2019-01-31T17:02:41Z	2016-10-31T11:12:17Z	public	CAN.22b	CAN.22b	Canada	43.6532? N	79.3832? W	Centre for Genomic Epidemiology	metagenome	wastewater treatment plant
ERR2200447	WGS	PRJEB23496	SAMEA4527608	ERASMUS MC, UNIVERISTY MEDICAL CENTER	public	ERX2255435	Ion Torrent S5 XL	Ion Torrent S5 XL	Ion Xpress‚Ñ¢ Plus Fragment Library Kit	SINGLE	RANDOM	METAGENOMIC	wastewater metagenome	ION_TORRENT	2020-05-30T00:00:00Z	SAMEA4527608	ERP105254	sra	gs,ncbi,s3	gs.US,ncbi.public,s3.us-east-1	1366732107	Canada	North America	2016-02-01						51.0486	-114.071	2020-05-29	2019-01-31	2018-11-16	2016-10-31	SAMEA4527608	DTU	Technical University of Denmark	2019-01-31T17:02:41Z	2016-10-31T11:12:17Z	public	CAN.22a	CAN.22a	Canada	51.0486? N	114.0708? W	Centre for Genomic Epidemiology	metagenome	wastewater treatment plant
ERR2734408	WGS	PRJEB23496	SAMEA4527608	ERASMUS MC, UNIVERISTY MEDICAL CENTER	public	ERX2747627	Ion Torrent S5 XL	Ion Torrent S5 XL	Ion Xpress‚Ñ¢ Plus Fragment Library Kit	SINGLE	RANDOM	METAGENOMIC	wastewater metagenome	ION_TORRENT	2020-05-30T00:00:00Z	SAMEA4527608	ERP105254	sra	gs,ncbi,s3	gs.US,ncbi.public,s3.us-east-1	793544081	Canada	North America	2016-02-01	191	959111755				51.0486	-114.071	2020-05-29	2019-01-31	2018-11-16	2016-10-31	SAMEA4527608	DTU	Technical University of Denmark	2019-01-31T17:02:41Z	2016-10-31T11:12:17Z	public	CAN.22a	CAN.22a	Canada	51.0486? N	114.0708? W	Centre for Genomic Epidemiology	metagenome	wastewater treatment plant
ERR2200464	WGS	PRJEB23496	SAMEA4527609	ERASMUS MC, UNIVERISTY MEDICAL CENTER	public	ERX2255452	Ion Torrent S5 XL	Ion Torrent S5 XL	Ion Xpress‚Ñ¢ Plus Fragment Library Kit	SINGLE	RANDOM	METAGENOMIC	wastewater metagenome	ION_TORRENT	2020-05-30T00:00:00Z	SAMEA4527609	ERP105254	sra	gs,ncbi,s3	gs.US,ncbi.public,s3.us-east-1	1540395843	Canada	North America	2016-02-01						43.6532	-79.3832	2020-05-29	2019-01-31	2018-11-16	2016-10-31	SAMEA4527609	DTU	Technical University of Denmark	2019-01-31T17:02:41Z	2016-10-31T11:12:17Z	public	CAN.22b	CAN.22b	Canada	43.6532? N	79.3832? W	Centre for Genomic Epidemiology	metagenome	wastewater treatment plant
ERR2683152	WGS	PRJEB27621	SAMEA4777409	CENTRE FOR GENOMIC EPIDEMIOLOGY, NATIONAL FOOD INS	public	ERX2697766	Illumina NovaSeq 6000		unspecified	PAIRED	RANDOM	METAGENOMIC	wastewater metagenome	ILLUMINA	2020-07-02T00:00:00Z	SAMEA4777409	ERP109726	sra	gs,ncbi,s3	s3.us-east-1,gs.US,ncbi.public	3803848795	Canada	North America	2017-06-13				Canada		50.4411	-104.756	2020-07-01	2020-07-01	2018-11-16	2018-07-04	SAMEA4777409	DTU-GE	Centre for Genomic Epidemiology\, National Food Institute\, Technical University of Denmark (DTU)\, Denmark	2020-07-01T04:04:01Z	2018-07-04T17:53:40Z	public	DTU2017_MG_136_CA_RE	DTU2017_MG_136_CA_RE		50.4411	-104.756	Centre for Genomic Epidemiology
ERR2683154	WGS	PRJEB27621	SAMEA4777411	CENTRE FOR GENOMIC EPIDEMIOLOGY, NATIONAL FOOD INS	public	ERX2697768	Illumina NovaSeq 6000		unspecified	PAIRED	RANDOM	METAGENOMIC	wastewater metagenome	ILLUMINA	2020-07-02T00:00:00Z	SAMEA4777411	ERP109726	sra	gs,s3,ncbi	ncbi.public,gs.US,s3.us-east-1	4235518981	Canada	North America	2017-06-13				Canada		51.0131	-114.025	2020-07-01	2020-07-01	2018-11-16	2018-07-04	SAMEA4777411	DTU-GE	Centre for Genomic Epidemiology\, National Food Institute\, Technical University of Denmark (DTU)\, Denmark	2020-07-01T04:04:01Z	2018-07-04T17:53:40Z	public	DTU2017_MG_138_CA_CA	DTU2017_MG_138_CA_CA		51.0131	-114.025	Centre for Genomic Epidemiology
ERR2683155	WGS	PRJEB27621	SAMEA4777412	CENTRE FOR GENOMIC EPIDEMIOLOGY, NATIONAL FOOD INS	public	ERX2697769	Illumina NovaSeq 6000		unspecified	PAIRED	RANDOM	METAGENOMIC	wastewater metagenome	ILLUMINA	2020-07-02T00:00:00Z	SAMEA4777412	ERP109726	sra	gs,ncbi,s3	gs.US,s3.us-east-1,ncbi.public	4337544676	Canada	North America	2017-06-14				Canada		45.4599	-75.5853	2020-07-01	2020-07-01	2018-11-16	2018-07-04	SAMEA4777412	DTU-GE	Centre for Genomic Epidemiology\, National Food Institute\, Technical University of Denmark (DTU)\, Denmark	2020-07-01T04:04:01Z	2018-07-04T17:53:40Z	public	DTU2017_MG_139_CA_OT	DTU2017_MG_139_CA_OT		45.4599	-75.5853	Centre for Genomic Epidemiology
ERR2683159	WGS	PRJEB27621	SAMEA4777416	CENTRE FOR GENOMIC EPIDEMIOLOGY, NATIONAL FOOD INS	public	ERX2697773	Illumina NovaSeq 6000		unspecified	PAIRED	RANDOM	METAGENOMIC	wastewater metagenome	ILLUMINA	2020-07-02T00:00:00Z	SAMEA4777416	ERP109726	sra	gs,s3,ncbi	ncbi.public,s3.us-east-1,gs.US	4170096492	Canada	North America	2017-06-14				Canada		43.6313	-79.4806	2020-07-01	2020-07-01	2018-11-16	2018-07-04	SAMEA4777416	DTU-GE	Centre for Genomic Epidemiology\, National Food Institute\, Technical University of Denmark (DTU)\, Denmark	2020-07-01T04:04:01Z	2018-07-04T17:53:40Z	public	DTU2017_MG_142_CA_TO	DTU2017_MG_142_CA_TO		43.6313	-79.4806	Centre for Genomic Epidemiology
ERR2683153	WGS	PRJEB27621	SAMEA4777410	CENTRE FOR GENOMIC EPIDEMIOLOGY, NATIONAL FOOD INS	public	ERX2697767	Illumina NovaSeq 6000		unspecified	PAIRED	RANDOM	METAGENOMIC	wastewater metagenome	ILLUMINA	2020-07-02T00:00:00Z	SAMEA4777410	ERP109726	sra	ncbi,gs,s3	gs.US,s3.us-east-1,ncbi.public	4229285660	Canada	North America	2017-06-23				Canada		49.1654	-122.951	2020-07-01	2020-07-01	2018-11-16	2018-07-04	SAMEA4777410	DTU-GE	Centre for Genomic Epidemiology\, National Food Institute\, Technical University of Denmark (DTU)\, Denmark	2020-07-01T04:04:01Z	2018-07-04T17:53:40Z	public	DTU2017_MG_137_CA_VA	DTU2017_MG_137_CA_VA		49.1654	-122.951	Centre for Genomic Epidemiology
ERR4682436	WGS	PRJEB40815	SAMEA7428343	CENTRE FOR GENOMIC EPIDEMIOLOGY, NATIONAL FOOD INS	public	ERX4603888	Illumina NovaSeq 6000		unspecified	PAIRED	RANDOM	METAGENOMIC	wastewater metagenome	ILLUMINA	2021-06-25T00:00:00Z	SAMEA7428343	ERP124492	sra,fastq	gs,s3,ncbi	ncbi.public,s3.us-east-1,gs.US	4210420948	Canada	North America	2017-11-19	301	12818719058		Canada		50.4411	-104.756	2021-06-24	2021-06-24	2021-06-24	2021-06-24	SAMEA7428343	DTU-GE	Centre for Genomic Epidemiology\, National Food Institute\, Technical University of Denmark (DTU)\, Denmark	2021-06-24T12:26:19Z	2021-06-24T12:26:19Z	public	DTU_2017_605_1_MG_CA_VA_301	DTU_2017_605_1_MG_CA_VA_301				Centre for Genomic Epidemiology
ERR4682435	WGS	PRJEB40815	SAMEA7428342	CENTRE FOR GENOMIC EPIDEMIOLOGY, NATIONAL FOOD INS	public	ERX4603887	Illumina NovaSeq 6000		unspecified	PAIRED	RANDOM	METAGENOMIC	wastewater metagenome	ILLUMINA	2021-06-25T00:00:00Z	SAMEA7428342	ERP124492	sra,fastq	gs,s3,ncbi	ncbi.public,gs.US,s3.us-east-1	3560533503	Canada	North America	2017-11-21	300	11222845474		Canada		51.0131	-114.025	2021-06-24	2021-06-24	2021-06-24	2021-06-24	SAMEA7428342	DTU-GE	Centre for Genomic Epidemiology\, National Food Institute\, Technical University of Denmark (DTU)\, Denmark	2021-06-24T12:26:19Z	2021-06-24T12:26:19Z	public	DTU_2017_604_1_MG_CA_CA_300	DTU_2017_604_1_MG_CA_CA_300				Centre for Genomic Epidemiology
ERR4682434	WGS	PRJEB40815	SAMEA7428341	CENTRE FOR GENOMIC EPIDEMIOLOGY, NATIONAL FOOD INS	public	ERX4603886	Illumina NovaSeq 6000		unspecified	PAIRED	RANDOM	METAGENOMIC	wastewater metagenome	ILLUMINA	2021-06-25T00:00:00Z	SAMEA7428341	ERP124492	sra,fastq	ncbi,s3,gs	ncbi.public,gs.US,s3.us-east-1	3029338860	Canada	North America	2017-11-22	300	9605303400		Canada		45.4599	-75.5853	2021-06-24	2021-06-24	2021-06-24	2021-06-24	SAMEA7428341	DTU-GE	Centre for Genomic Epidemiology\, National Food Institute\, Technical University of Denmark (DTU)\, Denmark	2021-06-24T12:26:19Z	2021-06-24T12:26:19Z	public	DTU_2017_603_1_MG_CA_RE_299	DTU_2017_603_1_MG_CA_RE_299				Centre for Genomic Epidemiology
ERR4682433	WGS	PRJEB40815	SAMEA7428340	CENTRE FOR GENOMIC EPIDEMIOLOGY, NATIONAL FOOD INS	public	ERX4603885	Illumina NovaSeq 6000		unspecified	PAIRED	RANDOM	METAGENOMIC	wastewater metagenome	ILLUMINA	2021-06-25T00:00:00Z	SAMEA7428340	ERP124492	sra,fastq	ncbi,s3,gs	ncbi.public,s3.us-east-1,gs.US	3585870134	Canada	North America	2017-11-27	300	11480280900		Canada		43.6313	-79.4806	2021-06-24	2021-06-24	2021-06-24	2021-06-24	SAMEA7428340	DTU-GE	Centre for Genomic Epidemiology\, National Food Institute\, Technical University of Denmark (DTU)\, Denmark	2021-06-24T12:26:19Z	2021-06-24T12:26:19Z	public	DTU_2017_602_1_MG_CA_OT_298	DTU_2017_602_1_MG_CA_OT_298				Centre for Genomic Epidemiology
ERR4682393	WGS	PRJEB40815	SAMEA7428300	CENTRE FOR GENOMIC EPIDEMIOLOGY, NATIONAL FOOD INS	public	ERX4603845	Illumina NovaSeq 6000		unspecified	PAIRED	RANDOM	METAGENOMIC	wastewater metagenome	ILLUMINA	2021-06-25T00:00:00Z	SAMEA7428300	ERP124492	fastq,sra	s3,ncbi,gs	gs.US,s3.us-east-1,ncbi.public	3959574921	Canada	North America	2017-12-05	302	12187471230		Canada		49.1654	-122.951	2021-06-24	2021-06-24	2021-06-24	2021-06-24	SAMEA7428300	DTU-GE	Centre for Genomic Epidemiology\, National Food Institute\, Technical University of Denmark (DTU)\, Denmark	2021-06-24T12:26:18Z	2021-06-24T12:26:18Z	public	DTU_2017_556_1_MG_CA_QE_252	DTU_2017_556_1_MG_CA_QE_252				Centre for Genomic Epidemiology
ERR4682830	WGS	PRJEB40816	SAMEA7428472	CENTRE FOR GENOMIC EPIDEMIOLOGY, NATIONAL FOOD INS	public	ERX4604279	Illumina NovaSeq 6000		unspecified	PAIRED	RANDOM	METAGENOMIC	wastewater metagenome	ILLUMINA	2021-06-25T00:00:00Z	SAMEA7428472	ERP124493	fastq,sra	gs,s3,ncbi	gs.US,s3.us-east-1,ncbi.public	4122913026	Canada	North America	2018-06-26	278	12288023921		Canada		50.4411	-104.756	2021-06-24	2021-06-24	2021-06-24	2021-06-24	SAMEA7428472	DTU-GE	Centre for Genomic Epidemiology\, National Food Institute\, Technical University of Denmark (DTU)\, Denmark	2021-06-24T12:26:18Z	2021-06-24T12:26:18Z	public	DTU_2018_707_1_MG_CA_CA_395	DTU_2018_707_1_MG_CA_CA_395				Centre for Genomic Epidemiology
ERR4682842	WGS	PRJEB40816	SAMEA7428484	CENTRE FOR GENOMIC EPIDEMIOLOGY, NATIONAL FOOD INS	public	ERX4604291	Illumina NovaSeq 6000		unspecified	PAIRED	RANDOM	METAGENOMIC	wastewater metagenome	ILLUMINA	2021-06-25T00:00:00Z	SAMEA7428484	ERP124493	sra,fastq	gs,s3,ncbi	s3.us-east-1,gs.US,ncbi.public	4522046955	Canada	North America	2018-07-09	296	14216579609		Canada		51.0131	-114.025	2021-06-24	2021-06-24	2021-06-24	2021-06-24	SAMEA7428484	DTU-GE	Centre for Genomic Epidemiology\, National Food Institute\, Technical University of Denmark (DTU)\, Denmark	2021-06-24T12:26:18Z	2021-06-24T12:26:18Z	public	DTU_2018_720_1_MG_CA_OT_417	DTU_2018_720_1_MG_CA_OT_417				Centre for Genomic Epidemiology
ERR4682831	WGS	PRJEB40816	SAMEA7428473	CENTRE FOR GENOMIC EPIDEMIOLOGY, NATIONAL FOOD INS	public	ERX4604280	Illumina NovaSeq 6000		unspecified	PAIRED	RANDOM	METAGENOMIC	wastewater metagenome	ILLUMINA	2021-06-25T00:00:00Z	SAMEA7428473	ERP124493	sra,fastq	ncbi,s3,gs	s3.us-east-1,ncbi.public,gs.US	3351690534	Canada	North America	2018-07-10	288	10235418676		Canada		45.4599	-75.5853	2021-06-24	2021-06-24	2021-06-24	2021-06-24	SAMEA7428473	DTU-GE	Centre for Genomic Epidemiology\, National Food Institute\, Technical University of Denmark (DTU)\, Denmark	2021-06-24T12:26:18Z	2021-06-24T12:26:18Z	public	DTU_2018_708_1_MG_CA_RE_396	DTU_2018_708_1_MG_CA_RE_396				Centre for Genomic Epidemiology
ERR4682843	WGS	PRJEB40816	SAMEA7428485	CENTRE FOR GENOMIC EPIDEMIOLOGY, NATIONAL FOOD INS	public	ERX4604292	Illumina NovaSeq 6000		unspecified	PAIRED	RANDOM	METAGENOMIC	wastewater metagenome	ILLUMINA	2021-06-25T00:00:00Z	SAMEA7428485	ERP124493	fastq,sra	s3,ncbi,gs	ncbi.public,gs.US,s3.us-east-1	4827631878	Canada	North America	2018-07-13	296	15045185077		Canada		43.6313	-79.4806	2021-06-24	2021-06-24	2021-06-24	2021-06-24	SAMEA7428485	DTU-GE	Centre for Genomic Epidemiology\, National Food Institute\, Technical University of Denmark (DTU)\, Denmark	2021-06-24T12:26:18Z	2021-06-24T12:26:18Z	public	DTU_2018_721_1_MG_CA_VA_418	DTU_2018_721_1_MG_CA_VA_418				Centre for Genomic Epidemiology
ERR4678659	WGS	PRJEB40798	SAMEA7426359	CENTRE FOR GENOMIC EPIDEMIOLOGY, NATIONAL FOOD INS	public	ERX4600283	Illumina NovaSeq 6000		unspecified	PAIRED	RANDOM	METAGENOMIC	wastewater metagenome	ILLUMINA	2021-06-25T00:00:00Z	SAMEA7426359	ERP124466	sra,fastq	ncbi,s3,gs	s3.us-east-1,ncbi.public,gs.US	4802429280	Canada	North America	2018-12-06	302	15647340874		Canada		49.1654	-122.951	2021-06-24	2021-06-24	2021-06-24	2021-06-24	SAMEA7426359	DTU-GE	Centre for Genomic Epidemiology\, National Food Institute\, Technical University of Denmark (DTU)\, Denmark	2021-06-24T12:26:14Z	2021-06-24T12:26:14Z	public	DTU_2018_904_1_MG_CA_VA_589	DTU_2018_904_1_MG_CA_VA_589				Centre for Genomic Epidemiology
ERR4678660	WGS	PRJEB40798	SAMEA7426360	CENTRE FOR GENOMIC EPIDEMIOLOGY, NATIONAL FOOD INS	public	ERX4600284	Illumina NovaSeq 6000		unspecified	PAIRED	RANDOM	METAGENOMIC	wastewater metagenome	ILLUMINA	2021-06-25T00:00:00Z	SAMEA7426360	ERP124466	sra,fastq	ncbi,gs,s3	s3.us-east-1,ncbi.public,gs.US	7362005722	Canada	North America	2018-12-06	302	24305544370		Canada		45.4599	-75.5853	2021-06-24	2021-06-24	2021-06-24	2021-06-24	SAMEA7426360	DTU-GE	Centre for Genomic Epidemiology\, National Food Institute\, Technical University of Denmark (DTU)\, Denmark	2021-06-24T12:26:14Z	2021-06-24T12:26:14Z	public	DTU_2018_905_1_MG_CA_OT_590	DTU_2018_905_1_MG_CA_OT_590				Centre for Genomic Epidemiology
ERR4678657	WGS	PRJEB40798	SAMEA7426357	CENTRE FOR GENOMIC EPIDEMIOLOGY, NATIONAL FOOD INS	public	ERX4600281	Illumina NovaSeq 6000		unspecified	PAIRED	RANDOM	METAGENOMIC	wastewater metagenome	ILLUMINA	2021-06-25T00:00:00Z	SAMEA7426357	ERP124466	fastq,sra	s3,gs,ncbi	gs.US,ncbi.public,s3.us-east-1	3320446599	Canada	North America	2018-12-10	302	10882932400		Canada		43.6313	-79.4806	2021-06-24	2021-06-24	2021-06-24	2021-06-24	SAMEA7426357	DTU-GE	Centre for Genomic Epidemiology\, National Food Institute\, Technical University of Denmark (DTU)\, Denmark	2021-06-24T12:26:13Z	2021-06-24T12:26:13Z	public	DTU_2018_902_1_MG_CA_CA_587	DTU_2018_902_1_MG_CA_CA_587				Centre for Genomic Epidemiology
ERR4678658	WGS	PRJEB40798	SAMEA7426358	CENTRE FOR GENOMIC EPIDEMIOLOGY, NATIONAL FOOD INS	public	ERX4600282	Illumina NovaSeq 6000		unspecified	PAIRED	RANDOM	METAGENOMIC	wastewater metagenome	ILLUMINA	2021-06-25T00:00:00Z	SAMEA7426358	ERP124466	sra,fastq	s3,gs,ncbi	s3.us-east-1,gs.US,ncbi.public	3369574652	Canada	North America	2018-12-19	302	11026769262		Canada		49.1654	-122.951	2021-06-24	2021-06-24	2021-06-24	2021-06-24	SAMEA7426358	DTU-GE	Centre for Genomic Epidemiology\, National Food Institute\, Technical University of Denmark (DTU)\, Denmark	2021-06-24T12:26:14Z	2021-06-24T12:26:14Z	public	DTU_2018_903_1_MG_CA_RE_588	DTU_2018_903_1_MG_CA_RE_588				Centre for Genomic Epidemiology
ERR4682809	WGS	PRJEB40816	SAMEA7428451	CENTRE FOR GENOMIC EPIDEMIOLOGY, NATIONAL FOOD INS	public	ERX4604258	Illumina NovaSeq 6000		unspecified	PAIRED	RANDOM	METAGENOMIC	wastewater metagenome	ILLUMINA	2021-06-25T00:00:00Z	SAMEA7428451	ERP124493	sra,fastq	ncbi,s3,gs	s3.us-east-1,gs.US,ncbi.public	5159933942	Canada	North America	2018-06	291	15987873923		Canada		49.1654	-122.951	2021-06-24	2021-06-24	2021-06-24	2021-06-24	SAMEA7428451	DTU-GE	Centre for Genomic Epidemiology\, National Food Institute\, Technical University of Denmark (DTU)\, Denmark	2021-06-24T12:26:18Z	2021-06-24T12:26:18Z	public	DTU_2018_686_1_MG_CA_QE_374	DTU_2018_686_1_MG_CA_QE_374				Centre for Genomic Epidemiology
ERR2592272	WGS	PRJEB13831	SAMEA4527661	DTU CGE	public	ERX2608548	Illumina HiSeq 3000	Illumina HiSeq	TCD.1_5	PAIRED	RANDOM	METAGENOMIC	wastewater metagenome	ILLUMINA	2019-02-08T00:00:00Z	SAMEA4527661	ERP015409	fastq,sra	ena,gs,ncbi,s3	ena,gs.US,ncbi.public,s3.us-east-1	12794676	Chad	Africa	2016-01-26						12.1348	15.0557	2019-01-31	2019-01-31	2018-11-16	2016-10-31	SAMEA4527661	DTU	Technical University of Denmark	2019-01-31T17:02:41Z	2016-10-31T11:12:18Z	public	TCD.1	TCD.1	Chad	12.1348? N	15.0557? E	Centre for Genomic Epidemiology	metagenome	open sewer line
ERR2592339	WGS	PRJEB13831	SAMEA4527661	DTU CGE	public	ERX2608615	Illumina HiSeq 3000	Illumina HiSeq	TCD.1_4	PAIRED	RANDOM	METAGENOMIC	wastewater metagenome	ILLUMINA	2019-02-08T00:00:00Z	SAMEA4527661	ERP015409	fastq,sra	ena,gs,ncbi,s3	ena,gs.US,ncbi.public,s3.us-east-1	958431609	Chad	Africa	2016-01-26						12.1348	15.0557	2019-01-31	2019-01-31	2018-11-16	2016-10-31	SAMEA4527661	DTU	Technical University of Denmark	2019-01-31T17:02:41Z	2016-10-31T11:12:18Z	public	TCD.1	TCD.1	Chad	12.1348? N	15.0557? E	Centre for Genomic Epidemiology	metagenome	open sewer line
ERR1713393	WGS	PRJEB13831	SAMEA4527661	DTU	public	ERX1783627	Illumina HiSeq 3000	Illumina HiSeq	TCD.1	PAIRED	RANDOM	METAGENOMIC	wastewater metagenome	ILLUMINA	2019-02-08T00:00:00Z	SAMEA4527661	ERP015409	fastq,sra	ena,gs,ncbi,s3	ena,gs.US,ncbi.public,s3.us-east-1	574286102	Chad	Africa	2016-01-26						12.1348	15.0557	2019-01-31	2019-01-31	2018-11-16	2016-10-31	SAMEA4527661	DTU	Technical University of Denmark	2019-01-31T17:02:41Z	2016-10-31T11:12:18Z	public	TCD.1	TCD.1	Chad	12.1348? N	15.0557? E	Centre for Genomic Epidemiology	metagenome	open sewer line
ERR1726007	WGS	PRJEB13831	SAMEA4527661	DTU	public	ERX1795992	Illumina HiSeq 3000	Illumina HiSeq	TCD.1_2	PAIRED	RANDOM	METAGENOMIC	wastewater metagenome	ILLUMINA	2019-02-08T00:00:00Z	SAMEA4527661	ERP015409	fastq,sra	ena,gs,ncbi,s3	ena,gs.US,ncbi.public,s3.us-east-1	385192070	Chad	Africa	2016-01-26	302	846251112				12.1348	15.0557	2019-01-31	2019-01-31	2018-11-16	2016-10-31	SAMEA4527661	DTU	Technical University of Denmark	2019-01-31T17:02:41Z	2016-10-31T11:12:18Z	public	TCD.1	TCD.1	Chad	12.1348? N	15.0557? E	Centre for Genomic Epidemiology	metagenome	open sewer line
ERR1726008	WGS	PRJEB13831	SAMEA4527661	DTU	public	ERX1795993	Illumina HiSeq 3000	Illumina HiSeq	TCD.1_3	PAIRED	RANDOM	METAGENOMIC	wastewater metagenome	ILLUMINA	2019-02-08T00:00:00Z	SAMEA4527661	ERP015409	fastq,sra	ena,gs,ncbi,s3	ena,gs.US,ncbi.public,s3.us-east-1	293515922	Chad	Africa	2016-01-26	302	632657988				12.1348	15.0557	2019-01-31	2019-01-31	2018-11-16	2016-10-31	SAMEA4527661	DTU	Technical University of Denmark	2019-01-31T17:02:41Z	2016-10-31T11:12:18Z	public	TCD.1	TCD.1	Chad	12.1348? N	15.0557? E	Centre for Genomic Epidemiology	metagenome	open sewer line
ERR2596695	WGS	PRJEB23496	SAMEA4527661	ERASMUS MC, UNIVERISTY MEDICAL CENTER	public	ERX2612983	Illumina HiSeq 4000	Illumina HiSeq	The NEBNext¬Æ Ultra DNA Library Prep kit for Illumina	PAIRED	RANDOM	METAGENOMIC	wastewater metagenome	ILLUMINA	2020-05-30T00:00:00Z	SAMEA4527661	ERP105254	sra	gs,ncbi,s3	gs.US,ncbi.public,s3.us-east-1	759069486	Chad	Africa	2016-01-26	302	1951061940				12.1348	15.0557	2020-05-29	2019-01-31	2018-11-16	2016-10-31	SAMEA4527661	DTU	Technical University of Denmark	2019-01-31T17:02:41Z	2016-10-31T11:12:18Z	public	TCD.1	TCD.1	Chad	12.1348? N	15.0557? E	Centre for Genomic Epidemiology	metagenome	open sewer line
ERR2200448	WGS	PRJEB23496	SAMEA4527661	ERASMUS MC, UNIVERISTY MEDICAL CENTER	public	ERX2255436	Ion Torrent S5 XL	Ion Torrent S5 XL	Ion Xpress‚Ñ¢ Plus Fragment Library Kit	SINGLE	RANDOM	METAGENOMIC	wastewater metagenome	ION_TORRENT	2020-05-30T00:00:00Z	SAMEA4527661	ERP105254	sra	gs,ncbi,s3	gs.US,ncbi.public,s3.us-east-1	2196813885	Chad	Africa	2016-01-26						12.1348	15.0557	2020-05-29	2019-01-31	2018-11-16	2016-10-31	SAMEA4527661	DTU	Technical University of Denmark	2019-01-31T17:02:41Z	2016-10-31T11:12:18Z	public	TCD.1	TCD.1	Chad	12.1348? N	15.0557? E	Centre for Genomic Epidemiology	metagenome	open sewer line
ERR2683258	WGS	PRJEB27621	SAMEA4777515	CENTRE FOR GENOMIC EPIDEMIOLOGY, NATIONAL FOOD INS	public	ERX2697872	Illumina NovaSeq 6000		unspecified	PAIRED	RANDOM	METAGENOMIC	wastewater metagenome	ILLUMINA	2020-07-02T00:00:00Z	SAMEA4777515	ERP109726	sra	s3,ncbi,gs	gs.US,ncbi.public,s3.us-east-1	4396698608	Chad	Africa	2017-06-11				Chad		12.1348	15.0557	2020-07-01	2020-07-01	2018-11-16	2018-07-04	SAMEA4777515	DTU-GE	Centre for Genomic Epidemiology\, National Food Institute\, Technical University of Denmark (DTU)\, Denmark	2020-07-01T04:04:01Z	2018-07-04T17:53:45Z	public	DTU2017_MG_7_TD_ND	DTU2017_MG_7_TD_ND		12.1348	15.0557	Centre for Genomic Epidemiology
ERR4682378	WGS	PRJEB40815	SAMEA7428285	CENTRE FOR GENOMIC EPIDEMIOLOGY, NATIONAL FOOD INS	public	ERX4603830	Illumina NovaSeq 6000		unspecified	PAIRED	RANDOM	METAGENOMIC	wastewater metagenome	ILLUMINA	2021-06-25T00:00:00Z	SAMEA7428285	ERP124492	fastq,sra	ncbi,gs,s3	ncbi.public,s3.us-east-1,gs.US	4219241653	Chad	Africa	2017-11-26	302	12939499550		Chad		12.1348	15.0557	2021-06-24	2021-06-24	2021-06-24	2021-06-24	SAMEA7428285	DTU-GE	Centre for Genomic Epidemiology\, National Food Institute\, Technical University of Denmark (DTU)\, Denmark	2021-06-24T12:26:18Z	2021-06-24T12:26:18Z	public	DTU_2017_541_1_MG_TD_ND_237	DTU_2017_541_1_MG_TD_ND_237				Centre for Genomic Epidemiology
ERR4678561	WGS	PRJEB40798	SAMEA7426261	CENTRE FOR GENOMIC EPIDEMIOLOGY, NATIONAL FOOD INS	public	ERX4600185	Illumina NovaSeq 6000		unspecified	PAIRED	RANDOM	METAGENOMIC	wastewater metagenome	ILLUMINA	2021-06-25T00:00:00Z	SAMEA7426261	ERP124466	fastq,sra	gs,s3	gs.US,s3.us-east-1	3537533326	Chad	Africa	2018-11-18	302	11456339800		Chad		12.1348	15.0557	2021-06-24	2021-06-24	2021-06-24	2021-06-24	SAMEA7426261	DTU-GE	Centre for Genomic Epidemiology\, National Food Institute\, Technical University of Denmark (DTU)\, Denmark	2021-06-24T12:26:12Z	2021-06-24T12:26:12Z	public	DTU_2018_802_1_MG_TD_ND_486	DTU_2018_802_1_MG_TD_ND_486				Centre for Genomic Epidemiology
ERR4682430	WGS	PRJEB40815	SAMEA7428337	CENTRE FOR GENOMIC EPIDEMIOLOGY, NATIONAL FOOD INS	public	ERX4603882	Illumina NovaSeq 6000		unspecified	PAIRED	RANDOM	METAGENOMIC	wastewater metagenome	ILLUMINA	2021-06-25T00:00:00Z	SAMEA7428337	ERP124492	sra,fastq	gs,s3,ncbi	ncbi.public,s3.us-east-1,gs.US	3967210407	Chile	South America	2017-11-29	301	12145194792		Chile		-35.6751	-71.543	2021-06-24	2021-06-24	2021-06-24	2021-06-24	SAMEA7428337	DTU-GE	Centre for Genomic Epidemiology\, National Food Institute\, Technical University of Denmark (DTU)\, Denmark	2021-06-24T12:26:19Z	2021-06-24T12:26:19Z	public	DTU_2017_599_1_MG_CL_PA_295	DTU_2017_599_1_MG_CL_PA_295				Centre for Genomic Epidemiology
ERR4682429	WGS	PRJEB40815	SAMEA7428336	CENTRE FOR GENOMIC EPIDEMIOLOGY, NATIONAL FOOD INS	public	ERX4603881	Illumina NovaSeq 6000		unspecified	PAIRED	RANDOM	METAGENOMIC	wastewater metagenome	ILLUMINA	2021-06-25T00:00:00Z	SAMEA7428336	ERP124492	fastq,sra	gs,ncbi,s3	s3.us-east-1,ncbi.public,gs.US	4166803854	Chile	South America	2017-12-04	301	12611907788		Chile		-35.6751	-71.543	2021-06-24	2021-06-24	2021-06-24	2021-06-24	SAMEA7428336	DTU-GE	Centre for Genomic Epidemiology\, National Food Institute\, Technical University of Denmark (DTU)\, Denmark	2021-06-24T12:26:19Z	2021-06-24T12:26:19Z	public	DTU_2017_598_1_MG_CL_SA_294	DTU_2017_598_1_MG_CL_SA_294				Centre for Genomic Epidemiology
ERR4682859	WGS	PRJEB40816	SAMEA7428501	CENTRE FOR GENOMIC EPIDEMIOLOGY, NATIONAL FOOD INS	public	ERX4604308	Illumina NovaSeq 6000		unspecified	PAIRED	RANDOM	METAGENOMIC	wastewater metagenome	ILLUMINA	2021-06-24T00:00:00Z	SAMEA7428501	ERP124493	sra,fastq	gs,ncbi,s3	gs.US,ncbi.public,s3.us-east-1	4228420990	Chile	South America	2018-08-14	298	13300772399		Chile		-35.6751	-71.543	2021-06-24	2021-06-24	2021-06-24	2021-06-24	SAMEA7428501	DTU-GE	Centre for Genomic Epidemiology\, National Food Institute\, Technical University of Denmark (DTU)\, Denmark	2021-06-24T12:26:19Z	2021-06-24T12:26:19Z	public	DTU_2018_737_1_MG_CL_SA_434	DTU_2018_737_1_MG_CL_SA_434				Centre for Genomic Epidemiology
ERR4682860	WGS	PRJEB40816	SAMEA7428502	CENTRE FOR GENOMIC EPIDEMIOLOGY, NATIONAL FOOD INS	public	ERX4604309	Illumina NovaSeq 6000		unspecified	PAIRED	RANDOM	METAGENOMIC	wastewater metagenome	ILLUMINA	2021-06-24T00:00:00Z	SAMEA7428502	ERP124493	fastq,sra	gs,s3	gs.US,s3.us-east-1	6310371991	Chile	South America	2018-08-14	298	20002453142		Chile		-35.6751	-71.543	2021-06-24	2021-06-24	2021-06-24	2021-06-24	SAMEA7428502	DTU-GE	Centre for Genomic Epidemiology\, National Food Institute\, Technical University of Denmark (DTU)\, Denmark	2021-06-24T12:26:19Z	2021-06-24T12:26:19Z	public	DTU_2018_738_1_MG_CL_SA_2_435	DTU_2018_738_1_MG_CL_SA_2_435				Centre for Genomic Epidemiology
ERR4678640	WGS	PRJEB40798	SAMEA7426340	CENTRE FOR GENOMIC EPIDEMIOLOGY, NATIONAL FOOD INS	public	ERX4600264	Illumina NovaSeq 6000		unspecified	PAIRED	RANDOM	METAGENOMIC	wastewater metagenome	ILLUMINA	2021-06-25T00:00:00Z	SAMEA7426340	ERP124466	sra,fastq	s3,ncbi,gs	s3.us-east-1,ncbi.public,gs.US	3430097723	Chile	South America	2019-01-24	302	11352944362		Chile		-35.6751	-71.543	2021-06-24	2021-06-24	2021-06-24	2021-06-24	SAMEA7426340	DTU-GE	Centre for Genomic Epidemiology\, National Food Institute\, Technical University of Denmark (DTU)\, Denmark	2021-06-24T12:26:13Z	2021-06-24T12:26:13Z	public	DTU_2018_885_1_MG_CL_SA_2_572	DTU_2018_885_1_MG_CL_SA_2_572				Centre for Genomic Epidemiology
ERR4678639	WGS	PRJEB40798	SAMEA7426339	CENTRE FOR GENOMIC EPIDEMIOLOGY, NATIONAL FOOD INS	public	ERX4600263	Illumina NovaSeq 6000		unspecified	PAIRED	RANDOM	METAGENOMIC	wastewater metagenome	ILLUMINA	2021-06-25T00:00:00Z	SAMEA7426339	ERP124466	fastq,sra	gs,s3	gs.US,s3.us-east-1	4221241297	Chile	South America	2019-01-24	302	13928378920		Chile		-35.6751	-71.543	2021-06-24	2021-06-24	2021-06-24	2021-06-24	SAMEA7426339	DTU-GE	Centre for Genomic Epidemiology\, National Food Institute\, Technical University of Denmark (DTU)\, Denmark	2021-06-24T12:26:13Z	2021-06-24T12:26:13Z	public	DTU_2018_884_1_MG_CL_SA_571	DTU_2018_884_1_MG_CL_SA_571				Centre for Genomic Epidemiology
ERR1713344	WGS	PRJEB13831	SAMEA4527612	DTU	public	ERX1783578	Illumina HiSeq 3000	Illumina HiSeq	CHN.64	PAIRED	RANDOM	METAGENOMIC	wastewater metagenome	ILLUMINA	2019-02-08T00:00:00Z	SAMEA4527612	ERP015409	fastq,sra	ena,gs,ncbi,s3	ena,gs.US,ncbi.public,s3.us-east-1	6713376442	China	Asia	2016-01-28	302	15800536414				23.1291	113.264	2019-01-31	2019-01-31	2018-11-16	2016-10-31	SAMEA4527612	DTU	Technical University of Denmark	2019-01-31T17:02:41Z	2016-10-31T11:12:17Z	public	CHN.64	CHN.64	China	23.1291? N	113.2644? E	Centre for Genomic Epidemiology	metagenome	wastewater treatment plant
ERR2322885	WGS	PRJEB23496	SAMEA4527612	ERASMUS MC, UNIVERISTY MEDICAL CENTER	public	ERX2373848	Ion Torrent S5 XL	Ion Torrent S5 XL	Ion Xpress‚Ñ¢ Plus Fragment Library Kit	SINGLE	RANDOM	METAGENOMIC	wastewater metagenome	ION_TORRENT	2020-05-30T00:00:00Z	SAMEA4527612	ERP105254	sra	gs,ncbi,s3	gs.US,ncbi.public,s3.us-east-1	905363324	China	Asia	2016-01-28						23.1291	113.264	2020-05-29	2019-01-31	2018-11-16	2016-10-31	SAMEA4527612	DTU	Technical University of Denmark	2019-01-31T17:02:41Z	2016-10-31T11:12:17Z	public	CHN.64	CHN.64	China	23.1291? N	113.2644? E	Centre for Genomic Epidemiology	metagenome	wastewater treatment plant
ERR2607423	WGS	PRJEB27054	SAMEA4700744	CENTRE FOR GENOMIC EPIDEMIOLOGY, NATIONAL FOOD INS	public	ERX2624079	Illumina HiSeq 3000		unspecified	PAIRED	RANDOM	METAGENOMIC	wastewater metagenome	ILLUMINA	2018-07-03T00:00:00Z	SAMEA4700744	ERP109094	sra,fastq	ncbi,s3,ena,gs	ena,ncbi.public,gs.US,s3.us-east-1	6716855436	China	Asia	2016-01-28	302	15808797020		China		23.1114	113.352	2018-06-14	2018-06-14	2018-11-16	2018-05-31	SAMEA4700744	DTU-GE	Centre for Genomic Epidemiology\, National Food Institute\, Technical University of Denmark (DTU)\, Denmark	2018-06-14T17:03:25Z	2018-05-31T13:35:06Z	public	CHN-64	CHN-64		23.1114	113.352	Centre for Genomic Epidemiology
ERR4682465	WGS	PRJEB40815	SAMEA7428372	CENTRE FOR GENOMIC EPIDEMIOLOGY, NATIONAL FOOD INS	public	ERX4603917	Illumina NovaSeq 6000		unspecified	PAIRED	RANDOM	METAGENOMIC	wastewater metagenome	ILLUMINA	2021-06-25T00:00:00Z	SAMEA7428372	ERP124492	sra,fastq	gs,ncbi,s3	gs.US,s3.us-east-1,ncbi.public	3597467086	China	Asia	2017-12-21	300	11433031800		China		23.1291	113.264	2021-06-24	2021-06-24	2021-06-24	2021-06-24	SAMEA7428372	DTU-GE	Centre for Genomic Epidemiology\, National Food Institute\, Technical University of Denmark (DTU)\, Denmark	2021-06-24T12:26:19Z	2021-06-24T12:26:19Z	public	DTU_2017_634_1_MG_CN_GU_330	DTU_2017_634_1_MG_CN_GU_330				Centre for Genomic Epidemiology
ERR4682898	WGS	PRJEB40816	SAMEA7428540	CENTRE FOR GENOMIC EPIDEMIOLOGY, NATIONAL FOOD INS	public	ERX4604347	Illumina NovaSeq 6000		unspecified	PAIRED	RANDOM	METAGENOMIC	wastewater metagenome	ILLUMINA	2021-06-24T00:00:00Z	SAMEA7428540	ERP124493	sra,fastq	s3,gs,ncbi	s3.us-east-1,gs.US,ncbi.public	3897235002	China	Asia	2018-06-05	296	12093210008		China		23.1291	113.264	2021-06-24	2021-06-24	2021-06-24	2021-06-24	SAMEA7428540	DTU-GE	Centre for Genomic Epidemiology\, National Food Institute\, Technical University of Denmark (DTU)\, Denmark	2021-06-24T12:26:19Z	2021-06-24T12:26:19Z	public	DTU_2018_783_1_MG_CN_GU_480	DTU_2018_783_1_MG_CN_GU_480				Centre for Genomic Epidemiology
ERR4682827	WGS	PRJEB40816	SAMEA7428469	CENTRE FOR GENOMIC EPIDEMIOLOGY, NATIONAL FOOD INS	public	ERX4604276	Illumina NovaSeq 6000		unspecified	PAIRED	RANDOM	METAGENOMIC	wastewater metagenome	ILLUMINA	2021-06-25T00:00:00Z	SAMEA7428469	ERP124493	sra,fastq	ncbi,gs,s3	gs.US,ncbi.public,s3.us-east-1	3574979452	China	Asia	2018-06-21	299	11083926736		China		23.1114	113.352	2021-06-24	2021-06-24	2021-06-24	2021-06-24	SAMEA7428469	DTU-GE	Centre for Genomic Epidemiology\, National Food Institute\, Technical University of Denmark (DTU)\, Denmark	2021-06-24T12:26:18Z	2021-06-24T12:26:18Z	public	DTU_2018_704_1_MG_CN_NA_392	DTU_2018_704_1_MG_CN_NA_392				Centre for Genomic Epidemiology
ERR4682828	WGS	PRJEB40816	SAMEA7428470	CENTRE FOR GENOMIC EPIDEMIOLOGY, NATIONAL FOOD INS	public	ERX4604277	Illumina NovaSeq 6000		unspecified	PAIRED	RANDOM	METAGENOMIC	wastewater metagenome	ILLUMINA	2021-06-25T00:00:00Z	SAMEA7428470	ERP124493	fastq,sra	gs,ncbi,s3	ncbi.public,gs.US,s3.us-east-1	4036954815	China	Asia	2018-06-22	298	12627841840		China		23.1114	113.352	2021-06-24	2021-06-24	2021-06-24	2021-06-24	SAMEA7428470	DTU-GE	Centre for Genomic Epidemiology\, National Food Institute\, Technical University of Denmark (DTU)\, Denmark	2021-06-24T12:26:18Z	2021-06-24T12:26:18Z	public	DTU_2018_705_1_MG_CN_YA_393	DTU_2018_705_1_MG_CN_YA_393				Centre for Genomic Epidemiology
SRR11296562	WGS	PRJNA612238	SAMN14365294	THE FIRST AFFILIATED HOSPITAL OF SHANTOU UNIVERSITY MEDICAL COLLEGE	public	SRX7901958	Illumina MiSeq	Illumina MiSeq	HJWS6M	PAIRED	PCR	METAGENOMIC	wastewater metagenome	ILLUMINA	2021-03-04T00:00:00Z	HJWS6M	SRP252583	fastq,sra	gs,ncbi,s3	gs.US,ncbi.public,s3.us-east-1	2893735112	China	Asia	2018-06-30	300	8942706600	Metagenome or environmental	China:Guangdong Shantou	not collected	23	116
SRR11296561	WGS	PRJNA612238	SAMN14365295	THE FIRST AFFILIATED HOSPITAL OF SHANTOU UNIVERSITY MEDICAL COLLEGE	public	SRX7901959	Illumina MiSeq	Illumina MiSeq	HJWS7M	PAIRED	PCR	METAGENOMIC	wastewater metagenome	ILLUMINA	2021-03-04T00:00:00Z	HJWS7M	SRP252583	fastq,sra	gs,ncbi,s3	gs.US,ncbi.public,s3.us-east-1	2360982362	China	Asia	2018-07-30	300	7410767400	Metagenome or environmental	China:Guangdong Shantou	not collected	23	117
SRR11296560	WGS	PRJNA612238	SAMN14365296	THE FIRST AFFILIATED HOSPITAL OF SHANTOU UNIVERSITY MEDICAL COLLEGE	public	SRX7901960	Illumina MiSeq	Illumina MiSeq	HJWS8M	PAIRED	PCR	METAGENOMIC	wastewater metagenome	ILLUMINA	2021-03-04T00:00:00Z	HJWS8M	SRP252583	fastq,sra	gs,ncbi,s3	gs.US,ncbi.public,s3.us-east-1	2774076969	China	Asia	2018-08-30	300	8482492200	Metagenome or environmental	China:Guangdong Shantou	not collected	23	118
SRR11296559	WGS	PRJNA612238	SAMN14365297	THE FIRST AFFILIATED HOSPITAL OF SHANTOU UNIVERSITY MEDICAL COLLEGE	public	SRX7901961	Illumina MiSeq	Illumina MiSeq	HJWS9M	PAIRED	PCR	METAGENOMIC	wastewater metagenome	ILLUMINA	2021-03-04T00:00:00Z	HJWS9M	SRP252583	fastq,sra	gs,ncbi,s3	gs.US,ncbi.public,s3.us-east-1	2414619168	China	Asia	2018-09-30	300	7505023800	Metagenome or environmental	China:Guangdong Shantou	not collected	23	119
SRR11296558	WGS	PRJNA612238	SAMN14365298	THE FIRST AFFILIATED HOSPITAL OF SHANTOU UNIVERSITY MEDICAL COLLEGE	public	SRX7901962	Illumina MiSeq	Illumina MiSeq	HJWS10M	PAIRED	PCR	METAGENOMIC	wastewater metagenome	ILLUMINA	2021-03-04T00:00:00Z	HJWS10M	SRP252583	fastq,sra	gs,ncbi,s3	gs.US,ncbi.public,s3.us-east-1	2475782351	China	Asia	2018-10-30	300	7494010800	Metagenome or environmental	China:Guangdong Shantou	not collected	23	120
SRR11296557	WGS	PRJNA612238	SAMN14365299	THE FIRST AFFILIATED HOSPITAL OF SHANTOU UNIVERSITY MEDICAL COLLEGE	public	SRX7901963	Illumina MiSeq	Illumina MiSeq	HJWS11M	PAIRED	PCR	METAGENOMIC	wastewater metagenome	ILLUMINA	2021-03-04T00:00:00Z	HJWS11M	SRP252583	fastq,sra	gs,ncbi,s3	gs.US,ncbi.public,s3.us-east-1	2339537970	China	Asia	2018-11-30	300	7207866300	Metagenome or environmental	China:Guangdong Shantou	not collected	23	121
ERR4678619	WGS	PRJEB40798	SAMEA7426319	CENTRE FOR GENOMIC EPIDEMIOLOGY, NATIONAL FOOD INS	public	ERX4600243	Illumina NovaSeq 6000		unspecified	PAIRED	RANDOM	METAGENOMIC	wastewater metagenome	ILLUMINA	2021-06-25T00:00:00Z	SAMEA7426319	ERP124466	sra,fastq	gs,s3,ncbi	ncbi.public,s3.us-east-1,gs.US	4968602412	China	Asia	2018-12-27	302	16308529104		China		23.1114	113.352	2021-06-24	2021-06-24	2021-06-24	2021-06-24	SAMEA7426319	DTU-GE	Centre for Genomic Epidemiology\, National Food Institute\, Technical University of Denmark (DTU)\, Denmark	2021-06-24T12:26:13Z	2021-06-24T12:26:13Z	public	DTU_2018_864_1_MG_CN_NA_548	DTU_2018_864_1_MG_CN_NA_548				Centre for Genomic Epidemiology
ERR4678623	WGS	PRJEB40798	SAMEA7426323	CENTRE FOR GENOMIC EPIDEMIOLOGY, NATIONAL FOOD INS	public	ERX4600247	Illumina NovaSeq 6000		unspecified	PAIRED	RANDOM	METAGENOMIC	wastewater metagenome	ILLUMINA	2021-06-25T00:00:00Z	SAMEA7426323	ERP124466	sra,fastq	gs,s3,ncbi	ncbi.public,s3.us-east-1,gs.US	7390529794	China	Asia	2018-12-27	302	24373379006		China		23.1114	113.352	2021-06-24	2021-06-24	2021-06-24	2021-06-24	SAMEA7426323	DTU-GE	Centre for Genomic Epidemiology\, National Food Institute\, Technical University of Denmark (DTU)\, Denmark	2021-06-24T12:26:13Z	2021-06-24T12:26:13Z	public	DTU_2018_868_1_MG_CH_SU_552	DTU_2018_868_1_MG_CH_SU_552				Centre for Genomic Epidemiology
ERR1713346	WGS	PRJEB13831	SAMEA4527614	DTU	public	ERX1783580	Illumina HiSeq 3000	Illumina HiSeq	COL.2	PAIRED	RANDOM	METAGENOMIC	wastewater metagenome	ILLUMINA	2019-02-08T00:00:00Z	SAMEA4527614	ERP015409	fastq,sra	ena,gs,ncbi,s3	ena,gs.US,ncbi.public,s3.us-east-1	3549394719	Colombia	South America	2016-01-27	302	8515846434				4.706	-74.2301	2019-01-31	2019-01-31	2018-11-16	2016-10-31	SAMEA4527614	DTU	Technical University of Denmark	2019-01-31T17:02:41Z	2016-10-31T11:12:17Z	public	COL.2	COL.2	Colombia	4.7060? N	74.2301? W	Centre for Genomic Epidemiology	metagenome	river
ERR2204078	WGS	PRJEB23496	SAMEA4527614	ERASMUS MC, UNIVERISTY MEDICAL CENTER	public	ERX2258452	Ion Torrent S5 XL	Ion Torrent S5 XL	Ion Xpress‚Ñ¢ Plus Fragment Library Kit	SINGLE	RANDOM	METAGENOMIC	wastewater metagenome	ION_TORRENT	2020-05-30T00:00:00Z	SAMEA4527614	ERP105254	sra	gs,ncbi,s3	gs.US,ncbi.public,s3.us-east-1	2056614047	Colombia	South America	2016-01-27						4.706	-74.2301	2020-05-29	2019-01-31	2018-11-16	2016-10-31	SAMEA4527614	DTU	Technical University of Denmark	2019-01-31T17:02:41Z	2016-10-31T11:12:17Z	public	COL.2	COL.2	Colombia	4.7060? N	74.2301? W	Centre for Genomic Epidemiology	metagenome	river
ERR2734409	WGS	PRJEB23496	SAMEA4527614	ERASMUS MC, UNIVERISTY MEDICAL CENTER	public	ERX2747628	Ion Torrent S5 XL	Ion Torrent S5 XL	Ion Xpress‚Ñ¢ Plus Fragment Library Kit	SINGLE	RANDOM	METAGENOMIC	wastewater metagenome	ION_TORRENT	2020-05-30T00:00:00Z	SAMEA4527614	ERP105254	sra	gs,ncbi,s3	gs.US,ncbi.public,s3.us-east-1	263555450	Colombia	South America	2016-01-27	192	320107261				4.706	-74.2301	2020-05-29	2019-01-31	2018-11-16	2016-10-31	SAMEA4527614	DTU	Technical University of Denmark	2019-01-31T17:02:41Z	2016-10-31T11:12:17Z	public	COL.2	COL.2	Colombia	4.7060? N	74.2301? W	Centre for Genomic Epidemiology	metagenome	river
SRR13695361	WGS	PRJNA648659	SAMN17884841	UNIVERSIDAD DE ANTIOQUIA	public	SRX10084614	Illumina NovaSeq 6000	Illumina NovaSeq	ES10	PAIRED	RANDOM	METAGENOMIC	aquatic metagenome	ILLUMINA	2021-05-26T00:00:00Z	E4	SRP273582	fastq,sra	gs,ncbi,s3	gs.US,ncbi.public,s3.us-east-1	1577746251	Colombia	South America	2017-05-01	302	5226295428	Metagenome or environmental	Colombia: Medellin	wastewater	6.2442	-75.5812
ERR4682410	WGS	PRJEB40815	SAMEA7428317	CENTRE FOR GENOMIC EPIDEMIOLOGY, NATIONAL FOOD INS	public	ERX4603862	Illumina NovaSeq 6000		unspecified	PAIRED	RANDOM	METAGENOMIC	wastewater metagenome	ILLUMINA	2021-06-25T00:00:00Z	SAMEA7428317	ERP124492	fastq,sra	s3,gs,ncbi	gs.US,s3.us-east-1,ncbi.public	4554748688	Colombia	South America	2017-12-28	302	14276145208		Colombia		-18.91	47.5256	2021-06-24	2021-06-24	2021-06-24	2021-06-24	SAMEA7428317	DTU-GE	Centre for Genomic Epidemiology\, National Food Institute\, Technical University of Denmark (DTU)\, Denmark	2021-06-24T12:26:18Z	2021-06-24T12:26:18Z	public	DTU_2017_579_1_MG_CO_MO_275	DTU_2017_579_1_MG_CO_MO_275				Centre for Genomic Epidemiology
ERR4682887	WGS	PRJEB40816	SAMEA7428529	CENTRE FOR GENOMIC EPIDEMIOLOGY, NATIONAL FOOD INS	public	ERX4604336	Illumina NovaSeq 6000		unspecified	PAIRED	RANDOM	METAGENOMIC	wastewater metagenome	ILLUMINA	2021-06-24T00:00:00Z	SAMEA7428529	ERP124493	sra,fastq	gs,ncbi,s3	gs.US,s3.us-east-1,ncbi.public	5889308180	Colombia	South America	2018-09-17	298	18550290806		Colombia		-18.91	47.5256	2021-06-24	2021-06-24	2021-06-24	2021-06-24	SAMEA7428529	DTU-GE	Centre for Genomic Epidemiology\, National Food Institute\, Technical University of Denmark (DTU)\, Denmark	2021-06-24T12:26:19Z	2021-06-24T12:26:19Z	public	DTU_2018_772_1_MG_CO_MO_469	DTU_2018_772_1_MG_CO_MO_469		-18.91	47.5256	Centre for Genomic Epidemiology
ERR4678684	WGS	PRJEB40798	SAMEA7426384	CENTRE FOR GENOMIC EPIDEMIOLOGY, NATIONAL FOOD INS	public	ERX4600308	Illumina NovaSeq 6000		unspecified	PAIRED	RANDOM	METAGENOMIC	wastewater metagenome	ILLUMINA	2021-06-25T00:00:00Z	SAMEA7426384	ERP124466	sra,fastq	gs,s3,ncbi	s3.us-east-1,gs.US,ncbi.public	2538215395	Colombia	South America	2019-04-25	302	8379417028		Colombia		-18.91	47.5256	2021-06-24	2021-06-24	2021-06-24	2021-06-24	SAMEA7426384	DTU-GE	Centre for Genomic Epidemiology\, National Food Institute\, Technical University of Denmark (DTU)\, Denmark	2021-06-24T12:26:14Z	2021-06-24T12:26:14Z	public	DTU_2018_933_1_MG_CO_MO_615	DTU_2018_933_1_MG_CO_MO_615				Centre for Genomic Epidemiology
SRR12325978	WGS	PRJNA648659	SAMN15643625	UNIVERSIDAD DE ANTIOQUIA	public	SRX8826199	Illumina NovaSeq 6000	Illumina NovaSeq	AS3	PAIRED	RANDOM	METAGENOMIC	aquatic metagenome	ILLUMINA	2021-05-26T00:00:00Z	AS3	SRP273582	fastq,sra	gs,ncbi,s3	gs.US,ncbi.public,s3.us-east-1	1254404784	Colombia	South America	2017-02	302	4165118466	Metagenome or environmental	Colombia: Medellin	wastewater	6.2442	-75.5812
SRR12354360	WGS	PRJNA648659	SAMN15679962	UNIVERSIDAD DE ANTIOQUIA	public	SRX8853770	Illumina NovaSeq 6000	Illumina NovaSeq	LS3	PAIRED	RANDOM	METAGENOMIC	aquatic metagenome	ILLUMINA	2021-05-26T00:00:00Z	L1	SRP273582	fastq,sra	gs,ncbi,s3	gs.US,ncbi.public,s3.us-east-1	1408373639	Colombia	South America	2017-02	302	4633923938	Metagenome or environmental	Colombia: Medellin	wastewater	6.2442	-75.5812
SRR13735366	WGS	PRJNA648659	SAMN17975956	UNIVERSIDAD DE ANTIOQUIA	public	SRX10122901	Illumina NovaSeq 6000	Illumina NovaSeq	ES3	PAIRED	RANDOM	METAGENOMIC	aquatic metagenome	ILLUMINA	2021-05-26T00:00:00Z	E1	SRP273582	fastq,sra	gs,ncbi,s3	gs.US,ncbi.public,s3.us-east-1	1225190427	Colombia	South America	2017-02	302	4034269416	Metagenome or environmental	Colombia: Medellin	wastewater	6.2442	-75.5812
SRR12328016	WGS	PRJNA648659	SAMN15648015	UNIVERSIDAD DE ANTIOQUIA	public	SRX8828236	Illumina NovaSeq 6000	Illumina NovaSeq	TS2	PAIRED	RANDOM	METAGENOMIC	aquatic metagenome	ILLUMINA	2021-05-26T00:00:00Z	T1	SRP273582	fastq,sra	gs,ncbi,s3	gs.US,ncbi.public,s3.us-east-1	1552050146	Colombia	South America	2017-02	302	5013095810	Metagenome or environmental	Colombia: Medellin	wastewater	6.2442	-75.5812
SRR12326204	WGS	PRJNA648659	SAMN15643684	UNIVERSIDAD DE ANTIOQUIA	public	SRX8826425	Illumina NovaSeq 6000	Illumina NovaSeq	AS5	PAIRED	RANDOM	METAGENOMIC	aquatic metagenome	ILLUMINA	2021-05-26T00:00:00Z	AS5	SRP273582	fastq,sra	gs,ncbi,s3	gs.US,ncbi.public,s3.us-east-1	1370801630	Colombia	South America	2017-03	302	4580227130	Metagenome or environmental	Colombia: Medellin	wastewater	6.2442	-75.5812
SRR12332666	WGS	PRJNA648659	SAMN15654397	UNIVERSIDAD DE ANTIOQUIA	public	SRX8832697	Illumina NovaSeq 6000	Illumina NovaSeq	TS4	PAIRED	RANDOM	METAGENOMIC	aquatic metagenome	ILLUMINA	2021-05-26T00:00:00Z	T2	SRP273582	fastq,sra	gs,ncbi,s3	gs.US,ncbi.public,s3.us-east-1	1485055483	Colombia	South America	2017-03	302	4955708260	Metagenome or environmental	Colombia: Medellin	wastewater	6.2442	-75.5812
SRR12354809	WGS	PRJNA648659	SAMN15680467	UNIVERSIDAD DE ANTIOQUIA	public	SRX8854171	Illumina NovaSeq 6000	Illumina NovaSeq	LS5	PAIRED	RANDOM	METAGENOMIC	aquatic metagenome	ILLUMINA	2021-05-26T00:00:00Z	L2	SRP273582	fastq,sra	gs,ncbi,s3	gs.US,ncbi.public,s3.us-east-1	1330233956	Colombia	South America	2017-03	302	4410006944	Metagenome or environmental	Colombia: Medellin	wastewater	6.2442	-75.5812
SRR12450810	WGS	PRJNA648659	SAMN15815134	UNIVERSIDAD DE ANTIOQUIA	public	SRX8945253	Illumina NovaSeq 6000	Illumina NovaSeq	ES5	PAIRED	RANDOM	METAGENOMIC	aquatic metagenome	ILLUMINA	2021-05-26T00:00:00Z	E2	SRP273582	fastq,sra	gs,ncbi,s3	gs.US,ncbi.public,s3.us-east-1	1469438576	Colombia	South America	2017-03	302	4839843846	Metagenome or environmental	Colombia: Medellin	wastewater	6.2442	-75.5812
SRR12334050	WGS	PRJNA648659	SAMN15655398	UNIVERSIDAD DE ANTIOQUIA	public	SRX8834005	Illumina NovaSeq 6000	Illumina NovaSeq	TS7	PAIRED	RANDOM	METAGENOMIC	aquatic metagenome	ILLUMINA	2021-05-26T00:00:00Z	T3	SRP273582	fastq,sra	gs,ncbi,s3	gs.US,ncbi.public,s3.us-east-1	1464541345	Colombia	South America	2017-04	302	4863650808	Metagenome or environmental	Colombia: Medellin	wastewater	6.2442	-75.5812
SRR13735271	WGS	PRJNA648659	SAMN17975909	UNIVERSIDAD DE ANTIOQUIA	public	SRX10122806	Illumina NovaSeq 6000	Illumina NovaSeq	LS8	PAIRED	RANDOM	METAGENOMIC	aquatic metagenome	ILLUMINA	2021-05-26T00:00:00Z	L3	SRP273582	fastq,sra	gs,ncbi,s3	gs.US,ncbi.public,s3.us-east-1	1281699998	Colombia	South America	2017-04	302	4279012330	Metagenome or environmental	Colombia: Medellin	wastewater	6.2442	-75.5812
SRR12451397	WGS	PRJNA648659	SAMN15815795	UNIVERSIDAD DE ANTIOQUIA	public	SRX8945840	Illumina NovaSeq 6000	Illumina NovaSeq	ES8	PAIRED	RANDOM	METAGENOMIC	aquatic metagenome	ILLUMINA	2021-05-26T00:00:00Z	E3	SRP273582	fastq,sra	gs,ncbi,s3	gs.US,ncbi.public,s3.us-east-1	1250807833	Colombia	South America	2017-04	302	4167719290	Metagenome or environmental	Colombia: Medellin	wastewater	6.2442	-75.5812
SRR12326496	WGS	PRJNA648659	SAMN15644197	UNIVERSIDAD DE ANTIOQUIA	public	SRX8826717	Illumina NovaSeq 6000	Illumina NovaSeq	AS8	PAIRED	RANDOM	METAGENOMIC	aquatic metagenome	ILLUMINA	2021-05-26T00:00:00Z	AS8	SRP273582	fastq,sra	gs,ncbi,s3	gs.US,ncbi.public,s3.us-east-1	1522761991	Colombia	South America	2017-05	302	5025546666	Metagenome or environmental	Colombia: Medellin	wastewater	6.2442	-75.5812
SRR12326541	WGS	PRJNA648659	SAMN15644294	UNIVERSIDAD DE ANTIOQUIA	public	SRX8826762	Illumina NovaSeq 6000	Illumina NovaSeq	AS10	PAIRED	RANDOM	METAGENOMIC	aquatic metagenome	ILLUMINA	2021-05-26T00:00:00Z	AS10	SRP273582	fastq,sra	gs,ncbi,s3	gs.US,ncbi.public,s3.us-east-1	1966883560	Colombia	South America	2017-05	302	6555760432	Metagenome or environmental	Colombia: Medellin	wastewater	6.2442	-75.5812
SRR12356872	WGS	PRJNA648659	SAMN15681558	UNIVERSIDAD DE ANTIOQUIA	public	SRX8856232	Illumina NovaSeq 6000	Illumina NovaSeq	LS10	PAIRED	RANDOM	METAGENOMIC	aquatic metagenome	ILLUMINA	2021-05-26T00:00:00Z	L4	SRP273582	fastq,sra	gs,ncbi,s3	gs.US,ncbi.public,s3.us-east-1	1516203091	Colombia	South America	2017-05	302	4989666952	Metagenome or environmental	Colombia: Medellin	wastewater	6.2442	-75.5812
SRR12339334	WGS	PRJNA648659	SAMN15660563	UNIVERSIDAD DE ANTIOQUIA	public	SRX8839186	Illumina NovaSeq 6000	Illumina NovaSeq	TS9	PAIRED	RANDOM	METAGENOMIC	aquatic metagenome	ILLUMINA	2021-05-26T00:00:00Z	T4	SRP273582	fastq,sra	gs,ncbi,s3	gs.US,ncbi.public,s3.us-east-1	1336496524	Colombia	South America	2017-05	302	4471840538	Metagenome or environmental	Colombia: Medellin	wastewater	6.2442	-75.5812
SRR13727143	WGS	PRJNA648659	SAMN17928651	UNIVERSIDAD DE ANTIOQUIA	public	SRX10115153	Illumina NovaSeq 6000	Illumina NovaSeq	AS11	PAIRED	RANDOM	METAGENOMIC	aquatic metagenome	ILLUMINA	2021-05-26T00:00:00Z	AS11	SRP273582	fastq,sra	gs,ncbi,s3	gs.US,ncbi.public,s3.us-east-1	1560926456	Colombia	South America	2017-06	302	5227043180	Metagenome or environmental	Colombia: Medellin	wastewater	6.2442	-75.5812
SRR12396704	WGS	PRJNA648659	SAMN15742125	UNIVERSIDAD DE ANTIOQUIA	public	SRX8894932	Illumina NovaSeq 6000	Illumina NovaSeq	LS11	PAIRED	RANDOM	METAGENOMIC	aquatic metagenome	ILLUMINA	2021-05-26T00:00:00Z	L5	SRP273582	fastq,sra	gs,ncbi,s3	gs.US,ncbi.public,s3.us-east-1	1714512478	Colombia	South America	2017-06	302	5749058636	Metagenome or environmental	Colombia: Medellin	wastewater	6.2442	-75.5812
SRR13706099	WGS	PRJNA648659	SAMN17910444	UNIVERSIDAD DE ANTIOQUIA	public	SRX10095037	Illumina NovaSeq 6000	Illumina NovaSeq	ES11	PAIRED	RANDOM	METAGENOMIC	aquatic metagenome	ILLUMINA	2021-05-26T00:00:00Z	E5	SRP273582	fastq,sra	gs,ncbi,s3	gs.US,ncbi.public,s3.us-east-1	1305212600	Colombia	South America	2017-06	302	4353955442	Metagenome or environmental	Colombia: Medellin	wastewater	6.2442	-75.5812
SRR12340499	WGS	PRJNA648659	SAMN15661654	UNIVERSIDAD DE ANTIOQUIA	public	SRX8840252	Illumina NovaSeq 6000	Illumina NovaSeq	TS10	PAIRED	RANDOM	METAGENOMIC	aquatic metagenome	ILLUMINA	2021-05-26T00:00:00Z	T5	SRP273582	fastq,sra	gs,ncbi,s3	gs.US,ncbi.public,s3.us-east-1	1440979946	Colombia	South America	2017-06	302	4837824372	Metagenome or environmental	Colombia: Medellin	wastewater	6.2442	-75.5812
SRR12327456	WGS	PRJNA648659	SAMN15647474	UNIVERSIDAD DE ANTIOQUIA	public	SRX8827676	Illumina NovaSeq 6000	Illumina NovaSeq	AS14	PAIRED	RANDOM	METAGENOMIC	aquatic metagenome	ILLUMINA	2021-05-26T00:00:00Z	AS14	SRP273582	fastq,sra	gs,ncbi,s3	gs.US,ncbi.public,s3.us-east-1	1247763777	Colombia	South America	2017-07	302	4186070018	Metagenome or environmental	Colombia: Medellin	wastewater	6.2442	-75.5812
SRR13706189	WGS	PRJNA648659	SAMN17910751	UNIVERSIDAD DE ANTIOQUIA	public	SRX10095127	Illumina NovaSeq 6000	Illumina NovaSeq	ES12	PAIRED	RANDOM	METAGENOMIC	aquatic metagenome	ILLUMINA	2021-05-26T00:00:00Z	E6	SRP273582	fastq,sra	gs,ncbi,s3	gs.US,ncbi.public,s3.us-east-1	1605316073	Colombia	South America	2017-07	302	5351314368	Metagenome or environmental	Colombia: Medellin	wastewater	6.2442	-75.5812
SRR12450756	WGS	PRJNA648659	SAMN15814997	UNIVERSIDAD DE ANTIOQUIA	public	SRX8945199	Illumina NovaSeq 6000	Illumina NovaSeq	LS14	PAIRED	RANDOM	METAGENOMIC	aquatic metagenome	ILLUMINA	2021-05-26T00:00:00Z	L6	SRP273582	fastq,sra	gs,ncbi,s3	gs.US,ncbi.public,s3.us-east-1	1409918971	Colombia	South America	2017-07	302	4746058954	Metagenome or environmental	Colombia: Medellin	wastewater	6.2442	-75.5812
SRR12341065	WGS	PRJNA648659	SAMN15662387	UNIVERSIDAD DE ANTIOQUIA	public	SRX8840773	Illumina NovaSeq 6000	Illumina NovaSeq	TS12	PAIRED	RANDOM	METAGENOMIC	aquatic metagenome	ILLUMINA	2021-05-26T00:00:00Z	T6	SRP273582	fastq,sra	gs,ncbi,s3	gs.US,ncbi.public,s3.us-east-1	1327437206	Colombia	South America	2017-07	302	4421573544	Metagenome or environmental	Colombia: Medellin	wastewater	6.2442	-75.5812
ERR2607458	WGS	PRJEB27054	SAMEA4700779	CENTRE FOR GENOMIC EPIDEMIOLOGY, NATIONAL FOOD INS	public	ERX2624114	Illumina HiSeq 3000		unspecified	PAIRED	RANDOM	METAGENOMIC	wastewater metagenome	ILLUMINA	2018-07-03T00:00:00Z	SAMEA4700779	ERP109094	sra,fastq	ncbi,s3,ena,gs	gs.US,ena,s3.us-east-1,ncbi.public	1004195777	Croatia	Europe	2016-01-02	302	2289494012		Croatia		45.7876	16.0792	2018-06-14	2018-06-14	2018-11-16	2018-05-31	SAMEA4700779	DTU-GE	Centre for Genomic Epidemiology\, National Food Institute\, Technical University of Denmark (DTU)\, Denmark	2018-06-14T17:03:25Z	2018-05-31T13:35:06Z	public	HRV-68_1	HRV-68_1		45.7876	16.0792	Centre for Genomic Epidemiology
ERR2607459	WGS	PRJEB27054	SAMEA4700780	CENTRE FOR GENOMIC EPIDEMIOLOGY, NATIONAL FOOD INS	public	ERX2624115	Illumina HiSeq 3000		unspecified	PAIRED	RANDOM	METAGENOMIC	wastewater metagenome	ILLUMINA	2018-07-03T00:00:00Z	SAMEA4700780	ERP109094	sra,fastq	gs,ncbi,s3,ena	gs.US,ena,ncbi.public,s3.us-east-1	438506594	Croatia	Europe	2016-01-02	302	942127354		Croatia		45.7876	16.0792	2018-06-14	2018-06-14	2018-11-16	2018-05-31	SAMEA4700780	DTU-GE	Centre for Genomic Epidemiology\, National Food Institute\, Technical University of Denmark (DTU)\, Denmark	2018-06-14T17:03:25Z	2018-05-31T13:35:06Z	public	HRV-68_2	HRV-68_2		45.7876	16.0792	Centre for Genomic Epidemiology
ERR2607460	WGS	PRJEB27054	SAMEA4700781	CENTRE FOR GENOMIC EPIDEMIOLOGY, NATIONAL FOOD INS	public	ERX2624116	Illumina HiSeq 3000		unspecified	PAIRED	RANDOM	METAGENOMIC	wastewater metagenome	ILLUMINA	2018-07-03T00:00:00Z	SAMEA4700781	ERP109094	fastq,sra	gs,ncbi,s3,ena	gs.US,ncbi.public,ena,s3.us-east-1	1208712352	Croatia	Europe	2016-01-02	302	2522117666		Croatia		45.7876	16.0792	2018-06-14	2018-06-14	2018-11-16	2018-05-31	SAMEA4700781	DTU-GE	Centre for Genomic Epidemiology\, National Food Institute\, Technical University of Denmark (DTU)\, Denmark	2018-06-14T17:03:25Z	2018-05-31T13:35:06Z	public	HRV-68_3	HRV-68_3		45.7876	16.0792	Centre for Genomic Epidemiology
ERR2607461	WGS	PRJEB27054	SAMEA4700782	CENTRE FOR GENOMIC EPIDEMIOLOGY, NATIONAL FOOD INS	public	ERX2624117	Illumina HiSeq 3000		unspecified	PAIRED	RANDOM	METAGENOMIC	wastewater metagenome	ILLUMINA	2018-07-03T00:00:00Z	SAMEA4700782	ERP109094	fastq,sra	ncbi,gs,ena,s3	ncbi.public,gs.US,s3.us-east-1,ena	1233526446	Croatia	Europe	2016-01-02	302	2453020368		Croatia		45.7876	16.0792	2018-06-14	2018-06-14	2018-11-16	2018-05-31	SAMEA4700782	DTU-GE	Centre for Genomic Epidemiology\, National Food Institute\, Technical University of Denmark (DTU)\, Denmark	2018-06-14T17:03:25Z	2018-05-31T13:35:06Z	public	HRV-68_4	HRV-68_4		45.7876	16.0792	Centre for Genomic Epidemiology
ERR2607462	WGS	PRJEB27054	SAMEA4700783	CENTRE FOR GENOMIC EPIDEMIOLOGY, NATIONAL FOOD INS	public	ERX2624118	Illumina HiSeq 3000		unspecified	PAIRED	RANDOM	METAGENOMIC	wastewater metagenome	ILLUMINA	2018-07-03T00:00:00Z	SAMEA4700783	ERP109094	fastq,sra	ena,ncbi,s3,gs	gs.US,ena,s3.us-east-1,ncbi.public	2090594564	Croatia	Europe	2016-01-02	302	4924462434		Croatia		45.7876	16.0792	2018-06-14	2018-06-14	2018-11-16	2018-05-31	SAMEA4700783	DTU-GE	Centre for Genomic Epidemiology\, National Food Institute\, Technical University of Denmark (DTU)\, Denmark	2018-06-14T17:03:25Z	2018-05-31T13:35:06Z	public	HRV-68	HRV-68		45.7876	16.0792	Centre for Genomic Epidemiology
ERR2592335	WGS	PRJEB13831	SAMEA4527628	DTU CGE	public	ERX2608611	Illumina HiSeq 3000	Illumina HiSeq	HRV.68_4	PAIRED	RANDOM	METAGENOMIC	wastewater metagenome	ILLUMINA	2019-02-08T00:00:00Z	SAMEA4527628	ERP015409	fastq,sra	ena,gs,ncbi,s3	ena,gs.US,ncbi.public,s3.us-east-1	1216625677	Croatia	Europe	2016-02-08						45.815	15.9819	2019-01-31	2019-01-31	2018-11-16	2016-10-31	SAMEA4527628	DTU	Technical University of Denmark	2019-01-31T17:02:41Z	2016-10-31T11:12:17Z	public	HRV.68	HRV.68	Croatia	45.8150? N	15.9819? E	Centre for Genomic Epidemiology	metagenome	wastewater treatment plant
ERR2592257	WGS	PRJEB13831	SAMEA4527628	DTU CGE	public	ERX2608533	Illumina HiSeq 3000	Illumina HiSeq	HRV.68_5	PAIRED	RANDOM	METAGENOMIC	wastewater metagenome	ILLUMINA	2019-02-08T00:00:00Z	SAMEA4527628	ERP015409	fastq,sra	ena,gs,ncbi,s3	ena,gs.US,ncbi.public,s3.us-east-1	1243586506	Croatia	Europe	2016-02-08						45.815	15.9819	2019-01-31	2019-01-31	2018-11-16	2016-10-31	SAMEA4527628	DTU	Technical University of Denmark	2019-01-31T17:02:41Z	2016-10-31T11:12:17Z	public	HRV.68	HRV.68	Croatia	45.8150? N	15.9819? E	Centre for Genomic Epidemiology	metagenome	wastewater treatment plant
ERR1713360	WGS	PRJEB13831	SAMEA4527628	DTU	public	ERX1783594	Illumina HiSeq 3000	Illumina HiSeq	HRV.68	PAIRED	RANDOM	METAGENOMIC	wastewater metagenome	ILLUMINA	2019-02-08T00:00:00Z	SAMEA4527628	ERP015409	fastq,sra	ena,gs,ncbi,s3	ena,gs.US,ncbi.public,s3.us-east-1	2109720842	Croatia	Europe	2016-02-08						45.815	15.9819	2019-01-31	2019-01-31	2018-11-16	2016-10-31	SAMEA4527628	DTU	Technical University of Denmark	2019-01-31T17:02:41Z	2016-10-31T11:12:17Z	public	HRV.68	HRV.68	Croatia	45.8150? N	15.9819? E	Centre for Genomic Epidemiology	metagenome	wastewater treatment plant
ERR1725976	WGS	PRJEB13831	SAMEA4527628	DTU	public	ERX1795961	Illumina HiSeq 3000	Illumina HiSeq	HRV.68_2	PAIRED	RANDOM	METAGENOMIC	wastewater metagenome	ILLUMINA	2019-02-08T00:00:00Z	SAMEA4527628	ERP015409	fastq,sra	ena,gs,ncbi,s3	ena,gs.US,ncbi.public,s3.us-east-1	1003815495	Croatia	Europe	2016-02-08	302	2288618212				45.815	15.9819	2019-01-31	2019-01-31	2018-11-16	2016-10-31	SAMEA4527628	DTU	Technical University of Denmark	2019-01-31T17:02:41Z	2016-10-31T11:12:17Z	public	HRV.68	HRV.68	Croatia	45.8150? N	15.9819? E	Centre for Genomic Epidemiology	metagenome	wastewater treatment plant
ERR1725977	WGS	PRJEB13831	SAMEA4527628	DTU	public	ERX1795962	Illumina HiSeq 3000	Illumina HiSeq	HRV>68_3	PAIRED	RANDOM	METAGENOMIC	wastewater metagenome	ILLUMINA	2019-02-08T00:00:00Z	SAMEA4527628	ERP015409	fastq,sra	ena,gs,ncbi,s3	ena,gs.US,ncbi.public,s3.us-east-1	442072007	Croatia	Europe	2016-02-08						45.815	15.9819	2019-01-31	2019-01-31	2018-11-16	2016-10-31	SAMEA4527628	DTU	Technical University of Denmark	2019-01-31T17:02:41Z	2016-10-31T11:12:17Z	public	HRV.68	HRV.68	Croatia	45.8150? N	15.9819? E	Centre for Genomic Epidemiology	metagenome	wastewater treatment plant
ERR2298129	WGS	PRJEB23496	SAMEA4527628	ERASMUS MC, UNIVERISTY MEDICAL CENTER	public	ERX2349655	Ion Torrent S5 XL	Ion Torrent S5 XL	Ion Xpress‚Ñ¢ Plus Fragment Library Kit	SINGLE	RANDOM	METAGENOMIC	wastewater metagenome	ION_TORRENT	2020-05-30T00:00:00Z	SAMEA4527628	ERP105254	sra	gs,ncbi,s3	gs.US,ncbi.public,s3.us-east-1	656686735	Croatia	Europe	2016-02-08	273	819383014				45.815	15.9819	2020-05-29	2019-01-31	2018-11-16	2016-10-31	SAMEA4527628	DTU	Technical University of Denmark	2019-01-31T17:02:41Z	2016-10-31T11:12:17Z	public	HRV.68	HRV.68	Croatia	45.8150? N	15.9819? E	Centre for Genomic Epidemiology	metagenome	wastewater treatment plant
ERR2683142	WGS	PRJEB27621	SAMEA4777399	CENTRE FOR GENOMIC EPIDEMIOLOGY, NATIONAL FOOD INS	public	ERX2697756	Illumina NovaSeq 6000		unspecified	PAIRED	RANDOM	METAGENOMIC	wastewater metagenome	ILLUMINA	2020-07-02T00:00:00Z	SAMEA4777399	ERP109726	sra	s3,gs,ncbi	gs.US,s3.us-east-1,ncbi.public	3991943564	Croatia	Europe	2017-06-07				Croatia		45.7877	16.0791	2020-07-01	2020-07-01	2018-11-16	2018-07-04	SAMEA4777399	DTU-GE	Centre for Genomic Epidemiology\, National Food Institute\, Technical University of Denmark (DTU)\, Denmark	2020-07-01T04:04:01Z	2018-07-04T17:53:39Z	public	DTU2017_MG_127_HR_ZA	DTU2017_MG_127_HR_ZA		45.7877	16.0791	Centre for Genomic Epidemiology
ERR4682337	WGS	PRJEB40815	SAMEA7428244	CENTRE FOR GENOMIC EPIDEMIOLOGY, NATIONAL FOOD INS	public	ERX4603789	Illumina NovaSeq 6000		unspecified	PAIRED	RANDOM	METAGENOMIC	wastewater metagenome	ILLUMINA	2021-06-25T00:00:00Z	SAMEA7428244	ERP124492	sra,fastq	s3,ncbi,gs	gs.US,ncbi.public,s3.us-east-1	4112366893	Croatia	Europe	2017-11-13	302	12739198352		Croatia		45.815	15.9819	2021-06-24	2021-06-24	2021-06-24	2021-06-24	SAMEA7428244	DTU-GE	Centre for Genomic Epidemiology\, National Food Institute\, Technical University of Denmark (DTU)\, Denmark	2021-06-24T12:26:19Z	2021-06-24T12:26:19Z	public	DTU_2017_496_1_MG_HR_ZA_192	DTU_2017_496_1_MG_HR_ZA_192				Centre for Genomic Epidemiology
ERR4682802	WGS	PRJEB40816	SAMEA7428444	CENTRE FOR GENOMIC EPIDEMIOLOGY, NATIONAL FOOD INS	public	ERX4604251	Illumina NovaSeq 6000		unspecified	PAIRED	RANDOM	METAGENOMIC	wastewater metagenome	ILLUMINA	2021-06-25T00:00:00Z	SAMEA7428444	ERP124493	fastq,sra	ncbi,s3,gs	s3.us-east-1,gs.US,ncbi.public	3791341785	Croatia	Europe	2018-07-02	291	11687349823		Croatia		45.815	15.9819	2021-06-24	2021-06-24	2021-06-24	2021-06-24	SAMEA7428444	DTU-GE	Centre for Genomic Epidemiology\, National Food Institute\, Technical University of Denmark (DTU)\, Denmark	2021-06-24T12:26:18Z	2021-06-24T12:26:18Z	public	DTU_2018_677_1_MG_HR_ZA_365	DTU_2018_677_1_MG_HR_ZA_365				Centre for Genomic Epidemiology
ERR4678572	WGS	PRJEB40798	SAMEA7426272	CENTRE FOR GENOMIC EPIDEMIOLOGY, NATIONAL FOOD INS	public	ERX4600196	Illumina NovaSeq 6000		unspecified	PAIRED	RANDOM	METAGENOMIC	wastewater metagenome	ILLUMINA	2021-06-25T00:00:00Z	SAMEA7426272	ERP124466	fastq,sra	gs,s3	gs.US,s3.us-east-1	4826902097	Croatia	Europe	2018-12-05	302	15731974260		Croatia		45.815	15.9819	2021-06-24	2021-06-24	2021-06-24	2021-06-24	SAMEA7426272	DTU-GE	Centre for Genomic Epidemiology\, National Food Institute\, Technical University of Denmark (DTU)\, Denmark	2021-06-24T12:26:12Z	2021-06-24T12:26:12Z	public	DTU_2018_814_1_MG_HR_ZA_498	DTU_2018_814_1_MG_HR_ZA_498				Centre for Genomic Epidemiology
ERR2607428	WGS	PRJEB27054	SAMEA4700749	CENTRE FOR GENOMIC EPIDEMIOLOGY, NATIONAL FOOD INS	public	ERX2624084	Illumina HiSeq 3000		unspecified	PAIRED	RANDOM	METAGENOMIC	wastewater metagenome	ILLUMINA	2018-07-03T00:00:00Z	SAMEA4700749	ERP109094	fastq,sra	ena,s3,ncbi,gs	s3.us-east-1,gs.US,ncbi.public,ena	1448291304	Czech Republic	Europe	2016-01-02	302	3075091444		Czech Republic		50.1138	14.4001	2018-06-14	2018-06-14	2018-11-16	2018-05-31	SAMEA4700749	DTU-GE	Centre for Genomic Epidemiology\, National Food Institute\, Technical University of Denmark (DTU)\, Denmark	2018-06-14T17:03:25Z	2018-05-31T13:35:06Z	public	CZE-23_1	CZE-23_1		50.1138	14.4001	Centre for Genomic Epidemiology
ERR2607429	WGS	PRJEB27054	SAMEA4700750	CENTRE FOR GENOMIC EPIDEMIOLOGY, NATIONAL FOOD INS	public	ERX2624085	Illumina HiSeq 3000		unspecified	PAIRED	RANDOM	METAGENOMIC	wastewater metagenome	ILLUMINA	2018-07-03T00:00:00Z	SAMEA4700750	ERP109094	sra,fastq	gs,ena,s3,ncbi	ena,gs.US,ncbi.public,s3.us-east-1	3903078454	Czech Republic	Europe	2016-01-02	302	7654499248		Czech Republic		50.1138	14.4001	2018-06-14	2018-06-14	2018-11-16	2018-05-31	SAMEA4700750	DTU-GE	Centre for Genomic Epidemiology\, National Food Institute\, Technical University of Denmark (DTU)\, Denmark	2018-06-14T17:03:25Z	2018-05-31T13:35:06Z	public	CZE-23_2	CZE-23_2		50.1138	14.4001	Centre for Genomic Epidemiology
ERR2607430	WGS	PRJEB27054	SAMEA4700751	CENTRE FOR GENOMIC EPIDEMIOLOGY, NATIONAL FOOD INS	public	ERX2624086	Illumina HiSeq 3000		unspecified	PAIRED	RANDOM	METAGENOMIC	wastewater metagenome	ILLUMINA	2018-07-03T00:00:00Z	SAMEA4700751	ERP109094	fastq,sra	gs,ena,ncbi,s3	ena,ncbi.public,s3.us-east-1,gs.US	4825227342	Czech Republic	Europe	2016-01-02	302	11464950122		Czech Republic		50.1138	14.4001	2018-06-14	2018-06-14	2018-11-16	2018-05-31	SAMEA4700751	DTU-GE	Centre for Genomic Epidemiology\, National Food Institute\, Technical University of Denmark (DTU)\, Denmark	2018-06-14T17:03:25Z	2018-05-31T13:35:06Z	public	CZE-23	CZE-23		50.1138	14.4001	Centre for Genomic Epidemiology
ERR2592253	WGS	PRJEB13831	SAMEA4527615	DTU CGE	public	ERX2608529	Illumina HiSeq 3000	Illumina HiSeq	CZE.23_3	PAIRED	RANDOM	METAGENOMIC	wastewater metagenome	ILLUMINA	2019-02-08T00:00:00Z	SAMEA4527615	ERP015409	fastq,sra	ena,gs,ncbi,s3	ena,gs.US,ncbi.public,s3.us-east-1	3927272190	Czech Republic	Europe	2016-02-01						49.1951	16.6068	2019-01-31	2019-01-31	2018-11-16	2016-10-31	SAMEA4527615	DTU	Technical University of Denmark	2019-01-31T17:02:41Z	2016-10-31T11:12:17Z	public	CZE.23	CZE.23	Czech Republic	49.1951? N	16.6068? E	Centre for Genomic Epidemiology	metagenome	wastewater treatment plant
ERR1713347	WGS	PRJEB13831	SAMEA4527615	DTU	public	ERX1783581	Illumina HiSeq 3000	Illumina HiSeq	CZE.23	PAIRED	RANDOM	METAGENOMIC	wastewater metagenome	ILLUMINA	2019-02-08T00:00:00Z	SAMEA4527615	ERP015409	fastq,sra	ena,gs,ncbi,s3	ena,gs.US,ncbi.public,s3.us-east-1	4862148903	Czech Republic	Europe	2016-02-01						49.1951	16.6068	2019-01-31	2019-01-31	2018-11-16	2016-10-31	SAMEA4527615	DTU	Technical University of Denmark	2019-01-31T17:02:41Z	2016-10-31T11:12:17Z	public	CZE.23	CZE.23	Czech Republic	49.1951? N	16.6068? E	Centre for Genomic Epidemiology	metagenome	wastewater treatment plant
ERR1725966	WGS	PRJEB13831	SAMEA4527615	DTU	public	ERX1795951	Illumina HiSeq 3000	Illumina HiSeq	CZE.23_2	PAIRED	RANDOM	METAGENOMIC	wastewater metagenome	ILLUMINA	2019-02-08T00:00:00Z	SAMEA4527615	ERP015409	fastq,sra	ena,gs,ncbi,s3	ena,gs.US,ncbi.public,s3.us-east-1	1457511010	Czech Republic	Europe	2016-02-01						49.1951	16.6068	2019-01-31	2019-01-31	2018-11-16	2016-10-31	SAMEA4527615	DTU	Technical University of Denmark	2019-01-31T17:02:41Z	2016-10-31T11:12:17Z	public	CZE.23	CZE.23	Czech Republic	49.1951? N	16.6068? E	Centre for Genomic Epidemiology	metagenome	wastewater treatment plant
ERR2298114	WGS	PRJEB23496	SAMEA4527615	ERASMUS MC, UNIVERISTY MEDICAL CENTER	public	ERX2349640	Ion Torrent S5 XL	Ion Torrent S5 XL	Ion Xpress‚Ñ¢ Plus Fragment Library Kit	SINGLE	RANDOM	METAGENOMIC	wastewater metagenome	ION_TORRENT	2020-05-30T00:00:00Z	SAMEA4527615	ERP105254	sra	gs,ncbi,s3	gs.US,ncbi.public,s3.us-east-1	1126474980	Czech Republic	Europe	2016-02-01	250	1424810478				49.1951	16.6068	2020-05-29	2019-01-31	2018-11-16	2016-10-31	SAMEA4527615	DTU	Technical University of Denmark	2019-01-31T17:02:41Z	2016-10-31T11:12:17Z	public	CZE.23	CZE.23	Czech Republic	49.1951? N	16.6068? E	Centre for Genomic Epidemiology	metagenome	wastewater treatment plant
ERR2683234	WGS	PRJEB27621	SAMEA4777491	CENTRE FOR GENOMIC EPIDEMIOLOGY, NATIONAL FOOD INS	public	ERX2697848	Illumina NovaSeq 6000		unspecified	PAIRED	RANDOM	METAGENOMIC	wastewater metagenome	ILLUMINA	2020-07-02T00:00:00Z	SAMEA4777491	ERP109726	sra	gs,s3,ncbi	gs.US,ncbi.public,s3.us-east-1	4145299692	Czech Republic	Europe	2017-06-13				Czech Republic		50.1128	14.3985	2020-07-01	2020-07-01	2018-11-16	2018-07-04	SAMEA4777491	DTU-GE	Centre for Genomic Epidemiology\, National Food Institute\, Technical University of Denmark (DTU)\, Denmark	2020-07-01T04:04:01Z	2018-07-04T17:53:43Z	public	DTU2017_MG_58_CZ_PR	DTU2017_MG_58_CZ_PR		50.1128	14.3985	Centre for Genomic Epidemiology
ERR2683235	WGS	PRJEB27621	SAMEA4777492	CENTRE FOR GENOMIC EPIDEMIOLOGY, NATIONAL FOOD INS	public	ERX2697849	Illumina NovaSeq 6000		unspecified	PAIRED	RANDOM	METAGENOMIC	wastewater metagenome	ILLUMINA	2020-07-02T00:00:00Z	SAMEA4777492	ERP109726	sra	gs,s3,ncbi	ncbi.public,gs.US,s3.us-east-1	3993695470	Czech Republic	Europe	2017-06-13				Czech Republic		49.1313	16.6295	2020-07-01	2020-07-01	2018-11-16	2018-07-04	SAMEA4777492	DTU-GE	Centre for Genomic Epidemiology\, National Food Institute\, Technical University of Denmark (DTU)\, Denmark	2020-07-01T04:04:01Z	2018-07-04T17:53:43Z	public	DTU2017_MG_59_CZ_BR	DTU2017_MG_59_CZ_BR		49.1313	16.6295	Centre for Genomic Epidemiology
ERR4682350	WGS	PRJEB40815	SAMEA7428257	CENTRE FOR GENOMIC EPIDEMIOLOGY, NATIONAL FOOD INS	public	ERX4603802	Illumina NovaSeq 6000		unspecified	PAIRED	RANDOM	METAGENOMIC	wastewater metagenome	ILLUMINA	2021-06-25T00:00:00Z	SAMEA7428257	ERP124492	fastq,sra	ncbi,s3,gs	ncbi.public,s3.us-east-1,gs.US	6088865769	Czech Republic	Europe	2017-11-20	302	18829899924		Czech Republic		49.1951	16.6068	2021-06-24	2021-06-24	2021-06-24	2021-06-24	SAMEA7428257	DTU-GE	Centre for Genomic Epidemiology\, National Food Institute\, Technical University of Denmark (DTU)\, Denmark	2021-06-24T12:26:18Z	2021-06-24T12:26:18Z	public	DTU_2017_509_1_MG_CZ_PR_205	DTU_2017_509_1_MG_CZ_PR_205				Centre for Genomic Epidemiology
ERR4682351	WGS	PRJEB40815	SAMEA7428258	CENTRE FOR GENOMIC EPIDEMIOLOGY, NATIONAL FOOD INS	public	ERX4603803	Illumina NovaSeq 6000		unspecified	PAIRED	RANDOM	METAGENOMIC	wastewater metagenome	ILLUMINA	2021-06-25T00:00:00Z	SAMEA7428258	ERP124492	fastq,sra	s3,ncbi,gs	s3.us-east-1,ncbi.public,gs.US	6849906782	Czech Republic	Europe	2017-11-22	302	21119955656		Czech Republic		49.1951	16.6068	2021-06-24	2021-06-24	2021-06-24	2021-06-24	SAMEA7428258	DTU-GE	Centre for Genomic Epidemiology\, National Food Institute\, Technical University of Denmark (DTU)\, Denmark	2021-06-24T12:26:18Z	2021-06-24T12:26:18Z	public	DTU_2017_510_1_MG_CZ_BR_206	DTU_2017_510_1_MG_CZ_BR_206				Centre for Genomic Epidemiology
ERR4682784	WGS	PRJEB40816	SAMEA7428426	CENTRE FOR GENOMIC EPIDEMIOLOGY, NATIONAL FOOD INS	public	ERX4604233	Illumina NovaSeq 6000		unspecified	PAIRED	RANDOM	METAGENOMIC	wastewater metagenome	ILLUMINA	2021-06-25T00:00:00Z	SAMEA7428426	ERP124493	sra,fastq	ncbi,s3,gs	gs.US,ncbi.public,s3.us-east-1	4034027700	Czech Republic	Europe	2018-06-20	297	12635714571		Czech Republic		49.1951	16.6068	2021-06-24	2021-06-24	2021-06-24	2021-06-24	SAMEA7428426	DTU-GE	Centre for Genomic Epidemiology\, National Food Institute\, Technical University of Denmark (DTU)\, Denmark	2021-06-24T12:26:18Z	2021-06-24T12:26:18Z	public	DTU_2018_658_1_MG_CZ_PR_346	DTU_2018_658_1_MG_CZ_PR_346				Centre for Genomic Epidemiology
ERR4682785	WGS	PRJEB40816	SAMEA7428427	CENTRE FOR GENOMIC EPIDEMIOLOGY, NATIONAL FOOD INS	public	ERX4604234	Illumina NovaSeq 6000		unspecified	PAIRED	RANDOM	METAGENOMIC	wastewater metagenome	ILLUMINA	2021-06-25T00:00:00Z	SAMEA7428427	ERP124493	fastq,sra	gs,s3	gs.US,s3.us-east-1	4106178715	Czech Republic	Europe	2018-06-20	296	12836005669		Czech Republic		49.1951	16.6068	2021-06-24	2021-06-24	2021-06-24	2021-06-24	SAMEA7428427	DTU-GE	Centre for Genomic Epidemiology\, National Food Institute\, Technical University of Denmark (DTU)\, Denmark	2021-06-24T12:26:18Z	2021-06-24T12:26:18Z	public	DTU_2018_659_1_MG_CZ_BR_347	DTU_2018_659_1_MG_CZ_BR_347				Centre for Genomic Epidemiology
ERR4678577	WGS	PRJEB40798	SAMEA7426277	CENTRE FOR GENOMIC EPIDEMIOLOGY, NATIONAL FOOD INS	public	ERX4600201	Illumina NovaSeq 6000		unspecified	PAIRED	RANDOM	METAGENOMIC	wastewater metagenome	ILLUMINA	2021-06-25T00:00:00Z	SAMEA7426277	ERP124466	sra,fastq	s3,ncbi,gs	gs.US,ncbi.public,s3.us-east-1	5129271359	Czech Republic	Europe	2018-12-04	302	17008896700		Czech Republic		49.1951	16.6068	2021-06-24	2021-06-24	2021-06-24	2021-06-24	SAMEA7426277	DTU-GE	Centre for Genomic Epidemiology\, National Food Institute\, Technical University of Denmark (DTU)\, Denmark	2021-06-24T12:26:12Z	2021-06-24T12:26:12Z	public	DTU_2018_819_1_MG_CZ_PR_503	DTU_2018_819_1_MG_CZ_PR_503				Centre for Genomic Epidemiology
ERR4678578	WGS	PRJEB40798	SAMEA7426278	CENTRE FOR GENOMIC EPIDEMIOLOGY, NATIONAL FOOD INS	public	ERX4600202	Illumina NovaSeq 6000		unspecified	PAIRED	RANDOM	METAGENOMIC	wastewater metagenome	ILLUMINA	2021-06-25T00:00:00Z	SAMEA7426278	ERP124466	sra,fastq	ncbi,gs,s3	gs.US,s3.us-east-1,ncbi.public	4816844042	Czech Republic	Europe	2018-12-05	302	15910269926		Czech Republic		49.1951	16.6068	2021-06-24	2021-06-24	2021-06-24	2021-06-24	SAMEA7426278	DTU-GE	Centre for Genomic Epidemiology\, National Food Institute\, Technical University of Denmark (DTU)\, Denmark	2021-06-24T12:26:12Z	2021-06-24T12:26:12Z	public	DTU_2018_820_1_MG_CZ_BR_504	DTU_2018_820_1_MG_CZ_BR_504				Centre for Genomic Epidemiology
ERR4678685	WGS	PRJEB40798	SAMEA7426385	CENTRE FOR GENOMIC EPIDEMIOLOGY, NATIONAL FOOD INS	public	ERX4600309	Illumina NovaSeq 6000		unspecified	PAIRED	RANDOM	METAGENOMIC	wastewater metagenome	ILLUMINA	2021-06-25T00:00:00Z	SAMEA7426385	ERP124466	fastq,sra	gs,ncbi,s3	ncbi.public,s3.us-east-1,gs.US	4492401720	Democratic Republic of the Congo	Africa	2018-11-17	302	14863843248		Democratic Republic of the Congo		-4.0383	21.7587	2021-06-24	2021-06-24	2021-06-24	2021-06-24	SAMEA7426385	DTU-GE	Centre for Genomic Epidemiology\, National Food Institute\, Technical University of Denmark (DTU)\, Denmark	2021-06-24T12:26:14Z	2021-06-24T12:26:14Z	public	DTU_2018_934_1_MG_CO_BU_616	DTU_2018_934_1_MG_CO_BU_616				Centre for Genomic Epidemiology
ERR4678686	WGS	PRJEB40798	SAMEA7426386	CENTRE FOR GENOMIC EPIDEMIOLOGY, NATIONAL FOOD INS	public	ERX4600310	Illumina NovaSeq 6000		unspecified	PAIRED	RANDOM	METAGENOMIC	wastewater metagenome	ILLUMINA	2021-06-25T00:00:00Z	SAMEA7426386	ERP124466	fastq,sra	ncbi,gs,s3	ncbi.public,gs.US,s3.us-east-1	8669820510	Democratic Republic of the Congo	Africa	2018-11-17	302	28521815898		Democratic Republic of the Congo		-4.0383	21.7587	2021-06-24	2021-06-24	2021-06-24	2021-06-24	SAMEA7426386	DTU-GE	Centre for Genomic Epidemiology\, National Food Institute\, Technical University of Denmark (DTU)\, Denmark	2021-06-24T12:26:14Z	2021-06-24T12:26:14Z	public	DTU_2018_936_1_MG_CO_BU_2_618	DTU_2018_936_1_MG_CO_BU_2_618				Centre for Genomic Epidemiology
ERR4678687	WGS	PRJEB40798	SAMEA7426387	CENTRE FOR GENOMIC EPIDEMIOLOGY, NATIONAL FOOD INS	public	ERX4600311	Illumina NovaSeq 6000		unspecified	PAIRED	RANDOM	METAGENOMIC	wastewater metagenome	ILLUMINA	2021-06-25T00:00:00Z	SAMEA7426387	ERP124466	sra,fastq	s3,ncbi,gs	s3.us-east-1,gs.US,ncbi.public	11193392031	Democratic Republic of the Congo	Africa	2018-11-17	302	37295683884		Democratic Republic of the Congo		-4.0383	21.7587	2021-06-24	2021-06-24	2021-06-24	2021-06-24	SAMEA7426387	DTU-GE	Centre for Genomic Epidemiology\, National Food Institute\, Technical University of Denmark (DTU)\, Denmark	2021-06-24T12:26:14Z	2021-06-24T12:26:14Z	public	DTU_2018_937_1_MG_CO_BU_3_619	DTU_2018_937_1_MG_CO_BU_3_619				Centre for Genomic Epidemiology
ERR4678688	WGS	PRJEB40798	SAMEA7426388	CENTRE FOR GENOMIC EPIDEMIOLOGY, NATIONAL FOOD INS	public	ERX4600312	Illumina NovaSeq 6000		unspecified	PAIRED	RANDOM	METAGENOMIC	wastewater metagenome	ILLUMINA	2021-06-25T00:00:00Z	SAMEA7426388	ERP124466	fastq,sra	gs,s3,ncbi	s3.us-east-1,ncbi.public,gs.US	2718072971	Democratic Republic of the Congo	Africa	2018-11-17	302	8999304342		Democratic Republic of the Congo		-4.0383	21.7587	2021-06-24	2021-06-24	2021-06-24	2021-06-24	SAMEA7426388	DTU-GE	Centre for Genomic Epidemiology\, National Food Institute\, Technical University of Denmark (DTU)\, Denmark	2021-06-24T12:26:14Z	2021-06-24T12:26:14Z	public	DTU_2018_938_1_MG_CO_BU_4_620	DTU_2018_938_1_MG_CO_BU_4_620				Centre for Genomic Epidemiology
ERR4678690	WGS	PRJEB40798	SAMEA7426390	CENTRE FOR GENOMIC EPIDEMIOLOGY, NATIONAL FOOD INS	public	ERX4600314	Illumina NovaSeq 6000		unspecified	PAIRED	RANDOM	METAGENOMIC	wastewater metagenome	ILLUMINA	2021-06-25T00:00:00Z	SAMEA7426390	ERP124466	fastq,sra	ncbi,gs,s3	ncbi.public,s3.us-east-1,gs.US	2713052239	Democratic Republic of the Congo	Africa	2018-12-18	302	8993894012		Democratic Republic of the Congo		-4.0383	21.7587	2021-06-24	2021-06-24	2021-06-24	2021-06-24	SAMEA7426390	DTU-GE	Centre for Genomic Epidemiology\, National Food Institute\, Technical University of Denmark (DTU)\, Denmark	2021-06-24T12:26:14Z	2021-06-24T12:26:14Z	public	DTU_2018_941_1_MG_CO_BU_7_623	DTU_2018_941_1_MG_CO_BU_7_623				Centre for Genomic Epidemiology
ERR4678692	WGS	PRJEB40798	SAMEA7426392	CENTRE FOR GENOMIC EPIDEMIOLOGY, NATIONAL FOOD INS	public	ERX4600316	Illumina NovaSeq 6000		unspecified	PAIRED	RANDOM	METAGENOMIC	wastewater metagenome	ILLUMINA	2021-06-25T00:00:00Z	SAMEA7426392	ERP124466	fastq,sra	s3,gs,ncbi	ncbi.public,gs.US,s3.us-east-1	2802110740	Democratic Republic of the Congo	Africa	2018-12-18	302	9275192214		Democratic Republic of the Congo		-4.0383	21.7587	2021-06-24	2021-06-24	2021-06-24	2021-06-24	SAMEA7426392	DTU-GE	Centre for Genomic Epidemiology\, National Food Institute\, Technical University of Denmark (DTU)\, Denmark	2021-06-24T12:26:14Z	2021-06-24T12:26:14Z	public	DTU_2018_943_1_MG_CO_BU_9_625	DTU_2018_943_1_MG_CO_BU_9_625				Centre for Genomic Epidemiology
ERR4678689	WGS	PRJEB40798	SAMEA7426389	CENTRE FOR GENOMIC EPIDEMIOLOGY, NATIONAL FOOD INS	public	ERX4600313	Illumina NovaSeq 6000		unspecified	PAIRED	RANDOM	METAGENOMIC	wastewater metagenome	ILLUMINA	2021-06-25T00:00:00Z	SAMEA7426389	ERP124466	fastq,sra	ncbi,s3,gs	gs.US,ncbi.public,s3.us-east-1	2824895211	Democratic Republic of the Congo	Africa	2018-12-18	302	9413066388		Democratic Republic of the Congo		-4.0383	21.7587	2021-06-24	2021-06-24	2021-06-24	2021-06-24	SAMEA7426389	DTU-GE	Centre for Genomic Epidemiology\, National Food Institute\, Technical University of Denmark (DTU)\, Denmark	2021-06-24T12:26:14Z	2021-06-24T12:26:14Z	public	DTU_2018_939_1_MG_CO_BU_5_621	DTU_2018_939_1_MG_CO_BU_5_621				Centre for Genomic Epidemiology
ERR4678691	WGS	PRJEB40798	SAMEA7426391	CENTRE FOR GENOMIC EPIDEMIOLOGY, NATIONAL FOOD INS	public	ERX4600315	Illumina NovaSeq 6000		unspecified	PAIRED	RANDOM	METAGENOMIC	wastewater metagenome	ILLUMINA	2021-06-25T00:00:00Z	SAMEA7426391	ERP124466	sra,fastq	ncbi,s3,gs	ncbi.public,s3.us-east-1,gs.US	5103791494	Democratic Republic of the Congo	Africa	2018-12-18	302	16977001574		Democratic Republic of the Congo		-4.0383	21.7587	2021-06-24	2021-06-24	2021-06-24	2021-06-24	SAMEA7426391	DTU-GE	Centre for Genomic Epidemiology\, National Food Institute\, Technical University of Denmark (DTU)\, Denmark	2021-06-24T12:26:14Z	2021-06-24T12:26:14Z	public	DTU_2018_942_1_MG_CO_BU_8_624	DTU_2018_942_1_MG_CO_BU_8_624				Centre for Genomic Epidemiology
ERR2683197	WGS	PRJEB27621	SAMEA4777454	CENTRE FOR GENOMIC EPIDEMIOLOGY, NATIONAL FOOD INS	public	ERX2697811	Illumina NovaSeq 6000		unspecified	PAIRED	RANDOM	METAGENOMIC	wastewater metagenome	ILLUMINA	2020-07-02T00:00:00Z	SAMEA4777454	ERP109726	sra	ncbi,gs,s3	s3.us-east-1,gs.US,ncbi.public	2904878029	Denmark	Europe	2007-06-15				Denmark		55.6405	12.5058	2020-07-01	2020-07-01	2018-11-16	2018-07-04	SAMEA4777454	DTU-GE	Centre for Genomic Epidemiology\, National Food Institute\, Technical University of Denmark (DTU)\, Denmark	2020-07-01T04:04:01Z	2018-07-04T17:53:42Z	public	DTU2017_MG_24_DK_AV	DTU2017_MG_24_DK_AV		55.6405	12.5058	Centre for Genomic Epidemiology
ERR3562861	WGS	PRJEB34633	SAMEA5982134	CENTRE FOR GENOMIC EPIDEMIOLOGY, NATIONAL FOOD INS	public	ERX3561360	NextSeq 550	Illumina NextSeq	unspecified	PAIRED	RANDOM	METAGENOMIC	wastewater metagenome	ILLUMINA	2019-10-02T00:00:00Z	SAMEA5982134	ERP117567	sra	gs,ncbi,s3	gs.US,ncbi.public,s3.us-east-1	5320541284	Denmark	Europe	2015-11-20						55.695	12.6147	2019-09-30	2019-09-30	2019-09-28	2019-09-28	SAMEA5982134	DTU-GE	Centre for Genomic Epidemiology\, National Food Institute\, Technical University of Denmark (DTU)\, Denmark	2019-09-30T17:04:26Z	2019-09-28T07:10:37Z	public	DTU2017-1295-PRJ1066-CPH-Sewage-33	DTU2017-1295-PRJ1066-CPH-Sewage-33	Denmark	55.695	12.6147	Centre for Genomic Epidemiology
ERR3562836	WGS	PRJEB34633	SAMEA5982109	CENTRE FOR GENOMIC EPIDEMIOLOGY, NATIONAL FOOD INS	public	ERX3561335	NextSeq 550	Illumina NextSeq	unspecified	PAIRED	RANDOM	METAGENOMIC	wastewater metagenome	ILLUMINA	2019-10-02T00:00:00Z	SAMEA5982109	ERP117567	sra	gs,ncbi,s3	gs.US,ncbi.public,s3.us-east-1	3486972345	Denmark	Europe	2015-11-23						55.6083	12.4503	2019-09-30	2019-09-30	2019-09-28	2019-09-28	SAMEA5982109	DTU-GE	Centre for Genomic Epidemiology\, National Food Institute\, Technical University of Denmark (DTU)\, Denmark	2019-09-30T17:04:26Z	2019-09-28T07:10:36Z	public	DTU2019-229-PRJ1066-RA-CPH-Sewage-1	DTU2019-229-PRJ1066-RA-CPH-Sewage-1	Denmark	55.6083	12.4503	Centre for Genomic Epidemiology
ERR3562862	WGS	PRJEB34633	SAMEA5982135	CENTRE FOR GENOMIC EPIDEMIOLOGY, NATIONAL FOOD INS	public	ERX3561361	NextSeq 550	Illumina NextSeq	unspecified	PAIRED	RANDOM	METAGENOMIC	wastewater metagenome	ILLUMINA	2019-10-02T00:00:00Z	SAMEA5982135	ERP117567	sra	gs,ncbi,s3	gs.US,ncbi.public,s3.us-east-1	3176418014	Denmark	Europe	2015-11-25						55.695	12.6147	2019-09-30	2019-09-30	2019-09-28	2019-09-28	SAMEA5982135	DTU-GE	Centre for Genomic Epidemiology\, National Food Institute\, Technical University of Denmark (DTU)\, Denmark	2019-09-30T17:04:26Z	2019-09-28T07:10:37Z	public	DTU2017-1296-PRJ1066-CPH-Sewage-34	DTU2017-1296-PRJ1066-CPH-Sewage-34	Denmark	55.695	12.6147	Centre for Genomic Epidemiology
ERR3562843	WGS	PRJEB34633	SAMEA5982116	CENTRE FOR GENOMIC EPIDEMIOLOGY, NATIONAL FOOD INS	public	ERX3561342	NextSeq 550	Illumina NextSeq	unspecified	PAIRED	RANDOM	METAGENOMIC	wastewater metagenome	ILLUMINA	2019-10-02T00:00:00Z	SAMEA5982116	ERP117567	sra	gs,ncbi,s3	gs.US,ncbi.public,s3.us-east-1	2167233487	Denmark	Europe	2015-12-01						55.6083	12.4503	2019-09-30	2019-09-30	2019-09-28	2019-09-28	SAMEA5982116	DTU-GE	Centre for Genomic Epidemiology\, National Food Institute\, Technical University of Denmark (DTU)\, Denmark	2019-09-30T17:04:26Z	2019-09-28T07:10:37Z	public	DTU2017-1283-PRJ1066-CPH-Sewage-12	DTU2017-1283-PRJ1066-CPH-Sewage-12	Denmark	55.6083	12.4503	Centre for Genomic Epidemiology
ERR3562863	WGS	PRJEB34633	SAMEA5982136	CENTRE FOR GENOMIC EPIDEMIOLOGY, NATIONAL FOOD INS	public	ERX3561362	NextSeq 550	Illumina NextSeq	unspecified	PAIRED	RANDOM	METAGENOMIC	wastewater metagenome	ILLUMINA	2019-10-02T00:00:00Z	SAMEA5982136	ERP117567	sra	gs,ncbi,s3	gs.US,ncbi.public,s3.us-east-1	3373000589	Denmark	Europe	2015-12-01						55.695	12.6147	2019-09-30	2019-09-30	2019-09-28	2019-09-28	SAMEA5982136	DTU-GE	Centre for Genomic Epidemiology\, National Food Institute\, Technical University of Denmark (DTU)\, Denmark	2019-09-30T17:04:26Z	2019-09-28T07:10:37Z	public	DTU2017-1297-PRJ1066-CPH-Sewage-35	DTU2017-1297-PRJ1066-CPH-Sewage-35	Denmark	55.695	12.6147	Centre for Genomic Epidemiology
ERR3562837	WGS	PRJEB34633	SAMEA5982110	CENTRE FOR GENOMIC EPIDEMIOLOGY, NATIONAL FOOD INS	public	ERX3561336	NextSeq 550	Illumina NextSeq	unspecified	PAIRED	RANDOM	METAGENOMIC	wastewater metagenome	ILLUMINA	2019-10-02T00:00:00Z	SAMEA5982110	ERP117567	sra	gs,ncbi,s3	gs.US,ncbi.public,s3.us-east-1	5535824090	Denmark	Europe	2015-12-02						55.6083	12.4503	2019-09-30	2019-09-30	2019-09-28	2019-09-28	SAMEA5982110	DTU-GE	Centre for Genomic Epidemiology\, National Food Institute\, Technical University of Denmark (DTU)\, Denmark	2019-09-30T17:04:26Z	2019-09-28T07:10:36Z	public	DTU2019-230-PRJ1066-RA-CPH-Sewage-2	DTU2019-230-PRJ1066-RA-CPH-Sewage-2	Denmark	55.6083	12.4503	Centre for Genomic Epidemiology
ERR3562844	WGS	PRJEB34633	SAMEA5982117	CENTRE FOR GENOMIC EPIDEMIOLOGY, NATIONAL FOOD INS	public	ERX3561343	NextSeq 550	Illumina NextSeq	unspecified	PAIRED	RANDOM	METAGENOMIC	wastewater metagenome	ILLUMINA	2019-10-02T00:00:00Z	SAMEA5982117	ERP117567	sra	gs,ncbi,s3	gs.US,ncbi.public,s3.us-east-1	1567748122	Denmark	Europe	2015-12-06						55.6406	12.5056	2019-09-30	2019-09-30	2019-09-28	2019-09-28	SAMEA5982117	DTU-GE	Centre for Genomic Epidemiology\, National Food Institute\, Technical University of Denmark (DTU)\, Denmark	2019-09-30T17:04:26Z	2019-09-28T07:10:37Z	public	DTU2017-1284-PRJ1066-CPH-Sewage-14	DTU2017-1284-PRJ1066-CPH-Sewage-14	Denmark	55.6406	12.5056	Centre for Genomic Epidemiology
ERR3562845	WGS	PRJEB34633	SAMEA5982118	CENTRE FOR GENOMIC EPIDEMIOLOGY, NATIONAL FOOD INS	public	ERX3561344	NextSeq 550	Illumina NextSeq	unspecified	PAIRED	RANDOM	METAGENOMIC	wastewater metagenome	ILLUMINA	2019-10-02T00:00:00Z	SAMEA5982118	ERP117567	sra	gs,ncbi,s3	gs.US,ncbi.public,s3.us-east-1	1646363193	Denmark	Europe	2015-12-07						55.6406	12.5056	2019-09-30	2019-09-30	2019-09-28	2019-09-28	SAMEA5982118	DTU-GE	Centre for Genomic Epidemiology\, National Food Institute\, Technical University of Denmark (DTU)\, Denmark	2019-09-30T17:04:26Z	2019-09-28T07:10:37Z	public	DTU2017-1285-PRJ1066-CPH-Sewage-15	DTU2017-1285-PRJ1066-CPH-Sewage-15	Denmark	55.6406	12.5056	Centre for Genomic Epidemiology
ERR3562846	WGS	PRJEB34633	SAMEA5982119	CENTRE FOR GENOMIC EPIDEMIOLOGY, NATIONAL FOOD INS	public	ERX3561345	NextSeq 550	Illumina NextSeq	unspecified	PAIRED	RANDOM	METAGENOMIC	wastewater metagenome	ILLUMINA	2019-10-02T00:00:00Z	SAMEA5982119	ERP117567	sra	gs,ncbi,s3	gs.US,ncbi.public,s3.us-east-1	1525640323	Denmark	Europe	2015-12-09						55.6406	12.5056	2019-09-30	2019-09-30	2019-09-28	2019-09-28	SAMEA5982119	DTU-GE	Centre for Genomic Epidemiology\, National Food Institute\, Technical University of Denmark (DTU)\, Denmark	2019-09-30T17:04:26Z	2019-09-28T07:10:37Z	public	DTU2017-1286-PRJ1066-CPH-Sewage-16	DTU2017-1286-PRJ1066-CPH-Sewage-16	Denmark	55.6406	12.5056	Centre for Genomic Epidemiology
ERR3562864	WGS	PRJEB34633	SAMEA5982137	CENTRE FOR GENOMIC EPIDEMIOLOGY, NATIONAL FOOD INS	public	ERX3561363	NextSeq 550	Illumina NextSeq	unspecified	PAIRED	RANDOM	METAGENOMIC	wastewater metagenome	ILLUMINA	2019-10-02T00:00:00Z	SAMEA5982137	ERP117567	sra	gs,ncbi,s3	gs.US,ncbi.public,s3.us-east-1	3665948225	Denmark	Europe	2015-12-09						55.695	12.6147	2019-09-30	2019-09-30	2019-09-28	2019-09-28	SAMEA5982137	DTU-GE	Centre for Genomic Epidemiology\, National Food Institute\, Technical University of Denmark (DTU)\, Denmark	2019-09-30T17:04:26Z	2019-09-28T07:10:37Z	public	DTU2017-1298-PRJ1066-CPH-Sewage-36	DTU2017-1298-PRJ1066-CPH-Sewage-36	Denmark	55.695	12.6147	Centre for Genomic Epidemiology
ERR3562847	WGS	PRJEB34633	SAMEA5982120	CENTRE FOR GENOMIC EPIDEMIOLOGY, NATIONAL FOOD INS	public	ERX3561346	NextSeq 550	Illumina NextSeq	unspecified	PAIRED	RANDOM	METAGENOMIC	wastewater metagenome	ILLUMINA	2019-10-02T00:00:00Z	SAMEA5982120	ERP117567	sra	gs,ncbi,s3	gs.US,ncbi.public,s3.us-east-1	1520695787	Denmark	Europe	2015-12-12						55.6406	12.5056	2019-09-30	2019-09-30	2019-09-28	2019-09-28	SAMEA5982120	DTU-GE	Centre for Genomic Epidemiology\, National Food Institute\, Technical University of Denmark (DTU)\, Denmark	2019-09-30T17:04:26Z	2019-09-28T07:10:37Z	public	DTU2017-1287-PRJ1066-CPH-Sewage-17	DTU2017-1287-PRJ1066-CPH-Sewage-17	Denmark	55.6406	12.5056	Centre for Genomic Epidemiology
ERR3562865	WGS	PRJEB34633	SAMEA5982138	CENTRE FOR GENOMIC EPIDEMIOLOGY, NATIONAL FOOD INS	public	ERX3561364	NextSeq 550	Illumina NextSeq	unspecified	PAIRED	RANDOM	METAGENOMIC	wastewater metagenome	ILLUMINA	2019-10-02T00:00:00Z	SAMEA5982138	ERP117567	sra	gs,ncbi,s3	gs.US,ncbi.public,s3.us-east-1	4704143297	Denmark	Europe	2015-12-15						55.695	12.6147	2019-09-30	2019-09-30	2019-09-28	2019-09-28	SAMEA5982138	DTU-GE	Centre for Genomic Epidemiology\, National Food Institute\, Technical University of Denmark (DTU)\, Denmark	2019-09-30T17:04:26Z	2019-09-28T07:10:37Z	public	DTU2017-1299-PRJ1066-CPH-Sewage-37	DTU2017-1299-PRJ1066-CPH-Sewage-37	Denmark	55.695	12.6147	Centre for Genomic Epidemiology
ERR3562848	WGS	PRJEB34633	SAMEA5982121	CENTRE FOR GENOMIC EPIDEMIOLOGY, NATIONAL FOOD INS	public	ERX3561347	NextSeq 550	Illumina NextSeq	unspecified	PAIRED	RANDOM	METAGENOMIC	wastewater metagenome	ILLUMINA	2019-10-02T00:00:00Z	SAMEA5982121	ERP117567	sra	gs,ncbi,s3	gs.US,ncbi.public,s3.us-east-1	1917696224	Denmark	Europe	2015-12-17						55.6406	12.5056	2019-09-30	2019-09-30	2019-09-28	2019-09-28	SAMEA5982121	DTU-GE	Centre for Genomic Epidemiology\, National Food Institute\, Technical University of Denmark (DTU)\, Denmark	2019-09-30T17:04:26Z	2019-09-28T07:10:37Z	public	DTU2017-1288-PRJ1066-CPH-Sewage-18	DTU2017-1288-PRJ1066-CPH-Sewage-18	Denmark	55.6406	12.5056	Centre for Genomic Epidemiology
ERR3562866	WGS	PRJEB34633	SAMEA5982139	CENTRE FOR GENOMIC EPIDEMIOLOGY, NATIONAL FOOD INS	public	ERX3561365	NextSeq 550	Illumina NextSeq	unspecified	PAIRED	RANDOM	METAGENOMIC	wastewater metagenome	ILLUMINA	2019-10-02T00:00:00Z	SAMEA5982139	ERP117567	sra	gs,ncbi,s3	gs.US,ncbi.public,s3.us-east-1	5348421468	Denmark	Europe	2015-12-17						55.695	12.6147	2019-09-30	2019-09-30	2019-09-28	2019-09-28	SAMEA5982139	DTU-GE	Centre for Genomic Epidemiology\, National Food Institute\, Technical University of Denmark (DTU)\, Denmark	2019-09-30T17:04:26Z	2019-09-28T07:10:37Z	public	DTU2017-1300-PRJ1066-CPH-Sewage-38	DTU2017-1300-PRJ1066-CPH-Sewage-38	Denmark	55.695	12.6147	Centre for Genomic Epidemiology
ERR3562849	WGS	PRJEB34633	SAMEA5982122	CENTRE FOR GENOMIC EPIDEMIOLOGY, NATIONAL FOOD INS	public	ERX3561348	NextSeq 550	Illumina NextSeq	unspecified	PAIRED	RANDOM	METAGENOMIC	wastewater metagenome	ILLUMINA	2019-10-02T00:00:00Z	SAMEA5982122	ERP117567	sra	gs,ncbi,s3	gs.US,ncbi.public,s3.us-east-1	3486273628	Denmark	Europe	2015-12-21						55.6406	12.5056	2019-09-30	2019-09-30	2019-09-28	2019-09-28	SAMEA5982122	DTU-GE	Centre for Genomic Epidemiology\, National Food Institute\, Technical University of Denmark (DTU)\, Denmark	2019-09-30T17:04:26Z	2019-09-28T07:10:37Z	public	DTU2017-1289-PRJ1066-CPH-Sewage-19	DTU2017-1289-PRJ1066-CPH-Sewage-19	Denmark	55.6406	12.5056	Centre for Genomic Epidemiology
ERR3562867	WGS	PRJEB34633	SAMEA5982140	CENTRE FOR GENOMIC EPIDEMIOLOGY, NATIONAL FOOD INS	public	ERX3561366	NextSeq 550	Illumina NextSeq	unspecified	PAIRED	RANDOM	METAGENOMIC	wastewater metagenome	ILLUMINA	2019-10-02T00:00:00Z	SAMEA5982140	ERP117567	sra	gs,ncbi,s3	gs.US,ncbi.public,s3.us-east-1	4858549006	Denmark	Europe	2015-12-21						55.695	12.6147	2019-09-30	2019-09-30	2019-09-28	2019-09-28	SAMEA5982140	DTU-GE	Centre for Genomic Epidemiology\, National Food Institute\, Technical University of Denmark (DTU)\, Denmark	2019-09-30T17:04:26Z	2019-09-28T07:10:37Z	public	DTU2017-1301-PRJ1066-CPH-Sewage-39	DTU2017-1301-PRJ1066-CPH-Sewage-39	Denmark	55.695	12.6147	Centre for Genomic Epidemiology
ERR3562850	WGS	PRJEB34633	SAMEA5982123	CENTRE FOR GENOMIC EPIDEMIOLOGY, NATIONAL FOOD INS	public	ERX3561349	NextSeq 550	Illumina NextSeq	unspecified	PAIRED	RANDOM	METAGENOMIC	wastewater metagenome	ILLUMINA	2019-10-02T00:00:00Z	SAMEA5982123	ERP117567	sra	gs,ncbi,s3	gs.US,ncbi.public,s3.us-east-1	3659332950	Denmark	Europe	2015-12-28						55.6406	12.5056	2019-09-30	2019-09-30	2019-09-28	2019-09-28	SAMEA5982123	DTU-GE	Centre for Genomic Epidemiology\, National Food Institute\, Technical University of Denmark (DTU)\, Denmark	2019-09-30T17:04:26Z	2019-09-28T07:10:37Z	public	DTU2017-1290-PRJ1066-CPH-Sewage-20	DTU2017-1290-PRJ1066-CPH-Sewage-20	Denmark	55.6406	12.5056	Centre for Genomic Epidemiology
ERR3562868	WGS	PRJEB34633	SAMEA5982141	CENTRE FOR GENOMIC EPIDEMIOLOGY, NATIONAL FOOD INS	public	ERX3561367	NextSeq 550	Illumina NextSeq	unspecified	PAIRED	RANDOM	METAGENOMIC	wastewater metagenome	ILLUMINA	2019-10-02T00:00:00Z	SAMEA5982141	ERP117567	sra	gs,ncbi,s3	gs.US,ncbi.public,s3.us-east-1	4038665331	Denmark	Europe	2015-12-28						55.695	12.6147	2019-09-30	2019-09-30	2019-09-28	2019-09-28	SAMEA5982141	DTU-GE	Centre for Genomic Epidemiology\, National Food Institute\, Technical University of Denmark (DTU)\, Denmark	2019-09-30T17:04:26Z	2019-09-28T07:10:37Z	public	DTU2017-1302-PRJ1066-CPH-Sewage-40	DTU2017-1302-PRJ1066-CPH-Sewage-40	Denmark	55.695	12.6147	Centre for Genomic Epidemiology
ERR3562851	WGS	PRJEB34633	SAMEA5982124	CENTRE FOR GENOMIC EPIDEMIOLOGY, NATIONAL FOOD INS	public	ERX3561350	NextSeq 550	Illumina NextSeq	unspecified	PAIRED	RANDOM	METAGENOMIC	wastewater metagenome	ILLUMINA	2019-10-02T00:00:00Z	SAMEA5982124	ERP117567	sra	gs,ncbi,s3	gs.US,ncbi.public,s3.us-east-1	2171351458	Denmark	Europe	2015-12-29						55.6406	12.5056	2019-09-30	2019-09-30	2019-09-28	2019-09-28	SAMEA5982124	DTU-GE	Centre for Genomic Epidemiology\, National Food Institute\, Technical University of Denmark (DTU)\, Denmark	2019-09-30T17:04:26Z	2019-09-28T07:10:37Z	public	DTU2017-1291-PRJ1066-CPH-Sewage-21	DTU2017-1291-PRJ1066-CPH-Sewage-21	Denmark	55.6406	12.5056	Centre for Genomic Epidemiology
ERR3562869	WGS	PRJEB34633	SAMEA5982142	CENTRE FOR GENOMIC EPIDEMIOLOGY, NATIONAL FOOD INS	public	ERX3561368	NextSeq 550	Illumina NextSeq	unspecified	PAIRED	RANDOM	METAGENOMIC	wastewater metagenome	ILLUMINA	2019-10-02T00:00:00Z	SAMEA5982142	ERP117567	sra	gs,ncbi,s3	gs.US,ncbi.public,s3.us-east-1	4423735866	Denmark	Europe	2015-12-29						55.695	12.6147	2019-09-30	2019-09-30	2019-09-28	2019-09-28	SAMEA5982142	DTU-GE	Centre for Genomic Epidemiology\, National Food Institute\, Technical University of Denmark (DTU)\, Denmark	2019-09-30T17:04:26Z	2019-09-28T07:10:37Z	public	DTU2017-1303-PRJ1066-CPH-Sewage-41	DTU2017-1303-PRJ1066-CPH-Sewage-41	Denmark	55.695	12.6147	Centre for Genomic Epidemiology
ERR3562852	WGS	PRJEB34633	SAMEA5982125	CENTRE FOR GENOMIC EPIDEMIOLOGY, NATIONAL FOOD INS	public	ERX3561351	NextSeq 550	Illumina NextSeq	unspecified	PAIRED	RANDOM	METAGENOMIC	wastewater metagenome	ILLUMINA	2019-10-02T00:00:00Z	SAMEA5982125	ERP117567	sra	gs,ncbi,s3	gs.US,ncbi.public,s3.us-east-1	6289329392	Denmark	Europe	2016-01-05						55.6406	12.5056	2019-09-30	2019-09-30	2019-09-28	2019-09-28	SAMEA5982125	DTU-GE	Centre for Genomic Epidemiology\, National Food Institute\, Technical University of Denmark (DTU)\, Denmark	2019-09-30T17:04:26Z	2019-09-28T07:10:37Z	public	DTU2017-1292-PRJ1066-CPH-Sewage-22	DTU2017-1292-PRJ1066-CPH-Sewage-22	Denmark	55.6406	12.5056	Centre for Genomic Epidemiology
ERR3562870	WGS	PRJEB34633	SAMEA5982143	CENTRE FOR GENOMIC EPIDEMIOLOGY, NATIONAL FOOD INS	public	ERX3561369	NextSeq 550	Illumina NextSeq	unspecified	PAIRED	RANDOM	METAGENOMIC	wastewater metagenome	ILLUMINA	2019-10-02T00:00:00Z	SAMEA5982143	ERP117567	sra	gs,ncbi,s3	gs.US,ncbi.public,s3.us-east-1	4552866856	Denmark	Europe	2016-01-05						55.695	12.6147	2019-09-30	2019-09-30	2019-09-28	2019-09-28	SAMEA5982143	DTU-GE	Centre for Genomic Epidemiology\, National Food Institute\, Technical University of Denmark (DTU)\, Denmark	2019-09-30T17:04:26Z	2019-09-28T07:10:37Z	public	DTU2017-1304-PRJ1066-CPH-Sewage-42	DTU2017-1304-PRJ1066-CPH-Sewage-42	Denmark	55.695	12.6147	Centre for Genomic Epidemiology
ERR3562838	WGS	PRJEB34633	SAMEA5982111	CENTRE FOR GENOMIC EPIDEMIOLOGY, NATIONAL FOOD INS	public	ERX3561337	Illumina MiSeq	Illumina MiSeq	unspecified	PAIRED	RANDOM	METAGENOMIC	wastewater metagenome	ILLUMINA	2019-10-02T00:00:00Z	SAMEA5982111	ERP117567	sra	gs,ncbi,s3	gs.US,ncbi.public,s3.us-east-1	962451634	Denmark	Europe	2016-01-09						55.6083	12.4503	2019-09-30	2019-09-30	2019-09-28	2019-09-28	SAMEA5982111	DTU-GE	Centre for Genomic Epidemiology\, National Food Institute\, Technical University of Denmark (DTU)\, Denmark	2019-09-30T17:04:26Z	2019-09-28T07:10:36Z	public	DTU2017-586-PRJ1066-RA-Sewage-3_S5_L001	DTU2017-586-PRJ1066-RA-Sewage-3_S5_L001	Denmark	55.6083	12.4503	Centre for Genomic Epidemiology
ERR3562853	WGS	PRJEB34633	SAMEA5982126	CENTRE FOR GENOMIC EPIDEMIOLOGY, NATIONAL FOOD INS	public	ERX3561352	NextSeq 550	Illumina NextSeq	unspecified	PAIRED	RANDOM	METAGENOMIC	wastewater metagenome	ILLUMINA	2019-10-02T00:00:00Z	SAMEA5982126	ERP117567	sra	gs,ncbi,s3	gs.US,ncbi.public,s3.us-east-1	3558552614	Denmark	Europe	2016-01-09						55.6406	12.5056	2019-09-30	2019-09-30	2019-09-28	2019-09-28	SAMEA5982126	DTU-GE	Centre for Genomic Epidemiology\, National Food Institute\, Technical University of Denmark (DTU)\, Denmark	2019-09-30T17:04:26Z	2019-09-28T07:10:37Z	public	DTU2017-1293-PRJ1066-CPH-Sewage-23	DTU2017-1293-PRJ1066-CPH-Sewage-23	Denmark	55.6406	12.5056	Centre for Genomic Epidemiology
ERR3562839	WGS	PRJEB34633	SAMEA5982112	CENTRE FOR GENOMIC EPIDEMIOLOGY, NATIONAL FOOD INS	public	ERX3561338	Illumina MiSeq	Illumina MiSeq	unspecified	PAIRED	RANDOM	METAGENOMIC	wastewater metagenome	ILLUMINA	2019-10-02T00:00:00Z	SAMEA5982112	ERP117567	sra	gs,ncbi,s3	gs.US,ncbi.public,s3.us-east-1	1048342326	Denmark	Europe	2016-01-11						55.6083	12.4503	2019-09-30	2019-09-30	2019-09-28	2019-09-28	SAMEA5982112	DTU-GE	Centre for Genomic Epidemiology\, National Food Institute\, Technical University of Denmark (DTU)\, Denmark	2019-09-30T17:04:26Z	2019-09-28T07:10:36Z	public	DTU2017-587-PRJ1066-RA-Sewage-4_S6_L001	DTU2017-587-PRJ1066-RA-Sewage-4_S6_L001	Denmark	55.6083	12.4503	Centre for Genomic Epidemiology
ERR3562871	WGS	PRJEB34633	SAMEA5982144	CENTRE FOR GENOMIC EPIDEMIOLOGY, NATIONAL FOOD INS	public	ERX3561370	Illumina MiSeq	Illumina MiSeq	unspecified	PAIRED	RANDOM	METAGENOMIC	wastewater metagenome	ILLUMINA	2019-10-02T00:00:00Z	SAMEA5982144	ERP117567	sra	gs,ncbi,s3	gs.US,ncbi.public,s3.us-east-1	210368515	Denmark	Europe	2016-01-11						55.695	12.6147	2019-09-30	2019-09-30	2019-09-28	2019-09-28	SAMEA5982144	DTU-GE	Centre for Genomic Epidemiology\, National Food Institute\, Technical University of Denmark (DTU)\, Denmark	2019-09-30T17:04:26Z	2019-09-28T07:10:37Z	public	DTU2016-1774-PRJ1066-Metagenome-RL-44_S16_L001	DTU2016-1774-PRJ1066-Metagenome-RL-44_S16_L001	Denmark	55.695	12.6147	Centre for Genomic Epidemiology
ERR3562854	WGS	PRJEB34633	SAMEA5982127	CENTRE FOR GENOMIC EPIDEMIOLOGY, NATIONAL FOOD INS	public	ERX3561353	NextSeq 550	Illumina NextSeq	unspecified	PAIRED	RANDOM	METAGENOMIC	wastewater metagenome	ILLUMINA	2019-10-02T00:00:00Z	SAMEA5982127	ERP117567	sra	gs,ncbi,s3	gs.US,ncbi.public,s3.us-east-1	3411670576	Denmark	Europe	2016-01-11						55.6406	12.5056	2019-09-30	2019-09-30	2019-09-28	2019-09-28	SAMEA5982127	DTU-GE	Centre for Genomic Epidemiology\, National Food Institute\, Technical University of Denmark (DTU)\, Denmark	2019-09-30T17:04:26Z	2019-09-28T07:10:37Z	public	DTU2017-1294-PRJ1066-CPH-Sewage-24	DTU2017-1294-PRJ1066-CPH-Sewage-24	Denmark	55.6406	12.5056	Centre for Genomic Epidemiology
ERR3562872	WGS	PRJEB34633	SAMEA5982145	CENTRE FOR GENOMIC EPIDEMIOLOGY, NATIONAL FOOD INS	public	ERX3561371	Illumina MiSeq	Illumina MiSeq	unspecified	PAIRED	RANDOM	METAGENOMIC	wastewater metagenome	ILLUMINA	2019-10-02T00:00:00Z	SAMEA5982145	ERP117567	sra	gs,ncbi,s3	gs.US,ncbi.public,s3.us-east-1	215015981	Denmark	Europe	2016-01-17						55.695	12.6147	2019-09-30	2019-09-30	2019-09-28	2019-09-28	SAMEA5982145	DTU-GE	Centre for Genomic Epidemiology\, National Food Institute\, Technical University of Denmark (DTU)\, Denmark	2019-09-30T17:04:26Z	2019-09-28T07:10:37Z	public	DTU2016-1773-PRJ1066-Metagenome-RL-45_S15_L001	DTU2016-1773-PRJ1066-Metagenome-RL-45_S15_L001	Denmark	55.695	12.6147	Centre for Genomic Epidemiology
ERR3562840	WGS	PRJEB34633	SAMEA5982113	CENTRE FOR GENOMIC EPIDEMIOLOGY, NATIONAL FOOD INS	public	ERX3561339	Illumina MiSeq	Illumina MiSeq	unspecified	PAIRED	RANDOM	METAGENOMIC	wastewater metagenome	ILLUMINA	2019-10-02T00:00:00Z	SAMEA5982113	ERP117567	sra	gs,ncbi,s3	gs.US,ncbi.public,s3.us-east-1	196654824	Denmark	Europe	2016-01-20						55.6083	12.4503	2019-09-30	2019-09-30	2019-09-28	2019-09-28	SAMEA5982113	DTU-GE	Centre for Genomic Epidemiology\, National Food Institute\, Technical University of Denmark (DTU)\, Denmark	2019-09-30T17:04:26Z	2019-09-28T07:10:36Z	public	DTU2016-1771-PRJ1066-Metagenome-RA-5	DTU2016-1771-PRJ1066-Metagenome-RA-5	Denmark	55.6083	12.4503	Centre for Genomic Epidemiology
ERR3562855	WGS	PRJEB34633	SAMEA5982128	CENTRE FOR GENOMIC EPIDEMIOLOGY, NATIONAL FOOD INS	public	ERX3561354	Illumina MiSeq	Illumina MiSeq	unspecified	PAIRED	RANDOM	METAGENOMIC	wastewater metagenome	ILLUMINA	2019-10-02T00:00:00Z	SAMEA5982128	ERP117567	sra	gs,ncbi,s3	gs.US,ncbi.public,s3.us-east-1	218252491	Denmark	Europe	2016-01-20						55.6406	12.5056	2019-09-30	2019-09-30	2019-09-28	2019-09-28	SAMEA5982128	DTU-GE	Centre for Genomic Epidemiology\, National Food Institute\, Technical University of Denmark (DTU)\, Denmark	2019-09-30T17:04:26Z	2019-09-28T07:10:37Z	public	DTU2016-1772-PRJ1066-Metagenome-RD-25_S14_L001	DTU2016-1772-PRJ1066-Metagenome-RD-25_S14_L001	Denmark	55.6406	12.5056	Centre for Genomic Epidemiology
ERR3562841	WGS	PRJEB34633	SAMEA5982114	CENTRE FOR GENOMIC EPIDEMIOLOGY, NATIONAL FOOD INS	public	ERX3561340	Illumina MiSeq	Illumina MiSeq	unspecified	PAIRED	RANDOM	METAGENOMIC	wastewater metagenome	ILLUMINA	2019-10-02T00:00:00Z	SAMEA5982114	ERP117567	sra	gs,ncbi,s3	gs.US,ncbi.public,s3.us-east-1	204928591	Denmark	Europe	2016-01-22						55.6083	12.4503	2019-09-30	2019-09-30	2019-09-28	2019-09-28	SAMEA5982114	DTU-GE	Centre for Genomic Epidemiology\, National Food Institute\, Technical University of Denmark (DTU)\, Denmark	2019-09-30T17:04:26Z	2019-09-28T07:10:36Z	public	DTU2016-1769-PRJ1066-Metagenome-RA-6_S11_L001	DTU2016-1769-PRJ1066-Metagenome-RA-6_S11_L001	Denmark	55.6083	12.4503	Centre for Genomic Epidemiology
ERR3562856	WGS	PRJEB34633	SAMEA5982129	CENTRE FOR GENOMIC EPIDEMIOLOGY, NATIONAL FOOD INS	public	ERX3561355	Illumina MiSeq	Illumina MiSeq	unspecified	PAIRED	RANDOM	METAGENOMIC	wastewater metagenome	ILLUMINA	2019-10-02T00:00:00Z	SAMEA5982129	ERP117567	sra	gs,ncbi,s3	gs.US,ncbi.public,s3.us-east-1	317647556	Denmark	Europe	2016-01-22						55.6406	12.5056	2019-09-30	2019-09-30	2019-09-28	2019-09-28	SAMEA5982129	DTU-GE	Centre for Genomic Epidemiology\, National Food Institute\, Technical University of Denmark (DTU)\, Denmark	2019-09-30T17:04:26Z	2019-09-28T07:10:37Z	public	DTU2016-1770-PRJ1066-Metagenome-RD-26_S12_L001	DTU2016-1770-PRJ1066-Metagenome-RD-26_S12_L001	Denmark	55.6406	12.5056	Centre for Genomic Epidemiology
ERR3562857	WGS	PRJEB34633	SAMEA5982130	CENTRE FOR GENOMIC EPIDEMIOLOGY, NATIONAL FOOD INS	public	ERX3561356	Illumina MiSeq	Illumina MiSeq	unspecified	PAIRED	RANDOM	METAGENOMIC	wastewater metagenome	ILLUMINA	2019-10-02T00:00:00Z	SAMEA5982130	ERP117567	sra	gs,ncbi,s3	gs.US,ncbi.public,s3.us-east-1	284199613	Denmark	Europe	2016-01-28						55.6406	12.5056	2019-09-30	2019-09-30	2019-09-28	2019-09-28	SAMEA5982130	DTU-GE	Centre for Genomic Epidemiology\, National Food Institute\, Technical University of Denmark (DTU)\, Denmark	2019-09-30T17:04:26Z	2019-09-28T07:10:37Z	public	DTU2016-1768-PRJ1066-Metagenome-RD-27_S10_L001	DTU2016-1768-PRJ1066-Metagenome-RD-27_S10_L001	Denmark	55.6406	12.5056	Centre for Genomic Epidemiology
ERR3562873	WGS	PRJEB34633	SAMEA5982146	CENTRE FOR GENOMIC EPIDEMIOLOGY, NATIONAL FOOD INS	public	ERX3561372	Illumina MiSeq	Illumina MiSeq	unspecified	PAIRED	RANDOM	METAGENOMIC	wastewater metagenome	ILLUMINA	2019-10-02T00:00:00Z	SAMEA5982146	ERP117567	sra	gs,ncbi,s3	gs.US,ncbi.public,s3.us-east-1	211471055	Denmark	Europe	2016-01-28						55.695	12.6147	2019-09-30	2019-09-30	2019-09-28	2019-09-28	SAMEA5982146	DTU-GE	Centre for Genomic Epidemiology\, National Food Institute\, Technical University of Denmark (DTU)\, Denmark	2019-09-30T17:04:26Z	2019-09-28T07:10:37Z	public	DTU2016-1767-PRJ1066-Metagenome-RL-46_S9_L001	DTU2016-1767-PRJ1066-Metagenome-RL-46_S9_L001	Denmark	55.695	12.6147	Centre for Genomic Epidemiology
ERR1713349	WGS	PRJEB13831	SAMEA4527617	DTU	public	ERX1783583	Illumina HiSeq 3000	Illumina HiSeq	DNK.71_RA	PAIRED	RANDOM	METAGENOMIC	wastewater metagenome	ILLUMINA	2019-02-08T00:00:00Z	SAMEA4527617	ERP015409	fastq,sra	ena,gs,ncbi,s3	ena,gs.US,ncbi.public,s3.us-east-1	7249749874	Denmark	Europe	2016-02-03						55.6761	12.5683	2019-01-31	2019-01-31	2018-11-16	2016-10-31	SAMEA4527617	DTU	Technical University of Denmark	2019-01-31T17:02:41Z	2016-10-31T11:12:17Z	public	DNK.71_RA	DNK.71_RA	Denmark	55.6761? N	12.5683? E	Centre for Genomic Epidemiology	metagenome	wastewater treatment plant
ERR1713350	WGS	PRJEB13831	SAMEA4527618	DTU	public	ERX1783584	Illumina HiSeq 3000	Illumina HiSeq	DNK.71_RD	PAIRED	RANDOM	METAGENOMIC	wastewater metagenome	ILLUMINA	2019-02-08T00:00:00Z	SAMEA4527618	ERP015409	fastq,sra	ena,gs,ncbi,s3	ena,gs.US,ncbi.public,s3.us-east-1	7806456096	Denmark	Europe	2016-02-03	302	17997565878				55.6761	12.5683	2019-01-31	2019-01-31	2018-11-16	2016-10-31	SAMEA4527618	DTU	Technical University of Denmark	2019-01-31T17:02:41Z	2016-10-31T11:12:17Z	public	DNK.71_RD	DNK.71_RD	Denmark	55.6761? N	12.5683? E	Centre for Genomic Epidemiology	metagenome	wastewater treatment plant
ERR1713351	WGS	PRJEB13831	SAMEA4527619	DTU	public	ERX1783585	Illumina HiSeq 3000	Illumina HiSeq	DNK.71_RL	PAIRED	RANDOM	METAGENOMIC	wastewater metagenome	ILLUMINA	2019-02-08T00:00:00Z	SAMEA4527619	ERP015409	fastq,sra	ena,gs,ncbi,s3	ena,gs.US,ncbi.public,s3.us-east-1	3522622364	Denmark	Europe	2016-02-03	302	8350209098				55.6761	12.5683	2019-01-31	2019-01-31	2018-11-16	2016-10-31	SAMEA4527619	DTU	Technical University of Denmark	2019-01-31T17:02:41Z	2016-10-31T11:12:17Z	public	DNK.71_RL	DNK.71_RL	Denmark	55.6761? N	12.5683? E	Centre for Genomic Epidemiology	metagenome	wastewater treatment plant
ERR2200444	WGS	PRJEB23496	SAMEA4527617	ERASMUS MC, UNIVERISTY MEDICAL CENTER	public	ERX2255432	Ion Torrent S5 XL	Ion Torrent S5 XL	Ion Xpress‚Ñ¢ Plus Fragment Library Kit	SINGLE	RANDOM	METAGENOMIC	wastewater metagenome	ION_TORRENT	2020-05-30T00:00:00Z	SAMEA4527617	ERP105254	sra	gs,ncbi,s3	gs.US,ncbi.public,s3.us-east-1	853106286	Denmark	Europe	2016-02-03						55.6761	12.5683	2020-05-29	2019-01-31	2018-11-16	2016-10-31	SAMEA4527617	DTU	Technical University of Denmark	2019-01-31T17:02:41Z	2016-10-31T11:12:17Z	public	DNK.71_RA	DNK.71_RA	Denmark	55.6761? N	12.5683? E	Centre for Genomic Epidemiology	metagenome	wastewater treatment plant
ERR2298126	WGS	PRJEB23496	SAMEA4527618	ERASMUS MC, UNIVERISTY MEDICAL CENTER	public	ERX2349652	Ion Torrent S5 XL	Ion Torrent S5 XL	Ion Xpress‚Ñ¢ Plus Fragment Library Kit	SINGLE	RANDOM	METAGENOMIC	wastewater metagenome	ION_TORRENT	2020-05-30T00:00:00Z	SAMEA4527618	ERP105254	sra	gs,ncbi,s3	gs.US,ncbi.public,s3.us-east-1	1028717906	Denmark	Europe	2016-02-03	291	1299291292				55.6761	12.5683	2020-05-29	2019-01-31	2018-11-16	2016-10-31	SAMEA4527618	DTU	Technical University of Denmark	2019-01-31T17:02:41Z	2016-10-31T11:12:17Z	public	DNK.71_RD	DNK.71_RD	Denmark	55.6761? N	12.5683? E	Centre for Genomic Epidemiology	metagenome	wastewater treatment plant
ERR2356165	WGS	PRJEB23496	SAMEA4527619	ERASMUS MC, UNIVERISTY MEDICAL CENTER	public	ERX2404809	Ion Torrent S5 XL	Ion Torrent S5 XL	Ion XpressÔøΩ Plus Fragment Library Kit	SINGLE	RANDOM	METAGENOMIC	wastewater metagenome	ION_TORRENT	2020-05-30T00:00:00Z	SAMEA4527619	ERP105254	sra	gs,ncbi,s3	gs.US,ncbi.public,s3.us-east-1	837422205	Denmark	Europe	2016-02-03	302	1050135278				55.6761	12.5683	2020-05-29	2019-01-31	2018-11-16	2016-10-31	SAMEA4527619	DTU	Technical University of Denmark	2019-01-31T17:02:41Z	2016-10-31T11:12:17Z	public	DNK.71_RL	DNK.71_RL	Denmark	55.6761? N	12.5683? E	Centre for Genomic Epidemiology	metagenome	wastewater treatment plant
ERR2607436	WGS	PRJEB27054	SAMEA4700757	CENTRE FOR GENOMIC EPIDEMIOLOGY, NATIONAL FOOD INS	public	ERX2624092	Illumina HiSeq 3000		unspecified	PAIRED	RANDOM	METAGENOMIC	wastewater metagenome	ILLUMINA	2018-07-03T00:00:00Z	SAMEA4700757	ERP109094	sra,fastq	ena,ncbi,gs,s3	ena,s3.us-east-1,gs.US,ncbi.public	7203312129	Denmark	Europe	2016-02-03	302	15950192816		Denmark		55.6085	12.4505	2018-06-14	2018-06-14	2018-11-16	2018-05-31	SAMEA4700757	DTU-GE	Centre for Genomic Epidemiology\, National Food Institute\, Technical University of Denmark (DTU)\, Denmark	2018-06-14T17:03:25Z	2018-05-31T13:35:06Z	public	DNK-71_RA	DNK-71_RA		55.6085	12.4505	Centre for Genomic Epidemiology
ERR2607437	WGS	PRJEB27054	SAMEA4700758	CENTRE FOR GENOMIC EPIDEMIOLOGY, NATIONAL FOOD INS	public	ERX2624093	Illumina HiSeq 3000		unspecified	PAIRED	RANDOM	METAGENOMIC	wastewater metagenome	ILLUMINA	2018-07-03T00:00:00Z	SAMEA4700758	ERP109094	sra,fastq	gs,ncbi,s3,ena	ena,ncbi.public,gs.US,s3.us-east-1	7813973942	Denmark	Europe	2016-02-03	302	18015113588		Denmark		55.6405	12.5058	2018-06-14	2018-06-14	2018-11-16	2018-05-31	SAMEA4700758	DTU-GE	Centre for Genomic Epidemiology\, National Food Institute\, Technical University of Denmark (DTU)\, Denmark	2018-06-14T17:03:25Z	2018-05-31T13:35:06Z	public	DNK-71_RD	DNK-71_RD		55.6405	12.5058	Centre for Genomic Epidemiology
ERR2607438	WGS	PRJEB27054	SAMEA4700759	CENTRE FOR GENOMIC EPIDEMIOLOGY, NATIONAL FOOD INS	public	ERX2624094	Illumina HiSeq 3000		unspecified	PAIRED	RANDOM	METAGENOMIC	wastewater metagenome	ILLUMINA	2018-07-03T00:00:00Z	SAMEA4700759	ERP109094	sra,fastq	s3,gs,ncbi,ena	ena,gs.US,ncbi.public,s3.us-east-1	3526843826	Denmark	Europe	2016-02-03	302	8360355694		Denmark		55.695	12.615	2018-06-14	2018-06-14	2018-11-16	2018-05-31	SAMEA4700759	DTU-GE	Centre for Genomic Epidemiology\, National Food Institute\, Technical University of Denmark (DTU)\, Denmark	2018-06-14T17:03:25Z	2018-05-31T13:35:06Z	public	DNK-71_RL	DNK-71_RL		55.695	12.615	Centre for Genomic Epidemiology
ERR3562858	WGS	PRJEB34633	SAMEA5982131	CENTRE FOR GENOMIC EPIDEMIOLOGY, NATIONAL FOOD INS	public	ERX3561357	Illumina MiSeq	Illumina MiSeq	unspecified	PAIRED	RANDOM	METAGENOMIC	wastewater metagenome	ILLUMINA	2019-10-02T00:00:00Z	SAMEA5982131	ERP117567	sra	gs,ncbi,s3	gs.US,ncbi.public,s3.us-east-1	170844621	Denmark	Europe	2016-02-08						55.6406	12.5056	2019-09-30	2019-09-30	2019-09-28	2019-09-28	SAMEA5982131	DTU-GE	Centre for Genomic Epidemiology\, National Food Institute\, Technical University of Denmark (DTU)\, Denmark	2019-09-30T17:04:26Z	2019-09-28T07:10:37Z	public	DTU2016-1765-PRJ1066-Metagenome-RD-29_S7_L001	DTU2016-1765-PRJ1066-Metagenome-RD-29_S7_L001	Denmark	55.6406	12.5056	Centre for Genomic Epidemiology
ERR3562874	WGS	PRJEB34633	SAMEA5982147	CENTRE FOR GENOMIC EPIDEMIOLOGY, NATIONAL FOOD INS	public	ERX3561373	Illumina MiSeq	Illumina MiSeq	unspecified	PAIRED	RANDOM	METAGENOMIC	wastewater metagenome	ILLUMINA	2019-10-02T00:00:00Z	SAMEA5982147	ERP117567	sra	gs,ncbi,s3	gs.US,ncbi.public,s3.us-east-1	264962150	Denmark	Europe	2016-02-08						55.695	12.6147	2019-09-30	2019-09-30	2019-09-28	2019-09-28	SAMEA5982147	DTU-GE	Centre for Genomic Epidemiology\, National Food Institute\, Technical University of Denmark (DTU)\, Denmark	2019-09-30T17:04:26Z	2019-09-28T07:10:37Z	public	DTU2016-1766-PRJ1066-Metagenome-RL-48_S8_L001	DTU2016-1766-PRJ1066-Metagenome-RL-48_S8_L001	Denmark	55.695	12.6147	Centre for Genomic Epidemiology
ERR3562859	WGS	PRJEB34633	SAMEA5982132	CENTRE FOR GENOMIC EPIDEMIOLOGY, NATIONAL FOOD INS	public	ERX3561358	Illumina MiSeq	Illumina MiSeq	unspecified	PAIRED	RANDOM	METAGENOMIC	wastewater metagenome	ILLUMINA	2019-10-02T00:00:00Z	SAMEA5982132	ERP117567	sra	gs,ncbi,s3	gs.US,ncbi.public,s3.us-east-1	261220553	Denmark	Europe	2016-02-12						55.6406	12.5056	2019-09-30	2019-09-30	2019-09-28	2019-09-28	SAMEA5982132	DTU-GE	Centre for Genomic Epidemiology\, National Food Institute\, Technical University of Denmark (DTU)\, Denmark	2019-09-30T17:04:26Z	2019-09-28T07:10:37Z	public	DTU2016-1764-PRJ1066-Metagenome-RD-30_S6_L001	DTU2016-1764-PRJ1066-Metagenome-RD-30_S6_L001	Denmark	55.6406	12.5056	Centre for Genomic Epidemiology
ERR3562875	WGS	PRJEB34633	SAMEA5982148	CENTRE FOR GENOMIC EPIDEMIOLOGY, NATIONAL FOOD INS	public	ERX3561374	Illumina MiSeq	Illumina MiSeq	unspecified	PAIRED	RANDOM	METAGENOMIC	wastewater metagenome	ILLUMINA	2019-10-02T00:00:00Z	SAMEA5982148	ERP117567	sra	gs,ncbi,s3	gs.US,ncbi.public,s3.us-east-1	304988695	Denmark	Europe	2016-02-12						55.695	12.6147	2019-09-30	2019-09-30	2019-09-28	2019-09-28	SAMEA5982148	DTU-GE	Centre for Genomic Epidemiology\, National Food Institute\, Technical University of Denmark (DTU)\, Denmark	2019-09-30T17:04:26Z	2019-09-28T07:10:37Z	public	DTU2016-1617-PRJ1066-RL-Sewage-49_S16_L001	DTU2016-1617-PRJ1066-RL-Sewage-49_S16_L001	Denmark	55.695	12.6147	Centre for Genomic Epidemiology
ERR3562842	WGS	PRJEB34633	SAMEA5982115	CENTRE FOR GENOMIC EPIDEMIOLOGY, NATIONAL FOOD INS	public	ERX3561341	Illumina MiSeq	Illumina MiSeq	unspecified	PAIRED	RANDOM	METAGENOMIC	wastewater metagenome	ILLUMINA	2019-10-02T00:00:00Z	SAMEA5982115	ERP117567	sra	gs,ncbi,s3	gs.US,ncbi.public,s3.us-east-1	533375952	Denmark	Europe	2016-02-18						55.6083	12.4503	2019-09-30	2019-09-30	2019-09-28	2019-09-28	SAMEA5982115	DTU-GE	Centre for Genomic Epidemiology\, National Food Institute\, Technical University of Denmark (DTU)\, Denmark	2019-09-30T17:04:26Z	2019-09-28T07:10:37Z	public	DTU2016-1616-PRJ1066-RA-Sewage-8_S15_L001	DTU2016-1616-PRJ1066-RA-Sewage-8_S15_L001	Denmark	55.6083	12.4503	Centre for Genomic Epidemiology
ERR3562860	WGS	PRJEB34633	SAMEA5982133	CENTRE FOR GENOMIC EPIDEMIOLOGY, NATIONAL FOOD INS	public	ERX3561359	Illumina MiSeq	Illumina MiSeq	unspecified	PAIRED	RANDOM	METAGENOMIC	wastewater metagenome	ILLUMINA	2019-10-02T00:00:00Z	SAMEA5982133	ERP117567	sra	gs,ncbi,s3	gs.US,ncbi.public,s3.us-east-1	566901179	Denmark	Europe	2016-02-18						55.6406	12.5056	2019-09-30	2019-09-30	2019-09-28	2019-09-28	SAMEA5982133	DTU-GE	Centre for Genomic Epidemiology\, National Food Institute\, Technical University of Denmark (DTU)\, Denmark	2019-09-30T17:04:26Z	2019-09-28T07:10:37Z	public	DTU2016-1614-PRJ1066-RD-Sewage-31_S13_L001	DTU2016-1614-PRJ1066-RD-Sewage-31_S13_L001	Denmark	55.6406	12.5056	Centre for Genomic Epidemiology
ERR3562876	WGS	PRJEB34633	SAMEA5982149	CENTRE FOR GENOMIC EPIDEMIOLOGY, NATIONAL FOOD INS	public	ERX3561375	Illumina MiSeq	Illumina MiSeq	unspecified	PAIRED	RANDOM	METAGENOMIC	wastewater metagenome	ILLUMINA	2019-10-02T00:00:00Z	SAMEA5982149	ERP117567	sra	gs,ncbi,s3	gs.US,ncbi.public,s3.us-east-1	339771953	Denmark	Europe	2016-02-18						55.695	12.6147	2019-09-30	2019-09-30	2019-09-28	2019-09-28	SAMEA5982149	DTU-GE	Centre for Genomic Epidemiology\, National Food Institute\, Technical University of Denmark (DTU)\, Denmark	2019-09-30T17:04:26Z	2019-09-28T07:10:37Z	public	DTU2016-1615-PRJ1066-RL-Sewage-50_S14_L001	DTU2016-1615-PRJ1066-RL-Sewage-50_S14_L001	Denmark	55.695	12.6147	Centre for Genomic Epidemiology
ERR3562877	WGS	PRJEB34633	SAMEA5982150	CENTRE FOR GENOMIC EPIDEMIOLOGY, NATIONAL FOOD INS	public	ERX3561376	Illumina MiSeq	Illumina MiSeq	unspecified	PAIRED	RANDOM	METAGENOMIC	wastewater metagenome	ILLUMINA	2019-10-02T00:00:00Z	SAMEA5982150	ERP117567	sra	gs,ncbi,s3	gs.US,ncbi.public,s3.us-east-1	22443145	Denmark	Europe	2016-05-16						55.695	12.6147	2019-09-30	2019-09-30	2019-09-28	2019-09-28	SAMEA5982150	DTU-GE	Centre for Genomic Epidemiology\, National Food Institute\, Technical University of Denmark (DTU)\, Denmark	2019-09-30T17:04:26Z	2019-09-28T07:10:37Z	public	DTU2016-1172-PRJ1066-RL-Sewage-85_S14_L001	DTU2016-1172-PRJ1066-RL-Sewage-85_S14_L001	Denmark	55.695	12.6147	Centre for Genomic Epidemiology
ERR3562878	WGS	PRJEB34633	SAMEA5982151	CENTRE FOR GENOMIC EPIDEMIOLOGY, NATIONAL FOOD INS	public	ERX3561377	Illumina MiSeq	Illumina MiSeq	unspecified	PAIRED	RANDOM	METAGENOMIC	wastewater metagenome	ILLUMINA	2019-10-02T00:00:00Z	SAMEA5982151	ERP117567	sra	gs,ncbi,s3	gs.US,ncbi.public,s3.us-east-1	11356089	Denmark	Europe	2016-05-20						55.695	12.6147	2019-09-30	2019-09-30	2019-09-28	2019-09-28	SAMEA5982151	DTU-GE	Centre for Genomic Epidemiology\, National Food Institute\, Technical University of Denmark (DTU)\, Denmark	2019-09-30T17:04:26Z	2019-09-28T07:10:38Z	public	DTU2016-1497-PRJ1066-RL-Sewage-88_S10_L001	DTU2016-1497-PRJ1066-RL-Sewage-88_S10_L001	Denmark	55.695	12.6147	Centre for Genomic Epidemiology
ERR3562879	WGS	PRJEB34633	SAMEA5982152	CENTRE FOR GENOMIC EPIDEMIOLOGY, NATIONAL FOOD INS	public	ERX3561378	Illumina MiSeq	Illumina MiSeq	unspecified	PAIRED	RANDOM	METAGENOMIC	wastewater metagenome	ILLUMINA	2019-10-02T00:00:00Z	SAMEA5982152	ERP117567	sra	gs,ncbi,s3	gs.US,ncbi.public,s3.us-east-1	13371856	Denmark	Europe	2016-05-20						55.6406	12.5056	2019-09-30	2019-09-30	2019-09-28	2019-09-28	SAMEA5982152	DTU-GE	Centre for Genomic Epidemiology\, National Food Institute\, Technical University of Denmark (DTU)\, Denmark	2019-09-30T17:04:26Z	2019-09-28T07:10:38Z	public	DTU2016-1498-PRJ1066-RD-Sewage-89_S11_L001	DTU2016-1498-PRJ1066-RD-Sewage-89_S11_L001	Denmark	55.6406	12.5056	Centre for Genomic Epidemiology
ERR3562880	WGS	PRJEB34633	SAMEA5982153	CENTRE FOR GENOMIC EPIDEMIOLOGY, NATIONAL FOOD INS	public	ERX3561379	Illumina MiSeq	Illumina MiSeq	unspecified	PAIRED	RANDOM	METAGENOMIC	wastewater metagenome	ILLUMINA	2019-10-02T00:00:00Z	SAMEA5982153	ERP117567	sra	gs,ncbi,s3	gs.US,ncbi.public,s3.us-east-1	6382884	Denmark	Europe	2016-05-25						55.695	12.6147	2019-09-30	2019-09-30	2019-09-28	2019-09-28	SAMEA5982153	DTU-GE	Centre for Genomic Epidemiology\, National Food Institute\, Technical University of Denmark (DTU)\, Denmark	2019-09-30T17:04:26Z	2019-09-28T07:10:38Z	public	DTU2016-1499-PRJ1066-RL-Sewage-90_S12_L001	DTU2016-1499-PRJ1066-RL-Sewage-90_S12_L001	Denmark	55.695	12.6147	Centre for Genomic Epidemiology
ERR3562881	WGS	PRJEB34633	SAMEA5982154	CENTRE FOR GENOMIC EPIDEMIOLOGY, NATIONAL FOOD INS	public	ERX3561380	Illumina MiSeq	Illumina MiSeq	unspecified	PAIRED	RANDOM	METAGENOMIC	wastewater metagenome	ILLUMINA	2019-10-02T00:00:00Z	SAMEA5982154	ERP117567	sra	gs,ncbi,s3	gs.US,ncbi.public,s3.us-east-1	6427891	Denmark	Europe	2016-05-25						55.6406	12.5056	2019-09-30	2019-09-30	2019-09-28	2019-09-28	SAMEA5982154	DTU-GE	Centre for Genomic Epidemiology\, National Food Institute\, Technical University of Denmark (DTU)\, Denmark	2019-09-30T17:04:26Z	2019-09-28T07:10:38Z	public	DTU2016-1500-PRJ1066-RD-Sewage-91_S13_L001	DTU2016-1500-PRJ1066-RD-Sewage-91_S13_L001	Denmark	55.6406	12.5056	Centre for Genomic Epidemiology
ERR3562882	WGS	PRJEB34633	SAMEA5982155	CENTRE FOR GENOMIC EPIDEMIOLOGY, NATIONAL FOOD INS	public	ERX3561381	Illumina MiSeq	Illumina MiSeq	unspecified	PAIRED	RANDOM	METAGENOMIC	wastewater metagenome	ILLUMINA	2019-10-02T00:00:00Z	SAMEA5982155	ERP117567	sra	gs,ncbi,s3	gs.US,ncbi.public,s3.us-east-1	90721240	Denmark	Europe	2016-05-28						55.695	12.6147	2019-09-30	2019-09-30	2019-09-28	2019-09-28	SAMEA5982155	DTU-GE	Centre for Genomic Epidemiology\, National Food Institute\, Technical University of Denmark (DTU)\, Denmark	2019-09-30T17:04:26Z	2019-09-28T07:10:38Z	public	DTU2016-1501-PRJ1066-RL-Sewage-92_S14_L001	DTU2016-1501-PRJ1066-RL-Sewage-92_S14_L001	Denmark	55.695	12.6147	Centre for Genomic Epidemiology
ERR3562883	WGS	PRJEB34633	SAMEA5982156	CENTRE FOR GENOMIC EPIDEMIOLOGY, NATIONAL FOOD INS	public	ERX3561382	Illumina MiSeq	Illumina MiSeq	unspecified	PAIRED	RANDOM	METAGENOMIC	wastewater metagenome	ILLUMINA	2019-10-02T00:00:00Z	SAMEA5982156	ERP117567	sra	gs,ncbi,s3	gs.US,ncbi.public,s3.us-east-1	83532	Denmark	Europe	2016-05-28						55.6406	12.5056	2019-09-30	2019-09-30	2019-09-28	2019-09-28	SAMEA5982156	DTU-GE	Centre for Genomic Epidemiology\, National Food Institute\, Technical University of Denmark (DTU)\, Denmark	2019-09-30T17:04:26Z	2019-09-28T07:10:38Z	public	DTU2016-1502-PRJ1066-RD-Sewage-93_S15_L001	DTU2016-1502-PRJ1066-RD-Sewage-93_S15_L001	Denmark	55.6406	12.5056	Centre for Genomic Epidemiology
ERR3562884	WGS	PRJEB34633	SAMEA5982157	CENTRE FOR GENOMIC EPIDEMIOLOGY, NATIONAL FOOD INS	public	ERX3561383	Illumina MiSeq	Illumina MiSeq	unspecified	PAIRED	RANDOM	METAGENOMIC	wastewater metagenome	ILLUMINA	2019-10-02T00:00:00Z	SAMEA5982157	ERP117567	sra	gs,ncbi,s3	gs.US,ncbi.public,s3.us-east-1	39282	Denmark	Europe	2016-06-08						55.6406	12.5056	2019-09-30	2019-09-30	2019-09-28	2019-09-28	SAMEA5982157	DTU-GE	Centre for Genomic Epidemiology\, National Food Institute\, Technical University of Denmark (DTU)\, Denmark	2019-09-30T17:04:26Z	2019-09-28T07:10:38Z	public	DTU2016-1572-PRJ1066-RD-Sewage-97_S13_L001	DTU2016-1572-PRJ1066-RD-Sewage-97_S13_L001	Denmark	55.6406	12.5056	Centre for Genomic Epidemiology
ERR3562885	WGS	PRJEB34633	SAMEA5982158	CENTRE FOR GENOMIC EPIDEMIOLOGY, NATIONAL FOOD INS	public	ERX3561384	Illumina MiSeq	Illumina MiSeq	unspecified	PAIRED	RANDOM	METAGENOMIC	wastewater metagenome	ILLUMINA	2019-10-02T00:00:00Z	SAMEA5982158	ERP117567	sra	gs,ncbi,s3	gs.US,ncbi.public,s3.us-east-1	136982641	Denmark	Europe	2016-06-08						55.6406	12.5056	2019-09-30	2019-09-30	2019-09-28	2019-09-28	SAMEA5982158	DTU-GE	Centre for Genomic Epidemiology\, National Food Institute\, Technical University of Denmark (DTU)\, Denmark	2019-09-30T17:04:26Z	2019-09-28T07:10:38Z	public	DTU2016-1601-PRJ1066-RD-Sewage-97_S1_L001	DTU2016-1601-PRJ1066-RD-Sewage-97_S1_L001	Denmark	55.6406	12.5056	Centre for Genomic Epidemiology
ERR3562886	WGS	PRJEB34633	SAMEA5982159	CENTRE FOR GENOMIC EPIDEMIOLOGY, NATIONAL FOOD INS	public	ERX3561385	Illumina MiSeq	Illumina MiSeq	unspecified	PAIRED	RANDOM	METAGENOMIC	wastewater metagenome	ILLUMINA	2019-10-02T00:00:00Z	SAMEA5982159	ERP117567	sra	gs,ncbi,s3	gs.US,ncbi.public,s3.us-east-1	35261	Denmark	Europe	2016-06-08						55.695	12.6147	2019-09-30	2019-09-30	2019-09-28	2019-09-28	SAMEA5982159	DTU-GE	Centre for Genomic Epidemiology\, National Food Institute\, Technical University of Denmark (DTU)\, Denmark	2019-09-30T17:04:26Z	2019-09-28T07:10:38Z	public	DTU2016-1573-PRJ1066-RL-Sewage-98_S14_L001	DTU2016-1573-PRJ1066-RL-Sewage-98_S14_L001	Denmark	55.695	12.6147	Centre for Genomic Epidemiology
ERR3562887	WGS	PRJEB34633	SAMEA5982160	CENTRE FOR GENOMIC EPIDEMIOLOGY, NATIONAL FOOD INS	public	ERX3561386	Illumina MiSeq	Illumina MiSeq	unspecified	PAIRED	RANDOM	METAGENOMIC	wastewater metagenome	ILLUMINA	2019-10-02T00:00:00Z	SAMEA5982160	ERP117567	sra	gs,ncbi,s3	gs.US,ncbi.public,s3.us-east-1	172122	Denmark	Europe	2016-06-08						55.695	12.6147	2019-09-30	2019-09-30	2019-09-28	2019-09-28	SAMEA5982160	DTU-GE	Centre for Genomic Epidemiology\, National Food Institute\, Technical University of Denmark (DTU)\, Denmark	2019-09-30T17:04:26Z	2019-09-28T07:10:38Z	public	DTU2016-1602-PRJ1066-RL-Sewage-98_S2_L001	DTU2016-1602-PRJ1066-RL-Sewage-98_S2_L001	Denmark	55.695	12.6147	Centre for Genomic Epidemiology
ERR3562888	WGS	PRJEB34633	SAMEA5982161	CENTRE FOR GENOMIC EPIDEMIOLOGY, NATIONAL FOOD INS	public	ERX3561387	Illumina MiSeq	Illumina MiSeq	unspecified	PAIRED	RANDOM	METAGENOMIC	wastewater metagenome	ILLUMINA	2019-10-02T00:00:00Z	SAMEA5982161	ERP117567	sra	gs,ncbi,s3	gs.US,ncbi.public,s3.us-east-1	336260405	Denmark	Europe	2016-06-08						55.695	12.6147	2019-09-30	2019-09-30	2019-09-28	2019-09-28	SAMEA5982161	DTU-GE	Centre for Genomic Epidemiology\, National Food Institute\, Technical University of Denmark (DTU)\, Denmark	2019-09-30T17:04:26Z	2019-09-28T07:10:38Z	public	DTU2016-1663-PRJ1066-RL-Sewage-98_S18_L001	DTU2016-1663-PRJ1066-RL-Sewage-98_S18_L001	Denmark	55.695	12.6147	Centre for Genomic Epidemiology
ERR3562889	WGS	PRJEB34633	SAMEA5982162	CENTRE FOR GENOMIC EPIDEMIOLOGY, NATIONAL FOOD INS	public	ERX3561388	Illumina MiSeq	Illumina MiSeq	unspecified	PAIRED	RANDOM	METAGENOMIC	wastewater metagenome	ILLUMINA	2019-10-02T00:00:00Z	SAMEA5982162	ERP117567	sra	gs,ncbi,s3	gs.US,ncbi.public,s3.us-east-1	36913	Denmark	Europe	2016-06-12						55.6083	12.4503	2019-09-30	2019-09-30	2019-09-28	2019-09-28	SAMEA5982162	DTU-GE	Centre for Genomic Epidemiology\, National Food Institute\, Technical University of Denmark (DTU)\, Denmark	2019-09-30T17:04:26Z	2019-09-28T07:10:38Z	public	DTU2016-1574-PRJ1066-RA-Sewage-99_S15_L001	DTU2016-1574-PRJ1066-RA-Sewage-99_S15_L001	Denmark	55.6083	12.4503	Centre for Genomic Epidemiology
ERR3562890	WGS	PRJEB34633	SAMEA5982163	CENTRE FOR GENOMIC EPIDEMIOLOGY, NATIONAL FOOD INS	public	ERX3561389	Illumina MiSeq	Illumina MiSeq	unspecified	PAIRED	RANDOM	METAGENOMIC	wastewater metagenome	ILLUMINA	2019-10-02T00:00:00Z	SAMEA5982163	ERP117567	sra	gs,ncbi,s3	gs.US,ncbi.public,s3.us-east-1	219074	Denmark	Europe	2016-06-12						55.6083	12.4503	2019-09-30	2019-09-30	2019-09-28	2019-09-28	SAMEA5982163	DTU-GE	Centre for Genomic Epidemiology\, National Food Institute\, Technical University of Denmark (DTU)\, Denmark	2019-09-30T17:04:26Z	2019-09-28T07:10:38Z	public	DTU2016-1603-PRJ1066-RA-Sewage-99_S3_L001	DTU2016-1603-PRJ1066-RA-Sewage-99_S3_L001	Denmark	55.6083	12.4503	Centre for Genomic Epidemiology
ERR3562891	WGS	PRJEB34633	SAMEA5982164	CENTRE FOR GENOMIC EPIDEMIOLOGY, NATIONAL FOOD INS	public	ERX3561390	Illumina MiSeq	Illumina MiSeq	unspecified	PAIRED	RANDOM	METAGENOMIC	wastewater metagenome	ILLUMINA	2019-10-02T00:00:00Z	SAMEA5982164	ERP117567	sra	gs,ncbi,s3	gs.US,ncbi.public,s3.us-east-1	403199055	Denmark	Europe	2016-06-12						55.6083	12.4503	2019-09-30	2019-09-30	2019-09-28	2019-09-28	SAMEA5982164	DTU-GE	Centre for Genomic Epidemiology\, National Food Institute\, Technical University of Denmark (DTU)\, Denmark	2019-09-30T17:04:26Z	2019-09-28T07:10:38Z	public	DTU2016-1664-PRJ1066-RA-Sewage-99_S19_L001	DTU2016-1664-PRJ1066-RA-Sewage-99_S19_L001	Denmark	55.6083	12.4503	Centre for Genomic Epidemiology
ERR3562892	WGS	PRJEB34633	SAMEA5982165	CENTRE FOR GENOMIC EPIDEMIOLOGY, NATIONAL FOOD INS	public	ERX3561391	Illumina MiSeq	Illumina MiSeq	unspecified	PAIRED	RANDOM	METAGENOMIC	wastewater metagenome	ILLUMINA	2019-10-02T00:00:00Z	SAMEA5982165	ERP117567	sra	gs,ncbi,s3	gs.US,ncbi.public,s3.us-east-1	38380	Denmark	Europe	2016-06-12						55.695	12.6147	2019-09-30	2019-09-30	2019-09-28	2019-09-28	SAMEA5982165	DTU-GE	Centre for Genomic Epidemiology\, National Food Institute\, Technical University of Denmark (DTU)\, Denmark	2019-09-30T17:04:26Z	2019-09-28T07:10:38Z	public	DTU2016-1575-PRJ1066-RL-Sewage-100_S16_L001	DTU2016-1575-PRJ1066-RL-Sewage-100_S16_L001	Denmark	55.695	12.6147	Centre for Genomic Epidemiology
ERR3562893	WGS	PRJEB34633	SAMEA5982166	CENTRE FOR GENOMIC EPIDEMIOLOGY, NATIONAL FOOD INS	public	ERX3561392	Illumina MiSeq	Illumina MiSeq	unspecified	PAIRED	RANDOM	METAGENOMIC	wastewater metagenome	ILLUMINA	2019-10-02T00:00:00Z	SAMEA5982166	ERP117567	sra	gs,ncbi,s3	gs.US,ncbi.public,s3.us-east-1	144535768	Denmark	Europe	2016-06-12						55.695	12.6147	2019-09-30	2019-09-30	2019-09-28	2019-09-28	SAMEA5982166	DTU-GE	Centre for Genomic Epidemiology\, National Food Institute\, Technical University of Denmark (DTU)\, Denmark	2019-09-30T17:04:26Z	2019-09-28T07:10:38Z	public	DTU2016-1604-PRJ1066-RL-Sewage-100_S4_L001	DTU2016-1604-PRJ1066-RL-Sewage-100_S4_L001	Denmark	55.695	12.6147	Centre for Genomic Epidemiology
ERR3562894	WGS	PRJEB34633	SAMEA5982167	CENTRE FOR GENOMIC EPIDEMIOLOGY, NATIONAL FOOD INS	public	ERX3561393	Illumina MiSeq	Illumina MiSeq	unspecified	PAIRED	RANDOM	METAGENOMIC	wastewater metagenome	ILLUMINA	2019-10-02T00:00:00Z	SAMEA5982167	ERP117567	sra	gs,ncbi,s3	gs.US,ncbi.public,s3.us-east-1	37973	Denmark	Europe	2016-06-12						55.6406	12.5056	2019-09-30	2019-09-30	2019-09-28	2019-09-28	SAMEA5982167	DTU-GE	Centre for Genomic Epidemiology\, National Food Institute\, Technical University of Denmark (DTU)\, Denmark	2019-09-30T17:04:26Z	2019-09-28T07:10:38Z	public	DTU2016-1576-PRJ1066-RD-Sewage-101_S17_L001	DTU2016-1576-PRJ1066-RD-Sewage-101_S17_L001	Denmark	55.6406	12.5056	Centre for Genomic Epidemiology
ERR3562895	WGS	PRJEB34633	SAMEA5982168	CENTRE FOR GENOMIC EPIDEMIOLOGY, NATIONAL FOOD INS	public	ERX3561394	Illumina MiSeq	Illumina MiSeq	unspecified	PAIRED	RANDOM	METAGENOMIC	wastewater metagenome	ILLUMINA	2019-10-02T00:00:00Z	SAMEA5982168	ERP117567	sra	gs,ncbi,s3	gs.US,ncbi.public,s3.us-east-1	288402316	Denmark	Europe	2016-06-12						55.6406	12.5056	2019-09-30	2019-09-30	2019-09-28	2019-09-28	SAMEA5982168	DTU-GE	Centre for Genomic Epidemiology\, National Food Institute\, Technical University of Denmark (DTU)\, Denmark	2019-09-30T17:04:26Z	2019-09-28T07:10:38Z	public	DTU2016-1605-PRJ1066-RD-Sewage-101_S5_L001	DTU2016-1605-PRJ1066-RD-Sewage-101_S5_L001	Denmark	55.6406	12.5056	Centre for Genomic Epidemiology
ERR3562896	WGS	PRJEB34633	SAMEA5982169	CENTRE FOR GENOMIC EPIDEMIOLOGY, NATIONAL FOOD INS	public	ERX3561395	Illumina MiSeq	Illumina MiSeq	unspecified	PAIRED	RANDOM	METAGENOMIC	wastewater metagenome	ILLUMINA	2019-10-02T00:00:00Z	SAMEA5982169	ERP117567	sra	gs,ncbi,s3	gs.US,ncbi.public,s3.us-east-1	38692	Denmark	Europe	2016-06-14						55.695	12.6147	2019-09-30	2019-09-30	2019-09-28	2019-09-28	SAMEA5982169	DTU-GE	Centre for Genomic Epidemiology\, National Food Institute\, Technical University of Denmark (DTU)\, Denmark	2019-09-30T17:04:26Z	2019-09-28T07:10:38Z	public	DTU2016-1577-PRJ1066-RL-Sewage-102_S18_L001	DTU2016-1577-PRJ1066-RL-Sewage-102_S18_L001	Denmark	55.695	12.6147	Centre for Genomic Epidemiology
ERR3562897	WGS	PRJEB34633	SAMEA5982170	CENTRE FOR GENOMIC EPIDEMIOLOGY, NATIONAL FOOD INS	public	ERX3561396	Illumina MiSeq	Illumina MiSeq	unspecified	PAIRED	RANDOM	METAGENOMIC	wastewater metagenome	ILLUMINA	2019-10-02T00:00:00Z	SAMEA5982170	ERP117567	sra	gs,ncbi,s3	gs.US,ncbi.public,s3.us-east-1	144056320	Denmark	Europe	2016-06-14						55.695	12.6147	2019-09-30	2019-09-30	2019-09-28	2019-09-28	SAMEA5982170	DTU-GE	Centre for Genomic Epidemiology\, National Food Institute\, Technical University of Denmark (DTU)\, Denmark	2019-09-30T17:04:26Z	2019-09-28T07:10:38Z	public	DTU2016-1606-PRJ1066-RL-Sewage-102_S6_L001	DTU2016-1606-PRJ1066-RL-Sewage-102_S6_L001	Denmark	55.695	12.6147	Centre for Genomic Epidemiology
ERR3562898	WGS	PRJEB34633	SAMEA5982171	CENTRE FOR GENOMIC EPIDEMIOLOGY, NATIONAL FOOD INS	public	ERX3561397	Illumina MiSeq	Illumina MiSeq	unspecified	PAIRED	RANDOM	METAGENOMIC	wastewater metagenome	ILLUMINA	2019-10-02T00:00:00Z	SAMEA5982171	ERP117567	sra	gs,ncbi,s3	gs.US,ncbi.public,s3.us-east-1	275438934	Denmark	Europe	2016-06-18						55.6406	12.5056	2019-09-30	2019-09-30	2019-09-28	2019-09-28	SAMEA5982171	DTU-GE	Centre for Genomic Epidemiology\, National Food Institute\, Technical University of Denmark (DTU)\, Denmark	2019-09-30T17:04:26Z	2019-09-28T07:10:38Z	public	DTU2016-1609-PRJ1066-RD-Sewage-104_S8_L001	DTU2016-1609-PRJ1066-RD-Sewage-104_S8_L001	Denmark	55.6406	12.5056	Centre for Genomic Epidemiology
ERR3562899	WGS	PRJEB34633	SAMEA5982172	CENTRE FOR GENOMIC EPIDEMIOLOGY, NATIONAL FOOD INS	public	ERX3561398	Illumina MiSeq	Illumina MiSeq	unspecified	PAIRED	RANDOM	METAGENOMIC	wastewater metagenome	ILLUMINA	2019-10-02T00:00:00Z	SAMEA5982172	ERP117567	sra	gs,ncbi,s3	gs.US,ncbi.public,s3.us-east-1	338659653	Denmark	Europe	2016-06-18						55.6083	12.4503	2019-09-30	2019-09-30	2019-09-28	2019-09-28	SAMEA5982172	DTU-GE	Centre for Genomic Epidemiology\, National Food Institute\, Technical University of Denmark (DTU)\, Denmark	2019-09-30T17:04:26Z	2019-09-28T07:10:38Z	public	DTU2016-1610-PRJ1066-RA-Sewage-105_S9_L001	DTU2016-1610-PRJ1066-RA-Sewage-105_S9_L001	Denmark	55.6083	12.4503	Centre for Genomic Epidemiology
ERR3562900	WGS	PRJEB34633	SAMEA5982173	CENTRE FOR GENOMIC EPIDEMIOLOGY, NATIONAL FOOD INS	public	ERX3561399	Illumina MiSeq	Illumina MiSeq	unspecified	PAIRED	RANDOM	METAGENOMIC	wastewater metagenome	ILLUMINA	2019-10-02T00:00:00Z	SAMEA5982173	ERP117567	sra	gs,ncbi,s3	gs.US,ncbi.public,s3.us-east-1	440924135	Denmark	Europe	2016-06-18						55.695	12.6147	2019-09-30	2019-09-30	2019-09-28	2019-09-28	SAMEA5982173	DTU-GE	Centre for Genomic Epidemiology\, National Food Institute\, Technical University of Denmark (DTU)\, Denmark	2019-09-30T17:04:26Z	2019-09-28T07:10:38Z	public	DTU2016-1611-PRJ1066-RL-Sewage-106_S10_L001	DTU2016-1611-PRJ1066-RL-Sewage-106_S10_L001	Denmark	55.695	12.6147	Centre for Genomic Epidemiology
ERR3562901	WGS	PRJEB34633	SAMEA5982174	CENTRE FOR GENOMIC EPIDEMIOLOGY, NATIONAL FOOD INS	public	ERX3561400	Illumina MiSeq	Illumina MiSeq	unspecified	PAIRED	RANDOM	METAGENOMIC	wastewater metagenome	ILLUMINA	2019-10-02T00:00:00Z	SAMEA5982174	ERP117567	sra	gs,ncbi,s3	gs.US,ncbi.public,s3.us-east-1	189471497	Denmark	Europe	2016-06-27						55.695	12.6147	2019-09-30	2019-09-30	2019-09-28	2019-09-28	SAMEA5982174	DTU-GE	Centre for Genomic Epidemiology\, National Food Institute\, Technical University of Denmark (DTU)\, Denmark	2019-09-30T17:04:26Z	2019-09-28T07:10:38Z	public	DTU2016-1612-PRJ1066-RL-Sewage-107_S11_L001	DTU2016-1612-PRJ1066-RL-Sewage-107_S11_L001	Denmark	55.695	12.6147	Centre for Genomic Epidemiology
ERR3562902	WGS	PRJEB34633	SAMEA5982175	CENTRE FOR GENOMIC EPIDEMIOLOGY, NATIONAL FOOD INS	public	ERX3561401	Illumina MiSeq	Illumina MiSeq	unspecified	PAIRED	RANDOM	METAGENOMIC	wastewater metagenome	ILLUMINA	2019-10-02T00:00:00Z	SAMEA5982175	ERP117567	sra	gs,ncbi,s3	gs.US,ncbi.public,s3.us-east-1	263672346	Denmark	Europe	2016-06-27						55.6406	12.5056	2019-09-30	2019-09-30	2019-09-28	2019-09-28	SAMEA5982175	DTU-GE	Centre for Genomic Epidemiology\, National Food Institute\, Technical University of Denmark (DTU)\, Denmark	2019-09-30T17:04:26Z	2019-09-28T07:10:38Z	public	DTU2016-1613-PRJ1066-RD-Sewage-108_S12_L001	DTU2016-1613-PRJ1066-RD-Sewage-108_S12_L001	Denmark	55.6406	12.5056	Centre for Genomic Epidemiology
ERR3562903	WGS	PRJEB34633	SAMEA5982176	CENTRE FOR GENOMIC EPIDEMIOLOGY, NATIONAL FOOD INS	public	ERX3561402	Illumina MiSeq	Illumina MiSeq	unspecified	PAIRED	RANDOM	METAGENOMIC	wastewater metagenome	ILLUMINA	2019-10-02T00:00:00Z	SAMEA5982176	ERP117567	sra	gs,ncbi,s3	gs.US,ncbi.public,s3.us-east-1	400801212	Denmark	Europe	2016-07-02						55.6406	12.5056	2019-09-30	2019-09-30	2019-09-28	2019-09-28	SAMEA5982176	DTU-GE	Centre for Genomic Epidemiology\, National Food Institute\, Technical University of Denmark (DTU)\, Denmark	2019-09-30T17:04:26Z	2019-09-28T07:10:38Z	public	DTU2016-1646-PRJ1066-RD-Sewage-109_S1_L001	DTU2016-1646-PRJ1066-RD-Sewage-109_S1_L001	Denmark	55.6406	12.5056	Centre for Genomic Epidemiology
ERR3562907	WGS	PRJEB34633	SAMEA5982180	CENTRE FOR GENOMIC EPIDEMIOLOGY, NATIONAL FOOD INS	public	ERX3561406	Illumina MiSeq	Illumina MiSeq	unspecified	PAIRED	RANDOM	METAGENOMIC	wastewater metagenome	ILLUMINA	2019-10-02T00:00:00Z	SAMEA5982180	ERP117567	sra	gs,ncbi,s3	gs.US,ncbi.public,s3.us-east-1	443673052	Denmark	Europe	2016-07-02						55.695	12.6147	2019-09-30	2019-09-30	2019-09-28	2019-09-28	SAMEA5982180	DTU-GE	Centre for Genomic Epidemiology\, National Food Institute\, Technical University of Denmark (DTU)\, Denmark	2019-09-30T17:04:26Z	2019-09-28T07:10:38Z	public	DTU2016-1650-PRJ1066-RL-Sewage-113_S5_L001	DTU2016-1650-PRJ1066-RL-Sewage-113_S5_L001	Denmark	55.695	12.6147	Centre for Genomic Epidemiology
ERR3562904	WGS	PRJEB34633	SAMEA5982177	CENTRE FOR GENOMIC EPIDEMIOLOGY, NATIONAL FOOD INS	public	ERX3561403	Illumina MiSeq	Illumina MiSeq	unspecified	PAIRED	RANDOM	METAGENOMIC	wastewater metagenome	ILLUMINA	2019-10-02T00:00:00Z	SAMEA5982177	ERP117567	sra	gs,ncbi,s3	gs.US,ncbi.public,s3.us-east-1	430434590	Denmark	Europe	2016-07-04						55.695	12.6147	2019-09-30	2019-09-30	2019-09-28	2019-09-28	SAMEA5982177	DTU-GE	Centre for Genomic Epidemiology\, National Food Institute\, Technical University of Denmark (DTU)\, Denmark	2019-09-30T17:04:26Z	2019-09-28T07:10:38Z	public	DTU2016-1647-PRJ1066-RL-Sewage-110_S2_L001	DTU2016-1647-PRJ1066-RL-Sewage-110_S2_L001	Denmark	55.695	12.6147	Centre for Genomic Epidemiology
ERR3562905	WGS	PRJEB34633	SAMEA5982178	CENTRE FOR GENOMIC EPIDEMIOLOGY, NATIONAL FOOD INS	public	ERX3561404	Illumina MiSeq	Illumina MiSeq	unspecified	PAIRED	RANDOM	METAGENOMIC	wastewater metagenome	ILLUMINA	2019-10-02T00:00:00Z	SAMEA5982178	ERP117567	sra	gs,ncbi,s3	gs.US,ncbi.public,s3.us-east-1	490761707	Denmark	Europe	2016-07-04						55.6083	12.4503	2019-09-30	2019-09-30	2019-09-28	2019-09-28	SAMEA5982178	DTU-GE	Centre for Genomic Epidemiology\, National Food Institute\, Technical University of Denmark (DTU)\, Denmark	2019-09-30T17:04:26Z	2019-09-28T07:10:38Z	public	DTU2016-1648-PRJ1066-RA-Sewage-111_S3_L001	DTU2016-1648-PRJ1066-RA-Sewage-111_S3_L001	Denmark	55.6083	12.4503	Centre for Genomic Epidemiology
ERR3562906	WGS	PRJEB34633	SAMEA5982179	CENTRE FOR GENOMIC EPIDEMIOLOGY, NATIONAL FOOD INS	public	ERX3561405	Illumina MiSeq	Illumina MiSeq	unspecified	PAIRED	RANDOM	METAGENOMIC	wastewater metagenome	ILLUMINA	2019-10-02T00:00:00Z	SAMEA5982179	ERP117567	sra	gs,ncbi,s3	gs.US,ncbi.public,s3.us-east-1	445632853	Denmark	Europe	2016-07-04						55.6406	12.5056	2019-09-30	2019-09-30	2019-09-28	2019-09-28	SAMEA5982179	DTU-GE	Centre for Genomic Epidemiology\, National Food Institute\, Technical University of Denmark (DTU)\, Denmark	2019-09-30T17:04:26Z	2019-09-28T07:10:38Z	public	DTU2016-1649-PRJ1066-RD-Sewage-112_S4_L001	DTU2016-1649-PRJ1066-RD-Sewage-112_S4_L001	Denmark	55.6406	12.5056	Centre for Genomic Epidemiology
ERR3562908	WGS	PRJEB34633	SAMEA5982181	CENTRE FOR GENOMIC EPIDEMIOLOGY, NATIONAL FOOD INS	public	ERX3561407	Illumina MiSeq	Illumina MiSeq	unspecified	PAIRED	RANDOM	METAGENOMIC	wastewater metagenome	ILLUMINA	2019-10-02T00:00:00Z	SAMEA5982181	ERP117567	sra	gs,ncbi,s3	gs.US,ncbi.public,s3.us-east-1	406594543	Denmark	Europe	2016-07-13						55.6406	12.5056	2019-09-30	2019-09-30	2019-09-28	2019-09-28	SAMEA5982181	DTU-GE	Centre for Genomic Epidemiology\, National Food Institute\, Technical University of Denmark (DTU)\, Denmark	2019-09-30T17:04:26Z	2019-09-28T07:10:38Z	public	DTU2016-1651-PRJ1066-RD-Sewage-114_S6_L001	DTU2016-1651-PRJ1066-RD-Sewage-114_S6_L001	Denmark	55.6406	12.5056	Centre for Genomic Epidemiology
ERR3562909	WGS	PRJEB34633	SAMEA5982182	CENTRE FOR GENOMIC EPIDEMIOLOGY, NATIONAL FOOD INS	public	ERX3561408	Illumina MiSeq	Illumina MiSeq	unspecified	PAIRED	RANDOM	METAGENOMIC	wastewater metagenome	ILLUMINA	2019-10-02T00:00:00Z	SAMEA5982182	ERP117567	sra	gs,ncbi,s3	gs.US,ncbi.public,s3.us-east-1	385454211	Denmark	Europe	2016-07-13						55.695	12.6147	2019-09-30	2019-09-30	2019-09-28	2019-09-28	SAMEA5982182	DTU-GE	Centre for Genomic Epidemiology\, National Food Institute\, Technical University of Denmark (DTU)\, Denmark	2019-09-30T17:04:26Z	2019-09-28T07:10:38Z	public	DTU2016-1652-PRJ1066-RL-Sewage-115_S7_L001	DTU2016-1652-PRJ1066-RL-Sewage-115_S7_L001	Denmark	55.695	12.6147	Centre for Genomic Epidemiology
ERR3562910	WGS	PRJEB34633	SAMEA5982183	CENTRE FOR GENOMIC EPIDEMIOLOGY, NATIONAL FOOD INS	public	ERX3561409	Illumina MiSeq	Illumina MiSeq	unspecified	PAIRED	RANDOM	METAGENOMIC	wastewater metagenome	ILLUMINA	2019-10-02T00:00:00Z	SAMEA5982183	ERP117567	sra	gs,ncbi,s3	gs.US,ncbi.public,s3.us-east-1	350337382	Denmark	Europe	2016-07-17						55.6083	12.4503	2019-09-30	2019-09-30	2019-09-28	2019-09-28	SAMEA5982183	DTU-GE	Centre for Genomic Epidemiology\, National Food Institute\, Technical University of Denmark (DTU)\, Denmark	2019-09-30T17:04:26Z	2019-09-28T07:10:38Z	public	DTU2016-1653-PRJ1066-RA-Sewage-116_S8_L001	DTU2016-1653-PRJ1066-RA-Sewage-116_S8_L001	Denmark	55.6083	12.4503	Centre for Genomic Epidemiology
ERR3562911	WGS	PRJEB34633	SAMEA5982184	CENTRE FOR GENOMIC EPIDEMIOLOGY, NATIONAL FOOD INS	public	ERX3561410	Illumina MiSeq	Illumina MiSeq	unspecified	PAIRED	RANDOM	METAGENOMIC	wastewater metagenome	ILLUMINA	2019-10-02T00:00:00Z	SAMEA5982184	ERP117567	sra	gs,ncbi,s3	gs.US,ncbi.public,s3.us-east-1	449009390	Denmark	Europe	2016-07-17						55.695	12.6147	2019-09-30	2019-09-30	2019-09-28	2019-09-28	SAMEA5982184	DTU-GE	Centre for Genomic Epidemiology\, National Food Institute\, Technical University of Denmark (DTU)\, Denmark	2019-09-30T17:04:26Z	2019-09-28T07:10:38Z	public	DTU2016-1654-PRJ1066-RL-Sewage-117_S9_L001	DTU2016-1654-PRJ1066-RL-Sewage-117_S9_L001	Denmark	55.695	12.6147	Centre for Genomic Epidemiology
ERR3562912	WGS	PRJEB34633	SAMEA5982185	CENTRE FOR GENOMIC EPIDEMIOLOGY, NATIONAL FOOD INS	public	ERX3561411	Illumina MiSeq	Illumina MiSeq	unspecified	PAIRED	RANDOM	METAGENOMIC	wastewater metagenome	ILLUMINA	2019-10-02T00:00:00Z	SAMEA5982185	ERP117567	sra	gs,ncbi,s3	gs.US,ncbi.public,s3.us-east-1	436734845	Denmark	Europe	2016-07-18						55.6406	12.5056	2019-09-30	2019-09-30	2019-09-28	2019-09-28	SAMEA5982185	DTU-GE	Centre for Genomic Epidemiology\, National Food Institute\, Technical University of Denmark (DTU)\, Denmark	2019-09-30T17:04:26Z	2019-09-28T07:10:38Z	public	DTU2016-1655-PRJ1066-RD-Sewage-118_S10_L001	DTU2016-1655-PRJ1066-RD-Sewage-118_S10_L001	Denmark	55.6406	12.5056	Centre for Genomic Epidemiology
ERR3562913	WGS	PRJEB34633	SAMEA5982186	CENTRE FOR GENOMIC EPIDEMIOLOGY, NATIONAL FOOD INS	public	ERX3561412	Illumina MiSeq	Illumina MiSeq	unspecified	PAIRED	RANDOM	METAGENOMIC	wastewater metagenome	ILLUMINA	2019-10-02T00:00:00Z	SAMEA5982186	ERP117567	sra	gs,ncbi,s3	gs.US,ncbi.public,s3.us-east-1	443430879	Denmark	Europe	2016-07-20						55.695	12.6147	2019-09-30	2019-09-30	2019-09-28	2019-09-28	SAMEA5982186	DTU-GE	Centre for Genomic Epidemiology\, National Food Institute\, Technical University of Denmark (DTU)\, Denmark	2019-09-30T17:04:26Z	2019-09-28T07:10:38Z	public	DTU2016-1656-PRJ1066-RL-Sewage-119_S11_L001	DTU2016-1656-PRJ1066-RL-Sewage-119_S11_L001	Denmark	55.695	12.6147	Centre for Genomic Epidemiology
ERR3562914	WGS	PRJEB34633	SAMEA5982187	CENTRE FOR GENOMIC EPIDEMIOLOGY, NATIONAL FOOD INS	public	ERX3561413	Illumina MiSeq	Illumina MiSeq	unspecified	PAIRED	RANDOM	METAGENOMIC	wastewater metagenome	ILLUMINA	2019-10-02T00:00:00Z	SAMEA5982187	ERP117567	sra	gs,ncbi,s3	gs.US,ncbi.public,s3.us-east-1	410646586	Denmark	Europe	2016-07-20						55.6406	12.5056	2019-09-30	2019-09-30	2019-09-28	2019-09-28	SAMEA5982187	DTU-GE	Centre for Genomic Epidemiology\, National Food Institute\, Technical University of Denmark (DTU)\, Denmark	2019-09-30T17:04:26Z	2019-09-28T07:10:38Z	public	DTU2016-1657-PRJ1066-RD-Sewage-120_S12_L001	DTU2016-1657-PRJ1066-RD-Sewage-120_S12_L001	Denmark	55.6406	12.5056	Centre for Genomic Epidemiology
ERR3562915	WGS	PRJEB34633	SAMEA5982188	CENTRE FOR GENOMIC EPIDEMIOLOGY, NATIONAL FOOD INS	public	ERX3561414	Illumina MiSeq	Illumina MiSeq	unspecified	PAIRED	RANDOM	METAGENOMIC	wastewater metagenome	ILLUMINA	2019-10-02T00:00:00Z	SAMEA5982188	ERP117567	sra	gs,ncbi,s3	gs.US,ncbi.public,s3.us-east-1	358110389	Denmark	Europe	2016-07-22						55.695	12.6147	2019-09-30	2019-09-30	2019-09-28	2019-09-28	SAMEA5982188	DTU-GE	Centre for Genomic Epidemiology\, National Food Institute\, Technical University of Denmark (DTU)\, Denmark	2019-09-30T17:04:26Z	2019-09-28T07:10:38Z	public	DTU2016-1658-PRJ1066-RL-Sewage-121_S13_L001	DTU2016-1658-PRJ1066-RL-Sewage-121_S13_L001	Denmark	55.695	12.6147	Centre for Genomic Epidemiology
ERR3562916	WGS	PRJEB34633	SAMEA5982189	CENTRE FOR GENOMIC EPIDEMIOLOGY, NATIONAL FOOD INS	public	ERX3561415	Illumina MiSeq	Illumina MiSeq	unspecified	PAIRED	RANDOM	METAGENOMIC	wastewater metagenome	ILLUMINA	2019-10-02T00:00:00Z	SAMEA5982189	ERP117567	sra	gs,ncbi,s3	gs.US,ncbi.public,s3.us-east-1	437515791	Denmark	Europe	2016-07-22						55.6406	12.5056	2019-09-30	2019-09-30	2019-09-28	2019-09-28	SAMEA5982189	DTU-GE	Centre for Genomic Epidemiology\, National Food Institute\, Technical University of Denmark (DTU)\, Denmark	2019-09-30T17:04:26Z	2019-09-28T07:10:38Z	public	DTU2016-1659-PRJ1066-RD-Sewage-122_S14_L001	DTU2016-1659-PRJ1066-RD-Sewage-122_S14_L001	Denmark	55.6406	12.5056	Centre for Genomic Epidemiology
ERR3562918	WGS	PRJEB34633	SAMEA5982191	CENTRE FOR GENOMIC EPIDEMIOLOGY, NATIONAL FOOD INS	public	ERX3561417	Illumina MiSeq	Illumina MiSeq	unspecified	PAIRED	RANDOM	METAGENOMIC	wastewater metagenome	ILLUMINA	2019-10-02T00:00:00Z	SAMEA5982191	ERP117567	sra	gs,ncbi,s3	gs.US,ncbi.public,s3.us-east-1	214979675	Denmark	Europe	2016-08-02						55.6083	12.4503	2019-09-30	2019-09-30	2019-09-28	2019-09-28	SAMEA5982191	DTU-GE	Centre for Genomic Epidemiology\, National Food Institute\, Technical University of Denmark (DTU)\, Denmark	2019-09-30T17:04:26Z	2019-09-28T07:10:38Z	public	DTU2016-1760-PRJ1066-124-RA-124_S2_L001	DTU2016-1760-PRJ1066-124-RA-124_S2_L001	Denmark	55.6083	12.4503	Centre for Genomic Epidemiology
ERR3562919	WGS	PRJEB34633	SAMEA5982192	CENTRE FOR GENOMIC EPIDEMIOLOGY, NATIONAL FOOD INS	public	ERX3561418	Illumina MiSeq	Illumina MiSeq	unspecified	PAIRED	RANDOM	METAGENOMIC	wastewater metagenome	ILLUMINA	2019-10-02T00:00:00Z	SAMEA5982192	ERP117567	sra	gs,ncbi,s3	gs.US,ncbi.public,s3.us-east-1	216699336	Denmark	Europe	2016-08-02						55.6406	12.5056	2019-09-30	2019-09-30	2019-09-28	2019-09-28	SAMEA5982192	DTU-GE	Centre for Genomic Epidemiology\, National Food Institute\, Technical University of Denmark (DTU)\, Denmark	2019-09-30T17:04:26Z	2019-09-28T07:10:38Z	public	DTU2016-1761-PRJ1066-125-RD-125_S3_L001	DTU2016-1761-PRJ1066-125-RD-125_S3_L001	Denmark	55.6406	12.5056	Centre for Genomic Epidemiology
ERR3562917	WGS	PRJEB34633	SAMEA5982190	CENTRE FOR GENOMIC EPIDEMIOLOGY, NATIONAL FOOD INS	public	ERX3561416	Illumina MiSeq	Illumina MiSeq	unspecified	PAIRED	RANDOM	METAGENOMIC	wastewater metagenome	ILLUMINA	2019-10-02T00:00:00Z	SAMEA5982190	ERP117567	sra	gs,ncbi,s3	gs.US,ncbi.public,s3.us-east-1	117212989	Denmark	Europe	2016-08-08						55.6083	12.4503	2019-09-30	2019-09-30	2019-09-28	2019-09-28	SAMEA5982190	DTU-GE	Centre for Genomic Epidemiology\, National Food Institute\, Technical University of Denmark (DTU)\, Denmark	2019-09-30T17:04:26Z	2019-09-28T07:10:38Z	public	DTU2016-1759-PRJ1066-123-RA-123_S1_L001	DTU2016-1759-PRJ1066-123-RA-123_S1_L001	Denmark	55.6083	12.4503	Centre for Genomic Epidemiology
ERR3562920	WGS	PRJEB34633	SAMEA5982193	CENTRE FOR GENOMIC EPIDEMIOLOGY, NATIONAL FOOD INS	public	ERX3561419	NextSeq 550	Illumina NextSeq	unspecified	PAIRED	RANDOM	METAGENOMIC	wastewater metagenome	ILLUMINA	2019-10-02T00:00:00Z	SAMEA5982193	ERP117567	sra	gs,ncbi,s3	gs.US,ncbi.public,s3.us-east-1	3457292379	Denmark	Europe	2016-08-10						55.695	12.6147	2019-09-30	2019-09-30	2019-09-28	2019-09-28	SAMEA5982193	DTU-GE	Centre for Genomic Epidemiology\, National Food Institute\, Technical University of Denmark (DTU)\, Denmark	2019-09-30T17:04:26Z	2019-09-28T07:10:38Z	public	DTU2017-1101-PRJ1066-CPH-Sewage-127	DTU2017-1101-PRJ1066-CPH-Sewage-127	Denmark	55.695	12.6147	Centre for Genomic Epidemiology
ERR3562921	WGS	PRJEB34633	SAMEA5982194	CENTRE FOR GENOMIC EPIDEMIOLOGY, NATIONAL FOOD INS	public	ERX3561420	NextSeq 550	Illumina NextSeq	unspecified	PAIRED	RANDOM	METAGENOMIC	wastewater metagenome	ILLUMINA	2019-10-02T00:00:00Z	SAMEA5982194	ERP117567	sra	gs,ncbi,s3	gs.US,ncbi.public,s3.us-east-1	3333806667	Denmark	Europe	2016-08-10						55.6406	12.5056	2019-09-30	2019-09-30	2019-09-28	2019-09-28	SAMEA5982194	DTU-GE	Centre for Genomic Epidemiology\, National Food Institute\, Technical University of Denmark (DTU)\, Denmark	2019-09-30T17:04:26Z	2019-09-28T07:10:38Z	public	DTU2017-1102-PRJ1066-CPH-Sewage-128	DTU2017-1102-PRJ1066-CPH-Sewage-128	Denmark	55.6406	12.5056	Centre for Genomic Epidemiology
ERR3562922	WGS	PRJEB34633	SAMEA5982195	CENTRE FOR GENOMIC EPIDEMIOLOGY, NATIONAL FOOD INS	public	ERX3561421	NextSeq 550	Illumina NextSeq	unspecified	PAIRED	RANDOM	METAGENOMIC	wastewater metagenome	ILLUMINA	2019-10-02T00:00:00Z	SAMEA5982195	ERP117567	sra	gs,ncbi,s3	gs.US,ncbi.public,s3.us-east-1	3596689952	Denmark	Europe	2016-08-16						55.695	12.6147	2019-09-30	2019-09-30	2019-09-28	2019-09-28	SAMEA5982195	DTU-GE	Centre for Genomic Epidemiology\, National Food Institute\, Technical University of Denmark (DTU)\, Denmark	2019-09-30T17:04:26Z	2019-09-28T07:10:38Z	public	DTU2017-1274-PRJ1066-CPH-Sewage-129	DTU2017-1274-PRJ1066-CPH-Sewage-129	Denmark	55.695	12.6147	Centre for Genomic Epidemiology
ERR3562926	WGS	PRJEB34633	SAMEA5982199	CENTRE FOR GENOMIC EPIDEMIOLOGY, NATIONAL FOOD INS	public	ERX3561425	NextSeq 550	Illumina NextSeq	unspecified	PAIRED	RANDOM	METAGENOMIC	wastewater metagenome	ILLUMINA	2019-10-02T00:00:00Z	SAMEA5982199	ERP117567	sra	gs,ncbi,s3	gs.US,ncbi.public,s3.us-east-1	430811436	Denmark	Europe	2016-08-16						55.6083	12.4503	2019-09-30	2019-09-30	2019-09-28	2019-09-28	SAMEA5982199	DTU-GE	Centre for Genomic Epidemiology\, National Food Institute\, Technical University of Denmark (DTU)\, Denmark	2019-09-30T17:04:26Z	2019-09-28T07:10:39Z	public	DTU2017-1107-PRJ1066-CPH-Sewage-133	DTU2017-1107-PRJ1066-CPH-Sewage-133	Denmark	55.6083	12.4503	Centre for Genomic Epidemiology
ERR3562927	WGS	PRJEB34633	SAMEA5982200	CENTRE FOR GENOMIC EPIDEMIOLOGY, NATIONAL FOOD INS	public	ERX3561426	NextSeq 550	Illumina NextSeq	unspecified	PAIRED	RANDOM	METAGENOMIC	wastewater metagenome	ILLUMINA	2019-10-02T00:00:00Z	SAMEA5982200	ERP117567	sra	gs,ncbi,s3	gs.US,ncbi.public,s3.us-east-1	5155333663	Denmark	Europe	2016-08-16						55.6406	12.5056	2019-09-30	2019-09-30	2019-09-28	2019-09-28	SAMEA5982200	DTU-GE	Centre for Genomic Epidemiology\, National Food Institute\, Technical University of Denmark (DTU)\, Denmark	2019-09-30T17:04:26Z	2019-09-28T07:10:39Z	public	DTU2017-1108-PRJ1066-CPH-Sewage-134	DTU2017-1108-PRJ1066-CPH-Sewage-134	Denmark	55.6406	12.5056	Centre for Genomic Epidemiology
ERR3562923	WGS	PRJEB34633	SAMEA5982196	CENTRE FOR GENOMIC EPIDEMIOLOGY, NATIONAL FOOD INS	public	ERX3561422	NextSeq 550	Illumina NextSeq	unspecified	PAIRED	RANDOM	METAGENOMIC	wastewater metagenome	ILLUMINA	2019-10-02T00:00:00Z	SAMEA5982196	ERP117567	sra	gs,ncbi,s3	gs.US,ncbi.public,s3.us-east-1	3808382483	Denmark	Europe	2016-08-18						55.695	12.6147	2019-09-30	2019-09-30	2019-09-28	2019-09-28	SAMEA5982196	DTU-GE	Centre for Genomic Epidemiology\, National Food Institute\, Technical University of Denmark (DTU)\, Denmark	2019-09-30T17:04:26Z	2019-09-28T07:10:38Z	public	DTU2017-1104-PRJ1066-CPH-Sewage-130	DTU2017-1104-PRJ1066-CPH-Sewage-130	Denmark	55.695	12.6147	Centre for Genomic Epidemiology
ERR3562924	WGS	PRJEB34633	SAMEA5982197	CENTRE FOR GENOMIC EPIDEMIOLOGY, NATIONAL FOOD INS	public	ERX3561423	NextSeq 550	Illumina NextSeq	unspecified	PAIRED	RANDOM	METAGENOMIC	wastewater metagenome	ILLUMINA	2019-10-02T00:00:00Z	SAMEA5982197	ERP117567	sra	gs,ncbi,s3	gs.US,ncbi.public,s3.us-east-1	625813186	Denmark	Europe	2016-08-18						55.6406	12.5056	2019-09-30	2019-09-30	2019-09-28	2019-09-28	SAMEA5982197	DTU-GE	Centre for Genomic Epidemiology\, National Food Institute\, Technical University of Denmark (DTU)\, Denmark	2019-09-30T17:04:26Z	2019-09-28T07:10:38Z	public	DTU2017-1105-PRJ1066-CPH-Sewage-131	DTU2017-1105-PRJ1066-CPH-Sewage-131	Denmark	55.6406	12.5056	Centre for Genomic Epidemiology
ERR3562925	WGS	PRJEB34633	SAMEA5982198	CENTRE FOR GENOMIC EPIDEMIOLOGY, NATIONAL FOOD INS	public	ERX3561424	NextSeq 550	Illumina NextSeq	unspecified	PAIRED	RANDOM	METAGENOMIC	wastewater metagenome	ILLUMINA	2019-10-02T00:00:00Z	SAMEA5982198	ERP117567	sra	gs,ncbi,s3	gs.US,ncbi.public,s3.us-east-1	532241809	Denmark	Europe	2016-08-22						55.695	12.6147	2019-09-30	2019-09-30	2019-09-28	2019-09-28	SAMEA5982198	DTU-GE	Centre for Genomic Epidemiology\, National Food Institute\, Technical University of Denmark (DTU)\, Denmark	2019-09-30T17:04:26Z	2019-09-28T07:10:39Z	public	DTU2017-1106-PRJ1066-CPH-Sewage-132	DTU2017-1106-PRJ1066-CPH-Sewage-132	Denmark	55.695	12.6147	Centre for Genomic Epidemiology
ERR3562928	WGS	PRJEB34633	SAMEA5982201	CENTRE FOR GENOMIC EPIDEMIOLOGY, NATIONAL FOOD INS	public	ERX3561427	NextSeq 550	Illumina NextSeq	unspecified	PAIRED	RANDOM	METAGENOMIC	wastewater metagenome	ILLUMINA	2019-10-02T00:00:00Z	SAMEA5982201	ERP117567	sra	gs,ncbi,s3	gs.US,ncbi.public,s3.us-east-1	3714545689	Denmark	Europe	2016-08-22						55.6406	12.5056	2019-09-30	2019-09-30	2019-09-28	2019-09-28	SAMEA5982201	DTU-GE	Centre for Genomic Epidemiology\, National Food Institute\, Technical University of Denmark (DTU)\, Denmark	2019-09-30T17:04:26Z	2019-09-28T07:10:39Z	public	DTU2017-1109-PRJ1066-CPH-Sewage-135	DTU2017-1109-PRJ1066-CPH-Sewage-135	Denmark	55.6406	12.5056	Centre for Genomic Epidemiology
ERR3562929	WGS	PRJEB34633	SAMEA5982202	CENTRE FOR GENOMIC EPIDEMIOLOGY, NATIONAL FOOD INS	public	ERX3561428	NextSeq 550	Illumina NextSeq	unspecified	PAIRED	RANDOM	METAGENOMIC	wastewater metagenome	ILLUMINA	2019-10-02T00:00:00Z	SAMEA5982202	ERP117567	sra	gs,ncbi,s3	gs.US,ncbi.public,s3.us-east-1	4168312631	Denmark	Europe	2016-08-29						55.695	12.6147	2019-09-30	2019-09-30	2019-09-28	2019-09-28	SAMEA5982202	DTU-GE	Centre for Genomic Epidemiology\, National Food Institute\, Technical University of Denmark (DTU)\, Denmark	2019-09-30T17:04:26Z	2019-09-28T07:10:39Z	public	DTU2017-1110-PRJ1066-CPH-Sewage-136	DTU2017-1110-PRJ1066-CPH-Sewage-136	Denmark	55.695	12.6147	Centre for Genomic Epidemiology
ERR3562930	WGS	PRJEB34633	SAMEA5982203	CENTRE FOR GENOMIC EPIDEMIOLOGY, NATIONAL FOOD INS	public	ERX3561429	NextSeq 550	Illumina NextSeq	unspecified	PAIRED	RANDOM	METAGENOMIC	wastewater metagenome	ILLUMINA	2019-10-02T00:00:00Z	SAMEA5982203	ERP117567	sra	gs,ncbi,s3	gs.US,ncbi.public,s3.us-east-1	2060604840	Denmark	Europe	2016-08-29						55.695	12.6147	2019-09-30	2019-09-30	2019-09-28	2019-09-28	SAMEA5982203	DTU-GE	Centre for Genomic Epidemiology\, National Food Institute\, Technical University of Denmark (DTU)\, Denmark	2019-09-30T17:04:26Z	2019-09-28T07:10:39Z	public	DTU2017-1276-PRJ1066-CPH-Sewage-136	DTU2017-1276-PRJ1066-CPH-Sewage-136	Denmark	55.695	12.6147	Centre for Genomic Epidemiology
ERR3562931	WGS	PRJEB34633	SAMEA5982204	CENTRE FOR GENOMIC EPIDEMIOLOGY, NATIONAL FOOD INS	public	ERX3561430	NextSeq 550	Illumina NextSeq	unspecified	PAIRED	RANDOM	METAGENOMIC	wastewater metagenome	ILLUMINA	2019-10-02T00:00:00Z	SAMEA5982204	ERP117567	sra	gs,ncbi,s3	gs.US,ncbi.public,s3.us-east-1	3458989670	Denmark	Europe	2016-08-29						55.6406	12.5056	2019-09-30	2019-09-30	2019-09-28	2019-09-28	SAMEA5982204	DTU-GE	Centre for Genomic Epidemiology\, National Food Institute\, Technical University of Denmark (DTU)\, Denmark	2019-09-30T17:04:26Z	2019-09-28T07:10:39Z	public	DTU2017-1277-PRJ1066-CPH-Sewage-137	DTU2017-1277-PRJ1066-CPH-Sewage-137	Denmark	55.6406	12.5056	Centre for Genomic Epidemiology
ERR3562932	WGS	PRJEB34633	SAMEA5982205	CENTRE FOR GENOMIC EPIDEMIOLOGY, NATIONAL FOOD INS	public	ERX3561431	NextSeq 550	Illumina NextSeq	unspecified	PAIRED	RANDOM	METAGENOMIC	wastewater metagenome	ILLUMINA	2019-10-02T00:00:00Z	SAMEA5982205	ERP117567	sra	gs,ncbi,s3	gs.US,ncbi.public,s3.us-east-1	403766670	Denmark	Europe	2016-09-07						55.6406	12.5056	2019-09-30	2019-09-30	2019-09-28	2019-09-28	SAMEA5982205	DTU-GE	Centre for Genomic Epidemiology\, National Food Institute\, Technical University of Denmark (DTU)\, Denmark	2019-09-30T17:04:26Z	2019-09-28T07:10:39Z	public	DTU2017-1112-PRJ1066-CPH-Sewage-138	DTU2017-1112-PRJ1066-CPH-Sewage-138	Denmark	55.6406	12.5056	Centre for Genomic Epidemiology
ERR3562933	WGS	PRJEB34633	SAMEA5982206	CENTRE FOR GENOMIC EPIDEMIOLOGY, NATIONAL FOOD INS	public	ERX3561432	NextSeq 550	Illumina NextSeq	unspecified	PAIRED	RANDOM	METAGENOMIC	wastewater metagenome	ILLUMINA	2019-10-02T00:00:00Z	SAMEA5982206	ERP117567	sra	gs,ncbi,s3	gs.US,ncbi.public,s3.us-east-1	505464709	Denmark	Europe	2016-09-07						55.695	12.6147	2019-09-30	2019-09-30	2019-09-28	2019-09-28	SAMEA5982206	DTU-GE	Centre for Genomic Epidemiology\, National Food Institute\, Technical University of Denmark (DTU)\, Denmark	2019-09-30T17:04:26Z	2019-09-28T07:10:39Z	public	DTU2017-1113-PRJ1066-CPH-Sewage-139	DTU2017-1113-PRJ1066-CPH-Sewage-139	Denmark	55.695	12.6147	Centre for Genomic Epidemiology
ERR3562934	WGS	PRJEB34633	SAMEA5982207	CENTRE FOR GENOMIC EPIDEMIOLOGY, NATIONAL FOOD INS	public	ERX3561433	NextSeq 550	Illumina NextSeq	unspecified	PAIRED	RANDOM	METAGENOMIC	wastewater metagenome	ILLUMINA	2019-10-02T00:00:00Z	SAMEA5982207	ERP117567	sra	gs,ncbi,s3	gs.US,ncbi.public,s3.us-east-1	681819305	Denmark	Europe	2016-09-07						55.6083	12.4503	2019-09-30	2019-09-30	2019-09-28	2019-09-28	SAMEA5982207	DTU-GE	Centre for Genomic Epidemiology\, National Food Institute\, Technical University of Denmark (DTU)\, Denmark	2019-09-30T17:04:26Z	2019-09-28T07:10:39Z	public	DTU2017-1114-PRJ1066-CPH-Sewage-140	DTU2017-1114-PRJ1066-CPH-Sewage-140	Denmark	55.6083	12.4503	Centre for Genomic Epidemiology
ERR3562935	WGS	PRJEB34633	SAMEA5982208	CENTRE FOR GENOMIC EPIDEMIOLOGY, NATIONAL FOOD INS	public	ERX3561434	NextSeq 550	Illumina NextSeq	unspecified	PAIRED	RANDOM	METAGENOMIC	wastewater metagenome	ILLUMINA	2019-10-02T00:00:00Z	SAMEA5982208	ERP117567	sra	gs,ncbi,s3	gs.US,ncbi.public,s3.us-east-1	2855582996	Denmark	Europe	2016-09-07						55.6083	12.4503	2019-09-30	2019-09-30	2019-09-28	2019-09-28	SAMEA5982208	DTU-GE	Centre for Genomic Epidemiology\, National Food Institute\, Technical University of Denmark (DTU)\, Denmark	2019-09-30T17:04:26Z	2019-09-28T07:10:39Z	public	DTU2017-1281-PRJ1066-CPH-Sewage-140rerun	DTU2017-1281-PRJ1066-CPH-Sewage-140rerun	Denmark	55.6083	12.4503	Centre for Genomic Epidemiology
ERR3562936	WGS	PRJEB34633	SAMEA5982209	CENTRE FOR GENOMIC EPIDEMIOLOGY, NATIONAL FOOD INS	public	ERX3561435	NextSeq 550	Illumina NextSeq	unspecified	PAIRED	RANDOM	METAGENOMIC	wastewater metagenome	ILLUMINA	2019-10-02T00:00:00Z	SAMEA5982209	ERP117567	sra	gs,ncbi,s3	gs.US,ncbi.public,s3.us-east-1	4793249475	Denmark	Europe	2016-09-13						55.6406	12.5056	2019-09-30	2019-09-30	2019-09-28	2019-09-28	SAMEA5982209	DTU-GE	Centre for Genomic Epidemiology\, National Food Institute\, Technical University of Denmark (DTU)\, Denmark	2019-09-30T17:04:26Z	2019-09-28T07:10:39Z	public	DTU2017-1115-PRJ1066-CPH-Sewage-141	DTU2017-1115-PRJ1066-CPH-Sewage-141	Denmark	55.6406	12.5056	Centre for Genomic Epidemiology
ERR3562937	WGS	PRJEB34633	SAMEA5982210	CENTRE FOR GENOMIC EPIDEMIOLOGY, NATIONAL FOOD INS	public	ERX3561436	NextSeq 550	Illumina NextSeq	unspecified	PAIRED	RANDOM	METAGENOMIC	wastewater metagenome	ILLUMINA	2019-10-02T00:00:00Z	SAMEA5982210	ERP117567	sra	gs,ncbi,s3	gs.US,ncbi.public,s3.us-east-1	5370626175	Denmark	Europe	2016-09-13						55.695	12.6147	2019-09-30	2019-09-30	2019-09-28	2019-09-28	SAMEA5982210	DTU-GE	Centre for Genomic Epidemiology\, National Food Institute\, Technical University of Denmark (DTU)\, Denmark	2019-09-30T17:04:26Z	2019-09-28T07:10:39Z	public	DTU2017-1116-PRJ1066-CPH-Sewage-142	DTU2017-1116-PRJ1066-CPH-Sewage-142	Denmark	55.695	12.6147	Centre for Genomic Epidemiology
ERR3562938	WGS	PRJEB34633	SAMEA5982211	CENTRE FOR GENOMIC EPIDEMIOLOGY, NATIONAL FOOD INS	public	ERX3561437	NextSeq 550	Illumina NextSeq	unspecified	PAIRED	RANDOM	METAGENOMIC	wastewater metagenome	ILLUMINA	2019-10-02T00:00:00Z	SAMEA5982211	ERP117567					Denmark	Europe	2016-09-18						55.695	12.6147	2019-09-30	2019-09-30	2021-06-25	2019-09-28	SAMEA5982211	DTU-GE	Centre for Genomic Epidemiology\, National Food Institute\, Technical University of Denmark (DTU)\, Denmark	2019-09-30T17:04:26Z	2019-09-28T07:10:39Z	public	DTU2017-1278-PRJ1066-CPH-Sewage-143	DTU2017-1278-PRJ1066-CPH-Sewage-143	Denmark	55.695	12.6147	Centre for Genomic Epidemiology
ERR3562939	WGS	PRJEB34633	SAMEA5982212	CENTRE FOR GENOMIC EPIDEMIOLOGY, NATIONAL FOOD INS	public	ERX3561438	NextSeq 550	Illumina NextSeq	unspecified	PAIRED	RANDOM	METAGENOMIC	wastewater metagenome	ILLUMINA	2019-10-02T00:00:00Z	SAMEA5982212	ERP117567	sra	gs,ncbi,s3	gs.US,ncbi.public,s3.us-east-1	1543388739	Denmark	Europe	2016-09-18						55.6406	12.5056	2019-09-30	2019-09-30	2019-09-28	2019-09-28	SAMEA5982212	DTU-GE	Centre for Genomic Epidemiology\, National Food Institute\, Technical University of Denmark (DTU)\, Denmark	2019-09-30T17:04:26Z	2019-09-28T07:10:39Z	public	DTU2017-1279-PRJ1066-CPH-Sewage-144	DTU2017-1279-PRJ1066-CPH-Sewage-144	Denmark	55.6406	12.5056	Centre for Genomic Epidemiology
ERR3562940	WGS	PRJEB34633	SAMEA5982213	CENTRE FOR GENOMIC EPIDEMIOLOGY, NATIONAL FOOD INS	public	ERX3561439	NextSeq 550	Illumina NextSeq	unspecified	PAIRED	RANDOM	METAGENOMIC	wastewater metagenome	ILLUMINA	2019-10-02T00:00:00Z	SAMEA5982213	ERP117567	sra	gs,ncbi,s3	gs.US,ncbi.public,s3.us-east-1	4072764005	Denmark	Europe	2016-09-21						55.695	12.6147	2019-09-30	2019-09-30	2019-09-28	2019-09-28	SAMEA5982213	DTU-GE	Centre for Genomic Epidemiology\, National Food Institute\, Technical University of Denmark (DTU)\, Denmark	2019-09-30T17:04:26Z	2019-09-28T07:10:39Z	public	DTU2017-1119-PRJ1066-CPH-Sewage-145	DTU2017-1119-PRJ1066-CPH-Sewage-145	Denmark	55.695	12.6147	Centre for Genomic Epidemiology
ERR3562941	WGS	PRJEB34633	SAMEA5982214	CENTRE FOR GENOMIC EPIDEMIOLOGY, NATIONAL FOOD INS	public	ERX3561440	NextSeq 550	Illumina NextSeq	unspecified	PAIRED	RANDOM	METAGENOMIC	wastewater metagenome	ILLUMINA	2019-10-02T00:00:00Z	SAMEA5982214	ERP117567	sra	gs,ncbi,s3	gs.US,ncbi.public,s3.us-east-1	4055786557	Denmark	Europe	2016-09-21						55.6083	12.4503	2019-09-30	2019-09-30	2019-09-28	2019-09-28	SAMEA5982214	DTU-GE	Centre for Genomic Epidemiology\, National Food Institute\, Technical University of Denmark (DTU)\, Denmark	2019-09-30T17:04:26Z	2019-09-28T07:10:39Z	public	DTU2017-1120-PRJ1066-CPH-Sewage-146	DTU2017-1120-PRJ1066-CPH-Sewage-146	Denmark	55.6083	12.4503	Centre for Genomic Epidemiology
ERR3562942	WGS	PRJEB34633	SAMEA5982215	CENTRE FOR GENOMIC EPIDEMIOLOGY, NATIONAL FOOD INS	public	ERX3561441	NextSeq 550	Illumina NextSeq	unspecified	PAIRED	RANDOM	METAGENOMIC	wastewater metagenome	ILLUMINA	2019-10-02T00:00:00Z	SAMEA5982215	ERP117567	sra	gs,ncbi,s3	gs.US,ncbi.public,s3.us-east-1	5111098725	Denmark	Europe	2016-09-21						55.6406	12.5056	2019-09-30	2019-09-30	2019-09-28	2019-09-28	SAMEA5982215	DTU-GE	Centre for Genomic Epidemiology\, National Food Institute\, Technical University of Denmark (DTU)\, Denmark	2019-09-30T17:04:26Z	2019-09-28T07:10:39Z	public	DTU2017-1121-PRJ1066-CPH-Sewage-147	DTU2017-1121-PRJ1066-CPH-Sewage-147	Denmark	55.6406	12.5056	Centre for Genomic Epidemiology
ERR3562943	WGS	PRJEB34633	SAMEA5982216	CENTRE FOR GENOMIC EPIDEMIOLOGY, NATIONAL FOOD INS	public	ERX3561442	NextSeq 550	Illumina NextSeq	unspecified	PAIRED	RANDOM	METAGENOMIC	wastewater metagenome	ILLUMINA	2019-10-02T00:00:00Z	SAMEA5982216	ERP117567	sra	gs,ncbi,s3	gs.US,ncbi.public,s3.us-east-1	4634954002	Denmark	Europe	2016-09-24						55.695	12.6147	2019-09-30	2019-09-30	2019-09-28	2019-09-28	SAMEA5982216	DTU-GE	Centre for Genomic Epidemiology\, National Food Institute\, Technical University of Denmark (DTU)\, Denmark	2019-09-30T17:04:26Z	2019-09-28T07:10:39Z	public	DTU2017-1122-PRJ1066-CPH-Sewage-148	DTU2017-1122-PRJ1066-CPH-Sewage-148	Denmark	55.695	12.6147	Centre for Genomic Epidemiology
ERR3562944	WGS	PRJEB34633	SAMEA5982217	CENTRE FOR GENOMIC EPIDEMIOLOGY, NATIONAL FOOD INS	public	ERX3561443	NextSeq 550	Illumina NextSeq	unspecified	PAIRED	RANDOM	METAGENOMIC	wastewater metagenome	ILLUMINA	2019-10-02T00:00:00Z	SAMEA5982217	ERP117567	sra	gs,ncbi,s3	gs.US,ncbi.public,s3.us-east-1	4617777382	Denmark	Europe	2016-09-29						55.6406	12.5056	2019-09-30	2019-09-30	2019-09-28	2019-09-28	SAMEA5982217	DTU-GE	Centre for Genomic Epidemiology\, National Food Institute\, Technical University of Denmark (DTU)\, Denmark	2019-09-30T17:04:26Z	2019-09-28T07:10:39Z	public	DTU2017-1123-PRJ1066-CPH-Sewage-149	DTU2017-1123-PRJ1066-CPH-Sewage-149	Denmark	55.6406	12.5056	Centre for Genomic Epidemiology
ERR3562945	WGS	PRJEB34633	SAMEA5982218	CENTRE FOR GENOMIC EPIDEMIOLOGY, NATIONAL FOOD INS	public	ERX3561444	NextSeq 550	Illumina NextSeq	unspecified	PAIRED	RANDOM	METAGENOMIC	wastewater metagenome	ILLUMINA	2019-10-02T00:00:00Z	SAMEA5982218	ERP117567	sra	gs,ncbi,s3	gs.US,ncbi.public,s3.us-east-1	3585605433	Denmark	Europe	2016-10-02						55.6406	12.5056	2019-09-30	2019-09-30	2019-09-28	2019-09-28	SAMEA5982218	DTU-GE	Centre for Genomic Epidemiology\, National Food Institute\, Technical University of Denmark (DTU)\, Denmark	2019-09-30T17:04:26Z	2019-09-28T07:10:39Z	public	DTU2017-1124-PRJ1066-CPH-Sewage-150	DTU2017-1124-PRJ1066-CPH-Sewage-150	Denmark	55.6406	12.5056	Centre for Genomic Epidemiology
ERR3562946	WGS	PRJEB34633	SAMEA5982219	CENTRE FOR GENOMIC EPIDEMIOLOGY, NATIONAL FOOD INS	public	ERX3561445	NextSeq 550	Illumina NextSeq	unspecified	PAIRED	RANDOM	METAGENOMIC	wastewater metagenome	ILLUMINA	2019-10-02T00:00:00Z	SAMEA5982219	ERP117567	sra	gs,ncbi,s3	gs.US,ncbi.public,s3.us-east-1	3352211329	Denmark	Europe	2016-10-06						55.695	12.6147	2019-09-30	2019-09-30	2019-09-28	2019-09-28	SAMEA5982219	DTU-GE	Centre for Genomic Epidemiology\, National Food Institute\, Technical University of Denmark (DTU)\, Denmark	2019-09-30T17:04:26Z	2019-09-28T07:10:39Z	public	DTU2017-1125-PRJ1066-CPH-Sewage-151	DTU2017-1125-PRJ1066-CPH-Sewage-151	Denmark	55.695	12.6147	Centre for Genomic Epidemiology
ERR3562947	WGS	PRJEB34633	SAMEA5982220	CENTRE FOR GENOMIC EPIDEMIOLOGY, NATIONAL FOOD INS	public	ERX3561446	NextSeq 550	Illumina NextSeq	unspecified	PAIRED	RANDOM	METAGENOMIC	wastewater metagenome	ILLUMINA	2019-10-02T00:00:00Z	SAMEA5982220	ERP117567	sra	gs,ncbi,s3	gs.US,ncbi.public,s3.us-east-1	3725998656	Denmark	Europe	2016-10-06						55.6083	12.4503	2019-09-30	2019-09-30	2019-09-28	2019-09-28	SAMEA5982220	DTU-GE	Centre for Genomic Epidemiology\, National Food Institute\, Technical University of Denmark (DTU)\, Denmark	2019-09-30T17:04:26Z	2019-09-28T07:10:39Z	public	DTU2017-1126-PRJ1066-CPH-Sewage-152	DTU2017-1126-PRJ1066-CPH-Sewage-152	Denmark	55.6083	12.4503	Centre for Genomic Epidemiology
ERR3562948	WGS	PRJEB34633	SAMEA5982221	CENTRE FOR GENOMIC EPIDEMIOLOGY, NATIONAL FOOD INS	public	ERX3561447	NextSeq 550	Illumina NextSeq	unspecified	PAIRED	RANDOM	METAGENOMIC	wastewater metagenome	ILLUMINA	2019-10-02T00:00:00Z	SAMEA5982221	ERP117567	sra	gs,ncbi,s3	gs.US,ncbi.public,s3.us-east-1	3826236566	Denmark	Europe	2016-10-06						55.6406	12.5056	2019-09-30	2019-09-30	2019-09-28	2019-09-28	SAMEA5982221	DTU-GE	Centre for Genomic Epidemiology\, National Food Institute\, Technical University of Denmark (DTU)\, Denmark	2019-09-30T17:04:26Z	2019-09-28T07:10:39Z	public	DTU2017-1127-PRJ1066-CPH-Sewage-153	DTU2017-1127-PRJ1066-CPH-Sewage-153	Denmark	55.6406	12.5056	Centre for Genomic Epidemiology
ERR3562949	WGS	PRJEB34633	SAMEA5982222	CENTRE FOR GENOMIC EPIDEMIOLOGY, NATIONAL FOOD INS	public	ERX3561448	NextSeq 550	Illumina NextSeq	unspecified	PAIRED	RANDOM	METAGENOMIC	wastewater metagenome	ILLUMINA	2019-10-02T00:00:00Z	SAMEA5982222	ERP117567	sra	gs,ncbi,s3	gs.US,ncbi.public,s3.us-east-1	4638317911	Denmark	Europe	2016-10-09						55.695	12.6147	2019-09-30	2019-09-30	2019-09-28	2019-09-28	SAMEA5982222	DTU-GE	Centre for Genomic Epidemiology\, National Food Institute\, Technical University of Denmark (DTU)\, Denmark	2019-09-30T17:04:26Z	2019-09-28T07:10:39Z	public	DTU2017-1128-PRJ1066-CPH-Sewage-154	DTU2017-1128-PRJ1066-CPH-Sewage-154	Denmark	55.695	12.6147	Centre for Genomic Epidemiology
ERR3562950	WGS	PRJEB34633	SAMEA5982223	CENTRE FOR GENOMIC EPIDEMIOLOGY, NATIONAL FOOD INS	public	ERX3561449	NextSeq 550	Illumina NextSeq	unspecified	PAIRED	RANDOM	METAGENOMIC	wastewater metagenome	ILLUMINA	2019-10-02T00:00:00Z	SAMEA5982223	ERP117567	sra	gs,ncbi,s3	gs.US,ncbi.public,s3.us-east-1	2477993299	Denmark	Europe	2016-10-09						55.6406	12.5056	2019-09-30	2019-09-30	2019-09-28	2019-09-28	SAMEA5982223	DTU-GE	Centre for Genomic Epidemiology\, National Food Institute\, Technical University of Denmark (DTU)\, Denmark	2019-09-30T17:04:26Z	2019-09-28T07:10:39Z	public	DTU2017-1282-PRJ1066-CPH-Sewage-155rerun	DTU2017-1282-PRJ1066-CPH-Sewage-155rerun	Denmark	55.6406	12.5056	Centre for Genomic Epidemiology
ERR3562951	WGS	PRJEB34633	SAMEA5982224	CENTRE FOR GENOMIC EPIDEMIOLOGY, NATIONAL FOOD INS	public	ERX3561450	NextSeq 550	Illumina NextSeq	unspecified	PAIRED	RANDOM	METAGENOMIC	wastewater metagenome	ILLUMINA	2019-10-02T00:00:00Z	SAMEA5982224	ERP117567	sra	gs,ncbi,s3	gs.US,ncbi.public,s3.us-east-1	5027986846	Denmark	Europe	2016-10-12						55.695	12.6147	2019-09-30	2019-09-30	2019-09-28	2019-09-28	SAMEA5982224	DTU-GE	Centre for Genomic Epidemiology\, National Food Institute\, Technical University of Denmark (DTU)\, Denmark	2019-09-30T17:04:26Z	2019-09-28T07:10:39Z	public	DTU2017-1130-PRJ1066-CPH-Sewage-156	DTU2017-1130-PRJ1066-CPH-Sewage-156	Denmark	55.695	12.6147	Centre for Genomic Epidemiology
ERR3562952	WGS	PRJEB34633	SAMEA5982225	CENTRE FOR GENOMIC EPIDEMIOLOGY, NATIONAL FOOD INS	public	ERX3561451	NextSeq 550	Illumina NextSeq	unspecified	PAIRED	RANDOM	METAGENOMIC	wastewater metagenome	ILLUMINA	2019-10-02T00:00:00Z	SAMEA5982225	ERP117567	sra	gs,ncbi,s3	gs.US,ncbi.public,s3.us-east-1	4777904972	Denmark	Europe	2016-10-12						55.6406	12.5056	2019-09-30	2019-09-30	2019-09-28	2019-09-28	SAMEA5982225	DTU-GE	Centre for Genomic Epidemiology\, National Food Institute\, Technical University of Denmark (DTU)\, Denmark	2019-09-30T17:04:26Z	2019-09-28T07:10:39Z	public	DTU2017-1131-PRJ1066-CPH-Sewage-157	DTU2017-1131-PRJ1066-CPH-Sewage-157	Denmark	55.6406	12.5056	Centre for Genomic Epidemiology
ERR3562953	WGS	PRJEB34633	SAMEA5982226	CENTRE FOR GENOMIC EPIDEMIOLOGY, NATIONAL FOOD INS	public	ERX3561452	NextSeq 550	Illumina NextSeq	unspecified	PAIRED	RANDOM	METAGENOMIC	wastewater metagenome	ILLUMINA	2019-10-02T00:00:00Z	SAMEA5982226	ERP117567	sra	gs,ncbi,s3	gs.US,ncbi.public,s3.us-east-1	2271799955	Denmark	Europe	2016-10-15						55.6083	12.4503	2019-09-30	2019-09-30	2019-09-28	2019-09-28	SAMEA5982226	DTU-GE	Centre for Genomic Epidemiology\, National Food Institute\, Technical University of Denmark (DTU)\, Denmark	2019-09-30T17:04:26Z	2019-09-28T07:10:39Z	public	DTU2017-1133-PRJ1066-CPH-Sewage-159	DTU2017-1133-PRJ1066-CPH-Sewage-159	Denmark	55.6083	12.4503	Centre for Genomic Epidemiology
ERR3562954	WGS	PRJEB34633	SAMEA5982227	CENTRE FOR GENOMIC EPIDEMIOLOGY, NATIONAL FOOD INS	public	ERX3561453	NextSeq 550	Illumina NextSeq	unspecified	PAIRED	RANDOM	METAGENOMIC	wastewater metagenome	ILLUMINA	2019-10-02T00:00:00Z	SAMEA5982227	ERP117567	sra	gs,ncbi,s3	gs.US,ncbi.public,s3.us-east-1	3323379399	Denmark	Europe	2016-10-15						55.6406	12.5056	2019-09-30	2019-09-30	2019-09-28	2019-09-28	SAMEA5982227	DTU-GE	Centre for Genomic Epidemiology\, National Food Institute\, Technical University of Denmark (DTU)\, Denmark	2019-09-30T17:04:26Z	2019-09-28T07:10:39Z	public	DTU2017-1134-PRJ1066-CPH-Sewage-160	DTU2017-1134-PRJ1066-CPH-Sewage-160	Denmark	55.6406	12.5056	Centre for Genomic Epidemiology
ERR3562955	WGS	PRJEB34633	SAMEA5982228	CENTRE FOR GENOMIC EPIDEMIOLOGY, NATIONAL FOOD INS	public	ERX3561454	NextSeq 550	Illumina NextSeq	unspecified	PAIRED	RANDOM	METAGENOMIC	wastewater metagenome	ILLUMINA	2019-10-02T00:00:00Z	SAMEA5982228	ERP117567	sra	gs,ncbi,s3	gs.US,ncbi.public,s3.us-east-1	3317365588	Denmark	Europe	2016-10-23						55.695	12.6147	2019-09-30	2019-09-30	2019-09-28	2019-09-28	SAMEA5982228	DTU-GE	Centre for Genomic Epidemiology\, National Food Institute\, Technical University of Denmark (DTU)\, Denmark	2019-09-30T17:04:26Z	2019-09-28T07:10:39Z	public	DTU2017-1135-PRJ1066-CPH-Sewage-161	DTU2017-1135-PRJ1066-CPH-Sewage-161	Denmark	55.695	12.6147	Centre for Genomic Epidemiology
ERR3562956	WGS	PRJEB34633	SAMEA5982229	CENTRE FOR GENOMIC EPIDEMIOLOGY, NATIONAL FOOD INS	public	ERX3561455	NextSeq 550	Illumina NextSeq	unspecified	PAIRED	RANDOM	METAGENOMIC	wastewater metagenome	ILLUMINA	2019-10-02T00:00:00Z	SAMEA5982229	ERP117567	sra	gs,ncbi,s3	gs.US,ncbi.public,s3.us-east-1	3325062064	Denmark	Europe	2016-11-02						55.6406	12.5056	2019-09-30	2019-09-30	2019-09-28	2019-09-28	SAMEA5982229	DTU-GE	Centre for Genomic Epidemiology\, National Food Institute\, Technical University of Denmark (DTU)\, Denmark	2019-09-30T17:04:26Z	2019-09-28T07:10:39Z	public	DTU2017-1136-PRJ1066-CPH-Sewage-162	DTU2017-1136-PRJ1066-CPH-Sewage-162	Denmark	55.6406	12.5056	Centre for Genomic Epidemiology
ERR3562964	WGS	PRJEB34633	SAMEA5982237	CENTRE FOR GENOMIC EPIDEMIOLOGY, NATIONAL FOOD INS	public	ERX3561463	NextSeq 550	Illumina NextSeq	unspecified	PAIRED	RANDOM	METAGENOMIC	wastewater metagenome	ILLUMINA	2019-10-02T00:00:00Z	SAMEA5982237	ERP117567	sra	gs,ncbi,s3	gs.US,ncbi.public,s3.us-east-1	786074805	Denmark	Europe	2016-11-02						55.695	12.6147	2019-09-30	2019-09-30	2019-09-28	2019-09-28	SAMEA5982237	DTU-GE	Centre for Genomic Epidemiology\, National Food Institute\, Technical University of Denmark (DTU)\, Denmark	2019-09-30T17:04:26Z	2019-09-28T07:10:39Z	public	DTU2017-1144-PRJ1066-CPH-Sewage-170	DTU2017-1144-PRJ1066-CPH-Sewage-170	Denmark	55.695	12.6147	Centre for Genomic Epidemiology
ERR3562957	WGS	PRJEB34633	SAMEA5982230	CENTRE FOR GENOMIC EPIDEMIOLOGY, NATIONAL FOOD INS	public	ERX3561456	NextSeq 550	Illumina NextSeq	unspecified	PAIRED	RANDOM	METAGENOMIC	wastewater metagenome	ILLUMINA	2019-10-02T00:00:00Z	SAMEA5982230	ERP117567	sra	gs,ncbi,s3	gs.US,ncbi.public,s3.us-east-1	4425718679	Denmark	Europe	2016-11-05						55.6406	12.5056	2019-09-30	2019-09-30	2019-09-28	2019-09-28	SAMEA5982230	DTU-GE	Centre for Genomic Epidemiology\, National Food Institute\, Technical University of Denmark (DTU)\, Denmark	2019-09-30T17:04:26Z	2019-09-28T07:10:39Z	public	DTU2017-1137-PRJ1066-CPH-Sewage-163	DTU2017-1137-PRJ1066-CPH-Sewage-163	Denmark	55.6406	12.5056	Centre for Genomic Epidemiology
ERR3562958	WGS	PRJEB34633	SAMEA5982231	CENTRE FOR GENOMIC EPIDEMIOLOGY, NATIONAL FOOD INS	public	ERX3561457	NextSeq 550	Illumina NextSeq	unspecified	PAIRED	RANDOM	METAGENOMIC	wastewater metagenome	ILLUMINA	2019-10-02T00:00:00Z	SAMEA5982231	ERP117567	sra	gs,ncbi,s3	gs.US,ncbi.public,s3.us-east-1	1789336107	Denmark	Europe	2016-11-05						55.6083	12.4503	2019-09-30	2019-09-30	2019-09-28	2019-09-28	SAMEA5982231	DTU-GE	Centre for Genomic Epidemiology\, National Food Institute\, Technical University of Denmark (DTU)\, Denmark	2019-09-30T17:04:26Z	2019-09-28T07:10:39Z	public	DTU2017-1138-PRJ1066-CPH-Sewage-164	DTU2017-1138-PRJ1066-CPH-Sewage-164	Denmark	55.6083	12.4503	Centre for Genomic Epidemiology
ERR3562965	WGS	PRJEB34633	SAMEA5982238	CENTRE FOR GENOMIC EPIDEMIOLOGY, NATIONAL FOOD INS	public	ERX3561464	NextSeq 550	Illumina NextSeq	unspecified	PAIRED	RANDOM	METAGENOMIC	wastewater metagenome	ILLUMINA	2019-10-02T00:00:00Z	SAMEA5982238	ERP117567	sra	gs,ncbi,s3	gs.US,ncbi.public,s3.us-east-1	780895929	Denmark	Europe	2016-11-09						55.695	12.6147	2019-09-30	2019-09-30	2019-09-28	2019-09-28	SAMEA5982238	DTU-GE	Centre for Genomic Epidemiology\, National Food Institute\, Technical University of Denmark (DTU)\, Denmark	2019-09-30T17:04:26Z	2019-09-28T07:10:39Z	public	DTU2017-1145-PRJ1066-CPH-Sewage-171	DTU2017-1145-PRJ1066-CPH-Sewage-171	Denmark	55.695	12.6147	Centre for Genomic Epidemiology
ERR3562966	WGS	PRJEB34633	SAMEA5982239	CENTRE FOR GENOMIC EPIDEMIOLOGY, NATIONAL FOOD INS	public	ERX3561465	NextSeq 550	Illumina NextSeq	unspecified	PAIRED	RANDOM	METAGENOMIC	wastewater metagenome	ILLUMINA	2019-10-02T00:00:00Z	SAMEA5982239	ERP117567	sra	gs,ncbi,s3	gs.US,ncbi.public,s3.us-east-1	1083541799	Denmark	Europe	2016-11-09						55.6406	12.5056	2019-09-30	2019-09-30	2019-09-28	2019-09-28	SAMEA5982239	DTU-GE	Centre for Genomic Epidemiology\, National Food Institute\, Technical University of Denmark (DTU)\, Denmark	2019-09-30T17:04:26Z	2019-09-28T07:10:39Z	public	DTU2017-1146-PRJ1066-CPH-Sewage-172	DTU2017-1146-PRJ1066-CPH-Sewage-172	Denmark	55.6406	12.5056	Centre for Genomic Epidemiology
ERR3562959	WGS	PRJEB34633	SAMEA5982232	CENTRE FOR GENOMIC EPIDEMIOLOGY, NATIONAL FOOD INS	public	ERX3561458	NextSeq 550	Illumina NextSeq	unspecified	PAIRED	RANDOM	METAGENOMIC	wastewater metagenome	ILLUMINA	2019-10-02T00:00:00Z	SAMEA5982232	ERP117567	sra	gs,ncbi,s3	gs.US,ncbi.public,s3.us-east-1	8114140355	Denmark	Europe	2016-11-13						55.695	12.6147	2019-09-30	2019-09-30	2019-09-28	2019-09-28	SAMEA5982232	DTU-GE	Centre for Genomic Epidemiology\, National Food Institute\, Technical University of Denmark (DTU)\, Denmark	2019-09-30T17:04:26Z	2019-09-28T07:10:39Z	public	DTU2017-1139-PRJ1066-CPH-Sewage-165	DTU2017-1139-PRJ1066-CPH-Sewage-165	Denmark	55.695	12.6147	Centre for Genomic Epidemiology
ERR3562960	WGS	PRJEB34633	SAMEA5982233	CENTRE FOR GENOMIC EPIDEMIOLOGY, NATIONAL FOOD INS	public	ERX3561459	NextSeq 550	Illumina NextSeq	unspecified	PAIRED	RANDOM	METAGENOMIC	wastewater metagenome	ILLUMINA	2019-10-02T00:00:00Z	SAMEA5982233	ERP117567	sra	gs,ncbi,s3	gs.US,ncbi.public,s3.us-east-1	5397051004	Denmark	Europe	2016-11-13						55.6406	12.5056	2019-09-30	2019-09-30	2019-09-28	2019-09-28	SAMEA5982233	DTU-GE	Centre for Genomic Epidemiology\, National Food Institute\, Technical University of Denmark (DTU)\, Denmark	2019-09-30T17:04:26Z	2019-09-28T07:10:39Z	public	DTU2017-1140-PRJ1066-CPH-Sewage-166	DTU2017-1140-PRJ1066-CPH-Sewage-166	Denmark	55.6406	12.5056	Centre for Genomic Epidemiology
ERR3562961	WGS	PRJEB34633	SAMEA5982234	CENTRE FOR GENOMIC EPIDEMIOLOGY, NATIONAL FOOD INS	public	ERX3561460	NextSeq 550	Illumina NextSeq	unspecified	PAIRED	RANDOM	METAGENOMIC	wastewater metagenome	ILLUMINA	2019-10-02T00:00:00Z	SAMEA5982234	ERP117567	sra	gs,ncbi,s3	gs.US,ncbi.public,s3.us-east-1	4381714443	Denmark	Europe	2016-11-17						55.695	12.6147	2019-09-30	2019-09-30	2019-09-28	2019-09-28	SAMEA5982234	DTU-GE	Centre for Genomic Epidemiology\, National Food Institute\, Technical University of Denmark (DTU)\, Denmark	2019-09-30T17:04:26Z	2019-09-28T07:10:39Z	public	DTU2017-1141-PRJ1066-CPH-Sewage-167	DTU2017-1141-PRJ1066-CPH-Sewage-167	Denmark	55.695	12.6147	Centre for Genomic Epidemiology
ERR3562962	WGS	PRJEB34633	SAMEA5982235	CENTRE FOR GENOMIC EPIDEMIOLOGY, NATIONAL FOOD INS	public	ERX3561461	NextSeq 550	Illumina NextSeq	unspecified	PAIRED	RANDOM	METAGENOMIC	wastewater metagenome	ILLUMINA	2019-10-02T00:00:00Z	SAMEA5982235	ERP117567	sra	gs,ncbi,s3	gs.US,ncbi.public,s3.us-east-1	2930819384	Denmark	Europe	2016-11-17						55.6083	12.4503	2019-09-30	2019-09-30	2019-09-28	2019-09-28	SAMEA5982235	DTU-GE	Centre for Genomic Epidemiology\, National Food Institute\, Technical University of Denmark (DTU)\, Denmark	2019-09-30T17:04:26Z	2019-09-28T07:10:39Z	public	DTU2017-1142-PRJ1066-CPH-Sewage-168	DTU2017-1142-PRJ1066-CPH-Sewage-168	Denmark	55.6083	12.4503	Centre for Genomic Epidemiology
ERR3562963	WGS	PRJEB34633	SAMEA5982236	CENTRE FOR GENOMIC EPIDEMIOLOGY, NATIONAL FOOD INS	public	ERX3561462	NextSeq 550	Illumina NextSeq	unspecified	PAIRED	RANDOM	METAGENOMIC	wastewater metagenome	ILLUMINA	2019-10-02T00:00:00Z	SAMEA5982236	ERP117567	sra	gs,ncbi,s3	gs.US,ncbi.public,s3.us-east-1	856786479	Denmark	Europe	2016-11-17						55.6406	12.5056	2019-09-30	2019-09-30	2019-09-28	2019-09-28	SAMEA5982236	DTU-GE	Centre for Genomic Epidemiology\, National Food Institute\, Technical University of Denmark (DTU)\, Denmark	2019-09-30T17:04:26Z	2019-09-28T07:10:39Z	public	DTU2017-1143-PRJ1066-CPH-Sewage-169	DTU2017-1143-PRJ1066-CPH-Sewage-169	Denmark	55.6406	12.5056	Centre for Genomic Epidemiology
ERR3562967	WGS	PRJEB34633	SAMEA5982240	CENTRE FOR GENOMIC EPIDEMIOLOGY, NATIONAL FOOD INS	public	ERX3561466	NextSeq 550	Illumina NextSeq	unspecified	PAIRED	RANDOM	METAGENOMIC	wastewater metagenome	ILLUMINA	2019-10-02T00:00:00Z	SAMEA5982240	ERP117567	sra	gs,ncbi,s3	gs.US,ncbi.public,s3.us-east-1	1927264998	Denmark	Europe	2016-11-26						55.6406	12.5056	2019-09-30	2019-09-30	2019-09-28	2019-09-28	SAMEA5982240	DTU-GE	Centre for Genomic Epidemiology\, National Food Institute\, Technical University of Denmark (DTU)\, Denmark	2019-09-30T17:04:26Z	2019-09-28T07:10:39Z	public	DTU2017-1147-PRJ1066-CPH-Sewage-173	DTU2017-1147-PRJ1066-CPH-Sewage-173	Denmark	55.6406	12.5056	Centre for Genomic Epidemiology
ERR3562968	WGS	PRJEB34633	SAMEA5982241	CENTRE FOR GENOMIC EPIDEMIOLOGY, NATIONAL FOOD INS	public	ERX3561467	NextSeq 550	Illumina NextSeq	unspecified	PAIRED	RANDOM	METAGENOMIC	wastewater metagenome	ILLUMINA	2019-10-02T00:00:00Z	SAMEA5982241	ERP117567	sra	gs,ncbi,s3	gs.US,ncbi.public,s3.us-east-1	1876041512	Denmark	Europe	2016-11-26						55.695	12.6147	2019-09-30	2019-09-30	2019-09-28	2019-09-28	SAMEA5982241	DTU-GE	Centre for Genomic Epidemiology\, National Food Institute\, Technical University of Denmark (DTU)\, Denmark	2019-09-30T17:04:26Z	2019-09-28T07:10:39Z	public	DTU2017-1148-PRJ1066-CPH-Sewage-174	DTU2017-1148-PRJ1066-CPH-Sewage-174	Denmark	55.695	12.6147	Centre for Genomic Epidemiology
ERR3562969	WGS	PRJEB34633	SAMEA5982242	CENTRE FOR GENOMIC EPIDEMIOLOGY, NATIONAL FOOD INS	public	ERX3561468	NextSeq 550	Illumina NextSeq	unspecified	PAIRED	RANDOM	METAGENOMIC	wastewater metagenome	ILLUMINA	2019-10-02T00:00:00Z	SAMEA5982242	ERP117567	sra	gs,ncbi,s3	gs.US,ncbi.public,s3.us-east-1	1134374665	Denmark	Europe	2016-12-04						55.695	12.6147	2019-09-30	2019-09-30	2019-09-28	2019-09-28	SAMEA5982242	DTU-GE	Centre for Genomic Epidemiology\, National Food Institute\, Technical University of Denmark (DTU)\, Denmark	2019-09-30T17:04:26Z	2019-09-28T07:10:39Z	public	DTU2017-1149-PRJ1066-CPH-Sewage-175	DTU2017-1149-PRJ1066-CPH-Sewage-175	Denmark	55.695	12.6147	Centre for Genomic Epidemiology
ERR3562971	WGS	PRJEB34633	SAMEA5982244	CENTRE FOR GENOMIC EPIDEMIOLOGY, NATIONAL FOOD INS	public	ERX3561470	Illumina MiSeq	Illumina MiSeq	unspecified	PAIRED	RANDOM	METAGENOMIC	wastewater metagenome	ILLUMINA	2019-10-02T00:00:00Z	SAMEA5982244	ERP117567	sra	gs,ncbi,s3	gs.US,ncbi.public,s3.us-east-1	1164079449	Denmark	Europe	2016-12-07						55.695	12.6147	2019-09-30	2019-09-30	2019-09-28	2019-09-28	SAMEA5982244	DTU-GE	Centre for Genomic Epidemiology\, National Food Institute\, Technical University of Denmark (DTU)\, Denmark	2019-09-30T17:04:26Z	2019-09-28T07:10:39Z	public	DTU2017-188-PRJ1066-RL-Sewage-177_S1_L001	DTU2017-188-PRJ1066-RL-Sewage-177_S1_L001	Denmark	55.695	12.6147	Centre for Genomic Epidemiology
ERR3562970	WGS	PRJEB34633	SAMEA5982243	CENTRE FOR GENOMIC EPIDEMIOLOGY, NATIONAL FOOD INS	public	ERX3561469	NextSeq 550	Illumina NextSeq	unspecified	PAIRED	RANDOM	METAGENOMIC	wastewater metagenome	ILLUMINA	2019-10-02T00:00:00Z	SAMEA5982243	ERP117567	sra	gs,ncbi,s3	gs.US,ncbi.public,s3.us-east-1	2144103051	Denmark	Europe	2016-12-07						55.6406	12.5056	2019-09-30	2019-09-30	2019-09-28	2019-09-28	SAMEA5982243	DTU-GE	Centre for Genomic Epidemiology\, National Food Institute\, Technical University of Denmark (DTU)\, Denmark	2019-09-30T17:04:26Z	2019-09-28T07:10:39Z	public	DTU2017-1150-PRJ1066-CPH-Sewage-176	DTU2017-1150-PRJ1066-CPH-Sewage-176	Denmark	55.6406	12.5056	Centre for Genomic Epidemiology
ERR3562972	WGS	PRJEB34633	SAMEA5982245	CENTRE FOR GENOMIC EPIDEMIOLOGY, NATIONAL FOOD INS	public	ERX3561471	Illumina MiSeq	Illumina MiSeq	unspecified	PAIRED	RANDOM	METAGENOMIC	wastewater metagenome	ILLUMINA	2019-10-02T00:00:00Z	SAMEA5982245	ERP117567	sra	gs,ncbi,s3	gs.US,ncbi.public,s3.us-east-1	1449993186	Denmark	Europe	2016-12-09						55.695	12.6147	2019-09-30	2019-09-30	2019-09-28	2019-09-28	SAMEA5982245	DTU-GE	Centre for Genomic Epidemiology\, National Food Institute\, Technical University of Denmark (DTU)\, Denmark	2019-09-30T17:04:26Z	2019-09-28T07:10:39Z	public	DTU2017-20-PRJ1066-RL-Sewage-178_S1_L001	DTU2017-20-PRJ1066-RL-Sewage-178_S1_L001	Denmark	55.695	12.6147	Centre for Genomic Epidemiology
ERR3562973	WGS	PRJEB34633	SAMEA5982246	CENTRE FOR GENOMIC EPIDEMIOLOGY, NATIONAL FOOD INS	public	ERX3561472	Illumina MiSeq	Illumina MiSeq	unspecified	PAIRED	RANDOM	METAGENOMIC	wastewater metagenome	ILLUMINA	2019-10-02T00:00:00Z	SAMEA5982246	ERP117567	sra	gs,ncbi,s3	gs.US,ncbi.public,s3.us-east-1	1474858221	Denmark	Europe	2016-12-12						55.6083	12.4503	2019-09-30	2019-09-30	2019-09-28	2019-09-28	SAMEA5982246	DTU-GE	Centre for Genomic Epidemiology\, National Food Institute\, Technical University of Denmark (DTU)\, Denmark	2019-09-30T17:04:26Z	2019-09-28T07:10:39Z	public	DTU2017-21-PRJ1066-RA-Sewage-179_S2_L001	DTU2017-21-PRJ1066-RA-Sewage-179_S2_L001	Denmark	55.6083	12.4503	Centre for Genomic Epidemiology
ERR3562974	WGS	PRJEB34633	SAMEA5982247	CENTRE FOR GENOMIC EPIDEMIOLOGY, NATIONAL FOOD INS	public	ERX3561473	Illumina MiSeq	Illumina MiSeq	unspecified	PAIRED	RANDOM	METAGENOMIC	wastewater metagenome	ILLUMINA	2019-10-02T00:00:00Z	SAMEA5982247	ERP117567	sra	gs,ncbi,s3	gs.US,ncbi.public,s3.us-east-1	1693425607	Denmark	Europe	2016-12-12						55.6406	12.5056	2019-09-30	2019-09-30	2019-09-28	2019-09-28	SAMEA5982247	DTU-GE	Centre for Genomic Epidemiology\, National Food Institute\, Technical University of Denmark (DTU)\, Denmark	2019-09-30T17:04:26Z	2019-09-28T07:10:39Z	public	DTU2017-22-PRJ1066-RD-Sewage-180_S3_L001	DTU2017-22-PRJ1066-RD-Sewage-180_S3_L001	Denmark	55.6406	12.5056	Centre for Genomic Epidemiology
ERR3562975	WGS	PRJEB34633	SAMEA5982248	CENTRE FOR GENOMIC EPIDEMIOLOGY, NATIONAL FOOD INS	public	ERX3561474	Illumina MiSeq	Illumina MiSeq	unspecified	PAIRED	RANDOM	METAGENOMIC	wastewater metagenome	ILLUMINA	2019-10-02T00:00:00Z	SAMEA5982248	ERP117567	sra	gs,ncbi,s3	gs.US,ncbi.public,s3.us-east-1	20430838	Denmark	Europe	2016-12-12						55.695	12.6147	2019-09-30	2019-09-30	2019-09-28	2019-09-28	SAMEA5982248	DTU-GE	Centre for Genomic Epidemiology\, National Food Institute\, Technical University of Denmark (DTU)\, Denmark	2019-09-30T17:04:26Z	2019-09-28T07:10:39Z	public	DTU2017-23-PRJ1066-RL-Sewage-181_S4_L001	DTU2017-23-PRJ1066-RL-Sewage-181_S4_L001	Denmark	55.695	12.6147	Centre for Genomic Epidemiology
ERR3562976	WGS	PRJEB34633	SAMEA5982249	CENTRE FOR GENOMIC EPIDEMIOLOGY, NATIONAL FOOD INS	public	ERX3561475	Illumina MiSeq	Illumina MiSeq	unspecified	PAIRED	RANDOM	METAGENOMIC	wastewater metagenome	ILLUMINA	2019-10-02T00:00:00Z	SAMEA5982249	ERP117567	sra	gs,ncbi,s3	gs.US,ncbi.public,s3.us-east-1	1009808651	Denmark	Europe	2016-12-12						55.695	12.6147	2019-09-30	2019-09-30	2019-09-28	2019-09-28	SAMEA5982249	DTU-GE	Centre for Genomic Epidemiology\, National Food Institute\, Technical University of Denmark (DTU)\, Denmark	2019-09-30T17:04:26Z	2019-09-28T07:10:39Z	public	DTU2017-189-PRJ1066-RL-Sewage-181_S2_L001	DTU2017-189-PRJ1066-RL-Sewage-181_S2_L001	Denmark	55.695	12.6147	Centre for Genomic Epidemiology
ERR3562977	WGS	PRJEB34633	SAMEA5982250	CENTRE FOR GENOMIC EPIDEMIOLOGY, NATIONAL FOOD INS	public	ERX3561476	Illumina MiSeq	Illumina MiSeq	unspecified	PAIRED	RANDOM	METAGENOMIC	wastewater metagenome	ILLUMINA	2019-10-02T00:00:00Z	SAMEA5982250	ERP117567	sra	gs,ncbi,s3	gs.US,ncbi.public,s3.us-east-1	1534609411	Denmark	Europe	2016-12-18						55.6406	12.5056	2019-09-30	2019-09-30	2019-09-28	2019-09-28	SAMEA5982250	DTU-GE	Centre for Genomic Epidemiology\, National Food Institute\, Technical University of Denmark (DTU)\, Denmark	2019-09-30T17:04:26Z	2019-09-28T07:10:39Z	public	DTU2017-24-PRJ1066-RD-Sewage-182_S5_L001	DTU2017-24-PRJ1066-RD-Sewage-182_S5_L001	Denmark	55.6406	12.5056	Centre for Genomic Epidemiology
ERR3562978	WGS	PRJEB34633	SAMEA5982251	CENTRE FOR GENOMIC EPIDEMIOLOGY, NATIONAL FOOD INS	public	ERX3561477	Illumina MiSeq	Illumina MiSeq	unspecified	PAIRED	RANDOM	METAGENOMIC	wastewater metagenome	ILLUMINA	2019-10-02T00:00:00Z	SAMEA5982251	ERP117567	sra	gs,ncbi,s3	gs.US,ncbi.public,s3.us-east-1	1377576701	Denmark	Europe	2016-12-18						55.6083	12.4503	2019-09-30	2019-09-30	2019-09-28	2019-09-28	SAMEA5982251	DTU-GE	Centre for Genomic Epidemiology\, National Food Institute\, Technical University of Denmark (DTU)\, Denmark	2019-09-30T17:04:26Z	2019-09-28T07:10:39Z	public	DTU2017-25-PRJ1066-RA-Sewage-183_S6_L001	DTU2017-25-PRJ1066-RA-Sewage-183_S6_L001	Denmark	55.6083	12.4503	Centre for Genomic Epidemiology
ERR3562979	WGS	PRJEB34633	SAMEA5982252	CENTRE FOR GENOMIC EPIDEMIOLOGY, NATIONAL FOOD INS	public	ERX3561478	Illumina MiSeq	Illumina MiSeq	unspecified	PAIRED	RANDOM	METAGENOMIC	wastewater metagenome	ILLUMINA	2019-10-02T00:00:00Z	SAMEA5982252	ERP117567	sra	gs,ncbi,s3	gs.US,ncbi.public,s3.us-east-1	807641737	Denmark	Europe	2016-12-19						55.6406	12.5056	2019-09-30	2019-09-30	2019-09-28	2019-09-28	SAMEA5982252	DTU-GE	Centre for Genomic Epidemiology\, National Food Institute\, Technical University of Denmark (DTU)\, Denmark	2019-09-30T17:04:26Z	2019-09-28T07:10:39Z	public	DTU2017-26-PRJ1066-RD-Sewage-184_S1_L001	DTU2017-26-PRJ1066-RD-Sewage-184_S1_L001	Denmark	55.6406	12.5056	Centre for Genomic Epidemiology
ERR3562980	WGS	PRJEB34633	SAMEA5982253	CENTRE FOR GENOMIC EPIDEMIOLOGY, NATIONAL FOOD INS	public	ERX3561479	Illumina MiSeq	Illumina MiSeq	unspecified	PAIRED	RANDOM	METAGENOMIC	wastewater metagenome	ILLUMINA	2019-10-02T00:00:00Z	SAMEA5982253	ERP117567	sra	gs,ncbi,s3	gs.US,ncbi.public,s3.us-east-1	872874532	Denmark	Europe	2016-12-19						55.695	12.6147	2019-09-30	2019-09-30	2019-09-28	2019-09-28	SAMEA5982253	DTU-GE	Centre for Genomic Epidemiology\, National Food Institute\, Technical University of Denmark (DTU)\, Denmark	2019-09-30T17:04:26Z	2019-09-28T07:10:40Z	public	DTU2017-27-PRJ1066-RL-Sewage-185_S2_L001	DTU2017-27-PRJ1066-RL-Sewage-185_S2_L001	Denmark	55.695	12.6147	Centre for Genomic Epidemiology
ERR3562981	WGS	PRJEB34633	SAMEA5982254	CENTRE FOR GENOMIC EPIDEMIOLOGY, NATIONAL FOOD INS	public	ERX3561480	Illumina MiSeq	Illumina MiSeq	unspecified	PAIRED	RANDOM	METAGENOMIC	wastewater metagenome	ILLUMINA	2019-10-02T00:00:00Z	SAMEA5982254	ERP117567	sra	gs,ncbi,s3	gs.US,ncbi.public,s3.us-east-1	920051269	Denmark	Europe	2016-12-22						55.6406	12.5056	2019-09-30	2019-09-30	2019-09-28	2019-09-28	SAMEA5982254	DTU-GE	Centre for Genomic Epidemiology\, National Food Institute\, Technical University of Denmark (DTU)\, Denmark	2019-09-30T17:04:26Z	2019-09-28T07:10:40Z	public	DTU2017-28-PRJ1066-RD-Sewage-186_S3_L001	DTU2017-28-PRJ1066-RD-Sewage-186_S3_L001	Denmark	55.6406	12.5056	Centre for Genomic Epidemiology
ERR3562982	WGS	PRJEB34633	SAMEA5982255	CENTRE FOR GENOMIC EPIDEMIOLOGY, NATIONAL FOOD INS	public	ERX3561481	Illumina MiSeq	Illumina MiSeq	unspecified	PAIRED	RANDOM	METAGENOMIC	wastewater metagenome	ILLUMINA	2019-10-02T00:00:00Z	SAMEA5982255	ERP117567	sra	gs,ncbi,s3	gs.US,ncbi.public,s3.us-east-1	526801899	Denmark	Europe	2016-12-22						55.695	12.6147	2019-09-30	2019-09-30	2019-09-28	2019-09-28	SAMEA5982255	DTU-GE	Centre for Genomic Epidemiology\, National Food Institute\, Technical University of Denmark (DTU)\, Denmark	2019-09-30T17:04:26Z	2019-09-28T07:10:40Z	public	DTU2017-29-PRJ1066-RL-Sewage-187_S4_L001	DTU2017-29-PRJ1066-RL-Sewage-187_S4_L001	Denmark	55.695	12.6147	Centre for Genomic Epidemiology
ERR3562983	WGS	PRJEB34633	SAMEA5982256	CENTRE FOR GENOMIC EPIDEMIOLOGY, NATIONAL FOOD INS	public	ERX3561482	Illumina MiSeq	Illumina MiSeq	unspecified	PAIRED	RANDOM	METAGENOMIC	wastewater metagenome	ILLUMINA	2019-10-02T00:00:00Z	SAMEA5982256	ERP117567	sra	gs,ncbi,s3	gs.US,ncbi.public,s3.us-east-1	1327538825	Denmark	Europe	2017-01-01						55.6406	12.5056	2019-09-30	2019-09-30	2019-09-28	2019-09-28	SAMEA5982256	DTU-GE	Centre for Genomic Epidemiology\, National Food Institute\, Technical University of Denmark (DTU)\, Denmark	2019-09-30T17:04:26Z	2019-09-28T07:10:40Z	public	DTU2017-30-PRJ1066-RD-Sewage-188_S5_L001	DTU2017-30-PRJ1066-RD-Sewage-188_S5_L001	Denmark	55.6406	12.5056	Centre for Genomic Epidemiology
ERR3562984	WGS	PRJEB34633	SAMEA5982257	CENTRE FOR GENOMIC EPIDEMIOLOGY, NATIONAL FOOD INS	public	ERX3561483	Illumina MiSeq	Illumina MiSeq	unspecified	PAIRED	RANDOM	METAGENOMIC	wastewater metagenome	ILLUMINA	2019-10-02T00:00:00Z	SAMEA5982257	ERP117567	sra	gs,ncbi,s3	gs.US,ncbi.public,s3.us-east-1	1594523531	Denmark	Europe	2017-01-01						55.695	12.6147	2019-09-30	2019-09-30	2019-09-28	2019-09-28	SAMEA5982257	DTU-GE	Centre for Genomic Epidemiology\, National Food Institute\, Technical University of Denmark (DTU)\, Denmark	2019-09-30T17:04:26Z	2019-09-28T07:10:40Z	public	DTU2017-31-PRJ1066-RL-Sewage-189_S6_L001	DTU2017-31-PRJ1066-RL-Sewage-189_S6_L001	Denmark	55.695	12.6147	Centre for Genomic Epidemiology
ERR3562985	WGS	PRJEB34633	SAMEA5982258	CENTRE FOR GENOMIC EPIDEMIOLOGY, NATIONAL FOOD INS	public	ERX3561484	Illumina MiSeq	Illumina MiSeq	unspecified	PAIRED	RANDOM	METAGENOMIC	wastewater metagenome	ILLUMINA	2019-10-02T00:00:00Z	SAMEA5982258	ERP117567	sra	gs,ncbi,s3	gs.US,ncbi.public,s3.us-east-1	1179459404	Denmark	Europe	2017-01-04						55.695	12.6147	2019-09-30	2019-09-30	2019-09-28	2019-09-28	SAMEA5982258	DTU-GE	Centre for Genomic Epidemiology\, National Food Institute\, Technical University of Denmark (DTU)\, Denmark	2019-09-30T17:04:26Z	2019-09-28T07:10:40Z	public	DTU2017-190-PRJ1066-RL-Sewage-190_S3_L001	DTU2017-190-PRJ1066-RL-Sewage-190_S3_L001	Denmark	55.695	12.6147	Centre for Genomic Epidemiology
ERR3562991	WGS	PRJEB34633	SAMEA5982264	CENTRE FOR GENOMIC EPIDEMIOLOGY, NATIONAL FOOD INS	public	ERX3561490	Illumina MiSeq	Illumina MiSeq	unspecified	PAIRED	RANDOM	METAGENOMIC	wastewater metagenome	ILLUMINA	2019-10-02T00:00:00Z	SAMEA5982264	ERP117567	sra	gs,ncbi,s3	gs.US,ncbi.public,s3.us-east-1	851695774	Denmark	Europe	2017-01-04						55.6083	12.4503	2019-09-30	2019-09-30	2019-09-28	2019-09-28	SAMEA5982264	DTU-GE	Centre for Genomic Epidemiology\, National Food Institute\, Technical University of Denmark (DTU)\, Denmark	2019-09-30T17:04:26Z	2019-09-28T07:10:40Z	public	DTU2017-197-PRJ1066-RA-Sewage-196_S4_L001	DTU2017-197-PRJ1066-RA-Sewage-196_S4_L001	Denmark	55.6083	12.4503	Centre for Genomic Epidemiology
ERR3562986	WGS	PRJEB34633	SAMEA5982259	CENTRE FOR GENOMIC EPIDEMIOLOGY, NATIONAL FOOD INS	public	ERX3561485	Illumina MiSeq	Illumina MiSeq	unspecified	PAIRED	RANDOM	METAGENOMIC	wastewater metagenome	ILLUMINA	2019-10-02T00:00:00Z	SAMEA5982259	ERP117567	sra	gs,ncbi,s3	gs.US,ncbi.public,s3.us-east-1	1089274890	Denmark	Europe	2017-01-08						55.6406	12.5056	2019-09-30	2019-09-30	2019-09-28	2019-09-28	SAMEA5982259	DTU-GE	Centre for Genomic Epidemiology\, National Food Institute\, Technical University of Denmark (DTU)\, Denmark	2019-09-30T17:04:26Z	2019-09-28T07:10:40Z	public	DTU2017-191-PRJ1066-RD-Sewage-191_S4_L001	DTU2017-191-PRJ1066-RD-Sewage-191_S4_L001	Denmark	55.6406	12.5056	Centre for Genomic Epidemiology
ERR3562987	WGS	PRJEB34633	SAMEA5982260	CENTRE FOR GENOMIC EPIDEMIOLOGY, NATIONAL FOOD INS	public	ERX3561486	Illumina MiSeq	Illumina MiSeq	unspecified	PAIRED	RANDOM	METAGENOMIC	wastewater metagenome	ILLUMINA	2019-10-02T00:00:00Z	SAMEA5982260	ERP117567	sra	gs,ncbi,s3	gs.US,ncbi.public,s3.us-east-1	1531776998	Denmark	Europe	2017-01-08						55.695	12.6147	2019-09-30	2019-09-30	2019-09-28	2019-09-28	SAMEA5982260	DTU-GE	Centre for Genomic Epidemiology\, National Food Institute\, Technical University of Denmark (DTU)\, Denmark	2019-09-30T17:04:26Z	2019-09-28T07:10:40Z	public	DTU2017-192-PRJ1066-RL-Sewage-192_S5_L001	DTU2017-192-PRJ1066-RL-Sewage-192_S5_L001	Denmark	55.695	12.6147	Centre for Genomic Epidemiology
ERR3562988	WGS	PRJEB34633	SAMEA5982261	CENTRE FOR GENOMIC EPIDEMIOLOGY, NATIONAL FOOD INS	public	ERX3561487	Illumina MiSeq	Illumina MiSeq	unspecified	PAIRED	RANDOM	METAGENOMIC	wastewater metagenome	ILLUMINA	2019-10-02T00:00:00Z	SAMEA5982261	ERP117567	sra	gs,ncbi,s3	gs.US,ncbi.public,s3.us-east-1	1214117881	Denmark	Europe	2017-01-12						55.6406	12.5056	2019-09-30	2019-09-30	2019-09-28	2019-09-28	SAMEA5982261	DTU-GE	Centre for Genomic Epidemiology\, National Food Institute\, Technical University of Denmark (DTU)\, Denmark	2019-09-30T17:04:26Z	2019-09-28T07:10:40Z	public	DTU2017-193-PRJ1066-RD-Sewage-193_S6_L001	DTU2017-193-PRJ1066-RD-Sewage-193_S6_L001	Denmark	55.6406	12.5056	Centre for Genomic Epidemiology
ERR3562989	WGS	PRJEB34633	SAMEA5982262	CENTRE FOR GENOMIC EPIDEMIOLOGY, NATIONAL FOOD INS	public	ERX3561488	Illumina MiSeq	Illumina MiSeq	unspecified	PAIRED	RANDOM	METAGENOMIC	wastewater metagenome	ILLUMINA	2019-10-02T00:00:00Z	SAMEA5982262	ERP117567	sra	gs,ncbi,s3	gs.US,ncbi.public,s3.us-east-1	897616019	Denmark	Europe	2017-01-12						55.695	12.6147	2019-09-30	2019-09-30	2019-09-28	2019-09-28	SAMEA5982262	DTU-GE	Centre for Genomic Epidemiology\, National Food Institute\, Technical University of Denmark (DTU)\, Denmark	2019-09-30T17:04:26Z	2019-09-28T07:10:40Z	public	DTU2017-195-PRJ1066-RL-Sewage-194_S2_L001	DTU2017-195-PRJ1066-RL-Sewage-194_S2_L001	Denmark	55.695	12.6147	Centre for Genomic Epidemiology
ERR3562990	WGS	PRJEB34633	SAMEA5982263	CENTRE FOR GENOMIC EPIDEMIOLOGY, NATIONAL FOOD INS	public	ERX3561489	Illumina MiSeq	Illumina MiSeq	unspecified	PAIRED	RANDOM	METAGENOMIC	wastewater metagenome	ILLUMINA	2019-10-02T00:00:00Z	SAMEA5982263	ERP117567	sra	gs,ncbi,s3	gs.US,ncbi.public,s3.us-east-1	862101053	Denmark	Europe	2017-01-16						55.6406	12.5056	2019-09-30	2019-09-30	2019-09-28	2019-09-28	SAMEA5982263	DTU-GE	Centre for Genomic Epidemiology\, National Food Institute\, Technical University of Denmark (DTU)\, Denmark	2019-09-30T17:04:26Z	2019-09-28T07:10:40Z	public	DTU2017-196-PRJ1066-RD-Sewage-195_S3_L001	DTU2017-196-PRJ1066-RD-Sewage-195_S3_L001	Denmark	55.6406	12.5056	Centre for Genomic Epidemiology
ERR3562992	WGS	PRJEB34633	SAMEA5982265	CENTRE FOR GENOMIC EPIDEMIOLOGY, NATIONAL FOOD INS	public	ERX3561491	Illumina MiSeq	Illumina MiSeq	unspecified	PAIRED	RANDOM	METAGENOMIC	wastewater metagenome	ILLUMINA	2019-10-02T00:00:00Z	SAMEA5982265	ERP117567	sra	gs,ncbi,s3	gs.US,ncbi.public,s3.us-east-1	959793791	Denmark	Europe	2017-01-18						55.6083	12.4503	2019-09-30	2019-09-30	2019-09-28	2019-09-28	SAMEA5982265	DTU-GE	Centre for Genomic Epidemiology\, National Food Institute\, Technical University of Denmark (DTU)\, Denmark	2019-09-30T17:04:26Z	2019-09-28T07:10:40Z	public	DTU2017-198-PRJ1066-RA-Sewage-197_S5_L001	DTU2017-198-PRJ1066-RA-Sewage-197_S5_L001	Denmark	55.6083	12.4503	Centre for Genomic Epidemiology
ERR3562993	WGS	PRJEB34633	SAMEA5982266	CENTRE FOR GENOMIC EPIDEMIOLOGY, NATIONAL FOOD INS	public	ERX3561492	Illumina MiSeq	Illumina MiSeq	unspecified	PAIRED	RANDOM	METAGENOMIC	wastewater metagenome	ILLUMINA	2019-10-02T00:00:00Z	SAMEA5982266	ERP117567	sra	gs,ncbi,s3	gs.US,ncbi.public,s3.us-east-1	1128649521	Denmark	Europe	2017-01-24						55.6406	12.5056	2019-09-30	2019-09-30	2019-09-28	2019-09-28	SAMEA5982266	DTU-GE	Centre for Genomic Epidemiology\, National Food Institute\, Technical University of Denmark (DTU)\, Denmark	2019-09-30T17:04:26Z	2019-09-28T07:10:40Z	public	DTU2017-199-PRJ1066-RD-Sewage-198_S6_L001	DTU2017-199-PRJ1066-RD-Sewage-198_S6_L001	Denmark	55.6406	12.5056	Centre for Genomic Epidemiology
ERR3562994	WGS	PRJEB34633	SAMEA5982267	CENTRE FOR GENOMIC EPIDEMIOLOGY, NATIONAL FOOD INS	public	ERX3561493	Illumina MiSeq	Illumina MiSeq	unspecified	PAIRED	RANDOM	METAGENOMIC	wastewater metagenome	ILLUMINA	2019-10-02T00:00:00Z	SAMEA5982267	ERP117567	sra	gs,ncbi,s3	gs.US,ncbi.public,s3.us-east-1	841699663	Denmark	Europe	2017-01-24						55.695	12.6147	2019-09-30	2019-09-30	2019-09-28	2019-09-28	SAMEA5982267	DTU-GE	Centre for Genomic Epidemiology\, National Food Institute\, Technical University of Denmark (DTU)\, Denmark	2019-09-30T17:04:26Z	2019-09-28T07:10:40Z	public	DTU2017-200-PRJ1066-RL-Sewage-199_S7_L001	DTU2017-200-PRJ1066-RL-Sewage-199_S7_L001	Denmark	55.695	12.6147	Centre for Genomic Epidemiology
ERR3562995	WGS	PRJEB34633	SAMEA5982268	CENTRE FOR GENOMIC EPIDEMIOLOGY, NATIONAL FOOD INS	public	ERX3561494	Illumina MiSeq	Illumina MiSeq	unspecified	PAIRED	RANDOM	METAGENOMIC	wastewater metagenome	ILLUMINA	2019-10-02T00:00:00Z	SAMEA5982268	ERP117567	sra	gs,ncbi,s3	gs.US,ncbi.public,s3.us-east-1	715907617	Denmark	Europe	2017-01-27						55.6406	12.5056	2019-09-30	2019-09-30	2019-09-28	2019-09-28	SAMEA5982268	DTU-GE	Centre for Genomic Epidemiology\, National Food Institute\, Technical University of Denmark (DTU)\, Denmark	2019-09-30T17:04:26Z	2019-09-28T07:10:40Z	public	DTU2017-289-PRJ1066-RD-Sewage-200_S1_L001	DTU2017-289-PRJ1066-RD-Sewage-200_S1_L001	Denmark	55.6406	12.5056	Centre for Genomic Epidemiology
ERR3562996	WGS	PRJEB34633	SAMEA5982269	CENTRE FOR GENOMIC EPIDEMIOLOGY, NATIONAL FOOD INS	public	ERX3561495	Illumina MiSeq	Illumina MiSeq	unspecified	PAIRED	RANDOM	METAGENOMIC	wastewater metagenome	ILLUMINA	2019-10-02T00:00:00Z	SAMEA5982269	ERP117567	sra	gs,ncbi,s3	gs.US,ncbi.public,s3.us-east-1	1010077695	Denmark	Europe	2017-01-27						55.695	12.6147	2019-09-30	2019-09-30	2019-09-28	2019-09-28	SAMEA5982269	DTU-GE	Centre for Genomic Epidemiology\, National Food Institute\, Technical University of Denmark (DTU)\, Denmark	2019-09-30T17:04:26Z	2019-09-28T07:10:40Z	public	DTU2017-290-PRJ1066-RL-Sewage-201_S2_L001	DTU2017-290-PRJ1066-RL-Sewage-201_S2_L001	Denmark	55.695	12.6147	Centre for Genomic Epidemiology
ERR3562997	WGS	PRJEB34633	SAMEA5982270	CENTRE FOR GENOMIC EPIDEMIOLOGY, NATIONAL FOOD INS	public	ERX3561496	Illumina MiSeq	Illumina MiSeq	unspecified	PAIRED	RANDOM	METAGENOMIC	wastewater metagenome	ILLUMINA	2019-10-02T00:00:00Z	SAMEA5982270	ERP117567	sra	gs,ncbi,s3	gs.US,ncbi.public,s3.us-east-1	969514245	Denmark	Europe	2017-02-02						55.6406	12.5056	2019-09-30	2019-09-30	2019-09-28	2019-09-28	SAMEA5982270	DTU-GE	Centre for Genomic Epidemiology\, National Food Institute\, Technical University of Denmark (DTU)\, Denmark	2019-09-30T17:04:26Z	2019-09-28T07:10:40Z	public	DTU2017-291-PRJ1066-RD-Sewage-202_S3_L001	DTU2017-291-PRJ1066-RD-Sewage-202_S3_L001	Denmark	55.6406	12.5056	Centre for Genomic Epidemiology
ERR3563001	WGS	PRJEB34633	SAMEA5982274	CENTRE FOR GENOMIC EPIDEMIOLOGY, NATIONAL FOOD INS	public	ERX3561500	Illumina MiSeq	Illumina MiSeq	unspecified	PAIRED	RANDOM	METAGENOMIC	wastewater metagenome	ILLUMINA	2019-10-02T00:00:00Z	SAMEA5982274	ERP117567	fastq,sra	gs,ncbi,s3	gs.US,ncbi.public,s3.us-east-1	788823967	Denmark	Europe	2017-02-02	217	1197958066				55.695	12.6147	2019-09-30	2019-09-30	2019-09-28	2019-09-28	SAMEA5982274	DTU-GE	Centre for Genomic Epidemiology\, National Food Institute\, Technical University of Denmark (DTU)\, Denmark	2019-09-30T17:04:26Z	2019-09-28T07:10:40Z	public	DTU2017-295-PRJ1066-RL-Sewage-206_S1_L001	DTU2017-295-PRJ1066-RL-Sewage-206_S1_L001	Denmark	55.695	12.6147	Centre for Genomic Epidemiology
ERR3563002	WGS	PRJEB34633	SAMEA5982275	CENTRE FOR GENOMIC EPIDEMIOLOGY, NATIONAL FOOD INS	public	ERX3561501	Illumina MiSeq	Illumina MiSeq	unspecified	PAIRED	RANDOM	METAGENOMIC	wastewater metagenome	ILLUMINA	2019-10-02T00:00:00Z	SAMEA5982275	ERP117567	sra	gs,ncbi,s3	gs.US,ncbi.public,s3.us-east-1	1143459324	Denmark	Europe	2017-02-02						55.6083	12.4503	2019-09-30	2019-09-30	2019-09-28	2019-09-28	SAMEA5982275	DTU-GE	Centre for Genomic Epidemiology\, National Food Institute\, Technical University of Denmark (DTU)\, Denmark	2019-09-30T17:04:26Z	2019-09-28T07:10:40Z	public	DTU2017-296-PRJ1066-RA-Sewage-207_S2_L001	DTU2017-296-PRJ1066-RA-Sewage-207_S2_L001	Denmark	55.6083	12.4503	Centre for Genomic Epidemiology
ERR3562998	WGS	PRJEB34633	SAMEA5982271	CENTRE FOR GENOMIC EPIDEMIOLOGY, NATIONAL FOOD INS	public	ERX3561497	Illumina MiSeq	Illumina MiSeq	unspecified	PAIRED	RANDOM	METAGENOMIC	wastewater metagenome	ILLUMINA	2019-10-02T00:00:00Z	SAMEA5982271	ERP117567	sra	gs,ncbi,s3	gs.US,ncbi.public,s3.us-east-1	814592553	Denmark	Europe	2017-02-07						55.6406	12.5056	2019-09-30	2019-09-30	2019-09-28	2019-09-28	SAMEA5982271	DTU-GE	Centre for Genomic Epidemiology\, National Food Institute\, Technical University of Denmark (DTU)\, Denmark	2019-09-30T17:04:26Z	2019-09-28T07:10:40Z	public	DTU2017-292-PRJ1066-RD-Sewage-203_S4_L001	DTU2017-292-PRJ1066-RD-Sewage-203_S4_L001	Denmark	55.6406	12.5056	Centre for Genomic Epidemiology
ERR3562999	WGS	PRJEB34633	SAMEA5982272	CENTRE FOR GENOMIC EPIDEMIOLOGY, NATIONAL FOOD INS	public	ERX3561498	Illumina MiSeq	Illumina MiSeq	unspecified	PAIRED	RANDOM	METAGENOMIC	wastewater metagenome	ILLUMINA	2019-10-02T00:00:00Z	SAMEA5982272	ERP117567	sra	gs,ncbi,s3	gs.US,ncbi.public,s3.us-east-1	1088376426	Denmark	Europe	2017-02-07						55.695	12.6147	2019-09-30	2019-09-30	2019-09-28	2019-09-28	SAMEA5982272	DTU-GE	Centre for Genomic Epidemiology\, National Food Institute\, Technical University of Denmark (DTU)\, Denmark	2019-09-30T17:04:26Z	2019-09-28T07:10:40Z	public	DTU2017-293-PRJ1066-RL-Sewage-204_S5_L001	DTU2017-293-PRJ1066-RL-Sewage-204_S5_L001	Denmark	55.695	12.6147	Centre for Genomic Epidemiology
ERR3563000	WGS	PRJEB34633	SAMEA5982273	CENTRE FOR GENOMIC EPIDEMIOLOGY, NATIONAL FOOD INS	public	ERX3561499	Illumina MiSeq	Illumina MiSeq	unspecified	PAIRED	RANDOM	METAGENOMIC	wastewater metagenome	ILLUMINA	2019-10-02T00:00:00Z	SAMEA5982273	ERP117567	sra	gs,ncbi,s3	gs.US,ncbi.public,s3.us-east-1	1413492428	Denmark	Europe	2017-02-11						55.6406	12.5056	2019-09-30	2019-09-30	2019-09-28	2019-09-28	SAMEA5982273	DTU-GE	Centre for Genomic Epidemiology\, National Food Institute\, Technical University of Denmark (DTU)\, Denmark	2019-09-30T17:04:26Z	2019-09-28T07:10:40Z	public	DTU2017-294-PRJ1066-RD-Sewage-205_S6_L001	DTU2017-294-PRJ1066-RD-Sewage-205_S6_L001	Denmark	55.6406	12.5056	Centre for Genomic Epidemiology
ERR3563003	WGS	PRJEB34633	SAMEA5982276	CENTRE FOR GENOMIC EPIDEMIOLOGY, NATIONAL FOOD INS	public	ERX3561502	Illumina MiSeq	Illumina MiSeq	unspecified	PAIRED	RANDOM	METAGENOMIC	wastewater metagenome	ILLUMINA	2019-10-02T00:00:00Z	SAMEA5982276	ERP117567	sra	gs,ncbi,s3	gs.US,ncbi.public,s3.us-east-1	1538226403	Denmark	Europe	2017-02-11						55.695	12.6147	2019-09-30	2019-09-30	2019-09-28	2019-09-28	SAMEA5982276	DTU-GE	Centre for Genomic Epidemiology\, National Food Institute\, Technical University of Denmark (DTU)\, Denmark	2019-09-30T17:04:26Z	2019-09-28T07:10:40Z	public	DTU2017-297-PRJ1066-RL-Sewage-208_S3_L001	DTU2017-297-PRJ1066-RL-Sewage-208_S3_L001	Denmark	55.695	12.6147	Centre for Genomic Epidemiology
ERR3563004	WGS	PRJEB34633	SAMEA5982277	CENTRE FOR GENOMIC EPIDEMIOLOGY, NATIONAL FOOD INS	public	ERX3561503	Illumina MiSeq	Illumina MiSeq	unspecified	PAIRED	RANDOM	METAGENOMIC	wastewater metagenome	ILLUMINA	2019-10-02T00:00:00Z	SAMEA5982277	ERP117567	sra	gs,ncbi,s3	gs.US,ncbi.public,s3.us-east-1	1117695966	Denmark	Europe	2017-02-13						55.6406	12.5056	2019-09-30	2019-09-30	2019-09-28	2019-09-28	SAMEA5982277	DTU-GE	Centre for Genomic Epidemiology\, National Food Institute\, Technical University of Denmark (DTU)\, Denmark	2019-09-30T17:04:26Z	2019-09-28T07:10:40Z	public	DTU2017-298-PRJ1066-RD-Sewage-209_S4_L001	DTU2017-298-PRJ1066-RD-Sewage-209_S4_L001	Denmark	55.6406	12.5056	Centre for Genomic Epidemiology
ERR3563005	WGS	PRJEB34633	SAMEA5982278	CENTRE FOR GENOMIC EPIDEMIOLOGY, NATIONAL FOOD INS	public	ERX3561504	Illumina MiSeq	Illumina MiSeq	unspecified	PAIRED	RANDOM	METAGENOMIC	wastewater metagenome	ILLUMINA	2019-10-02T00:00:00Z	SAMEA5982278	ERP117567	sra	gs,ncbi,s3	gs.US,ncbi.public,s3.us-east-1	1633576016	Denmark	Europe	2017-02-13						55.695	12.6147	2019-09-30	2019-09-30	2019-09-28	2019-09-28	SAMEA5982278	DTU-GE	Centre for Genomic Epidemiology\, National Food Institute\, Technical University of Denmark (DTU)\, Denmark	2019-09-30T17:04:26Z	2019-09-28T07:10:40Z	public	DTU2017-299-PRJ1066-RL-Sewage-210_S5_L001	DTU2017-299-PRJ1066-RL-Sewage-210_S5_L001	Denmark	55.695	12.6147	Centre for Genomic Epidemiology
ERR3563006	WGS	PRJEB34633	SAMEA5982279	CENTRE FOR GENOMIC EPIDEMIOLOGY, NATIONAL FOOD INS	public	ERX3561505	Illumina MiSeq	Illumina MiSeq	unspecified	PAIRED	RANDOM	METAGENOMIC	wastewater metagenome	ILLUMINA	2019-10-02T00:00:00Z	SAMEA5982279	ERP117567	sra	gs,ncbi,s3	gs.US,ncbi.public,s3.us-east-1	1121161447	Denmark	Europe	2017-02-13						55.6083	12.4503	2019-09-30	2019-09-30	2019-09-28	2019-09-28	SAMEA5982279	DTU-GE	Centre for Genomic Epidemiology\, National Food Institute\, Technical University of Denmark (DTU)\, Denmark	2019-09-30T17:04:26Z	2019-09-28T07:10:40Z	public	DTU2017-300-PRJ1066-RA-Sewage-211_S6_L001	DTU2017-300-PRJ1066-RA-Sewage-211_S6_L001	Denmark	55.6083	12.4503	Centre for Genomic Epidemiology
ERR3563007	WGS	PRJEB34633	SAMEA5982280	CENTRE FOR GENOMIC EPIDEMIOLOGY, NATIONAL FOOD INS	public	ERX3561506	Illumina MiSeq	Illumina MiSeq	unspecified	PAIRED	RANDOM	METAGENOMIC	wastewater metagenome	ILLUMINA	2019-10-02T00:00:00Z	SAMEA5982280	ERP117567	sra	gs,ncbi,s3	gs.US,ncbi.public,s3.us-east-1	66034406	Denmark	Europe	2017-02-17						55.6406	12.5056	2019-09-30	2019-09-30	2019-09-28	2019-09-28	SAMEA5982280	DTU-GE	Centre for Genomic Epidemiology\, National Food Institute\, Technical University of Denmark (DTU)\, Denmark	2019-09-30T17:04:26Z	2019-09-28T07:10:40Z	public	DTU2017-540-PRJ1066-RD-Sewage-212_S1_L001	DTU2017-540-PRJ1066-RD-Sewage-212_S1_L001	Denmark	55.6406	12.5056	Centre for Genomic Epidemiology
ERR3563013	WGS	PRJEB34633	SAMEA5982286	CENTRE FOR GENOMIC EPIDEMIOLOGY, NATIONAL FOOD INS	public	ERX3561512	Illumina MiSeq	Illumina MiSeq	unspecified	PAIRED	RANDOM	METAGENOMIC	wastewater metagenome	ILLUMINA	2019-10-02T00:00:00Z	SAMEA5982286	ERP117567	sra	gs,ncbi,s3	gs.US,ncbi.public,s3.us-east-1	1040398334	Denmark	Europe	2017-02-17						55.695	12.6147	2019-09-30	2019-09-30	2019-09-28	2019-09-28	SAMEA5982286	DTU-GE	Centre for Genomic Epidemiology\, National Food Institute\, Technical University of Denmark (DTU)\, Denmark	2019-09-30T17:04:26Z	2019-09-28T07:10:40Z	public	DTU2017-582-PRJ1066-RL-Sewage-218_S1_L001	DTU2017-582-PRJ1066-RL-Sewage-218_S1_L001	Denmark	55.695	12.6147	Centre for Genomic Epidemiology
ERR3563008	WGS	PRJEB34633	SAMEA5982281	CENTRE FOR GENOMIC EPIDEMIOLOGY, NATIONAL FOOD INS	public	ERX3561507	Illumina MiSeq	Illumina MiSeq	unspecified	PAIRED	RANDOM	METAGENOMIC	wastewater metagenome	ILLUMINA	2019-10-02T00:00:00Z	SAMEA5982281	ERP117567	sra	gs,ncbi,s3	gs.US,ncbi.public,s3.us-east-1	80958712	Denmark	Europe	2017-02-22						55.6406	12.5056	2019-09-30	2019-09-30	2019-09-28	2019-09-28	SAMEA5982281	DTU-GE	Centre for Genomic Epidemiology\, National Food Institute\, Technical University of Denmark (DTU)\, Denmark	2019-09-30T17:04:26Z	2019-09-28T07:10:40Z	public	DTU2017-541-PRJ1066-RD-Sewage-213_S2_L001	DTU2017-541-PRJ1066-RD-Sewage-213_S2_L001	Denmark	55.6406	12.5056	Centre for Genomic Epidemiology
ERR3563014	WGS	PRJEB34633	SAMEA5982287	CENTRE FOR GENOMIC EPIDEMIOLOGY, NATIONAL FOOD INS	public	ERX3561513	Illumina MiSeq	Illumina MiSeq	unspecified	PAIRED	RANDOM	METAGENOMIC	wastewater metagenome	ILLUMINA	2019-10-02T00:00:00Z	SAMEA5982287	ERP117567	sra	gs,ncbi,s3	gs.US,ncbi.public,s3.us-east-1	393803892	Denmark	Europe	2017-02-22						55.695	12.6147	2019-09-30	2019-09-30	2019-09-28	2019-09-28	SAMEA5982287	DTU-GE	Centre for Genomic Epidemiology\, National Food Institute\, Technical University of Denmark (DTU)\, Denmark	2019-09-30T17:04:26Z	2019-09-28T07:10:40Z	public	DTU2017-583-PRJ1066-RL-Sewage-219_S2_L001	DTU2017-583-PRJ1066-RL-Sewage-219_S2_L001	Denmark	55.695	12.6147	Centre for Genomic Epidemiology
ERR3563015	WGS	PRJEB34633	SAMEA5982288	CENTRE FOR GENOMIC EPIDEMIOLOGY, NATIONAL FOOD INS	public	ERX3561514	NextSeq 550	Illumina NextSeq	unspecified	PAIRED	RANDOM	METAGENOMIC	wastewater metagenome	ILLUMINA	2019-10-02T00:00:00Z	SAMEA5982288	ERP117567	sra	gs,ncbi,s3	gs.US,ncbi.public,s3.us-east-1	3093961488	Denmark	Europe	2017-02-22						55.695	12.6147	2019-09-30	2019-09-30	2019-09-28	2019-09-28	SAMEA5982288	DTU-GE	Centre for Genomic Epidemiology\, National Food Institute\, Technical University of Denmark (DTU)\, Denmark	2019-09-30T17:04:26Z	2019-09-28T07:10:40Z	public	DTU2019-195-PRJ1066-RL-CPH-Sewage-219	DTU2019-195-PRJ1066-RL-CPH-Sewage-219	Denmark	55.695	12.6147	Centre for Genomic Epidemiology
ERR3563009	WGS	PRJEB34633	SAMEA5982282	CENTRE FOR GENOMIC EPIDEMIOLOGY, NATIONAL FOOD INS	public	ERX3561508	Illumina MiSeq	Illumina MiSeq	unspecified	PAIRED	RANDOM	METAGENOMIC	wastewater metagenome	ILLUMINA	2019-10-02T00:00:00Z	SAMEA5982282	ERP117567	sra	gs,ncbi,s3	gs.US,ncbi.public,s3.us-east-1	104381157	Denmark	Europe	2017-02-28						55.6406	12.5056	2019-09-30	2019-09-30	2019-09-28	2019-09-28	SAMEA5982282	DTU-GE	Centre for Genomic Epidemiology\, National Food Institute\, Technical University of Denmark (DTU)\, Denmark	2019-09-30T17:04:26Z	2019-09-28T07:10:40Z	public	DTU2017-542-PRJ1066-RD-Sewage-214_S3_L001	DTU2017-542-PRJ1066-RD-Sewage-214_S3_L001	Denmark	55.6406	12.5056	Centre for Genomic Epidemiology
ERR3563010	WGS	PRJEB34633	SAMEA5982283	CENTRE FOR GENOMIC EPIDEMIOLOGY, NATIONAL FOOD INS	public	ERX3561509	Illumina MiSeq	Illumina MiSeq	unspecified	PAIRED	RANDOM	METAGENOMIC	wastewater metagenome	ILLUMINA	2019-10-02T00:00:00Z	SAMEA5982283	ERP117567	sra	gs,ncbi,s3	gs.US,ncbi.public,s3.us-east-1	122510849	Denmark	Europe	2017-03-02						55.6406	12.5056	2019-09-30	2019-09-30	2019-09-28	2019-09-28	SAMEA5982283	DTU-GE	Centre for Genomic Epidemiology\, National Food Institute\, Technical University of Denmark (DTU)\, Denmark	2019-09-30T17:04:26Z	2019-09-28T07:10:40Z	public	DTU2017-543-PRJ1066-RD-Sewage-215_S4_L001	DTU2017-543-PRJ1066-RD-Sewage-215_S4_L001	Denmark	55.6406	12.5056	Centre for Genomic Epidemiology
ERR3563016	WGS	PRJEB34633	SAMEA5982289	CENTRE FOR GENOMIC EPIDEMIOLOGY, NATIONAL FOOD INS	public	ERX3561515	Illumina MiSeq	Illumina MiSeq	unspecified	PAIRED	RANDOM	METAGENOMIC	wastewater metagenome	ILLUMINA	2019-10-02T00:00:00Z	SAMEA5982289	ERP117567	sra	gs,ncbi,s3	gs.US,ncbi.public,s3.us-east-1	818599540	Denmark	Europe	2017-03-02						55.695	12.6147	2019-09-30	2019-09-30	2019-09-28	2019-09-28	SAMEA5982289	DTU-GE	Centre for Genomic Epidemiology\, National Food Institute\, Technical University of Denmark (DTU)\, Denmark	2019-09-30T17:04:26Z	2019-09-28T07:10:40Z	public	DTU2017-584-PRJ1066-RL-Sewage-220_S3_L001	DTU2017-584-PRJ1066-RL-Sewage-220_S3_L001	Denmark	55.695	12.6147	Centre for Genomic Epidemiology
ERR3563011	WGS	PRJEB34633	SAMEA5982284	CENTRE FOR GENOMIC EPIDEMIOLOGY, NATIONAL FOOD INS	public	ERX3561510	Illumina MiSeq	Illumina MiSeq	unspecified	PAIRED	RANDOM	METAGENOMIC	wastewater metagenome	ILLUMINA	2019-10-02T00:00:00Z	SAMEA5982284	ERP117567	sra	gs,ncbi,s3	gs.US,ncbi.public,s3.us-east-1	97411973	Denmark	Europe	2017-03-05						55.6406	12.5056	2019-09-30	2019-09-30	2019-09-28	2019-09-28	SAMEA5982284	DTU-GE	Centre for Genomic Epidemiology\, National Food Institute\, Technical University of Denmark (DTU)\, Denmark	2019-09-30T17:04:26Z	2019-09-28T07:10:40Z	public	DTU2017-544-PRJ1066-RD-Sewage-216_S5_L001	DTU2017-544-PRJ1066-RD-Sewage-216_S5_L001	Denmark	55.6406	12.5056	Centre for Genomic Epidemiology
ERR3563012	WGS	PRJEB34633	SAMEA5982285	CENTRE FOR GENOMIC EPIDEMIOLOGY, NATIONAL FOOD INS	public	ERX3561511	Illumina MiSeq	Illumina MiSeq	unspecified	PAIRED	RANDOM	METAGENOMIC	wastewater metagenome	ILLUMINA	2019-10-02T00:00:00Z	SAMEA5982285	ERP117567	sra	gs,ncbi,s3	gs.US,ncbi.public,s3.us-east-1	89911141	Denmark	Europe	2017-03-05						55.6083	12.4503	2019-09-30	2019-09-30	2019-09-28	2019-09-28	SAMEA5982285	DTU-GE	Centre for Genomic Epidemiology\, National Food Institute\, Technical University of Denmark (DTU)\, Denmark	2019-09-30T17:04:26Z	2019-09-28T07:10:40Z	public	DTU2017-545-PRJ1066-RA-Sewage-217_S6_L001	DTU2017-545-PRJ1066-RA-Sewage-217_S6_L001	Denmark	55.6083	12.4503	Centre for Genomic Epidemiology
ERR3563017	WGS	PRJEB34633	SAMEA5982290	CENTRE FOR GENOMIC EPIDEMIOLOGY, NATIONAL FOOD INS	public	ERX3561516	Illumina MiSeq	Illumina MiSeq	unspecified	PAIRED	RANDOM	METAGENOMIC	wastewater metagenome	ILLUMINA	2019-10-02T00:00:00Z	SAMEA5982290	ERP117567	sra	gs,ncbi,s3	gs.US,ncbi.public,s3.us-east-1	1557295587	Denmark	Europe	2017-03-05						55.695	12.6147	2019-09-30	2019-09-30	2019-09-28	2019-09-28	SAMEA5982290	DTU-GE	Centre for Genomic Epidemiology\, National Food Institute\, Technical University of Denmark (DTU)\, Denmark	2019-09-30T17:04:26Z	2019-09-28T07:10:40Z	public	DTU2017-585-PRJ1066-RL-Sewage-221_S4_L001	DTU2017-585-PRJ1066-RL-Sewage-221_S4_L001	Denmark	55.695	12.6147	Centre for Genomic Epidemiology
ERR3563034	WGS	PRJEB34633	SAMEA5982307	CENTRE FOR GENOMIC EPIDEMIOLOGY, NATIONAL FOOD INS	public	ERX3561533	NextSeq 550	Illumina NextSeq	unspecified	PAIRED	RANDOM	METAGENOMIC	wastewater metagenome	ILLUMINA	2019-10-02T00:00:00Z	SAMEA5982307	ERP117567	sra	gs,ncbi,s3	gs.US,ncbi.public,s3.us-east-1	4671147261	Denmark	Europe	2017-03-06						55.6083	12.4503	2019-09-30	2019-09-30	2019-09-28	2019-09-28	SAMEA5982307	DTU-GE	Centre for Genomic Epidemiology\, National Food Institute\, Technical University of Denmark (DTU)\, Denmark	2019-09-30T17:04:26Z	2019-09-28T07:10:41Z	public	DTU2019-207-PRJ1066-RA-CPH-Sewage-238	DTU2019-207-PRJ1066-RA-CPH-Sewage-238	Denmark	55.6083	12.4503	Centre for Genomic Epidemiology
ERR3563018	WGS	PRJEB34633	SAMEA5982291	CENTRE FOR GENOMIC EPIDEMIOLOGY, NATIONAL FOOD INS	public	ERX3561517	NextSeq 550	Illumina NextSeq	unspecified	PAIRED	RANDOM	METAGENOMIC	wastewater metagenome	ILLUMINA	2019-10-02T00:00:00Z	SAMEA5982291	ERP117567	sra	gs,ncbi,s3	gs.US,ncbi.public,s3.us-east-1	2138186516	Denmark	Europe	2017-03-10						55.6406	12.5056	2019-09-30	2019-09-30	2019-09-28	2019-09-28	SAMEA5982291	DTU-GE	Centre for Genomic Epidemiology\, National Food Institute\, Technical University of Denmark (DTU)\, Denmark	2019-09-30T17:04:26Z	2019-09-28T07:10:40Z	public	DTU2019-196-PRJ1066-RD-CPH-Sewage-222	DTU2019-196-PRJ1066-RD-CPH-Sewage-222	Denmark	55.6406	12.5056	Centre for Genomic Epidemiology
ERR3563026	WGS	PRJEB34633	SAMEA5982299	CENTRE FOR GENOMIC EPIDEMIOLOGY, NATIONAL FOOD INS	public	ERX3561525	NextSeq 550	Illumina NextSeq	unspecified	PAIRED	RANDOM	METAGENOMIC	wastewater metagenome	ILLUMINA	2019-10-02T00:00:00Z	SAMEA5982299	ERP117567	sra	gs,ncbi,s3	gs.US,ncbi.public,s3.us-east-1	2021797770	Denmark	Europe	2017-03-10						55.695	12.6147	2019-09-30	2019-09-30	2019-09-28	2019-09-28	SAMEA5982299	DTU-GE	Centre for Genomic Epidemiology\, National Food Institute\, Technical University of Denmark (DTU)\, Denmark	2019-09-30T17:04:26Z	2019-09-28T07:10:40Z	public	DTU2019-200-PRJ1066-RL-CPH-Sewage-228	DTU2019-200-PRJ1066-RL-CPH-Sewage-228	Denmark	55.695	12.6147	Centre for Genomic Epidemiology
ERR3563019	WGS	PRJEB34633	SAMEA5982292	CENTRE FOR GENOMIC EPIDEMIOLOGY, NATIONAL FOOD INS	public	ERX3561518	NextSeq 550	Illumina NextSeq	unspecified	PAIRED	RANDOM	METAGENOMIC	wastewater metagenome	ILLUMINA	2019-10-02T00:00:00Z	SAMEA5982292	ERP117567	sra	gs,ncbi,s3	gs.US,ncbi.public,s3.us-east-1	2076080642	Denmark	Europe	2017-03-16						55.6406	12.5056	2019-09-30	2019-09-30	2019-09-28	2019-09-28	SAMEA5982292	DTU-GE	Centre for Genomic Epidemiology\, National Food Institute\, Technical University of Denmark (DTU)\, Denmark	2019-09-30T17:04:26Z	2019-09-28T07:10:40Z	public	DTU2018-97-PRJ1066-CPH-Sewage-223	DTU2018-97-PRJ1066-CPH-Sewage-223	Denmark	55.6406	12.5056	Centre for Genomic Epidemiology
ERR3563020	WGS	PRJEB34633	SAMEA5982293	CENTRE FOR GENOMIC EPIDEMIOLOGY, NATIONAL FOOD INS	public	ERX3561519	NextSeq 550	Illumina NextSeq	unspecified	PAIRED	RANDOM	METAGENOMIC	wastewater metagenome	ILLUMINA	2019-10-02T00:00:00Z	SAMEA5982293	ERP117567	sra	gs,ncbi,s3	gs.US,ncbi.public,s3.us-east-1	2302832798	Denmark	Europe	2017-03-16						55.6083	12.4503	2019-09-30	2019-09-30	2019-09-28	2019-09-28	SAMEA5982293	DTU-GE	Centre for Genomic Epidemiology\, National Food Institute\, Technical University of Denmark (DTU)\, Denmark	2019-09-30T17:04:26Z	2019-09-28T07:10:40Z	public	DTU2018-98-PRJ1066-CPH-Sewage-224	DTU2018-98-PRJ1066-CPH-Sewage-224	Denmark	55.6083	12.4503	Centre for Genomic Epidemiology
ERR3563021	WGS	PRJEB34633	SAMEA5982294	CENTRE FOR GENOMIC EPIDEMIOLOGY, NATIONAL FOOD INS	public	ERX3561520	NextSeq 550	Illumina NextSeq	unspecified	PAIRED	RANDOM	METAGENOMIC	wastewater metagenome	ILLUMINA	2019-10-02T00:00:00Z	SAMEA5982294	ERP117567	sra	gs,ncbi,s3	gs.US,ncbi.public,s3.us-east-1	2837935648	Denmark	Europe	2017-03-16						55.6083	12.4503	2019-09-30	2019-09-30	2019-09-28	2019-09-28	SAMEA5982294	DTU-GE	Centre for Genomic Epidemiology\, National Food Institute\, Technical University of Denmark (DTU)\, Denmark	2019-09-30T17:04:26Z	2019-09-28T07:10:40Z	public	DTU2019-197-PRJ1066-RA-CPH-Sewage-224	DTU2019-197-PRJ1066-RA-CPH-Sewage-224	Denmark	55.6083	12.4503	Centre for Genomic Epidemiology
ERR3563022	WGS	PRJEB34633	SAMEA5982295	CENTRE FOR GENOMIC EPIDEMIOLOGY, NATIONAL FOOD INS	public	ERX3561521	NextSeq 550	Illumina NextSeq	unspecified	PAIRED	RANDOM	METAGENOMIC	wastewater metagenome	ILLUMINA	2019-10-02T00:00:00Z	SAMEA5982295	ERP117567	sra	gs,ncbi,s3	gs.US,ncbi.public,s3.us-east-1	1654224254	Denmark	Europe	2017-03-21						55.6406	12.5056	2019-09-30	2019-09-30	2019-09-28	2019-09-28	SAMEA5982295	DTU-GE	Centre for Genomic Epidemiology\, National Food Institute\, Technical University of Denmark (DTU)\, Denmark	2019-09-30T17:04:26Z	2019-09-28T07:10:40Z	public	DTU2018-99-PRJ1066-CPH-Sewage-225	DTU2018-99-PRJ1066-CPH-Sewage-225	Denmark	55.6406	12.5056	Centre for Genomic Epidemiology
ERR3563023	WGS	PRJEB34633	SAMEA5982296	CENTRE FOR GENOMIC EPIDEMIOLOGY, NATIONAL FOOD INS	public	ERX3561522	NextSeq 550	Illumina NextSeq	unspecified	PAIRED	RANDOM	METAGENOMIC	wastewater metagenome	ILLUMINA	2019-10-02T00:00:00Z	SAMEA5982296	ERP117567	sra	gs,ncbi,s3	gs.US,ncbi.public,s3.us-east-1	2147577548	Denmark	Europe	2017-03-21						55.6406	12.5056	2019-09-30	2019-09-30	2019-09-28	2019-09-28	SAMEA5982296	DTU-GE	Centre for Genomic Epidemiology\, National Food Institute\, Technical University of Denmark (DTU)\, Denmark	2019-09-30T17:04:26Z	2019-09-28T07:10:40Z	public	DTU2019-198-PRJ1066-RD-CPH-Sewage-225	DTU2019-198-PRJ1066-RD-CPH-Sewage-225	Denmark	55.6406	12.5056	Centre for Genomic Epidemiology
ERR3563024	WGS	PRJEB34633	SAMEA5982297	CENTRE FOR GENOMIC EPIDEMIOLOGY, NATIONAL FOOD INS	public	ERX3561523	NextSeq 550	Illumina NextSeq	unspecified	PAIRED	RANDOM	METAGENOMIC	wastewater metagenome	ILLUMINA	2019-10-02T00:00:00Z	SAMEA5982297	ERP117567	sra	gs,ncbi,s3	gs.US,ncbi.public,s3.us-east-1	2514454349	Denmark	Europe	2017-03-27						55.695	12.6147	2019-09-30	2019-09-30	2019-09-28	2019-09-28	SAMEA5982297	DTU-GE	Centre for Genomic Epidemiology\, National Food Institute\, Technical University of Denmark (DTU)\, Denmark	2019-09-30T17:04:26Z	2019-09-28T07:10:40Z	public	DTU2018-101-PRJ1066-CPH-Sewage-227	DTU2018-101-PRJ1066-CPH-Sewage-227	Denmark	55.695	12.6147	Centre for Genomic Epidemiology
ERR3563025	WGS	PRJEB34633	SAMEA5982298	CENTRE FOR GENOMIC EPIDEMIOLOGY, NATIONAL FOOD INS	public	ERX3561524	NextSeq 550	Illumina NextSeq	unspecified	PAIRED	RANDOM	METAGENOMIC	wastewater metagenome	ILLUMINA	2019-10-02T00:00:00Z	SAMEA5982298	ERP117567	sra	gs,ncbi,s3	gs.US,ncbi.public,s3.us-east-1	2774594851	Denmark	Europe	2017-03-27						55.695	12.6147	2019-09-30	2019-09-30	2019-09-28	2019-09-28	SAMEA5982298	DTU-GE	Centre for Genomic Epidemiology\, National Food Institute\, Technical University of Denmark (DTU)\, Denmark	2019-09-30T17:04:26Z	2019-09-28T07:10:40Z	public	DTU2019-199-PRJ1066-RL-CPH-Sewage-227	DTU2019-199-PRJ1066-RL-CPH-Sewage-227	Denmark	55.695	12.6147	Centre for Genomic Epidemiology
ERR3563036	WGS	PRJEB34633	SAMEA5982309	CENTRE FOR GENOMIC EPIDEMIOLOGY, NATIONAL FOOD INS	public	ERX3561535	NextSeq 550	Illumina NextSeq	unspecified	PAIRED	RANDOM	METAGENOMIC	wastewater metagenome	ILLUMINA	2019-10-02T00:00:00Z	SAMEA5982309	ERP117567	sra	gs,ncbi,s3	gs.US,ncbi.public,s3.us-east-1	3292986029	Denmark	Europe	2017-04-05						55.6406	12.5056	2019-09-30	2019-09-30	2019-09-28	2019-09-28	SAMEA5982309	DTU-GE	Centre for Genomic Epidemiology\, National Food Institute\, Technical University of Denmark (DTU)\, Denmark	2019-09-30T17:04:26Z	2019-09-28T07:10:41Z	public	DTU2018-1625-PRJ1066-RD-CPH-Sewage-240	DTU2018-1625-PRJ1066-RD-CPH-Sewage-240	Denmark	55.6406	12.5056	Centre for Genomic Epidemiology
ERR3563040	WGS	PRJEB34633	SAMEA5982313	CENTRE FOR GENOMIC EPIDEMIOLOGY, NATIONAL FOOD INS	public	ERX3561539	NextSeq 550	Illumina NextSeq	unspecified	PAIRED	RANDOM	METAGENOMIC	wastewater metagenome	ILLUMINA	2019-10-02T00:00:00Z	SAMEA5982313	ERP117567	sra	gs,ncbi,s3	gs.US,ncbi.public,s3.us-east-1	2955801326	Denmark	Europe	2017-04-07						55.6406	12.5056	2019-09-30	2019-09-30	2019-09-28	2019-09-28	SAMEA5982313	DTU-GE	Centre for Genomic Epidemiology\, National Food Institute\, Technical University of Denmark (DTU)\, Denmark	2019-09-30T17:04:26Z	2019-09-28T07:10:41Z	public	DTU2019-211-PRJ1066-RD-CPH-Sewage-246	DTU2019-211-PRJ1066-RD-CPH-Sewage-246	Denmark	55.6406	12.5056	Centre for Genomic Epidemiology
ERR3563030	WGS	PRJEB34633	SAMEA5982303	CENTRE FOR GENOMIC EPIDEMIOLOGY, NATIONAL FOOD INS	public	ERX3561529	NextSeq 550	Illumina NextSeq	unspecified	PAIRED	RANDOM	METAGENOMIC	wastewater metagenome	ILLUMINA	2019-10-02T00:00:00Z	SAMEA5982303	ERP117567	sra	gs,ncbi,s3	gs.US,ncbi.public,s3.us-east-1	3029973869	Denmark	Europe	2017-04-11						55.695	12.6147	2019-09-30	2019-09-30	2019-09-28	2019-09-28	SAMEA5982303	DTU-GE	Centre for Genomic Epidemiology\, National Food Institute\, Technical University of Denmark (DTU)\, Denmark	2019-09-30T17:04:26Z	2019-09-28T07:10:40Z	public	DTU2018-1619-PRJ1066-RL-CPH-ReSewage-234	DTU2018-1619-PRJ1066-RL-CPH-ReSewage-234	Denmark	55.695	12.6147	Centre for Genomic Epidemiology
ERR3563037	WGS	PRJEB34633	SAMEA5982310	CENTRE FOR GENOMIC EPIDEMIOLOGY, NATIONAL FOOD INS	public	ERX3561536	NextSeq 550	Illumina NextSeq	unspecified	PAIRED	RANDOM	METAGENOMIC	wastewater metagenome	ILLUMINA	2019-10-02T00:00:00Z	SAMEA5982310	ERP117567	sra	gs,ncbi,s3	gs.US,ncbi.public,s3.us-east-1	3306050015	Denmark	Europe	2017-04-11						55.6083	12.4503	2019-09-30	2019-09-30	2019-09-28	2019-09-28	SAMEA5982310	DTU-GE	Centre for Genomic Epidemiology\, National Food Institute\, Technical University of Denmark (DTU)\, Denmark	2019-09-30T17:04:26Z	2019-09-28T07:10:41Z	public	DTU2019-208-PRJ1066-RA-CPH-Sewage-241	DTU2019-208-PRJ1066-RA-CPH-Sewage-241	Denmark	55.6083	12.4503	Centre for Genomic Epidemiology
ERR3563029	WGS	PRJEB34633	SAMEA5982302	CENTRE FOR GENOMIC EPIDEMIOLOGY, NATIONAL FOOD INS	public	ERX3561528	NextSeq 550	Illumina NextSeq	unspecified	PAIRED	RANDOM	METAGENOMIC	wastewater metagenome	ILLUMINA	2019-10-02T00:00:00Z	SAMEA5982302	ERP117567	sra	gs,ncbi,s3	gs.US,ncbi.public,s3.us-east-1	3526237812	Denmark	Europe	2017-04-11						55.6406	12.5056	2019-09-30	2019-09-30	2019-09-28	2019-09-28	SAMEA5982302	DTU-GE	Centre for Genomic Epidemiology\, National Food Institute\, Technical University of Denmark (DTU)\, Denmark	2019-09-30T17:04:26Z	2019-09-28T07:10:40Z	public	DTU2019-203-PRJ1066-RD-CPH-Sewage-233	DTU2019-203-PRJ1066-RD-CPH-Sewage-233	Denmark	55.6406	12.5056	Centre for Genomic Epidemiology
ERR3563031	WGS	PRJEB34633	SAMEA5982304	CENTRE FOR GENOMIC EPIDEMIOLOGY, NATIONAL FOOD INS	public	ERX3561530	NextSeq 550	Illumina NextSeq	unspecified	PAIRED	RANDOM	METAGENOMIC	wastewater metagenome	ILLUMINA	2019-10-02T00:00:00Z	SAMEA5982304	ERP117567	sra	gs,ncbi,s3	gs.US,ncbi.public,s3.us-east-1	4506891708	Denmark	Europe	2017-04-18						55.6083	12.4503	2019-09-30	2019-09-30	2019-09-28	2019-09-28	SAMEA5982304	DTU-GE	Centre for Genomic Epidemiology\, National Food Institute\, Technical University of Denmark (DTU)\, Denmark	2019-09-30T17:04:26Z	2019-09-28T07:10:41Z	public	DTU2019-204-PRJ1066-RA-CPH-Sewage-235	DTU2019-204-PRJ1066-RA-CPH-Sewage-235	Denmark	55.6083	12.4503	Centre for Genomic Epidemiology
ERR3563038	WGS	PRJEB34633	SAMEA5982311	CENTRE FOR GENOMIC EPIDEMIOLOGY, NATIONAL FOOD INS	public	ERX3561537	NextSeq 550	Illumina NextSeq	unspecified	PAIRED	RANDOM	METAGENOMIC	wastewater metagenome	ILLUMINA	2019-10-02T00:00:00Z	SAMEA5982311	ERP117567	sra	gs,ncbi,s3	gs.US,ncbi.public,s3.us-east-1	2547123891	Denmark	Europe	2017-04-20						55.695	12.6147	2019-09-30	2019-09-30	2019-09-28	2019-09-28	SAMEA5982311	DTU-GE	Centre for Genomic Epidemiology\, National Food Institute\, Technical University of Denmark (DTU)\, Denmark	2019-09-30T17:04:26Z	2019-09-28T07:10:41Z	public	DTU2019-209-PRJ1066-RL-CPH-Sewage-243	DTU2019-209-PRJ1066-RL-CPH-Sewage-243	Denmark	55.695	12.6147	Centre for Genomic Epidemiology
ERR3563041	WGS	PRJEB34633	SAMEA5982314	CENTRE FOR GENOMIC EPIDEMIOLOGY, NATIONAL FOOD INS	public	ERX3561540	NextSeq 550	Illumina NextSeq	unspecified	PAIRED	RANDOM	METAGENOMIC	wastewater metagenome	ILLUMINA	2019-10-02T00:00:00Z	SAMEA5982314	ERP117567	sra	gs,ncbi,s3	gs.US,ncbi.public,s3.us-east-1	4780339977	Denmark	Europe	2017-04-20						55.6406	12.5056	2019-09-30	2019-09-30	2019-09-28	2019-09-28	SAMEA5982314	DTU-GE	Centre for Genomic Epidemiology\, National Food Institute\, Technical University of Denmark (DTU)\, Denmark	2019-09-30T17:04:26Z	2019-09-28T07:10:41Z	public	DTU2019-212-PRJ1066-RD-CPH-Sewage-248	DTU2019-212-PRJ1066-RD-CPH-Sewage-248	Denmark	55.6406	12.5056	Centre for Genomic Epidemiology
ERR3563032	WGS	PRJEB34633	SAMEA5982305	CENTRE FOR GENOMIC EPIDEMIOLOGY, NATIONAL FOOD INS	public	ERX3561531	NextSeq 550	Illumina NextSeq	unspecified	PAIRED	RANDOM	METAGENOMIC	wastewater metagenome	ILLUMINA	2019-10-02T00:00:00Z	SAMEA5982305	ERP117567	sra	gs,ncbi,s3	gs.US,ncbi.public,s3.us-east-1	4241583739	Denmark	Europe	2017-04-24						55.6083	12.4503	2019-09-30	2019-09-30	2019-09-28	2019-09-28	SAMEA5982305	DTU-GE	Centre for Genomic Epidemiology\, National Food Institute\, Technical University of Denmark (DTU)\, Denmark	2019-09-30T17:04:26Z	2019-09-28T07:10:41Z	public	DTU2019-205-PRJ1066-RA-CPH-Sewage-236	DTU2019-205-PRJ1066-RA-CPH-Sewage-236	Denmark	55.6083	12.4503	Centre for Genomic Epidemiology
ERR3563039	WGS	PRJEB34633	SAMEA5982312	CENTRE FOR GENOMIC EPIDEMIOLOGY, NATIONAL FOOD INS	public	ERX3561538	NextSeq 550	Illumina NextSeq	unspecified	PAIRED	RANDOM	METAGENOMIC	wastewater metagenome	ILLUMINA	2019-10-02T00:00:00Z	SAMEA5982312	ERP117567	sra	gs,ncbi,s3	gs.US,ncbi.public,s3.us-east-1	3898805037	Denmark	Europe	2017-04-24						55.6406	12.5056	2019-09-30	2019-09-30	2019-09-28	2019-09-28	SAMEA5982312	DTU-GE	Centre for Genomic Epidemiology\, National Food Institute\, Technical University of Denmark (DTU)\, Denmark	2019-09-30T17:04:26Z	2019-09-28T07:10:41Z	public	DTU2019-210-PRJ1066-RD-CPH-Sewage-245	DTU2019-210-PRJ1066-RD-CPH-Sewage-245	Denmark	55.6406	12.5056	Centre for Genomic Epidemiology
ERR3563042	WGS	PRJEB34633	SAMEA5982315	CENTRE FOR GENOMIC EPIDEMIOLOGY, NATIONAL FOOD INS	public	ERX3561541	NextSeq 550	Illumina NextSeq	unspecified	PAIRED	RANDOM	METAGENOMIC	wastewater metagenome	ILLUMINA	2019-10-02T00:00:00Z	SAMEA5982315	ERP117567	sra	gs,ncbi,s3	gs.US,ncbi.public,s3.us-east-1	2836156558	Denmark	Europe	2017-05-04						55.6406	12.5056	2019-09-30	2019-09-30	2019-09-28	2019-09-28	SAMEA5982315	DTU-GE	Centre for Genomic Epidemiology\, National Food Institute\, Technical University of Denmark (DTU)\, Denmark	2019-09-30T17:04:26Z	2019-09-28T07:10:41Z	public	DTU2018-1605-PRJ1066-RD-CPH-Sewage-249	DTU2018-1605-PRJ1066-RD-CPH-Sewage-249	Denmark	55.6406	12.5056	Centre for Genomic Epidemiology
ERR3563043	WGS	PRJEB34633	SAMEA5982316	CENTRE FOR GENOMIC EPIDEMIOLOGY, NATIONAL FOOD INS	public	ERX3561542	NextSeq 550	Illumina NextSeq	unspecified	PAIRED	RANDOM	METAGENOMIC	wastewater metagenome	ILLUMINA	2019-10-02T00:00:00Z	SAMEA5982316	ERP117567	sra	gs,ncbi,s3	gs.US,ncbi.public,s3.us-east-1	2369156841	Denmark	Europe	2017-05-06						55.6406	12.5056	2019-09-30	2019-09-30	2019-09-28	2019-09-28	SAMEA5982316	DTU-GE	Centre for Genomic Epidemiology\, National Food Institute\, Technical University of Denmark (DTU)\, Denmark	2019-09-30T17:04:26Z	2019-09-28T07:10:41Z	public	DTU2018-1606-PRJ1066-RD-CPH-Sewage-250	DTU2018-1606-PRJ1066-RD-CPH-Sewage-250	Denmark	55.6406	12.5056	Centre for Genomic Epidemiology
ERR3563044	WGS	PRJEB34633	SAMEA5982317	CENTRE FOR GENOMIC EPIDEMIOLOGY, NATIONAL FOOD INS	public	ERX3561543	NextSeq 550	Illumina NextSeq	unspecified	PAIRED	RANDOM	METAGENOMIC	wastewater metagenome	ILLUMINA	2019-10-02T00:00:00Z	SAMEA5982317	ERP117567	sra	gs,ncbi,s3	gs.US,ncbi.public,s3.us-east-1	3376204031	Denmark	Europe	2017-05-09						55.6406	12.5056	2019-09-30	2019-09-30	2019-09-28	2019-09-28	SAMEA5982317	DTU-GE	Centre for Genomic Epidemiology\, National Food Institute\, Technical University of Denmark (DTU)\, Denmark	2019-09-30T17:04:26Z	2019-09-28T07:10:41Z	public	DTU2018-1607-PRJ1066-RD-CPH-Sewage-251	DTU2018-1607-PRJ1066-RD-CPH-Sewage-251	Denmark	55.6406	12.5056	Centre for Genomic Epidemiology
ERR3563045	WGS	PRJEB34633	SAMEA5982318	CENTRE FOR GENOMIC EPIDEMIOLOGY, NATIONAL FOOD INS	public	ERX3561544	NextSeq 550	Illumina NextSeq	unspecified	PAIRED	RANDOM	METAGENOMIC	wastewater metagenome	ILLUMINA	2019-10-02T00:00:00Z	SAMEA5982318	ERP117567	sra	gs,ncbi,s3	gs.US,ncbi.public,s3.us-east-1	2352886091	Denmark	Europe	2017-05-09						55.695	12.6147	2019-09-30	2019-09-30	2019-09-28	2019-09-28	SAMEA5982318	DTU-GE	Centre for Genomic Epidemiology\, National Food Institute\, Technical University of Denmark (DTU)\, Denmark	2019-09-30T17:04:26Z	2019-09-28T07:10:41Z	public	DTU2018-100-PRJ1066-RL-CPH-Sewage-252	DTU2018-100-PRJ1066-RL-CPH-Sewage-252	Denmark	55.695	12.6147	Centre for Genomic Epidemiology
ERR3563027	WGS	PRJEB34633	SAMEA5982300	CENTRE FOR GENOMIC EPIDEMIOLOGY, NATIONAL FOOD INS	public	ERX3561526	NextSeq 550	Illumina NextSeq	unspecified	PAIRED	RANDOM	METAGENOMIC	wastewater metagenome	ILLUMINA	2019-10-02T00:00:00Z	SAMEA5982300	ERP117567	sra	gs,ncbi,s3	gs.US,ncbi.public,s3.us-east-1	3927317588	Denmark	Europe	2017-05-13						55.6406	12.5056	2019-09-30	2019-09-30	2019-09-28	2019-09-28	SAMEA5982300	DTU-GE	Centre for Genomic Epidemiology\, National Food Institute\, Technical University of Denmark (DTU)\, Denmark	2019-09-30T17:04:26Z	2019-09-28T07:10:40Z	public	DTU2019-201-PRJ1066-RD-CPH-Sewage-231	DTU2019-201-PRJ1066-RD-CPH-Sewage-231	Denmark	55.6406	12.5056	Centre for Genomic Epidemiology
ERR3563035	WGS	PRJEB34633	SAMEA5982308	CENTRE FOR GENOMIC EPIDEMIOLOGY, NATIONAL FOOD INS	public	ERX3561534	NextSeq 550	Illumina NextSeq	unspecified	PAIRED	RANDOM	METAGENOMIC	wastewater metagenome	ILLUMINA	2019-10-02T00:00:00Z	SAMEA5982308	ERP117567	sra	gs,ncbi,s3	gs.US,ncbi.public,s3.us-east-1	2633620829	Denmark	Europe	2017-05-15						55.695	12.6147	2019-09-30	2019-09-30	2019-09-28	2019-09-28	SAMEA5982308	DTU-GE	Centre for Genomic Epidemiology\, National Food Institute\, Technical University of Denmark (DTU)\, Denmark	2019-09-30T17:04:26Z	2019-09-28T07:10:41Z	public	DTU2018-96-PRJ1066-RL-CPH-Sewage-239	DTU2018-96-PRJ1066-RL-CPH-Sewage-239	Denmark	55.695	12.6147	Centre for Genomic Epidemiology
ERR3563046	WGS	PRJEB34633	SAMEA5982319	CENTRE FOR GENOMIC EPIDEMIOLOGY, NATIONAL FOOD INS	public	ERX3561545	NextSeq 550	Illumina NextSeq	unspecified	PAIRED	RANDOM	METAGENOMIC	wastewater metagenome	ILLUMINA	2019-10-02T00:00:00Z	SAMEA5982319	ERP117567	sra	gs,ncbi,s3	gs.US,ncbi.public,s3.us-east-1	3293132962	Denmark	Europe	2017-05-16						55.6083	12.4503	2019-09-30	2019-09-30	2019-09-28	2019-09-28	SAMEA5982319	DTU-GE	Centre for Genomic Epidemiology\, National Food Institute\, Technical University of Denmark (DTU)\, Denmark	2019-09-30T17:04:26Z	2019-09-28T07:10:41Z	public	DTU2018-1601-PRJ1066-RA-CPH-Sewage-254	DTU2018-1601-PRJ1066-RA-CPH-Sewage-254	Denmark	55.6083	12.4503	Centre for Genomic Epidemiology
ERR3563028	WGS	PRJEB34633	SAMEA5982301	CENTRE FOR GENOMIC EPIDEMIOLOGY, NATIONAL FOOD INS	public	ERX3561527	NextSeq 550	Illumina NextSeq	unspecified	PAIRED	RANDOM	METAGENOMIC	wastewater metagenome	ILLUMINA	2019-10-02T00:00:00Z	SAMEA5982301	ERP117567	sra	gs,ncbi,s3	gs.US,ncbi.public,s3.us-east-1	2617077538	Denmark	Europe	2017-05-22						55.695	12.6147	2019-09-30	2019-09-30	2019-09-28	2019-09-28	SAMEA5982301	DTU-GE	Centre for Genomic Epidemiology\, National Food Institute\, Technical University of Denmark (DTU)\, Denmark	2019-09-30T17:04:26Z	2019-09-28T07:10:40Z	public	DTU2019-202-PRJ1066-RL-CPH-Sewage-232	DTU2019-202-PRJ1066-RL-CPH-Sewage-232	Denmark	55.695	12.6147	Centre for Genomic Epidemiology
ERR3563033	WGS	PRJEB34633	SAMEA5982306	CENTRE FOR GENOMIC EPIDEMIOLOGY, NATIONAL FOOD INS	public	ERX3561532	NextSeq 550	Illumina NextSeq	unspecified	PAIRED	RANDOM	METAGENOMIC	wastewater metagenome	ILLUMINA	2019-10-02T00:00:00Z	SAMEA5982306	ERP117567	sra	gs,ncbi,s3	gs.US,ncbi.public,s3.us-east-1	3405129664	Denmark	Europe	2017-06-05						55.6406	12.5056	2019-09-30	2019-09-30	2019-09-28	2019-09-28	SAMEA5982306	DTU-GE	Centre for Genomic Epidemiology\, National Food Institute\, Technical University of Denmark (DTU)\, Denmark	2019-09-30T17:04:26Z	2019-09-28T07:10:41Z	public	DTU2019-206-PRJ1066-RD-CPH-Sewage-237	DTU2019-206-PRJ1066-RD-CPH-Sewage-237	Denmark	55.6406	12.5056	Centre for Genomic Epidemiology
ERR3563047	WGS	PRJEB34633	SAMEA5982320	CENTRE FOR GENOMIC EPIDEMIOLOGY, NATIONAL FOOD INS	public	ERX3561546	NextSeq 550	Illumina NextSeq	unspecified	PAIRED	RANDOM	METAGENOMIC	wastewater metagenome	ILLUMINA	2019-10-02T00:00:00Z	SAMEA5982320	ERP117567	sra	gs,ncbi,s3	gs.US,ncbi.public,s3.us-east-1	2650550329	Denmark	Europe	2017-06-11						55.6406	12.5056	2019-09-30	2019-09-30	2019-09-28	2019-09-28	SAMEA5982320	DTU-GE	Centre for Genomic Epidemiology\, National Food Institute\, Technical University of Denmark (DTU)\, Denmark	2019-09-30T17:04:26Z	2019-09-28T07:10:41Z	public	DTU2019-555-PRJ1066-RD-CPH-Sewage-265	DTU2019-555-PRJ1066-RD-CPH-Sewage-265	Denmark	55.6406	12.5056	Centre for Genomic Epidemiology
ERR2683190	WGS	PRJEB27621	SAMEA4777447	CENTRE FOR GENOMIC EPIDEMIOLOGY, NATIONAL FOOD INS	public	ERX2697804	Illumina NovaSeq 6000		unspecified	PAIRED	RANDOM	METAGENOMIC	wastewater metagenome	ILLUMINA	2020-07-02T00:00:00Z	SAMEA4777447	ERP109726	sra	gs,ncbi,s3	gs.US,ncbi.public,s3.us-east-1	4500438236	Denmark	Europe	2017-06-16				Denmark		66.9425	-53.6531	2020-07-01	2020-07-01	2018-11-16	2018-07-04	SAMEA4777447	DTU-GE	Centre for Genomic Epidemiology\, National Food Institute\, Technical University of Denmark (DTU)\, Denmark	2020-07-01T04:04:01Z	2018-07-04T17:53:42Z	public	DTU2017_MG_18_GL_SI	DTU2017_MG_18_GL_SI		66.9425	-53.6531	Centre for Genomic Epidemiology
ERR3563048	WGS	PRJEB34633	SAMEA5982321	CENTRE FOR GENOMIC EPIDEMIOLOGY, NATIONAL FOOD INS	public	ERX3561547	NextSeq 550	Illumina NextSeq	unspecified	PAIRED	RANDOM	METAGENOMIC	wastewater metagenome	ILLUMINA	2019-10-02T00:00:00Z	SAMEA5982321	ERP117567	sra	gs,ncbi,s3	gs.US,ncbi.public,s3.us-east-1	2610175480	Denmark	Europe	2017-07-01						55.6406	12.5056	2019-09-30	2019-09-30	2019-09-28	2019-09-28	SAMEA5982321	DTU-GE	Centre for Genomic Epidemiology\, National Food Institute\, Technical University of Denmark (DTU)\, Denmark	2019-09-30T17:04:26Z	2019-09-28T07:10:41Z	public	DTU2018-1626-PRJ1066-RD-CPH-Sewage-271	DTU2018-1626-PRJ1066-RD-CPH-Sewage-271	Denmark	55.6406	12.5056	Centre for Genomic Epidemiology
ERR3563049	WGS	PRJEB34633	SAMEA5982322	CENTRE FOR GENOMIC EPIDEMIOLOGY, NATIONAL FOOD INS	public	ERX3561548	NextSeq 550	Illumina NextSeq	unspecified	PAIRED	RANDOM	METAGENOMIC	wastewater metagenome	ILLUMINA	2019-10-02T00:00:00Z	SAMEA5982322	ERP117567	sra	gs,ncbi,s3	gs.US,ncbi.public,s3.us-east-1	2014965475	Denmark	Europe	2017-07-05						55.6083	12.4503	2019-09-30	2019-09-30	2019-09-28	2019-09-28	SAMEA5982322	DTU-GE	Centre for Genomic Epidemiology\, National Food Institute\, Technical University of Denmark (DTU)\, Denmark	2019-09-30T17:04:26Z	2019-09-28T07:10:41Z	public	DTU2018-1614-PRJ1066-RA-CPH-ReSewage-274	DTU2018-1614-PRJ1066-RA-CPH-ReSewage-274	Denmark	55.6083	12.4503	Centre for Genomic Epidemiology
ERR3563050	WGS	PRJEB34633	SAMEA5982323	CENTRE FOR GENOMIC EPIDEMIOLOGY, NATIONAL FOOD INS	public	ERX3561549	NextSeq 550	Illumina NextSeq	unspecified	PAIRED	RANDOM	METAGENOMIC	wastewater metagenome	ILLUMINA	2019-10-02T00:00:00Z	SAMEA5982323	ERP117567	sra	gs,ncbi,s3	gs.US,ncbi.public,s3.us-east-1	2786609905	Denmark	Europe	2017-07-05						55.695	12.6147	2019-09-30	2019-09-30	2019-09-28	2019-09-28	SAMEA5982323	DTU-GE	Centre for Genomic Epidemiology\, National Food Institute\, Technical University of Denmark (DTU)\, Denmark	2019-09-30T17:04:26Z	2019-09-28T07:10:41Z	public	DTU2018-1620-PRJ1066-RL-CPH-Sewage-275	DTU2018-1620-PRJ1066-RL-CPH-Sewage-275	Denmark	55.695	12.6147	Centre for Genomic Epidemiology
ERR3563051	WGS	PRJEB34633	SAMEA5982324	CENTRE FOR GENOMIC EPIDEMIOLOGY, NATIONAL FOOD INS	public	ERX3561550	NextSeq 550	Illumina NextSeq	unspecified	PAIRED	RANDOM	METAGENOMIC	wastewater metagenome	ILLUMINA	2019-10-02T00:00:00Z	SAMEA5982324	ERP117567	sra	gs,ncbi,s3	gs.US,ncbi.public,s3.us-east-1	2022851272	Denmark	Europe	2017-07-11						55.6406	12.5056	2019-09-30	2019-09-30	2019-09-28	2019-09-28	SAMEA5982324	DTU-GE	Centre for Genomic Epidemiology\, National Food Institute\, Technical University of Denmark (DTU)\, Denmark	2019-09-30T17:04:26Z	2019-09-28T07:10:41Z	public	DTU2019-556-PRJ1066-RD-CPH-Sewage-277	DTU2019-556-PRJ1066-RD-CPH-Sewage-277	Denmark	55.6406	12.5056	Centre for Genomic Epidemiology
ERR3563052	WGS	PRJEB34633	SAMEA5982325	CENTRE FOR GENOMIC EPIDEMIOLOGY, NATIONAL FOOD INS	public	ERX3561551	NextSeq 550	Illumina NextSeq	unspecified	PAIRED	RANDOM	METAGENOMIC	wastewater metagenome	ILLUMINA	2019-10-02T00:00:00Z	SAMEA5982325	ERP117567	sra	gs,ncbi,s3	gs.US,ncbi.public,s3.us-east-1	1966618610	Denmark	Europe	2017-07-18						55.6406	12.5056	2019-09-30	2019-09-30	2019-09-28	2019-09-28	SAMEA5982325	DTU-GE	Centre for Genomic Epidemiology\, National Food Institute\, Technical University of Denmark (DTU)\, Denmark	2019-09-30T17:04:26Z	2019-09-28T07:10:41Z	public	DTU2019-561-PRJ1066-RD-CPH-Sewage-280	DTU2019-561-PRJ1066-RD-CPH-Sewage-280	Denmark	55.6406	12.5056	Centre for Genomic Epidemiology
ERR3563053	WGS	PRJEB34633	SAMEA5982326	CENTRE FOR GENOMIC EPIDEMIOLOGY, NATIONAL FOOD INS	public	ERX3561552	NextSeq 550	Illumina NextSeq	unspecified	PAIRED	RANDOM	METAGENOMIC	wastewater metagenome	ILLUMINA	2019-10-02T00:00:00Z	SAMEA5982326	ERP117567	sra	gs,ncbi,s3	gs.US,ncbi.public,s3.us-east-1	2832499767	Denmark	Europe	2017-07-27						55.6406	12.5056	2019-09-30	2019-09-30	2019-09-28	2019-09-28	SAMEA5982326	DTU-GE	Centre for Genomic Epidemiology\, National Food Institute\, Technical University of Denmark (DTU)\, Denmark	2019-09-30T17:04:26Z	2019-09-28T07:10:41Z	public	DTU2019-562-PRJ1066-RD-CPH-Sewage-283	DTU2019-562-PRJ1066-RD-CPH-Sewage-283	Denmark	55.6406	12.5056	Centre for Genomic Epidemiology
ERR3563054	WGS	PRJEB34633	SAMEA5982327	CENTRE FOR GENOMIC EPIDEMIOLOGY, NATIONAL FOOD INS	public	ERX3561553	NextSeq 550	Illumina NextSeq	unspecified	PAIRED	RANDOM	METAGENOMIC	wastewater metagenome	ILLUMINA	2019-10-02T00:00:00Z	SAMEA5982327	ERP117567	sra	gs,ncbi,s3	gs.US,ncbi.public,s3.us-east-1	1812726851	Denmark	Europe	2017-08-08						55.695	12.6147	2019-09-30	2019-09-30	2019-09-28	2019-09-28	SAMEA5982327	DTU-GE	Centre for Genomic Epidemiology\, National Food Institute\, Technical University of Denmark (DTU)\, Denmark	2019-09-30T17:04:26Z	2019-09-28T07:10:41Z	public	DTU2019-397-PRJ1066-RL-CPH-Sewage-285	DTU2019-397-PRJ1066-RL-CPH-Sewage-285	Denmark	55.695	12.6147	Centre for Genomic Epidemiology
ERR3563055	WGS	PRJEB34633	SAMEA5982328	CENTRE FOR GENOMIC EPIDEMIOLOGY, NATIONAL FOOD INS	public	ERX3561554	NextSeq 550	Illumina NextSeq	unspecified	PAIRED	RANDOM	METAGENOMIC	wastewater metagenome	ILLUMINA	2019-10-02T00:00:00Z	SAMEA5982328	ERP117567	sra	gs,ncbi,s3	gs.US,ncbi.public,s3.us-east-1	2233804277	Denmark	Europe	2017-08-08						55.6083	12.4503	2019-09-30	2019-09-30	2019-09-28	2019-09-28	SAMEA5982328	DTU-GE	Centre for Genomic Epidemiology\, National Food Institute\, Technical University of Denmark (DTU)\, Denmark	2019-09-30T17:04:26Z	2019-09-28T07:10:41Z	public	DTU2019-398-PRJ1066-RA-CPH-Sewage-286	DTU2019-398-PRJ1066-RA-CPH-Sewage-286	Denmark	55.6083	12.4503	Centre for Genomic Epidemiology
ERR3563056	WGS	PRJEB34633	SAMEA5982329	CENTRE FOR GENOMIC EPIDEMIOLOGY, NATIONAL FOOD INS	public	ERX3561555	NextSeq 550	Illumina NextSeq	unspecified	PAIRED	RANDOM	METAGENOMIC	wastewater metagenome	ILLUMINA	2019-10-02T00:00:00Z	SAMEA5982329	ERP117567	sra	gs,ncbi,s3	gs.US,ncbi.public,s3.us-east-1	2683671152	Denmark	Europe	2017-08-09						55.6406	12.5056	2019-09-30	2019-09-30	2019-09-28	2019-09-28	SAMEA5982329	DTU-GE	Centre for Genomic Epidemiology\, National Food Institute\, Technical University of Denmark (DTU)\, Denmark	2019-09-30T17:04:26Z	2019-09-28T07:10:41Z	public	DTU2019-399-PRJ1066-RD-CPH-Sewage-287	DTU2019-399-PRJ1066-RD-CPH-Sewage-287	Denmark	55.6406	12.5056	Centre for Genomic Epidemiology
ERR3563057	WGS	PRJEB34633	SAMEA5982330	CENTRE FOR GENOMIC EPIDEMIOLOGY, NATIONAL FOOD INS	public	ERX3561556	NextSeq 550	Illumina NextSeq	unspecified	PAIRED	RANDOM	METAGENOMIC	wastewater metagenome	ILLUMINA	2019-10-02T00:00:00Z	SAMEA5982330	ERP117567	sra	gs,ncbi,s3	gs.US,ncbi.public,s3.us-east-1	2718332109	Denmark	Europe	2017-08-23						55.6406	12.5056	2019-09-30	2019-09-30	2019-09-28	2019-09-28	SAMEA5982330	DTU-GE	Centre for Genomic Epidemiology\, National Food Institute\, Technical University of Denmark (DTU)\, Denmark	2019-09-30T17:04:26Z	2019-09-28T07:10:41Z	public	DTU2019-567-PRJ1066-RD-CPH-Sewage-293	DTU2019-567-PRJ1066-RD-CPH-Sewage-293	Denmark	55.6406	12.5056	Centre for Genomic Epidemiology
ERR3563058	WGS	PRJEB34633	SAMEA5982331	CENTRE FOR GENOMIC EPIDEMIOLOGY, NATIONAL FOOD INS	public	ERX3561557	NextSeq 550	Illumina NextSeq	unspecified	PAIRED	RANDOM	METAGENOMIC	wastewater metagenome	ILLUMINA	2019-10-02T00:00:00Z	SAMEA5982331	ERP117567	sra	gs,ncbi,s3	gs.US,ncbi.public,s3.us-east-1	2739427042	Denmark	Europe	2017-09-13						55.6406	12.5056	2019-09-30	2019-09-30	2019-09-28	2019-09-28	SAMEA5982331	DTU-GE	Centre for Genomic Epidemiology\, National Food Institute\, Technical University of Denmark (DTU)\, Denmark	2019-09-30T17:04:26Z	2019-09-28T07:10:41Z	public	DTU2018-1627-PRJ1066-RD-CPH-Sewage-297	DTU2018-1627-PRJ1066-RD-CPH-Sewage-297	Denmark	55.6406	12.5056	Centre for Genomic Epidemiology
ERR3563059	WGS	PRJEB34633	SAMEA5982332	CENTRE FOR GENOMIC EPIDEMIOLOGY, NATIONAL FOOD INS	public	ERX3561558	NextSeq 550	Illumina NextSeq	unspecified	PAIRED	RANDOM	METAGENOMIC	wastewater metagenome	ILLUMINA	2019-10-02T00:00:00Z	SAMEA5982332	ERP117567	sra	gs,ncbi,s3	gs.US,ncbi.public,s3.us-east-1	3615139274	Denmark	Europe	2017-09-13						55.695	12.6147	2019-09-30	2019-09-30	2019-09-28	2019-09-28	SAMEA5982332	DTU-GE	Centre for Genomic Epidemiology\, National Food Institute\, Technical University of Denmark (DTU)\, Denmark	2019-09-30T17:04:26Z	2019-09-28T07:10:41Z	public	DTU2018-1621-PRJ1066-RL-CPH-Sewage-298	DTU2018-1621-PRJ1066-RL-CPH-Sewage-298	Denmark	55.695	12.6147	Centre for Genomic Epidemiology
ERR3563060	WGS	PRJEB34633	SAMEA5982333	CENTRE FOR GENOMIC EPIDEMIOLOGY, NATIONAL FOOD INS	public	ERX3561559	NextSeq 550	Illumina NextSeq	unspecified	PAIRED	RANDOM	METAGENOMIC	wastewater metagenome	ILLUMINA	2019-10-02T00:00:00Z	SAMEA5982333	ERP117567	sra	gs,ncbi,s3	gs.US,ncbi.public,s3.us-east-1	2973039761	Denmark	Europe	2017-09-20						55.6083	12.4503	2019-09-30	2019-09-30	2019-09-28	2019-09-28	SAMEA5982333	DTU-GE	Centre for Genomic Epidemiology\, National Food Institute\, Technical University of Denmark (DTU)\, Denmark	2019-09-30T17:04:26Z	2019-09-28T07:10:41Z	public	DTU2018-1615-PRJ1066-RA-CPH-ReSewage-300	DTU2018-1615-PRJ1066-RA-CPH-ReSewage-300	Denmark	55.6083	12.4503	Centre for Genomic Epidemiology
ERR3563061	WGS	PRJEB34633	SAMEA5982334	CENTRE FOR GENOMIC EPIDEMIOLOGY, NATIONAL FOOD INS	public	ERX3561560	NextSeq 550	Illumina NextSeq	unspecified	PAIRED	RANDOM	METAGENOMIC	wastewater metagenome	ILLUMINA	2019-10-02T00:00:00Z	SAMEA5982334	ERP117567	sra	gs,ncbi,s3	gs.US,ncbi.public,s3.us-east-1	2705961838	Denmark	Europe	2017-10-05						55.6406	12.5056	2019-09-30	2019-09-30	2019-09-28	2019-09-28	SAMEA5982334	DTU-GE	Centre for Genomic Epidemiology\, National Food Institute\, Technical University of Denmark (DTU)\, Denmark	2019-09-30T17:04:26Z	2019-09-28T07:10:41Z	public	DTU2019-568-PRJ1066-RD-CPH-Sewage-306	DTU2019-568-PRJ1066-RD-CPH-Sewage-306	Denmark	55.6406	12.5056	Centre for Genomic Epidemiology
ERR3563062	WGS	PRJEB34633	SAMEA5982335	CENTRE FOR GENOMIC EPIDEMIOLOGY, NATIONAL FOOD INS	public	ERX3561561	NextSeq 550	Illumina NextSeq	unspecified	PAIRED	RANDOM	METAGENOMIC	wastewater metagenome	ILLUMINA	2019-10-02T00:00:00Z	SAMEA5982335	ERP117567	sra	gs,ncbi,s3	gs.US,ncbi.public,s3.us-east-1	3814864708	Denmark	Europe	2017-10-18						55.6083	12.4503	2019-09-30	2019-09-30	2019-09-28	2019-09-28	SAMEA5982335	DTU-GE	Centre for Genomic Epidemiology\, National Food Institute\, Technical University of Denmark (DTU)\, Denmark	2019-09-30T17:04:26Z	2019-09-28T07:10:41Z	public	DTU2018-1602-PRJ1066-RA-CPH-Sewage-312	DTU2018-1602-PRJ1066-RA-CPH-Sewage-312	Denmark	55.6083	12.4503	Centre for Genomic Epidemiology
ERR3563063	WGS	PRJEB34633	SAMEA5982336	CENTRE FOR GENOMIC EPIDEMIOLOGY, NATIONAL FOOD INS	public	ERX3561562	NextSeq 550	Illumina NextSeq	unspecified	PAIRED	RANDOM	METAGENOMIC	wastewater metagenome	ILLUMINA	2019-10-02T00:00:00Z	SAMEA5982336	ERP117567	sra	gs,ncbi,s3	gs.US,ncbi.public,s3.us-east-1	2444799801	Denmark	Europe	2017-10-27						55.6406	12.5056	2019-09-30	2019-09-30	2019-09-28	2019-09-28	SAMEA5982336	DTU-GE	Centre for Genomic Epidemiology\, National Food Institute\, Technical University of Denmark (DTU)\, Denmark	2019-09-30T17:04:26Z	2019-09-28T07:10:41Z	public	DTU2018-1608-PRJ1066-RD-CPH-Sewage-315	DTU2018-1608-PRJ1066-RD-CPH-Sewage-315	Denmark	55.6406	12.5056	Centre for Genomic Epidemiology
ERR3563064	WGS	PRJEB34633	SAMEA5982337	CENTRE FOR GENOMIC EPIDEMIOLOGY, NATIONAL FOOD INS	public	ERX3561563	NextSeq 550	Illumina NextSeq	unspecified	PAIRED	RANDOM	METAGENOMIC	wastewater metagenome	ILLUMINA	2019-10-02T00:00:00Z	SAMEA5982337	ERP117567	sra	gs,ncbi,s3	gs.US,ncbi.public,s3.us-east-1	2128180144	Denmark	Europe	2017-10-30						55.695	12.6147	2019-09-30	2019-09-30	2019-09-28	2019-09-28	SAMEA5982337	DTU-GE	Centre for Genomic Epidemiology\, National Food Institute\, Technical University of Denmark (DTU)\, Denmark	2019-09-30T17:04:26Z	2019-09-28T07:10:41Z	public	DTU2018-1597-PRJ1066-RL-CPH-Sewage-316	DTU2018-1597-PRJ1066-RL-CPH-Sewage-316	Denmark	55.695	12.6147	Centre for Genomic Epidemiology
ERR3563065	WGS	PRJEB34633	SAMEA5982338	CENTRE FOR GENOMIC EPIDEMIOLOGY, NATIONAL FOOD INS	public	ERX3561564	NextSeq 550	Illumina NextSeq	unspecified	PAIRED	RANDOM	METAGENOMIC	wastewater metagenome	ILLUMINA	2019-10-02T00:00:00Z	SAMEA5982338	ERP117567	fastq,sra	gs,ncbi,s3	gs.US,ncbi.public,s3.us-east-1	3529832470	Denmark	Europe	2017-11-01	246	8042669918				55.6406	12.5056	2019-09-30	2019-09-30	2019-09-28	2019-09-28	SAMEA5982338	DTU-GE	Centre for Genomic Epidemiology\, National Food Institute\, Technical University of Denmark (DTU)\, Denmark	2019-09-30T17:04:26Z	2019-09-28T07:10:41Z	public	DTU2018-1609-PRJ1066-RD-CPH-Sewage-317	DTU2018-1609-PRJ1066-RD-CPH-Sewage-317	Denmark	55.6406	12.5056	Centre for Genomic Epidemiology
ERR3563066	WGS	PRJEB34633	SAMEA5982339	CENTRE FOR GENOMIC EPIDEMIOLOGY, NATIONAL FOOD INS	public	ERX3561565	NextSeq 550	Illumina NextSeq	unspecified	PAIRED	RANDOM	METAGENOMIC	wastewater metagenome	ILLUMINA	2019-10-02T00:00:00Z	SAMEA5982339	ERP117567	sra	gs,ncbi,s3	gs.US,ncbi.public,s3.us-east-1	2744146539	Denmark	Europe	2017-11-04						55.6406	12.5056	2019-09-30	2019-09-30	2019-09-28	2019-09-28	SAMEA5982339	DTU-GE	Centre for Genomic Epidemiology\, National Food Institute\, Technical University of Denmark (DTU)\, Denmark	2019-09-30T17:04:26Z	2019-09-28T07:10:41Z	public	DTU2018-1610-PRJ1066-RD-CPH-Sewage-318-057	DTU2018-1610-PRJ1066-RD-CPH-Sewage-318-057	Denmark	55.6406	12.5056	Centre for Genomic Epidemiology
ERR3563067	WGS	PRJEB34633	SAMEA5982340	CENTRE FOR GENOMIC EPIDEMIOLOGY, NATIONAL FOOD INS	public	ERX3561566	NextSeq 550	Illumina NextSeq	unspecified	PAIRED	RANDOM	METAGENOMIC	wastewater metagenome	ILLUMINA	2019-10-02T00:00:00Z	SAMEA5982340	ERP117567	sra	gs,ncbi,s3	gs.US,ncbi.public,s3.us-east-1	2541037931	Denmark	Europe	2017-11-04						55.695	12.6147	2019-09-30	2019-09-30	2019-09-28	2019-09-28	SAMEA5982340	DTU-GE	Centre for Genomic Epidemiology\, National Food Institute\, Technical University of Denmark (DTU)\, Denmark	2019-09-30T17:04:26Z	2019-09-28T07:10:41Z	public	DTU2018-1598-PRJ1066-RL-CPH-Sewage-319	DTU2018-1598-PRJ1066-RL-CPH-Sewage-319	Denmark	55.695	12.6147	Centre for Genomic Epidemiology
ERR4682462	WGS	PRJEB40815	SAMEA7428369	CENTRE FOR GENOMIC EPIDEMIOLOGY, NATIONAL FOOD INS	public	ERX4603914	Illumina NovaSeq 6000		unspecified	PAIRED	RANDOM	METAGENOMIC	wastewater metagenome	ILLUMINA	2021-06-25T00:00:00Z	SAMEA7428369	ERP124492	fastq,sra	ncbi,gs,s3	s3.us-east-1,gs.US,ncbi.public	2914909712	Denmark	Europe	2017-11-18	300	9308997600		Denmark		55.6406	12.5056	2021-06-24	2021-06-24	2021-06-24	2021-06-24	SAMEA7428369	DTU-GE	Centre for Genomic Epidemiology\, National Food Institute\, Technical University of Denmark (DTU)\, Denmark	2021-06-24T12:26:19Z	2021-06-24T12:26:19Z	public	DTU_2017_631_1_MG_DK_VA_327	DTU_2017_631_1_MG_DK_VA_327				Centre for Genomic Epidemiology
ERR4682463	WGS	PRJEB40815	SAMEA7428370	CENTRE FOR GENOMIC EPIDEMIOLOGY, NATIONAL FOOD INS	public	ERX4603915	Illumina NovaSeq 6000		unspecified	PAIRED	RANDOM	METAGENOMIC	wastewater metagenome	ILLUMINA	2021-06-25T00:00:00Z	SAMEA7428370	ERP124492	fastq,sra	ncbi,gs,s3	gs.US,s3.us-east-1,ncbi.public	3855043335	Denmark	Europe	2017-11-18	300	11977177018		Denmark		55.6406	12.5056	2021-06-24	2021-06-24	2021-06-24	2021-06-24	SAMEA7428370	DTU-GE	Centre for Genomic Epidemiology\, National Food Institute\, Technical University of Denmark (DTU)\, Denmark	2021-06-24T12:26:19Z	2021-06-24T12:26:19Z	public	DTU_2017_632_1_MG_DK_MA_328	DTU_2017_632_1_MG_DK_MA_328				Centre for Genomic Epidemiology
ERR4682464	WGS	PRJEB40815	SAMEA7428371	CENTRE FOR GENOMIC EPIDEMIOLOGY, NATIONAL FOOD INS	public	ERX4603916	Illumina NovaSeq 6000		unspecified	PAIRED	RANDOM	METAGENOMIC	wastewater metagenome	ILLUMINA	2021-06-25T00:00:00Z	SAMEA7428371	ERP124492	fastq,sra	gs,ncbi,s3	gs.US,ncbi.public,s3.us-east-1	3005947042	Denmark	Europe	2017-11-18	300	9576829500		Denmark		55.695	12.6147	2021-06-24	2021-06-24	2021-06-24	2021-06-24	SAMEA7428371	DTU-GE	Centre for Genomic Epidemiology\, National Food Institute\, Technical University of Denmark (DTU)\, Denmark	2021-06-24T12:26:19Z	2021-06-24T12:26:19Z	public	DTU_2017_633_1_MG_DK_AV_329	DTU_2017_633_1_MG_DK_AV_329				Centre for Genomic Epidemiology
ERR3563068	WGS	PRJEB34633	SAMEA5982341	CENTRE FOR GENOMIC EPIDEMIOLOGY, NATIONAL FOOD INS	public	ERX3561567	NextSeq 550	Illumina NextSeq	unspecified	PAIRED	RANDOM	METAGENOMIC	wastewater metagenome	ILLUMINA	2019-10-02T00:00:00Z	SAMEA5982341	ERP117567	sra	gs,ncbi,s3	gs.US,ncbi.public,s3.us-east-1	2392245328	Denmark	Europe	2017-12-04						55.6406	12.5056	2019-09-30	2019-09-30	2019-09-28	2019-09-28	SAMEA5982341	DTU-GE	Centre for Genomic Epidemiology\, National Food Institute\, Technical University of Denmark (DTU)\, Denmark	2019-09-30T17:04:26Z	2019-09-28T07:10:41Z	public	DTU2019-557-PRJ1066-RD-CPH-Sewage-327	DTU2019-557-PRJ1066-RD-CPH-Sewage-327	Denmark	55.6406	12.5056	Centre for Genomic Epidemiology
ERR3563069	WGS	PRJEB34633	SAMEA5982342	CENTRE FOR GENOMIC EPIDEMIOLOGY, NATIONAL FOOD INS	public	ERX3561568	NextSeq 550	Illumina NextSeq	unspecified	PAIRED	RANDOM	METAGENOMIC	wastewater metagenome	ILLUMINA	2019-10-02T00:00:00Z	SAMEA5982342	ERP117567	sra	gs,ncbi,s3	gs.US,ncbi.public,s3.us-east-1	2741079222	Denmark	Europe	2018-01-02						55.6083	12.4503	2019-09-30	2019-09-30	2019-09-28	2019-09-28	SAMEA5982342	DTU-GE	Centre for Genomic Epidemiology\, National Food Institute\, Technical University of Denmark (DTU)\, Denmark	2019-09-30T17:04:26Z	2019-09-28T07:10:41Z	public	DTU2018-1616-PRJ1066-RA-CPH-ReSewage-340	DTU2018-1616-PRJ1066-RA-CPH-ReSewage-340	Denmark	55.6083	12.4503	Centre for Genomic Epidemiology
ERR3563070	WGS	PRJEB34633	SAMEA5982343	CENTRE FOR GENOMIC EPIDEMIOLOGY, NATIONAL FOOD INS	public	ERX3561569	NextSeq 550	Illumina NextSeq	unspecified	PAIRED	RANDOM	METAGENOMIC	wastewater metagenome	ILLUMINA	2019-10-02T00:00:00Z	SAMEA5982343	ERP117567	sra	gs,ncbi,s3	gs.US,ncbi.public,s3.us-east-1	3028992002	Denmark	Europe	2018-01-02						55.695	12.6147	2019-09-30	2019-09-30	2019-09-28	2019-09-28	SAMEA5982343	DTU-GE	Centre for Genomic Epidemiology\, National Food Institute\, Technical University of Denmark (DTU)\, Denmark	2019-09-30T17:04:26Z	2019-09-28T07:10:41Z	public	DTU2018-1622-PRJ1066-RL-CPH-Sewage-341	DTU2018-1622-PRJ1066-RL-CPH-Sewage-341	Denmark	55.695	12.6147	Centre for Genomic Epidemiology
ERR3563071	WGS	PRJEB34633	SAMEA5982344	CENTRE FOR GENOMIC EPIDEMIOLOGY, NATIONAL FOOD INS	public	ERX3561570	NextSeq 550	Illumina NextSeq	unspecified	PAIRED	RANDOM	METAGENOMIC	wastewater metagenome	ILLUMINA	2019-10-02T00:00:00Z	SAMEA5982344	ERP117567	sra	gs,ncbi,s3	gs.US,ncbi.public,s3.us-east-1	2508422098	Denmark	Europe	2018-01-15						55.6406	12.5056	2019-09-30	2019-09-30	2019-09-28	2019-09-28	SAMEA5982344	DTU-GE	Centre for Genomic Epidemiology\, National Food Institute\, Technical University of Denmark (DTU)\, Denmark	2019-09-30T17:04:26Z	2019-09-28T07:10:41Z	public	DTU2018-1628-PRJ1066-RD-CPH-Sewage-343	DTU2018-1628-PRJ1066-RD-CPH-Sewage-343	Denmark	55.6406	12.5056	Centre for Genomic Epidemiology
ERR3563072	WGS	PRJEB34633	SAMEA5982345	CENTRE FOR GENOMIC EPIDEMIOLOGY, NATIONAL FOOD INS	public	ERX3561571	NextSeq 550	Illumina NextSeq	unspecified	PAIRED	RANDOM	METAGENOMIC	wastewater metagenome	ILLUMINA	2019-10-02T00:00:00Z	SAMEA5982345	ERP117567	sra	gs,ncbi,s3	gs.US,ncbi.public,s3.us-east-1	2913561619	Denmark	Europe	2018-02-02						55.6406	12.5056	2019-09-30	2019-09-30	2019-09-28	2019-09-28	SAMEA5982345	DTU-GE	Centre for Genomic Epidemiology\, National Food Institute\, Technical University of Denmark (DTU)\, Denmark	2019-09-30T17:04:26Z	2019-09-28T07:10:41Z	public	DTU2019-558-PRJ1066-RD-CPH-Sewage-354	DTU2019-558-PRJ1066-RD-CPH-Sewage-354	Denmark	55.6406	12.5056	Centre for Genomic Epidemiology
ERR3563073	WGS	PRJEB34633	SAMEA5982346	CENTRE FOR GENOMIC EPIDEMIOLOGY, NATIONAL FOOD INS	public	ERX3561572	NextSeq 550	Illumina NextSeq	unspecified	PAIRED	RANDOM	METAGENOMIC	wastewater metagenome	ILLUMINA	2019-10-02T00:00:00Z	SAMEA5982346	ERP117567	fastq,sra	gs,ncbi,s3	gs.US,ncbi.public,s3.us-east-1	2630745175	Denmark	Europe	2018-02-13	279	5038226733				55.6406	12.5056	2019-09-30	2019-09-30	2020-07-17	2019-09-28	SAMEA5982346	DTU-GE	Centre for Genomic Epidemiology\, National Food Institute\, Technical University of Denmark (DTU)\, Denmark	2019-09-30T17:04:26Z	2019-09-28T07:10:41Z	public	DTU2019-563-PRJ1066-RD-CPH-Sewage-360	DTU2019-563-PRJ1066-RD-CPH-Sewage-360	Denmark	55.6406	12.5056	Centre for Genomic Epidemiology
ERR3563074	WGS	PRJEB34633	SAMEA5982347	CENTRE FOR GENOMIC EPIDEMIOLOGY, NATIONAL FOOD INS	public	ERX3561573	NextSeq 550	Illumina NextSeq	unspecified	PAIRED	RANDOM	METAGENOMIC	wastewater metagenome	ILLUMINA	2019-10-02T00:00:00Z	SAMEA5982347	ERP117567	sra	gs,ncbi,s3	gs.US,ncbi.public,s3.us-east-1	2603826179	Denmark	Europe	2018-02-26						55.6083	12.4503	2019-09-30	2019-09-30	2019-09-28	2019-09-28	SAMEA5982347	DTU-GE	Centre for Genomic Epidemiology\, National Food Institute\, Technical University of Denmark (DTU)\, Denmark	2019-09-30T17:04:26Z	2019-09-28T07:10:41Z	public	DTU2019-213-PRJ1066-RA-CPH-Sewage-366	DTU2019-213-PRJ1066-RA-CPH-Sewage-366	Denmark	55.6083	12.4503	Centre for Genomic Epidemiology
ERR3563075	WGS	PRJEB34633	SAMEA5982348	CENTRE FOR GENOMIC EPIDEMIOLOGY, NATIONAL FOOD INS	public	ERX3561574	NextSeq 550	Illumina NextSeq	unspecified	PAIRED	RANDOM	METAGENOMIC	wastewater metagenome	ILLUMINA	2019-10-02T00:00:00Z	SAMEA5982348	ERP117567	sra	gs,ncbi,s3	gs.US,ncbi.public,s3.us-east-1	2878196114	Denmark	Europe	2018-02-26						55.695	12.6147	2019-09-30	2019-09-30	2019-09-28	2019-09-28	SAMEA5982348	DTU-GE	Centre for Genomic Epidemiology\, National Food Institute\, Technical University of Denmark (DTU)\, Denmark	2019-09-30T17:04:26Z	2019-09-28T07:10:41Z	public	DTU2019-214-PRJ1066-RL-CPH-Sewage-367	DTU2019-214-PRJ1066-RL-CPH-Sewage-367	Denmark	55.695	12.6147	Centre for Genomic Epidemiology
ERR3563076	WGS	PRJEB34633	SAMEA5982349	CENTRE FOR GENOMIC EPIDEMIOLOGY, NATIONAL FOOD INS	public	ERX3561575	NextSeq 550	Illumina NextSeq	unspecified	PAIRED	RANDOM	METAGENOMIC	wastewater metagenome	ILLUMINA	2019-10-02T00:00:00Z	SAMEA5982349	ERP117567	sra	gs,ncbi,s3	gs.US,ncbi.public,s3.us-east-1	2599711751	Denmark	Europe	2018-02-26						55.6406	12.5056	2019-09-30	2019-09-30	2019-09-28	2019-09-28	SAMEA5982349	DTU-GE	Centre for Genomic Epidemiology\, National Food Institute\, Technical University of Denmark (DTU)\, Denmark	2019-09-30T17:04:26Z	2019-09-28T07:10:41Z	public	DTU2019-215-PRJ1066-RD-CPH-Sewage-368	DTU2019-215-PRJ1066-RD-CPH-Sewage-368	Denmark	55.6406	12.5056	Centre for Genomic Epidemiology
ERR3563077	WGS	PRJEB34633	SAMEA5982350	CENTRE FOR GENOMIC EPIDEMIOLOGY, NATIONAL FOOD INS	public	ERX3561576	NextSeq 550	Illumina NextSeq	unspecified	PAIRED	RANDOM	METAGENOMIC	wastewater metagenome	ILLUMINA	2019-10-02T00:00:00Z	SAMEA5982350	ERP117567	sra	gs,ncbi,s3	gs.US,ncbi.public,s3.us-east-1	2320403455	Denmark	Europe	2018-03-01						55.695	12.6147	2019-09-30	2019-09-30	2019-09-28	2019-09-28	SAMEA5982350	DTU-GE	Centre for Genomic Epidemiology\, National Food Institute\, Technical University of Denmark (DTU)\, Denmark	2019-09-30T17:04:26Z	2019-09-28T07:10:41Z	public	DTU2019-216-PRJ1066-RL-CPH-Sewage-369	DTU2019-216-PRJ1066-RL-CPH-Sewage-369	Denmark	55.695	12.6147	Centre for Genomic Epidemiology
ERR3563078	WGS	PRJEB34633	SAMEA5982351	CENTRE FOR GENOMIC EPIDEMIOLOGY, NATIONAL FOOD INS	public	ERX3561577	NextSeq 550	Illumina NextSeq	unspecified	PAIRED	RANDOM	METAGENOMIC	wastewater metagenome	ILLUMINA	2019-10-02T00:00:00Z	SAMEA5982351	ERP117567	sra	gs,ncbi,s3	gs.US,ncbi.public,s3.us-east-1	2856283155	Denmark	Europe	2018-03-01						55.6406	12.5056	2019-09-30	2019-09-30	2019-09-28	2019-09-28	SAMEA5982351	DTU-GE	Centre for Genomic Epidemiology\, National Food Institute\, Technical University of Denmark (DTU)\, Denmark	2019-09-30T17:04:26Z	2019-09-28T07:10:41Z	public	DTU2018-1629-PRJ1066-RD-CPH-Sewage-370	DTU2018-1629-PRJ1066-RD-CPH-Sewage-370	Denmark	55.6406	12.5056	Centre for Genomic Epidemiology
ERR3563079	WGS	PRJEB34633	SAMEA5982352	CENTRE FOR GENOMIC EPIDEMIOLOGY, NATIONAL FOOD INS	public	ERX3561578	NextSeq 550	Illumina NextSeq	unspecified	PAIRED	RANDOM	METAGENOMIC	wastewater metagenome	ILLUMINA	2019-10-02T00:00:00Z	SAMEA5982352	ERP117567	sra	gs,ncbi,s3	gs.US,ncbi.public,s3.us-east-1	2955008345	Denmark	Europe	2018-03-06						55.6083	12.4503	2019-09-30	2019-09-30	2019-09-28	2019-09-28	SAMEA5982352	DTU-GE	Centre for Genomic Epidemiology\, National Food Institute\, Technical University of Denmark (DTU)\, Denmark	2019-09-30T17:04:26Z	2019-09-28T07:10:41Z	public	DTU2018-1617-PRJ1066-RA-CPH-eSewage-371	DTU2018-1617-PRJ1066-RA-CPH-eSewage-371	Denmark	55.6083	12.4503	Centre for Genomic Epidemiology
ERR3563080	WGS	PRJEB34633	SAMEA5982353	CENTRE FOR GENOMIC EPIDEMIOLOGY, NATIONAL FOOD INS	public	ERX3561579	NextSeq 550	Illumina NextSeq	unspecified	PAIRED	RANDOM	METAGENOMIC	wastewater metagenome	ILLUMINA	2019-10-02T00:00:00Z	SAMEA5982353	ERP117567	sra	gs,ncbi,s3	gs.US,ncbi.public,s3.us-east-1	3657376885	Denmark	Europe	2018-03-06						55.695	12.6147	2019-09-30	2019-09-30	2019-09-28	2019-09-28	SAMEA5982353	DTU-GE	Centre for Genomic Epidemiology\, National Food Institute\, Technical University of Denmark (DTU)\, Denmark	2019-09-30T17:04:26Z	2019-09-28T07:10:41Z	public	DTU2018-1623-PRJ1066-RL-CPH-Sewage-372	DTU2018-1623-PRJ1066-RL-CPH-Sewage-372	Denmark	55.695	12.6147	Centre for Genomic Epidemiology
ERR3563081	WGS	PRJEB34633	SAMEA5982354	CENTRE FOR GENOMIC EPIDEMIOLOGY, NATIONAL FOOD INS	public	ERX3561580	NextSeq 550	Illumina NextSeq	unspecified	PAIRED	RANDOM	METAGENOMIC	wastewater metagenome	ILLUMINA	2019-10-02T00:00:00Z	SAMEA5982354	ERP117567	sra	gs,ncbi,s3	gs.US,ncbi.public,s3.us-east-1	2290188573	Denmark	Europe	2018-03-06						55.6406	12.5056	2019-09-30	2019-09-30	2019-09-28	2019-09-28	SAMEA5982354	DTU-GE	Centre for Genomic Epidemiology\, National Food Institute\, Technical University of Denmark (DTU)\, Denmark	2019-09-30T17:04:26Z	2019-09-28T07:10:42Z	public	DTU2019-217-PRJ1066-RD-CPH-Sewage-373	DTU2019-217-PRJ1066-RD-CPH-Sewage-373	Denmark	55.6406	12.5056	Centre for Genomic Epidemiology
ERR3563082	WGS	PRJEB34633	SAMEA5982355	CENTRE FOR GENOMIC EPIDEMIOLOGY, NATIONAL FOOD INS	public	ERX3561581	NextSeq 550	Illumina NextSeq	unspecified	PAIRED	RANDOM	METAGENOMIC	wastewater metagenome	ILLUMINA	2019-10-02T00:00:00Z	SAMEA5982355	ERP117567	sra	gs,ncbi,s3	gs.US,ncbi.public,s3.us-east-1	2902771047	Denmark	Europe	2018-03-12						55.6083	12.4503	2019-09-30	2019-09-30	2019-09-28	2019-09-28	SAMEA5982355	DTU-GE	Centre for Genomic Epidemiology\, National Food Institute\, Technical University of Denmark (DTU)\, Denmark	2019-09-30T17:04:26Z	2019-09-28T07:10:42Z	public	DTU2019-218-PRJ1066-RA-CPH-Sewage-374	DTU2019-218-PRJ1066-RA-CPH-Sewage-374	Denmark	55.6083	12.4503	Centre for Genomic Epidemiology
ERR3563083	WGS	PRJEB34633	SAMEA5982356	CENTRE FOR GENOMIC EPIDEMIOLOGY, NATIONAL FOOD INS	public	ERX3561582	NextSeq 550	Illumina NextSeq	unspecified	PAIRED	RANDOM	METAGENOMIC	wastewater metagenome	ILLUMINA	2019-10-02T00:00:00Z	SAMEA5982356	ERP117567	sra	gs,ncbi,s3	gs.US,ncbi.public,s3.us-east-1	4090421601	Denmark	Europe	2018-03-12						55.695	12.6147	2019-09-30	2019-09-30	2019-09-28	2019-09-28	SAMEA5982356	DTU-GE	Centre for Genomic Epidemiology\, National Food Institute\, Technical University of Denmark (DTU)\, Denmark	2019-09-30T17:04:26Z	2019-09-28T07:10:42Z	public	DTU2019-219-PRJ1066-RL-CPH-Sewage-375	DTU2019-219-PRJ1066-RL-CPH-Sewage-375	Denmark	55.695	12.6147	Centre for Genomic Epidemiology
ERR3563084	WGS	PRJEB34633	SAMEA5982357	CENTRE FOR GENOMIC EPIDEMIOLOGY, NATIONAL FOOD INS	public	ERX3561583	NextSeq 550	Illumina NextSeq	unspecified	PAIRED	RANDOM	METAGENOMIC	wastewater metagenome	ILLUMINA	2019-10-02T00:00:00Z	SAMEA5982357	ERP117567	sra	gs,ncbi,s3	gs.US,ncbi.public,s3.us-east-1	3721907277	Denmark	Europe	2018-03-12						55.6406	12.5056	2019-09-30	2019-09-30	2019-09-28	2019-09-28	SAMEA5982357	DTU-GE	Centre for Genomic Epidemiology\, National Food Institute\, Technical University of Denmark (DTU)\, Denmark	2019-09-30T17:04:26Z	2019-09-28T07:10:42Z	public	DTU2019-220-PRJ1066-RD-CPH-Sewage-376	DTU2019-220-PRJ1066-RD-CPH-Sewage-376	Denmark	55.6406	12.5056	Centre for Genomic Epidemiology
ERR3563085	WGS	PRJEB34633	SAMEA5982358	CENTRE FOR GENOMIC EPIDEMIOLOGY, NATIONAL FOOD INS	public	ERX3561584	NextSeq 550	Illumina NextSeq	unspecified	PAIRED	RANDOM	METAGENOMIC	wastewater metagenome	ILLUMINA	2019-10-02T00:00:00Z	SAMEA5982358	ERP117567	sra	gs,ncbi,s3	gs.US,ncbi.public,s3.us-east-1	2304105758	Denmark	Europe	2018-03-16						55.695	12.6147	2019-09-30	2019-09-30	2019-09-28	2019-09-28	SAMEA5982358	DTU-GE	Centre for Genomic Epidemiology\, National Food Institute\, Technical University of Denmark (DTU)\, Denmark	2019-09-30T17:04:26Z	2019-09-28T07:10:42Z	public	DTU2019-221-PRJ1066-RL-CPH-Sewage-377	DTU2019-221-PRJ1066-RL-CPH-Sewage-377	Denmark	55.695	12.6147	Centre for Genomic Epidemiology
ERR3563086	WGS	PRJEB34633	SAMEA5982359	CENTRE FOR GENOMIC EPIDEMIOLOGY, NATIONAL FOOD INS	public	ERX3561585	NextSeq 550	Illumina NextSeq	unspecified	PAIRED	RANDOM	METAGENOMIC	wastewater metagenome	ILLUMINA	2019-10-02T00:00:00Z	SAMEA5982359	ERP117567	sra	gs,ncbi,s3	gs.US,ncbi.public,s3.us-east-1	2854028559	Denmark	Europe	2018-03-16						55.6406	12.5056	2019-09-30	2019-09-30	2019-09-28	2019-09-28	SAMEA5982359	DTU-GE	Centre for Genomic Epidemiology\, National Food Institute\, Technical University of Denmark (DTU)\, Denmark	2019-09-30T17:04:26Z	2019-09-28T07:10:42Z	public	DTU2019-222-PRJ1066-RD-CPH-Sewage-378	DTU2019-222-PRJ1066-RD-CPH-Sewage-378	Denmark	55.6406	12.5056	Centre for Genomic Epidemiology
ERR3563087	WGS	PRJEB34633	SAMEA5982360	CENTRE FOR GENOMIC EPIDEMIOLOGY, NATIONAL FOOD INS	public	ERX3561586	NextSeq 550	Illumina NextSeq	unspecified	PAIRED	RANDOM	METAGENOMIC	wastewater metagenome	ILLUMINA	2019-10-02T00:00:00Z	SAMEA5982360	ERP117567	sra	gs,ncbi,s3	gs.US,ncbi.public,s3.us-east-1	4334132829	Denmark	Europe	2018-03-20						55.6083	12.4503	2019-09-30	2019-09-30	2019-09-28	2019-09-28	SAMEA5982360	DTU-GE	Centre for Genomic Epidemiology\, National Food Institute\, Technical University of Denmark (DTU)\, Denmark	2019-09-30T17:04:26Z	2019-09-28T07:10:42Z	public	DTU2019-223-PRJ1066-RA-CPH-Sewage-379	DTU2019-223-PRJ1066-RA-CPH-Sewage-379	Denmark	55.6083	12.4503	Centre for Genomic Epidemiology
ERR3563088	WGS	PRJEB34633	SAMEA5982361	CENTRE FOR GENOMIC EPIDEMIOLOGY, NATIONAL FOOD INS	public	ERX3561587	NextSeq 550	Illumina NextSeq	unspecified	PAIRED	RANDOM	METAGENOMIC	wastewater metagenome	ILLUMINA	2019-10-02T00:00:00Z	SAMEA5982361	ERP117567	sra	gs,ncbi,s3	gs.US,ncbi.public,s3.us-east-1	3415360709	Denmark	Europe	2018-03-20						55.695	12.6147	2019-09-30	2019-09-30	2019-09-28	2019-09-28	SAMEA5982361	DTU-GE	Centre for Genomic Epidemiology\, National Food Institute\, Technical University of Denmark (DTU)\, Denmark	2019-09-30T17:04:26Z	2019-09-28T07:10:42Z	public	DTU2019-224-PRJ1066-RL-CPH-Sewage-380	DTU2019-224-PRJ1066-RL-CPH-Sewage-380	Denmark	55.695	12.6147	Centre for Genomic Epidemiology
ERR3563089	WGS	PRJEB34633	SAMEA5982362	CENTRE FOR GENOMIC EPIDEMIOLOGY, NATIONAL FOOD INS	public	ERX3561588	NextSeq 550	Illumina NextSeq	unspecified	PAIRED	RANDOM	METAGENOMIC	wastewater metagenome	ILLUMINA	2019-10-02T00:00:00Z	SAMEA5982362	ERP117567	sra	gs,ncbi,s3	gs.US,ncbi.public,s3.us-east-1	3269481563	Denmark	Europe	2018-03-20						55.6406	12.5056	2019-09-30	2019-09-30	2019-09-28	2019-09-28	SAMEA5982362	DTU-GE	Centre for Genomic Epidemiology\, National Food Institute\, Technical University of Denmark (DTU)\, Denmark	2019-09-30T17:04:26Z	2019-09-28T07:10:42Z	public	DTU2019-225-PRJ1066-RD-CPH-Sewage-381	DTU2019-225-PRJ1066-RD-CPH-Sewage-381	Denmark	55.6406	12.5056	Centre for Genomic Epidemiology
ERR3563090	WGS	PRJEB34633	SAMEA5982363	CENTRE FOR GENOMIC EPIDEMIOLOGY, NATIONAL FOOD INS	public	ERX3561589	NextSeq 550	Illumina NextSeq	unspecified	PAIRED	RANDOM	METAGENOMIC	wastewater metagenome	ILLUMINA	2019-10-02T00:00:00Z	SAMEA5982363	ERP117567	sra	gs,ncbi,s3	gs.US,ncbi.public,s3.us-east-1	3027952665	Denmark	Europe	2018-04-22						55.6406	12.5056	2019-09-30	2019-09-30	2019-09-28	2019-09-28	SAMEA5982363	DTU-GE	Centre for Genomic Epidemiology\, National Food Institute\, Technical University of Denmark (DTU)\, Denmark	2019-09-30T17:04:26Z	2019-09-28T07:10:42Z	public	DTU2018-1611-PRJ1066-RD-CPH-Sewage-392-057	DTU2018-1611-PRJ1066-RD-CPH-Sewage-392-057	Denmark	55.6406	12.5056	Centre for Genomic Epidemiology
ERR3563091	WGS	PRJEB34633	SAMEA5982364	CENTRE FOR GENOMIC EPIDEMIOLOGY, NATIONAL FOOD INS	public	ERX3561590	NextSeq 550	Illumina NextSeq	unspecified	PAIRED	RANDOM	METAGENOMIC	wastewater metagenome	ILLUMINA	2019-10-02T00:00:00Z	SAMEA5982364	ERP117567	sra	gs,ncbi,s3	gs.US,ncbi.public,s3.us-east-1	4182166314	Denmark	Europe	2018-05-04						55.6083	12.4503	2019-09-30	2019-09-30	2019-09-28	2019-09-28	SAMEA5982364	DTU-GE	Centre for Genomic Epidemiology\, National Food Institute\, Technical University of Denmark (DTU)\, Denmark	2019-09-30T17:04:26Z	2019-09-28T07:10:42Z	public	DTU2018-1603-PRJ1066-RA-CPH-Sewage-397	DTU2018-1603-PRJ1066-RA-CPH-Sewage-397	Denmark	55.6083	12.4503	Centre for Genomic Epidemiology
ERR3563092	WGS	PRJEB34633	SAMEA5982365	CENTRE FOR GENOMIC EPIDEMIOLOGY, NATIONAL FOOD INS	public	ERX3561591	NextSeq 550	Illumina NextSeq	unspecified	PAIRED	RANDOM	METAGENOMIC	wastewater metagenome	ILLUMINA	2019-10-02T00:00:00Z	SAMEA5982365	ERP117567	sra	gs,ncbi,s3	gs.US,ncbi.public,s3.us-east-1	2889637208	Denmark	Europe	2018-05-04						55.6406	12.5056	2019-09-30	2019-09-30	2019-09-28	2019-09-28	SAMEA5982365	DTU-GE	Centre for Genomic Epidemiology\, National Food Institute\, Technical University of Denmark (DTU)\, Denmark	2019-09-30T17:04:26Z	2019-09-28T07:10:42Z	public	DTU2018-1612-PRJ1066-RD-CPH-Sewage-398-057	DTU2018-1612-PRJ1066-RD-CPH-Sewage-398-057	Denmark	55.6406	12.5056	Centre for Genomic Epidemiology
ERR3563093	WGS	PRJEB34633	SAMEA5982366	CENTRE FOR GENOMIC EPIDEMIOLOGY, NATIONAL FOOD INS	public	ERX3561592	NextSeq 550	Illumina NextSeq	unspecified	PAIRED	RANDOM	METAGENOMIC	wastewater metagenome	ILLUMINA	2019-10-02T00:00:00Z	SAMEA5982366	ERP117567	fastq,sra	gs,ncbi,s3	gs.US,ncbi.public,s3.us-east-1	3057452083	Denmark	Europe	2018-05-04	258	7203634112				55.695	12.6147	2019-09-30	2019-09-30	2021-10-22	2019-09-28	SAMEA5982366	DTU-GE	Centre for Genomic Epidemiology\, National Food Institute\, Technical University of Denmark (DTU)\, Denmark	2019-09-30T17:04:26Z	2019-09-28T07:10:42Z	public	DTU2018-1599-PRJ1066-RL-CPH-Sewage-399	DTU2018-1599-PRJ1066-RL-CPH-Sewage-399	Denmark	55.695	12.6147	Centre for Genomic Epidemiology
ERR3563094	WGS	PRJEB34633	SAMEA5982367	CENTRE FOR GENOMIC EPIDEMIOLOGY, NATIONAL FOOD INS	public	ERX3561593	NextSeq 550	Illumina NextSeq	unspecified	PAIRED	RANDOM	METAGENOMIC	wastewater metagenome	ILLUMINA	2019-10-02T00:00:00Z	SAMEA5982367	ERP117567	sra	gs,ncbi,s3	gs.US,ncbi.public,s3.us-east-1	3108872494	Denmark	Europe	2018-05-12						55.6083	12.4503	2019-09-30	2019-09-30	2019-09-28	2019-09-28	SAMEA5982367	DTU-GE	Centre for Genomic Epidemiology\, National Food Institute\, Technical University of Denmark (DTU)\, Denmark	2019-09-30T17:04:26Z	2019-09-28T07:10:42Z	public	DTU2018-1604-PRJ1066-RA-CPH-Sewage-400	DTU2018-1604-PRJ1066-RA-CPH-Sewage-400	Denmark	55.6083	12.4503	Centre for Genomic Epidemiology
ERR3563095	WGS	PRJEB34633	SAMEA5982368	CENTRE FOR GENOMIC EPIDEMIOLOGY, NATIONAL FOOD INS	public	ERX3561594	NextSeq 550	Illumina NextSeq	unspecified	PAIRED	RANDOM	METAGENOMIC	wastewater metagenome	ILLUMINA	2019-10-02T00:00:00Z	SAMEA5982368	ERP117567	sra	gs,ncbi,s3	gs.US,ncbi.public,s3.us-east-1	2518513728	Denmark	Europe	2018-05-12						55.6406	12.5056	2019-09-30	2019-09-30	2019-09-28	2019-09-28	SAMEA5982368	DTU-GE	Centre for Genomic Epidemiology\, National Food Institute\, Technical University of Denmark (DTU)\, Denmark	2019-09-30T17:04:26Z	2019-09-28T07:10:42Z	public	DTU2018-1613-PRJ1066-RD-CPH-ReSewage-401	DTU2018-1613-PRJ1066-RD-CPH-ReSewage-401	Denmark	55.6406	12.5056	Centre for Genomic Epidemiology
ERR3563096	WGS	PRJEB34633	SAMEA5982369	CENTRE FOR GENOMIC EPIDEMIOLOGY, NATIONAL FOOD INS	public	ERX3561595	NextSeq 550	Illumina NextSeq	unspecified	PAIRED	RANDOM	METAGENOMIC	wastewater metagenome	ILLUMINA	2019-10-02T00:00:00Z	SAMEA5982369	ERP117567	sra	gs,ncbi,s3	gs.US,ncbi.public,s3.us-east-1	3003930634	Denmark	Europe	2018-05-12						55.695	12.6147	2019-09-30	2019-09-30	2019-09-28	2019-09-28	SAMEA5982369	DTU-GE	Centre for Genomic Epidemiology\, National Food Institute\, Technical University of Denmark (DTU)\, Denmark	2019-09-30T17:04:26Z	2019-09-28T07:10:42Z	public	DTU2018-1600-PRJ1066-RL-CPH-Sewage-402	DTU2018-1600-PRJ1066-RL-CPH-Sewage-402	Denmark	55.695	12.6147	Centre for Genomic Epidemiology
ERR4682774	WGS	PRJEB40816	SAMEA7428415	CENTRE FOR GENOMIC EPIDEMIOLOGY, NATIONAL FOOD INS	public	ERX4604223	Illumina NovaSeq 6000		unspecified	PAIRED	RANDOM	METAGENOMIC	wastewater metagenome	ILLUMINA	2021-06-25T00:00:00Z	SAMEA7428415	ERP124493	sra,fastq	gs,ncbi,s3	ncbi.public,s3.us-east-1,gs.US	4876341687	Denmark	Europe	2018-06-11	285	14923907405		Denmark		57.7072	11.967	2021-06-24	2021-06-24	2021-06-24	2021-06-24	SAMEA7428415	DTU-GE	Centre for Genomic Epidemiology\, National Food Institute\, Technical University of Denmark (DTU)\, Denmark	2021-06-24T12:26:19Z	2021-06-24T12:26:19Z	public	DTU_2018_648_1_MG_DK_VA_336	DTU_2018_648_1_MG_DK_VA_336		57.7072	11.967	Centre for Genomic Epidemiology
ERR4682773	WGS	PRJEB40816	SAMEA7428414	CENTRE FOR GENOMIC EPIDEMIOLOGY, NATIONAL FOOD INS	public	ERX4604222	Illumina NovaSeq 6000		unspecified	PAIRED	RANDOM	METAGENOMIC	wastewater metagenome	ILLUMINA	2021-06-25T00:00:00Z	SAMEA7428414	ERP124493	sra,fastq	s3,gs,ncbi	s3.us-east-1,gs.US,ncbi.public	4515603009	Denmark	Europe	2018-06-11	290	13699974835		Denmark		55.695	12.6147	2021-06-24	2021-06-24	2021-06-24	2021-06-24	SAMEA7428414	DTU-GE	Centre for Genomic Epidemiology\, National Food Institute\, Technical University of Denmark (DTU)\, Denmark	2021-06-24T12:26:19Z	2021-06-24T12:26:19Z	public	DTU_2018_647_1_MG_DK_AV_335	DTU_2018_647_1_MG_DK_AV_335				Centre for Genomic Epidemiology
ERR4682775	WGS	PRJEB40816	SAMEA7428416	CENTRE FOR GENOMIC EPIDEMIOLOGY, NATIONAL FOOD INS	public	ERX4604224	Illumina NovaSeq 6000		unspecified	PAIRED	RANDOM	METAGENOMIC	wastewater metagenome	ILLUMINA	2021-06-25T00:00:00Z	SAMEA7428416	ERP124493	sra,fastq	ncbi,gs,s3	ncbi.public,s3.us-east-1,gs.US	5126372097	Denmark	Europe	2018-06-11	293	15787872624		Denmark		57.7072	11.967	2021-06-24	2021-06-24	2021-06-24	2021-06-24	SAMEA7428416	DTU-GE	Centre for Genomic Epidemiology\, National Food Institute\, Technical University of Denmark (DTU)\, Denmark	2021-06-24T12:26:19Z	2021-06-24T12:26:19Z	public	DTU_2018_649_1_MG_DK_AM_337	DTU_2018_649_1_MG_DK_AM_337				Centre for Genomic Epidemiology
ERR3563097	WGS	PRJEB34633	SAMEA5982370	CENTRE FOR GENOMIC EPIDEMIOLOGY, NATIONAL FOOD INS	public	ERX3561596	NextSeq 550	Illumina NextSeq	unspecified	PAIRED	RANDOM	METAGENOMIC	wastewater metagenome	ILLUMINA	2019-10-02T00:00:00Z	SAMEA5982370	ERP117567					Denmark	Europe	2018-06-24						55.6406	12.5056	2019-09-30	2019-09-30	2021-06-25	2019-09-28	SAMEA5982370	DTU-GE	Centre for Genomic Epidemiology\, National Food Institute\, Technical University of Denmark (DTU)\, Denmark	2019-09-30T17:04:26Z	2019-09-28T07:10:42Z	public	DTU2019-564-PRJ1066-RD-CPH-Sewage-416	DTU2019-564-PRJ1066-RD-CPH-Sewage-416	Denmark	55.6406	12.5056	Centre for Genomic Epidemiology
ERR3563098	WGS	PRJEB34633	SAMEA5982371	CENTRE FOR GENOMIC EPIDEMIOLOGY, NATIONAL FOOD INS	public	ERX3561597	NextSeq 550	Illumina NextSeq	unspecified	PAIRED	RANDOM	METAGENOMIC	wastewater metagenome	ILLUMINA	2019-10-02T00:00:00Z	SAMEA5982371	ERP117567	sra	gs,ncbi,s3	gs.US,ncbi.public,s3.us-east-1	2772524482	Denmark	Europe	2018-07-12						55.6406	12.5056	2019-09-30	2019-09-30	2019-09-28	2019-09-28	SAMEA5982371	DTU-GE	Centre for Genomic Epidemiology\, National Food Institute\, Technical University of Denmark (DTU)\, Denmark	2019-09-30T17:04:26Z	2019-09-28T07:10:42Z	public	DTU2018-1630-PRJ1066-RD-CPH-Sewage-421	DTU2018-1630-PRJ1066-RD-CPH-Sewage-421	Denmark	55.6406	12.5056	Centre for Genomic Epidemiology
ERR3563099	WGS	PRJEB34633	SAMEA5982372	CENTRE FOR GENOMIC EPIDEMIOLOGY, NATIONAL FOOD INS	public	ERX3561598	NextSeq 550	Illumina NextSeq	unspecified	PAIRED	RANDOM	METAGENOMIC	wastewater metagenome	ILLUMINA	2019-10-02T00:00:00Z	SAMEA5982372	ERP117567					Denmark	Europe	2018-07-27						55.6406	12.5056	2019-09-30	2019-09-30	2021-06-25	2019-09-28	SAMEA5982372	DTU-GE	Centre for Genomic Epidemiology\, National Food Institute\, Technical University of Denmark (DTU)\, Denmark	2019-09-30T17:04:26Z	2019-09-28T07:10:42Z	public	DTU2019-569-PRJ1066-RD-CPH-Sewage-427	DTU2019-569-PRJ1066-RD-CPH-Sewage-427	Denmark	55.6406	12.5056	Centre for Genomic Epidemiology
ERR3563100	WGS	PRJEB34633	SAMEA5982373	CENTRE FOR GENOMIC EPIDEMIOLOGY, NATIONAL FOOD INS	public	ERX3561599	NextSeq 550	Illumina NextSeq	unspecified	PAIRED	RANDOM	METAGENOMIC	wastewater metagenome	ILLUMINA	2019-10-02T00:00:00Z	SAMEA5982373	ERP117567	sra	gs,ncbi,s3	gs.US,ncbi.public,s3.us-east-1	3002863167	Denmark	Europe	2018-08-07						55.695	12.6147	2019-09-30	2019-09-30	2019-09-28	2019-09-28	SAMEA5982373	DTU-GE	Centre for Genomic Epidemiology\, National Food Institute\, Technical University of Denmark (DTU)\, Denmark	2019-09-30T17:04:26Z	2019-09-28T07:10:42Z	public	DTU2018-1624-PRJ1066-RL-CPH-Sewage-430	DTU2018-1624-PRJ1066-RL-CPH-Sewage-430	Denmark	55.695	12.6147	Centre for Genomic Epidemiology
ERR3563101	WGS	PRJEB34633	SAMEA5982374	CENTRE FOR GENOMIC EPIDEMIOLOGY, NATIONAL FOOD INS	public	ERX3561600	NextSeq 550	Illumina NextSeq	unspecified	PAIRED	RANDOM	METAGENOMIC	wastewater metagenome	ILLUMINA	2019-10-02T00:00:00Z	SAMEA5982374	ERP117567	sra	gs,ncbi,s3	gs.US,ncbi.public,s3.us-east-1	2897558870	Denmark	Europe	2018-08-07						55.6083	12.4503	2019-09-30	2019-09-30	2019-09-28	2019-09-28	SAMEA5982374	DTU-GE	Centre for Genomic Epidemiology\, National Food Institute\, Technical University of Denmark (DTU)\, Denmark	2019-09-30T17:04:26Z	2019-09-28T07:10:42Z	public	DTU2018-1618-PRJ1066-RA-CPH-Sewage-431	DTU2018-1618-PRJ1066-RA-CPH-Sewage-431	Denmark	55.6083	12.4503	Centre for Genomic Epidemiology
ERR3563102	WGS	PRJEB34633	SAMEA5982375	CENTRE FOR GENOMIC EPIDEMIOLOGY, NATIONAL FOOD INS	public	ERX3561601	NextSeq 550	Illumina NextSeq	unspecified	PAIRED	RANDOM	METAGENOMIC	wastewater metagenome	ILLUMINA	2019-10-02T00:00:00Z	SAMEA5982375	ERP117567					Denmark	Europe	2018-08-15						55.6406	12.5056	2019-09-30	2019-09-30	2021-06-25	2019-09-28	SAMEA5982375	DTU-GE	Centre for Genomic Epidemiology\, National Food Institute\, Technical University of Denmark (DTU)\, Denmark	2019-09-30T17:04:26Z	2019-09-28T07:10:42Z	public	DTU2019-570-PRJ1066-RD-CPH-Sewage-434	DTU2019-570-PRJ1066-RD-CPH-Sewage-434	Denmark	55.6406	12.5056	Centre for Genomic Epidemiology
[truncated: 1,454 more rows]
[truncated: 61 more columns]
